# Supplementary material for: Retrospective study: risk assessment model for osteoporosis—a detailed exploration involving 4,552 Shanghai dwellers
Source: PeerJ. 2023 Sep 8;11:e16017. doi: 10.7717/peerj.16017 (PMC10494836; doi:10.7717/peerj.16017)
Supplement: Data S1 [file peerj-11-16017-s001.xlsx]

## Sheet: rawdata1
bmd	LDL_mmol/L	BMI	TC_mmol/l	TG_mmol/l	FBG	HDL	SEX	AGE	MARRIAGE	education_illiteracy9	income_<10009	SMOKE	SALT	SLEEP	DRINK	HPT	DBT	HLP
normal	3.53	22.1	5.87	1.23	5.08	1.34	FEMALE	49	married	senior_high_school	3000-5000	NO	<6	3	NO	NO	NO	YES
normal	3.46	25.2	6.37	0.94	6.68	1.12	MALE	56	married	junior_high_school	3000-5000	YES	<6	4	YES	YES	YES	YES
normal	3.31	23	5.48	2.64	6.32	0.96	MALE	62	married	senior_high_school	3000-5000	NO	<6	4	NO	NO	NO	YES
normal	3.22	25.8	6.3	5.14	5.19	1.21	MALE	47	married	higher_education	3000-5000	NO	<6	4	NO	NO	NO	YES
normal	2.96	26.1	6.23	2.99	9.83	0.97	FEMALE	58	married	higher_education	3000-5000	NO	<6	3	NO	YES	YES	YES
normal	2.71	21.1	5.44	0.71	5.91	1.58	FEMALE	47	married	junior_high_school	3000-5000	NO	<6	4	NO	NO	NO	NO
normal	2.54	26	5.87	2.21	5.78	1.06	MALE	65	married	senior_high_school	3000-5000	NO	<6	3	NO	YES	YES	YES
normal	2.45	23.2	6.09	2	5.21	1.25	MALE	49	married	higher_education	1000-3000	NO	<6	4	YES	NO	NO	YES
normal	2.44	27.5	4.99	1.39	5.34	1.23	MALE	70	married	junior_high_school	1000-3000	NO	<6	5	YES	YES	NO	NO
normal	2.41	23.6	4.86	1.66	5.34	1.07	FEMALE	52	married	junior_high_school	3000-5000	NO	<6	2	NO	YES	NO	NO
normal	2.38	25	4.55	1.95	6.03	0.97	MALE	65	married	junior_high_school	3000-5000	NO	<6	3	NO	NO	NO	YES
normal	2.38	22.9	4.97	1.15	6.02	1.17	MALE	63	married	higher_education	3000-5000	NO	<6	3	NO	NO	YES	NO
normal	2.28	25.3	4.73	0.92	5.57	1.21	FEMALE	57	married	senior_high_school	3000-5000	NO	<6	2	NO	NO	NO	NO
normal	2.17	30.7	5.29	3.55	5.61	1.1	MALE	57	married	senior_high_school	3000-5000	YES	<6	4	YES	YES	NO	YES
normal	2.15	27.2	4.45	1.96	5.19	1.26	FEMALE	51	married	senior_high_school	1000-3000	NO	<6	4	NO	NO	NO	YES
normal	2.08	29.1	4.59	1.46	8.47	1.07	MALE	47	married	higher_education	3000-5000	NO	<6	3	YES	YES	YES	NO
normal	1.82	29.9	4.15	1.35	7	1.16	FEMALE	71	married	junior_high_school	3000-5000	NO	<6	2	NO	NO	YES	YES
normal	1.77	19.6	4.24	0.61	5.34	1.43	MALE	66	married	senior_high_school	3000-5000	NO	<6	2	NO	NO	YES	NO
normal	1.53	27.2	4.39	1.05	5.27	1.55	MALE	72	married	higher_education	3000-5000	NO	<6	3	NO	NO	NO	NO
normal	1.48	23.8	3.44	0.81	9.54	1.05	MALE	56	married	higher_education	3000-5000	NO	<6	4	YES	YES	YES	YES
normal	1	18.4	4.43	0.64	4.06	1.62	FEMALE	52	married	higher_education	3000-5000	NO	<6	4	NO	NO	NO	NO
normal	0.62	30.8	3.22	2.27	5.8	0.85	FEMALE	46	married	higher_education	3000-5000	NO	<6	4	NO	NO	NO	YES
normal	5.77	25	9.13	0.95	5.23	1.12	FEMALE	51	married	senior_high_school	3000-5000	NO	<6	3	NO	NO	NO	YES
normal	2.96	23.8	5.97	1.57	5.25	1.16	MALE	56	married	senior_high_school	3000-5000	YES	<6	4	NO	NO	NO	YES
normal	2.64	34	5.03	1.89	10.17	1.14	FEMALE	51	divorced	senior_high_school	3000-5000	NO	<6	3	NO	YES	YES	YES
normal	2.56	22.6	5.96	2.1	4.64	1.52	MALE	64	married	higher_education	3000-5000	NO	<6	4	NO	YES	NO	YES
normal	2.44	20.5	5.06	1.92	4.57	1.27	FEMALE	49	married	higher_education	3000-5000	NO	<6	2	NO	NO	NO	YES
normal	2.31	24	5.68	0.72	6.23	1.39	MALE	58	married	senior_high_school	5000to10000	NO	<6	4	YES	YES	NO	NO
normal	2.29	24	4.34	2.25	5.23	0.91	MALE	47	married	higher_education	3000-5000	NO	<6	4	NO	YES	NO	YES
normal	2.28	19.2	4.47	1.16	4.76	0.9	FEMALE	48	married	junior_high_school	3000-5000	NO	<6	4	NO	NO	NO	NO
normal	2.28	27	4.46	0.7	4.93	0.98	MALE	60	married	higher_education	3000-5000	NO	<6	3	YES	NO	NO	NO
normal	2.24	23.5	4.68	2.11	4.81	1.15	FEMALE	47	married	senior_high_school	>10000	NO	<6	4	NO	NO	NO	YES
normal	2.22	22.7	4.77	1.04	5.46	0.98	FEMALE	46	married	higher_education	3000-5000	NO	<6	4	NO	NO	NO	NO
normal	2.06	22	4.79	3.04	7.28	1.09	FEMALE	55	married	higher_education	3000-5000	NO	<6	3	NO	NO	NO	YES
normal	2.05	25.3	4.29	0.73	4.92	1.22	MALE	63	married	senior_high_school	3000-5000	NO	<6	5	NO	YES	NO	NO
normal	2.02	28.9	4.19	1.25	7.04	1.02	MALE	51	married	illiteracy	3000-5000	YES	<6	4	YES	YES	NO	NO
normal	1.95	21.7	4.01	1.11	5.93	0.98	MALE	46	married	higher_education	3000-5000	YES	<6	3	YES	NO	NO	NO
normal	1.94	24	5.01	1.07	6.29	1.28	MALE	74	married	junior_high_school	1000-3000	NO	<6	3	NO	YES	NO	NO
normal	1.72	25.1	3.77	2.35	5.27	1.01	MALE	77	married	higher_education	1000-3000	NO	<6	4	NO	YES	NO	YES
normal	1.69	22	4	1.88	5.08	0.99	FEMALE	51	married	higher_education	3000-5000	NO	<6	2	NO	NO	NO	YES
normal	1.58	27.3	4.95	1.37	5.06	1.01	FEMALE	55	married	junior_high_school	3000-5000	NO	<6	2	NO	NO	NO	NO
normal	1.49	26.1	4.18	2.65	5.46	0.94	FEMALE	60	married	junior_high_school	1000-3000	NO	<6	4	NO	YES	NO	YES
normal	1.24	28.6	4.28	1.92	7.67	1.16	MALE	58	married	higher_education	1000-3000	YES	<6	3	NO	YES	NO	YES
normal	1.22	27.3	5.09	1.69	5.8	1.15	MALE	47	married	higher_education	3000-5000	YES	<6	5	NO	YES	NO	NO
normal	1.2	23.3	3.45	1.13	5.53	0.89	MALE	63	married	senior_high_school	3000-5000	Quitting	<6	4	NO	YES	NO	NO
normal	4.22	19.2	7.44	1.07	4.89	1.29	FEMALE	50	married	senior_high_school	3000-5000	NO	<6	3	NO	NO	NO	YES
normal	3.69	28.5	5.77	1.49	5.1	1.19	FEMALE	64	married	junior_high_school	1000-3000	NO	<6	5	NO	NO	NO	YES
normal	3.13	30.4	6.09	3.69	6.05	1.05	FEMALE	65	married	junior_high_school	3000-5000	NO	<6	3	NO	YES	NO	YES
normal	2.15	21.6	4.94	1.13	4.94	1.48	FEMALE	47	married	senior_high_school	3000-5000	NO	<6	3	NO	NO	NO	NO
normal	2.06	27.6	5.1	1.2	5.1	1.34	FEMALE	65	married	primary_school	1000-3000	NO	<6	2	NO	YES	NO	YES
normal	1.82	25.2	5.25	1.66	5.26	1.13	FEMALE	52	married	higher_education	3000-5000	NO	<6	4	NO	NO	NO	NO
normal	1.75	29.4	4.41	2.85	5.23	0.86	MALE	47	married	higher_education	3000-5000	YES	<6	4	NO	YES	NO	YES
normal	1.63	27.4	4.57	6.27	9.95	0.89	MALE	70	married	junior_high_school	3000-5000	Quitting	<6	4	NO	NO	YES	YES
normal	1.49	21.8	4.81	2.06	5.25	1.44	FEMALE	52	married	higher_education	3000-5000	NO	<6	5	NO	NO	NO	YES
normal	1.4	20.7	5.58	1.78	5.01	1.54	FEMALE	48	married	higher_education	3000-5000	NO	<6	4	NO	NO	NO	YES
normal	1.27	27	4.76	1.29	4.85	1.43	FEMALE	47	married	higher_education	3000-5000	NO	<6	5	NO	NO	NO	NO
normal	5.26	22	9.1	1.18	5.25	1.64	FEMALE	47	married	higher_education	3000-5000	NO	<6	4	NO	NO	NO	YES
normal	3.83	26.4	6.79	3.9	5.78	1.06	MALE	57	married	senior_high_school	3000-5000	Quitting	<6	4	NO	YES	NO	YES
normal	3.72	28.9	6.3	2.03	5.3	1.22	MALE	50	married	higher_education	3000-5000	NO	<6	4	NO	YES	NO	YES
normal	3.71	27.6	6.65	2.84	5.34	1.31	MALE	54	married	higher_education	3000-5000	NO	<6	4	NO	YES	NO	YES
normal	3.52	25.5	7.41	2.25	7.37	1.32	MALE	63	married	higher_education	3000-5000	NO	<6	4	NO	NO	NO	YES
normal	3.17	22.2	5.99	1.32	5.79	1.66	FEMALE	51	widowed	junior_high_school	1000-3000	NO	<6	4	NO	YES	NO	YES
normal	2.93	24.4	5.69	1.12	5.34	1.41	FEMALE	53	married	higher_education	3000-5000	NO	<6	4	NO	YES	NO	NO
normal	2.85	27.8	6.54	5.84	5.16	1.21	FEMALE	65	married	junior_high_school	1000-3000	NO	<6	3	NO	YES	NO	YES
normal	2.72	29.4	5.33	2.8	8.95	1.08	MALE	55	married	senior_high_school	3000-5000	YES	<6	4	NO	YES	YES	YES
normal	2.49	22.3	6.54	1.3	5.57	1.57	FEMALE	51	married	senior_high_school	3000-5000	NO	<6	5	NO	YES	NO	YES
normal	2.45	21.3	5.81	0.7	6.95	2.05	FEMALE	67	married	primary_school	3000-5000	NO	<6	3	NO	YES	NO	YES
normal	2.39	21.7	4.89	1	5.13	1.37	FEMALE	63	married	higher_education	3000-5000	NO	<6	2	NO	YES	NO	NO
normal	2.28	21.6	4.95	1.1	4.82	1.35	FEMALE	49	married	higher_education	3000-5000	NO	<6	2	NO	NO	NO	NO
normal	2.23	23.7	4.55	1.04	8.18	1.17	MALE	63	married	higher_education	5000to10000	YES	<6	4	YES	NO	YES	NO
normal	2.19	20.2	6	1.33	4.67	1.33	FEMALE	49	married	higher_education	3000-5000	NO	<6	4	NO	NO	NO	YES
normal	1.99	29.2	4.42	1.08	4.91	1.24	FEMALE	51	married	higher_education	3000-5000	NO	<6	4	NO	NO	NO	NO
normal	1.97	22.7	6.34	2.6	4.8	1.26	FEMALE	50	married	higher_education	3000-5000	NO	<6	4	NO	NO	NO	YES
normal	1.77	21.8	5.72	1.16	5.18	1.48	FEMALE	68	married	higher_education	3000-5000	NO	<6	3	NO	NO	NO	YES
normal	1.73	23.3	5.34	1.02	4.59	1.74	FEMALE	75	married	higher_education	3000-5000	NO	<6	4	NO	YES	NO	NO
normal	1.69	24.5	4.46	0.75	5.04	1.13	MALE	67	married	higher_education	5000to10000	NO	<6	3	YES	NO	NO	NO
normal	1.54	23.5	3.31	1.22	6.08	0.87	MALE	78	married	senior_high_school	3000-5000	NO	<6	5	YES	YES	NO	NO
normal	0.83	25.2	3.9	1.82	5.25	0.88	FEMALE	45	married	junior_high_school	3000-5000	NO	<6	4	NO	NO	NO	YES
normal	0.82	24.6	3.35	1.34	5.44	1.18	FEMALE	54	married	higher_education	3000-5000	NO	<6	6	NO	NO	NO	NO
normal	3.26	23.9	6.25	1.41	5.24	1.29	FEMALE	61	married	senior_high_school	3000-5000	NO	<6	2	NO	YES	NO	YES
normal	3.18	23.9	5.99	2.05	4.96	1.26	MALE	45	married	higher_education	3000-5000	NO	<6	3	NO	YES	NO	YES
normal	2.99	20	6.27	1.3	5.09	1.52	MALE	70	married	senior_high_school	3000-5000	NO	<6	2	NO	NO	NO	YES
normal	2.96	23.8	5.23	1.39	5.75	1.03	MALE	52	married	higher_education	3000-5000	YES	<6	4	NO	YES	NO	NO
normal	2.84	28.7	5.93	2.97	5.58	1.34	FEMALE	53	married	higher_education	3000-5000	NO	<6	3	NO	YES	YES	YES
normal	2.78	20.5	5.54	2.15	9.16	1.23	FEMALE	67	married	senior_high_school	3000-5000	NO	<6	4	NO	NO	NO	YES
normal	2.7	24.5	4.9	1.61	4.51	0.85	FEMALE	47	married	higher_education	3000-5000	NO	<6	3	NO	NO	NO	NO
normal	2.58	27.3	5.96	2.85	6.01	1.3	MALE	46	married	senior_high_school	3000-5000	YES	<6	3	YES	NO	NO	YES
normal	2.49	21.1	4.75	1.48	6.05	1.11	FEMALE	51	married	higher_education	3000-5000	NO	<6	5	NO	NO	NO	NO
normal	2.4	27.5	4.59	1.6	7.51	0.88	MALE	66	married	higher_education	3000-5000	NO	<6	4	NO	YES	YES	NO
normal	2.35	19	4.96	1.11	5.38	1.16	MALE	70	married	junior_high_school	1000-3000	NO	<6	2	NO	NO	NO	NO
normal	2.12	20.7	4.94	1.29	5.01	1.1	FEMALE	49	married	higher_education	3000-5000	NO	<6	3	NO	NO	NO	NO
normal	2.09	22.9	4.8	0.83	5.1	1.54	FEMALE	50	married	senior_high_school	3000-5000	NO	<6	3	NO	NO	NO	NO
normal	2.09	19.1	3.91	0.71	5.23	1.11	MALE	73	married	junior_high_school	3000-5000	NO	<6	2	NO	NO	NO	YES
normal	2.05	28.4	4.59	2.16	8.9	1.08	FEMALE	65	married	primary_school	1000-3000	NO	<6	3	NO	YES	YES	YES
normal	2.04	20.5	5.09	1.01	4.79	1.72	FEMALE	48	married	higher_education	3000-5000	NO	<6	4	NO	NO	NO	NO
normal	1.91	24.3	5.98	1.84	5.01	1.31	MALE	37	married	junior_high_school	3000-5000	YES	<6	4	NO	NO	NO	YES
normal	1.81	25.2	4.66	1.3	5.56	1.11	MALE	46	married	higher_education	5000to10000	YES	<6	3	NO	YES	NO	NO
normal	1.79	23.8	4.22	1.64	4.87	1.18	FEMALE	56	married	senior_high_school	3000-5000	NO	<6	4	NO	NO	NO	NO
normal	1.72	21.2	3.94	1.3	4.76	0.95	MALE	64	married	higher_education	3000-5000	NO	<6	4	NO	NO	NO	NO
normal	1.7	25	5.53	1.52	4.56	1.29	MALE	51	married	higher_education	3000-5000	YES	<6	3	NO	NO	NO	NO
normal	1.57	20.8	4.51	0.6	5.27	1.41	FEMALE	47	married	higher_education	3000-5000	NO	<6	4	NO	NO	NO	NO
normal	1.52	24.9	4.89	0.75	4.97	1.71	FEMALE	55	married	senior_high_school	1000-3000	NO	<6	2	NO	YES	NO	NO
normal	1.43	24.6	3.57	1.63	5.02	0.89	MALE	68	married	higher_education	3000-5000	YES	<6	4	NO	NO	NO	YES
normal	1.19	25.8	3.95	0.91	5.1	1.18	FEMALE	63	married	primary_school	1000-3000	NO	<6	3	NO	NO	NO	NO
normal	1.11	24	4.79	1.08	6.86	1.45	FEMALE	51	married	junior_high_school	3000-5000	NO	<6	4	NO	NO	NO	NO
normal	1.11	22.9	3.47	1.21	7.33	1.04	MALE	71	married	junior_high_school	3000-5000	NO	<6	4	NO	YES	YES	NO
normal	3.81	24.7	7.06	2.56	5.26	1.1	FEMALE	50	married	junior_high_school	3000-5000	NO	<6	4	NO	YES	NO	YES
normal	3.4	24.2	6.74	2.61	4.74	1.39	MALE	61	married	junior_high_school	3000-5000	NO	<6	2	NO	YES	NO	YES
normal	3.4	24.2	6.74	2.61	4.74	1.39	MALE	61	married	junior_high_school	3000-5000	NO	<6	2	NO	YES	NO	YES
normal	3.29	25.6	6.82	5.57	7.97	1.36	MALE	55	married	higher_education	3000-5000	NO	<6	4	YES	YES	NO	YES
normal	3.08	24.8	5.09	2.38	4.87	0.86	MALE	46	married	higher_education	3000-5000	YES	<6	3	NO	NO	NO	YES
normal	3.03	23.5	5.37	0.97	5.52	0.98	MALE	77	married	higher_education	3000-5000	NO	<6	4	NO	YES	NO	NO
normal	2.46	32.4	5.42	3.87	11.3	1.26	FEMALE	50	married	senior_high_school	3000-5000	NO	<6	4	NO	YES	NO	YES
normal	2.43	27.3	5.69	1.5	5.79	1.13	FEMALE	56	married	senior_high_school	3000-5000	NO	<6	4	NO	YES	NO	NO
normal	2.4	21.4	7.39	1.52	4.85	1.42	FEMALE	54	married	junior_high_school	3000-5000	NO	<6	4	NO	NO	NO	YES
normal	2.11	27.8	4.37	3.25	7.86	0.9	MALE	56	married	higher_education	3000-5000	YES	<6	4	NO	NO	NO	YES
normal	1.98	24.8	6.72	1.05	5.15	2.37	FEMALE	53	married	higher_education	3000-5000	NO	<6	3	NO	YES	NO	YES
normal	1.94	25.6	4.23	1.31	6.65	0.92	MALE	47	married	higher_education	3000-5000	NO	<6	4	NO	YES	NO	NO
normal	1.47	24.3	4.5	2.48	4.59	0.98	MALE	61	married	junior_high_school	3000-5000	NO	<6	3	NO	YES	NO	YES
normal	1.29	24.7	5.09	2.45	6.2	1.12	MALE	52	married	junior_high_school	3000-5000	YES	<6	1	YES	YES	NO	YES
normal	1.18	22.9	3.53	0.8	4.75	1.25	FEMALE	46	married	senior_high_school	3000-5000	NO	<6	3	NO	YES	NO	NO
normal	1.18	28.6	3.66	0.81	9.31	1.09	MALE	59	married	higher_education	3000-5000	NO	<6	4	NO	YES	NO	NO
normal	0.96	25.7	4.09	2.69	4.97	0.92	MALE	50	married	higher_education	3000-5000	NO	<6	3	NO	YES	NO	YES
normal	3.37	23.1	6.18	1.6	4.63	1.45	FEMALE	46	married	higher_education	3000-5000	NO	<6	4	NO	NO	NO	YES
normal	3.21	25	7.23	1.48	6.22	1.38	FEMALE	70	married	junior_high_school	3000-5000	NO	<6	3	NO	NO	NO	YES
normal	3.02	24.6	5.92	3.85	7.11	1.19	FEMALE	65	married	higher_education	3000-5000	NO	<6	4	NO	YES	NO	YES
normal	2.88	26.9	6.19	1.59	6.19	1.85	FEMALE	75	married	junior_high_school	3000-5000	NO	<6	2	NO	YES	NO	YES
normal	2.77	29.5	5.57	1.38	4.89	1.17	MALE	63	married	junior_high_school	3000-5000	YES	<6	5	NO	YES	NO	NO
normal	2.61	18.9	6.08	1.23	4.93	1.59	FEMALE	53	married	higher_education	3000-5000	NO	<6	3	NO	NO	NO	YES
normal	2.54	24.5	5.02	2.59	5.78	1.01	MALE	48	married	higher_education	3000-5000	NO	<6	4	NO	YES	NO	YES
normal	2.42	23.8	5.12	2.43	4.89	1.03	FEMALE	51	married	senior_high_school	3000-5000	NO	<6	4	NO	NO	NO	YES
normal	2.37	28.3	6.05	1.84	8.52	1.18	MALE	49	married	higher_education	3000-5000	YES	<6	4	YES	YES	NO	YES
normal	1.78	28.1	3.46	0.76	5.4	1.13	MALE	77	married	junior_high_school	5000to10000	NO	<6	5	YES	YES	NO	NO
normal	1.68	23	4.39	2.06	5.78	1.2	FEMALE	46	married	senior_high_school	3000-5000	NO	<6	4	NO	NO	NO	YES
normal	1.64	25.2	5.26	1.62	4.86	1.39	FEMALE	51	married	higher_education	3000-5000	NO	<6	3	NO	YES	NO	NO
normal	1.59	27.2	4.73	1.34	4.59	1.02	FEMALE	46	married	higher_education	3000-5000	NO	<6	4	NO	NO	NO	NO
normal	1.4	24.4	5.06	1.85	5.8	1.09	MALE	48	married	higher_education	3000-5000	Quitting	<6	3	NO	YES	NO	YES
normal	1.37	27.2	4.78	1.29	7.86	1.03	MALE	50	married	higher_education	3000-5000	YES	<6	4	NO	NO	YES	NO
normal	1.22	22.4	3.42	1.2	4.95	1.06	FEMALE	61	married	senior_high_school	3000-5000	NO	<6	4	NO	YES	NO	NO
normal	1.13	18.9	4.47	0.71	5.79	1.37	FEMALE	50	married	higher_education	3000-5000	NO	<6	4	NO	NO	NO	NO
normal	3.87	23.6	6.87	1.24	12.94	1.38	MALE	71	married	senior_high_school	3000-5000	YES	<6	5	NO	NO	NO	YES
normal	3.21	25.6	6.19	3.89	5.38	1.08	MALE	50	married	higher_education	3000-5000	Quitting	<6	4	NO	YES	NO	YES
normal	3.03	23.9	5.56	2.23	6.18	1.08	MALE	49	married	higher_education	3000-5000	YES	<6	4	NO	YES	NO	YES
normal	2.89	17.2	5.64	1.12	5.3	1.23	MALE	62	married	senior_high_school	3000-5000	YES	<6	5	NO	NO	NO	NO
normal	2.67	23.9	5.91	1.75	5.71	1.61	FEMALE	61	married	senior_high_school	3000-5000	NO	<6	3	NO	YES	NO	YES
normal	2.66	25.9	4.97	1.71	6.64	1.01	MALE	61	married	senior_high_school	3000-5000	YES	<6	5	NO	NO	NO	YES
normal	2.41	26.7	5.24	1.29	6.16	1.19	FEMALE	52	married	senior_high_school	3000-5000	NO	<6	3	NO	YES	NO	NO
normal	2.4	28.4	5.64	4.43	5.02	1.1	FEMALE	56	married	senior_high_school	3000-5000	NO	<6	3	NO	YES	NO	YES
normal	2.38	26	4.93	2.93	5.31	0.98	MALE	51	married	higher_education	3000-5000	NO	<6	3	NO	YES	NO	YES
normal	2.37	26.3	5.3	2.85	5.78	1.12	FEMALE	69	married	junior_high_school	1000-3000	NO	<6	4	NO	YES	NO	YES
normal	2.28	32	4.4	1.32	4.63	0.92	MALE	47	married	higher_education	3000-5000	YES	<6	4	NO	YES	NO	NO
normal	2.25	27.5	6.79	1.97	4.79	1.54	FEMALE	51	married	higher_education	3000-5000	NO	<6	3	NO	NO	NO	YES
normal	2.24	21.7	5.34	1.49	5.22	1	MALE	48	married	higher_education	3000-5000	NO	<6	4	NO	NO	NO	NO
normal	2.15	22.7	4.32	1.06	4.77	1.04	MALE	47	married	higher_education	3000-5000	YES	<6	4	NO	NO	NO	NO
normal	2.08	32.4	4.19	0.79	7.72	0.99	MALE	46	married	higher_education	3000-5000	NO	<6	4	NO	NO	NO	NO
normal	1.94	21.6	4.41	0.59	5.07	1.18	FEMALE	45	married	higher_education	3000-5000	NO	<6	4	NO	NO	NO	NO
normal	1.86	20.7	4.56	0.9	5.59	0.97	MALE	64	married	senior_high_school	1000-3000	Quitting	<6	2	NO	NO	YES	NO
normal	1.85	28.7	4.35	1.26	4.72	1.17	MALE	45	married	senior_high_school	3000-5000	NO	<6	5	YES	YES	NO	NO
normal	1.77	24.8	4.67	0.76	4.54	1.26	FEMALE	55	married	senior_high_school	3000-5000	NO	<6	2	NO	NO	NO	NO
normal	1.76	29.7	4.66	1.35	5.18	0.91	MALE	49	married	higher_education	3000-5000	NO	<6	4	NO	YES	NO	NO
normal	1.76	23.9	4.42	1.17	5.48	1.16	MALE	61	married	junior_high_school	3000-5000	NO	<6	5	NO	NO	NO	YES
normal	1.18	25.3	3.5	2.79	4.96	0.92	MALE	69	married	higher_education	3000-5000	NO	<6	4	NO	YES	NO	YES
normal	3.54	20.5	6.94	1.35	5.51	1.96	FEMALE	47	married	higher_education	3000-5000	NO	<6	2	NO	NO	NO	YES
normal	3.39	22.9	6.34	1.46	7.75	1.42	FEMALE	79	married	higher_education	3000-5000	NO	<6	2	NO	YES	YES	YES
normal	2.97	24	5.65	1.58	5.61	1.09	FEMALE	56	married	junior_high_school	3000-5000	NO	<6	4	NO	NO	NO	NO
normal	2.89	22.2	5.94	1.64	6.27	1.16	MALE	66	married	senior_high_school	1000-3000	NO	<6	2	NO	YES	NO	YES
normal	2.85	26.6	5.6	1.9	6.01	1.08	MALE	48	married	higher_education	3000-5000	YES	<6	3	NO	NO	NO	YES
normal	2.76	30.9	4.99	1.95	4.82	0.9	MALE	55	married	senior_high_school	3000-5000	Quitting	<6	4	YES	YES	NO	YES
normal	2.55	28.5	5.93	1.38	5.09	1.02	FEMALE	60	married	higher_education	3000-5000	NO	<6	3	NO	YES	NO	YES
normal	2.27	27	4.45	2.61	5.46	1.12	MALE	51	married	higher_education	3000-5000	YES	<6	3	NO	YES	NO	YES
normal	2.2	20.7	5.37	0.57	4.97	2.06	FEMALE	46	married	higher_education	3000-5000	NO	<6	3	NO	NO	NO	NO
normal	2.07	29.4	3.97	1.04	5.81	0.84	MALE	63	married	higher_education	3000-5000	NO	<6	4	NO	YES	NO	NO
normal	1.82	29.4	4.75	3.15	5.34	0.89	FEMALE	47	married	higher_education	3000-5000	NO	<6	4	NO	NO	NO	YES
normal	1.34	23.9	4.67	2.36	5.71	1.03	FEMALE	45	married	higher_education	3000-5000	NO	<6	4	NO	NO	NO	YES
normal	1.26	24.1	4.06	1.61	10.7	1.05	MALE	47	married	junior_high_school	3000-5000	YES	<6	4	NO	YES	YES	YES
normal	1.25	21.8	3.07	0.83	5.7	1.03	FEMALE	47	married	higher_education	3000-5000	NO	<6	4	NO	NO	NO	NO
normal	0.95	22.6	4.57	0.96	4.69	1.23	FEMALE	48	married	junior_high_school	3000-5000	NO	<6	3	NO	NO	NO	NO
normal	0.71	29.7	5.45	12.88	5.03	1.03	MALE	47	married	higher_education	3000-5000	YES	<6	4	NO	YES	NO	YES
normal	3.13	24.8	5.63	1.14	5.16	1.61	FEMALE	64	married	higher_education	3000-5000	NO	<6	3	NO	YES	NO	NO
normal	3.04	31.3	5.7	2.83	5.06	1.04	FEMALE	52	married	junior_high_school	3000-5000	NO	<6	4	NO	YES	NO	YES
normal	2.59	19.4	5.12	1.19	5.31	1.12	MALE	49	married	higher_education	3000-5000	NO	<6	4	YES	NO	NO	NO
normal	2.54	24.7	5.41	2.04	5.16	1.15	FEMALE	55	married	higher_education	3000-5000	NO	<6	4	NO	NO	NO	YES
normal	2.52	24.4	4.79	1.48	5.23	1.01	MALE	50	married	higher_education	3000-5000	NO	<6	3	NO	NO	NO	YES
normal	2.44	24.4	4.72	1.61	6.16	1.1	MALE	60	married	senior_high_school	3000-5000	NO	<6	3	NO	YES	NO	NO
normal	2.3	20.3	5.04	1.44	5.41	1.17	FEMALE	52	married	senior_high_school	3000-5000	YES	<6	3	NO	NO	NO	NO
normal	2.22	25.9	4.46	1.85	6.31	1.03	MALE	54	married	higher_education	3000-5000	NO	<6	4	NO	YES	NO	YES
normal	1.87	28.3	3.86	1.23	4.83	0.98	FEMALE	75	married	higher_education	3000-5000	NO	<6	4	NO	YES	NO	NO
normal	1.49	23.7	4.73	6.19	5.54	0.97	MALE	46	married	higher_education	3000-5000	YES	<6	3	NO	YES	NO	YES
normal	1.07	18.7	3.64	1.06	4.6	1.26	FEMALE	50	married	higher_education	5000to10000	NO	<6	3	NO	NO	NO	NO
normal	1	23.9	4.58	1.41	4.95	1.13	MALE	50	married	higher_education	3000-5000	Quitting	<6	4	NO	NO	NO	NO
normal	5.65	19	9.79	0.65	5.37	1.84	FEMALE	27	married	higher_education	3000-5000	NO	<6	5	NO	NO	NO	YES
normal	5.18	26.2	8.17	1.76	8.22	1.27	MALE	44	married	senior_high_school	3000-5000	YES	<6	3	YES	YES	NO	YES
normal	5.07	26.4	8.53	3.66	5.72	1.16	MALE	39	married	higher_education	3000-5000	NO	<6	4	NO	NO	NO	YES
normal	4.67	32	7.69	3	7.67	1.2	MALE	43	married	higher_education	3000-5000	YES	<6	3	NO	YES	NO	YES
normal	4.43	28	7.89	1.04	4.27	1.55	FEMALE	29	married	higher_education	3000-5000	NO	<6	2	NO	NO	NO	YES
normal	4.41	30.5	7.1	1.22	5.37	1.18	MALE	28	married	higher_education	3000-5000	NO	<6	4	NO	NO	NO	YES
normal	4.35	24.4	6.96	0.96	4.76	1.45	MALE	37	married	higher_education	3000-5000	NO	<6	4	NO	NO	NO	YES
normal	4.12	30.1	7.09	4.39	7.23	1	FEMALE	35	married	higher_education	>10000	NO	<6	3	NO	NO	NO	YES
normal	4.01	21.6	7.01	1.5	5.72	1.19	MALE	51	married	higher_education	1000-3000	NO	<6	3	YES	YES	NO	YES
normal	3.96	25.5	7.38	2.04	4.91	1.49	FEMALE	50	married	higher_education	3000-5000	NO	<6	4	NO	NO	NO	YES
normal	3.85	29.2	6.58	1.87	5.25	1.3	FEMALE	47	married	senior_high_school	3000-5000	NO	<6	3	NO	NO	NO	YES
normal	3.78	29.4	6.34	2.98	8.07	0.94	FEMALE	31	married	higher_education	3000-5000	NO	<6	4	NO	NO	NO	YES
normal	3.77	25.5	6.56	1.45	5.6	1.23	FEMALE	67	married	junior_high_school	3000-5000	NO	<6	2	NO	YES	NO	YES
normal	3.74	29.9	6.58	5.57	5.2	1.13	MALE	32	spinsterhood	higher_education	3000-5000	NO	<6	4	YES	YES	NO	YES
normal	3.65	27.8	6.58	2.54	5.53	1.12	FEMALE	43	married	junior_high_school	1000-3000	NO	<6	2	NO	NO	NO	YES
normal	3.51	27.6	6.16	1.01	5.03	1.06	MALE	31	married	higher_education	3000-5000	YES	<6	4	NO	YES	NO	YES
normal	3.49	27.5	6.67	9.12	4.38	0.93	MALE	34	married	higher_education	5000to10000	NO	<6	3	NO	NO	NO	YES
normal	3.48	24.2	5.58	1.44	5.11	1.12	MALE	36	married	higher_education	3000-5000	NO	<6	4	YES	NO	NO	YES
normal	3.48	27.3	7.62	5.12	6.44	1.15	MALE	49	married	junior_high_school	3000-5000	YES	<6	2	NO	YES	NO	YES
normal	3.47	23.9	6.53	1.46	4.67	1.17	MALE	37	married	higher_education	3000-5000	NO	<6	3	YES	YES	NO	YES
normal	3.46	30.2	6.87	2.08	5.27	1.21	MALE	37	married	higher_education	3000-5000	NO	<6	4	NO	NO	NO	YES
normal	3.44	26.5	5.82	1.65	4.81	1.12	MALE	33	married	higher_education	3000-5000	YES	<6	4	NO	NO	NO	YES
normal	3.4	26.1	6.7	3.82	4.94	1.05	MALE	41	married	senior_high_school	3000-5000	YES	<6	5	YES	NO	NO	YES
normal	3.4	26.2	6	3.34	5.54	1.05	MALE	34	married	higher_education	3000-5000	Quitting	<6	4	YES	YES	NO	YES
normal	3.39	24	6.26	1.98	5.33	1.31	FEMALE	44	married	higher_education	3000-5000	NO	<6	4	NO	NO	NO	YES
normal	3.36	28.4	6.84	6.58	5.88	1.08	MALE	41	married	higher_education	3000-5000	YES	<6	3	YES	YES	NO	YES
normal	3.36	26	6.45	1.09	11.01	1.16	FEMALE	66	married	junior_high_school	3000-5000	NO	<6	3	NO	YES	YES	YES
normal	3.35	23.1	6.26	2.15	5.59	1.12	MALE	41	married	higher_education	3000-5000	YES	<6	4	NO	NO	NO	YES
normal	3.33	21.6	6.18	1.99	5.31	1.31	MALE	36	married	higher_education	3000-5000	YES	<6	4	NO	NO	NO	YES
normal	3.33	26.4	5.97	1.52	5.31	1.11	MALE	51	married	higher_education	3000-5000	YES	<6	4	NO	NO	NO	YES
normal	3.32	24.4	6.06	1.93	5.19	1.23	FEMALE	53	married	junior_high_school	1000-3000	NO	<6	5	NO	NO	NO	YES
normal	3.31	30.1	5.97	6.78	14.4	0.96	MALE	38	married	higher_education	3000-5000	YES	<6	4	NO	YES	YES	YES
normal	3.31	29.9	5.69	1.64	5.38	0.91	MALE	34	married	higher_education	3000-5000	YES	<6	4	YES	NO	NO	NO
normal	3.31	31.8	5.93	1.54	5.52	1.21	MALE	33	married	higher_education	3000-5000	NO	<6	3	YES	YES	NO	YES
normal	3.3	30.7	6.21	1.65	4.81	1.48	MALE	36	married	higher_education	3000-5000	NO	<6	3	NO	NO	NO	YES
normal	3.25	28	5.71	1.43	5.65	1.34	MALE	28	spinsterhood	higher_education	3000-5000	NO	<6	4	NO	NO	NO	YES
normal	3.23	25.9	6.2	2.16	5.54	1.35	MALE	42	married	higher_education	3000-5000	NO	<6	4	NO	NO	NO	YES
normal	3.22	26.3	6.54	3.94	5.95	1.16	MALE	41	married	higher_education	3000-5000	YES	<6	4	NO	NO	NO	YES
normal	3.2	28.1	6.17	1.6	5.31	1.39	FEMALE	34	married	higher_education	1000-3000	NO	<6	4	NO	NO	NO	YES
normal	3.19	27.4	5.41	2.78	4.99	0.95	MALE	30	married	senior_high_school	3000-5000	YES	<6	5	NO	NO	NO	YES
normal	3.18	31.3	6	1.37	4.94	1.38	FEMALE	39	married	senior_high_school	1000-3000	NO	<6	5	NO	NO	NO	YES
normal	3.18	27.9	6.06	7.53	5.28	1.07	FEMALE	26	spinsterhood	higher_education	3000-5000	NO	<6	4	NO	NO	NO	YES
normal	3.16	21.9	5.8	1.02	4.94	1.25	MALE	33	married	higher_education	3000-5000	NO	<6	3	NO	YES	NO	YES
normal	3.15	24.5	5.81	3.03	4.82	1.1	MALE	33	married	higher_education	5000to10000	YES	<6	4	YES	NO	NO	YES
normal	3.15	25.2	5.32	1.13	5.91	1.44	FEMALE	66	married	junior_high_school	3000-5000	NO	<6	4	NO	YES	NO	NO
normal	3.13	24.9	5.59	1.78	5.18	1.07	MALE	49	married	junior_high_school	1000-3000	YES	<6	4	NO	NO	NO	YES
normal	3.11	25.8	5.6	1	5.21	1.43	MALE	31	spinsterhood	higher_education	3000-5000	NO	<6	3	NO	YES	NO	NO
normal	3.11	26.1	5.67	3.17	5.3	1.05	FEMALE	33	married	higher_education	3000-5000	NO	<6	3	NO	NO	NO	YES
normal	3.1	32.4	5.51	2.79	5.14	0.92	MALE	35	married	higher_education	3000-5000	NO	<6	4	NO	YES	NO	YES
normal	3.08	27.3	5.12	2.96	5.34	0.82	MALE	38	married	higher_education	3000-5000	NO	<6	4	NO	YES	NO	YES
normal	3.08	22.7	5.8	2.31	5.92	1.38	MALE	30	married	higher_education	3000-5000	YES	<6	4	NO	NO	NO	YES
normal	3.06	32.8	5.56	1.49	4.98	1.09	MALE	34	married	higher_education	3000-5000	YES	<6	4	YES	NO	NO	NO
normal	3.05	26.6	6.42	5.71	5.09	1.13	MALE	32	married	higher_education	3000-5000	NO	<6	4	NO	YES	NO	YES
normal	3.05	29.3	5.52	1.64	5.46	0.89	MALE	33	married	senior_high_school	3000-5000	NO	<6	5	NO	YES	NO	NO
normal	3.03	36.1	5.7	0.98	5.27	1.31	MALE	34	married	higher_education	>10000	YES	<6	3	YES	YES	NO	YES
normal	3.03	25.5	5.65	2.23	5.07	0.95	FEMALE	42	married	senior_high_school	3000-5000	NO	<6	4	NO	NO	NO	YES
normal	3.03	25.5	5.65	2.23	5.07	0.95	FEMALE	42	married	senior_high_school	3000-5000	NO	<6	4	NO	NO	NO	YES
normal	3.02	22.7	5.91	1.07	6.18	1.51	FEMALE	40	married	higher_education	3000-5000	NO	<6	2	NO	NO	NO	YES
normal	3.02	19.7	5.63	0.9	5	1.2	FEMALE	42	married	junior_high_school	1000-3000	NO	<6	3	NO	NO	NO	NO
normal	3.01	23.8	5.67	1.05	5.22	1.4	FEMALE	28	married	higher_education	3000-5000	NO	<6	4	NO	NO	NO	NO
normal	3.01	31	5.45	2.31	4.74	0.94	MALE	34	remarry	higher_education	3000-5000	YES	<6	2	NO	NO	NO	YES
normal	3.01	58.3	5.2	1.45	5.86	0.83	FEMALE	26	married	senior_high_school	3000-5000	YES	<6	3	NO	NO	NO	NO
normal	3	24.5	5.31	2.1	5.27	0.86	MALE	42	married	higher_education	3000-5000	YES	<6	3	NO	NO	NO	YES
normal	3	29.1	5.86	1.44	10.41	1.46	MALE	32	married	higher_education	3000-5000	NO	<6	4	NO	NO	NO	YES
normal	2.99	23.3	7.51	1.65	9.18	1.33	MALE	37	married	higher_education	3000-5000	NO	<6	4	YES	NO	NO	YES
normal	2.98	29.4	5.33	2.85	4.64	0.96	MALE	27	spinsterhood	higher_education	3000-5000	NO	<6	4	NO	NO	NO	YES
normal	2.96	29.9	5.64	3.16	5	0.98	MALE	37	married	higher_education	3000-5000	YES	<6	4	NO	YES	NO	YES
normal	2.96	25.3	5.43	1.5	4.64	1.16	MALE	42	married	higher_education	3000-5000	NO	<6	4	NO	YES	NO	NO
normal	2.96	29.6	5.4	3.76	5.48	1.04	MALE	36	married	higher_education	1000-3000	NO	<6	3	NO	YES	NO	YES
normal	2.95	29.9	5.98	1.78	5.43	1.16	MALE	41	married	higher_education	3000-5000	Quitting	<6	4	NO	NO	NO	YES
normal	2.94	25.7	5.19	5.93	5.56	1	MALE	48	married	senior_high_school	3000-5000	NO	<6	4	YES	YES	NO	YES
normal	2.94	25.4	5.77	1.24	4.66	1.26	FEMALE	28	married	higher_education	3000-5000	NO	<6	1	NO	NO	NO	YES
normal	2.91	26.9	5.26	2.93	5.34	0.88	MALE	33	married	higher_education	3000-5000	YES	<6	4	NO	NO	NO	YES
normal	2.91	26.9	5.6	1.1	5.05	1.13	MALE	42	married	higher_education	1000-3000	NO	<6	3	NO	YES	NO	NO
normal	2.91	34.5	5.81	2.3	5.83	1.13	MALE	30	married	higher_education	3000-5000	NO	<6	3	YES	NO	NO	YES
normal	2.91	17.7	5.7	0.65	5.19	1.74	FEMALE	26	spinsterhood	higher_education	3000-5000	NO	<6	3	NO	NO	NO	YES
normal	2.89	20.3	5.52	1.15	5.13	1.42	FEMALE	35	married	higher_education	3000-5000	NO	<6	5	NO	NO	NO	NO
normal	2.89	30.5	7.68	2.62	4.94	2.03	MALE	36	married	higher_education	3000-5000	NO	<6	4	NO	NO	NO	YES
normal	2.89	18.8	5.63	0.83	4.87	1.61	FEMALE	35	married	higher_education	3000-5000	NO	<6	4	NO	NO	NO	NO
normal	2.86	32.4	4.91	2.71	5.44	0.74	MALE	36	married	junior_high_school	3000-5000	NO	<6	4	NO	YES	NO	YES
normal	2.86	22.5	5.35	1.31	5.1	1.26	MALE	35	married	higher_education	3000-5000	NO	<6	4	NO	NO	NO	NO
normal	2.85	25.4	5.62	1.75	4.93	0.99	MALE	32	married	higher_education	5000to10000	YES	<6	3	NO	NO	NO	YES
normal	2.85	24.6	5.29	1.36	5.16	1.21	MALE	37	married	higher_education	3000-5000	NO	<6	4	YES	NO	NO	NO
normal	2.84	23.9	6.59	1.62	5.16	1.22	FEMALE	55	married	higher_education	3000-5000	NO	<6	4	NO	NO	NO	YES
normal	2.83	30.7	5.51	1.26	7.13	0.91	MALE	44	married	higher_education	3000-5000	NO	<6	4	NO	YES	NO	NO
normal	2.83	27.1	6.92	1.9	6.15	1.44	FEMALE	49	married	junior_high_school	3000-5000	NO	<6	3	NO	NO	NO	YES
normal	2.83	27.1	4.76	2.77	5.16	0.99	MALE	38	married	higher_education	3000-5000	NO	<6	4	YES	YES	NO	YES
normal	2.83	25.2	5.32	1.34	5.19	1.03	MALE	50	married	higher_education	3000-5000	NO	<6	3	NO	YES	NO	NO
normal	2.83	21.4	6.27	1.4	4.56	1.29	FEMALE	27	married	higher_education	3000-5000	NO	<6	4	NO	NO	NO	YES
normal	2.82	28	5.63	0.85	4.41	1.09	MALE	36	married	higher_education	3000-5000	NO	<6	4	NO	YES	NO	NO
normal	2.82	30.6	5.35	4.21	5.69	0.88	MALE	32	married	higher_education	3000-5000	YES	<6	3	NO	NO	NO	YES
normal	2.8	23.9	5.39	1.82	5.14	1.23	FEMALE	30	married	higher_education	3000-5000	NO	<6	3	NO	NO	NO	YES
normal	2.79	25.9	5.29	0.61	5.18	1.2	MALE	33	married	higher_education	3000-5000	YES	<6	4	YES	NO	NO	NO
normal	2.79	26.2	5.47	1.96	4.92	1.12	FEMALE	41	married	higher_education	3000-5000	NO	<6	4	NO	NO	NO	YES
normal	2.78	28.3	5.87	3.22	5.56	1.4	MALE	35	married	higher_education	5000to10000	YES	<6	4	YES	YES	NO	YES
normal	2.77	22.4	5.16	2.02	5.54	0.93	MALE	31	married	higher_education	3000-5000	NO	<6	3	NO	YES	NO	YES
normal	2.76	22.8	5.62	1.16	4.71	1.34	MALE	34	married	higher_education	3000-5000	NO	<6	5	NO	NO	NO	NO
normal	2.76	23.3	5.22	1.54	5.77	1.08	FEMALE	41	married	higher_education	3000-5000	NO	<6	3	NO	NO	NO	NO
normal	2.76	23.8	5.35	0.85	5.08	1.34	FEMALE	44	married	higher_education	3000-5000	NO	<6	5	NO	NO	NO	NO
normal	2.75	24.8	5.24	2.16	5.42	1.06	MALE	39	married	higher_education	3000-5000	NO	<6	4	NO	NO	NO	YES
normal	2.75	31.8	5.4	1.01	4.75	1.36	FEMALE	38	married	higher_education	3000-5000	NO	<6	4	NO	NO	NO	NO
normal	2.74	22.9	5.44	1.09	5.25	1.54	FEMALE	39	married	higher_education	3000-5000	NO	<6	4	NO	NO	NO	NO
normal	2.73	23.1	5.97	6.4	5.16	1.05	MALE	38	married	higher_education	3000-5000	YES	<6	3	NO	NO	NO	YES
normal	2.73	27.6	5.42	3.81	5.55	1.02	MALE	33	married	higher_education	3000-5000	YES	<6	3	NO	YES	NO	YES
normal	2.73	25.3	6.12	1.46	4.81	0.95	MALE	33	married	higher_education	3000-5000	YES	<6	2	YES	NO	NO	YES
normal	2.72	24	5.17	1.55	4.97	1.2	MALE	44	married	higher_education	3000-5000	NO	<6	4	NO	NO	NO	NO
normal	2.72	26.5	4.86	2.18	5.02	1	FEMALE	40	married	higher_education	3000-5000	NO	<6	4	NO	NO	NO	YES
normal	2.72	33.2	6.17	1.59	4.97	1.23	MALE	40	married	higher_education	3000-5000	NO	<6	3	NO	NO	NO	YES
normal	2.71	20.8	7.18	1.71	4.84	1.52	MALE	30	married	higher_education	3000-5000	YES	<6	2	NO	NO	NO	YES
normal	2.69	25.7	5.63	3.9	5.07	0.95	MALE	34	married	junior_high_school	3000-5000	YES	<6	5	NO	NO	NO	YES
normal	2.69	29.6	5.24	3.21	4.39	0.99	MALE	26	spinsterhood	higher_education	3000-5000	NO	<6	4	NO	YES	NO	YES
normal	2.68	22.8	5.57	0.73	4.81	1.59	MALE	38	married	higher_education	3000-5000	YES	<6	4	NO	NO	NO	NO
normal	2.68	26.9	5.48	3.26	5.58	1.04	MALE	40	married	junior_high_school	3000-5000	YES	<6	4	NO	NO	NO	YES
normal	2.67	24	5.36	1.58	5.12	0.99	MALE	36	married	higher_education	3000-5000	NO	<6	5	NO	NO	NO	NO
normal	2.67	24.6	5.47	2.61	5.01	1.47	FEMALE	33	married	higher_education	3000-5000	NO	<6	4	NO	NO	NO	YES
normal	2.67	18.4	5.77	0.85	4.56	1.84	FEMALE	32	married	higher_education	3000-5000	NO	<6	4	NO	NO	NO	YES
normal	2.66	26.3	5.01	5.02	10.62	0.97	MALE	38	married	senior_high_school	3000-5000	YES	<6	4	YES	YES	NO	YES
normal	2.65	24.9	5.26	1.19	5.52	1.41	FEMALE	41	married	higher_education	3000-5000	NO	<6	4	NO	NO	NO	NO
normal	2.65	29.5	4.67	2.46	5.35	0.85	MALE	37	married	higher_education	3000-5000	NO	<6	4	NO	NO	NO	YES
normal	2.65	25.5	6.73	3.25	5.37	1.53	MALE	44	married	higher_education	3000-5000	NO	<6	4	NO	YES	NO	YES
normal	2.65	31.1	4.89	2.5	5	1.01	FEMALE	33	married	higher_education	3000-5000	NO	<6	4	NO	NO	NO	YES
normal	2.64	25.9	5.41	0.77	5.68	1.23	FEMALE	42	married	higher_education	3000-5000	NO	<6	4	NO	NO	NO	NO
normal	2.64	24.1	5.17	1	5.96	1.23	MALE	36	married	higher_education	3000-5000	NO	<6	4	NO	NO	NO	NO
normal	2.64	17.1	4.88	1.8	5.31	1.16	FEMALE	33	married	higher_education	3000-5000	NO	<6	4	NO	NO	NO	YES
normal	2.64	23.9	4.93	2.4	4.43	1.07	MALE	28	married	higher_education	3000-5000	YES	<6	4	NO	NO	NO	YES
normal	2.64	21	5.14	1.78	6.11	1.13	MALE	29	married	higher_education	3000-5000	NO	<6	4	NO	NO	NO	YES
normal	2.63	28.2	5.42	3.12	4.54	0.83	MALE	33	married	higher_education	3000-5000	YES	<6	4	NO	NO	NO	YES
normal	2.63	23	4.95	1.34	4.97	1.01	FEMALE	42	married	higher_education	3000-5000	NO	<6	4	NO	NO	NO	NO
normal	2.62	23.9	4.97	2.06	5.36	1.1	MALE	36	married	higher_education	3000-5000	NO	<6	4	NO	NO	NO	YES
normal	2.62	30.3	5.01	1.26	5.05	1.07	FEMALE	30	married	higher_education	3000-5000	NO	<6	4	NO	NO	NO	NO
normal	2.61	20.2	5.06	1.28	5.67	1.28	MALE	40	married	junior_high_school	3000-5000	NO	<6	4	NO	NO	NO	NO
normal	2.59	22.9	4.75	0.89	6.37	0.95	MALE	38	married	higher_education	3000-5000	YES	<6	2	YES	NO	NO	NO
normal	2.59	22.3	5.32	1.21	4.86	1.43	FEMALE	33	married	higher_education	3000-5000	NO	<6	4	NO	NO	NO	NO
normal	2.58	22.8	5.34	3.9	5.09	1.16	MALE	39	married	higher_education	3000-5000	YES	<6	4	NO	NO	NO	YES
normal	2.58	32	4.53	1.49	5.52	0.8	MALE	30	spinsterhood	higher_education	3000-5000	YES	<6	4	NO	NO	NO	NO
normal	2.58	21.1	5.87	1.14	5.43	1.22	FEMALE	30	married	higher_education	3000-5000	NO	<6	4	NO	NO	NO	YES
normal	2.58	23.7	5.24	1.59	6.09	1.11	MALE	31	married	higher_education	3000-5000	NO	<6	4	YES	YES	NO	NO
normal	2.57	24	4.68	1.44	5.12	0.92	MALE	37	married	higher_education	3000-5000	NO	<6	5	YES	YES	NO	NO
normal	2.56	22	6.19	2.47	4.77	1.06	MALE	33	married	higher_education	3000-5000	NO	<6	4	NO	NO	NO	YES
normal	2.56	24.4	4.74	3.64	4.51	0.88	MALE	30	married	higher_education	3000-5000	NO	<6	3	NO	NO	NO	YES
normal	2.55	28.8	6.4	2.43	5.23	1.09	MALE	50	married	senior_high_school	3000-5000	NO	<6	4	NO	NO	NO	YES
normal	2.55	25.5	5.29	0.58	5.35	1.57	FEMALE	42	married	higher_education	3000-5000	NO	<6	5	NO	YES	NO	NO
normal	2.55	24.5	5.19	1.53	5.32	1.13	FEMALE	42	married	higher_education	3000-5000	NO	<6	4	NO	NO	NO	NO
normal	2.54	23	4.91	3.27	5.08	0.92	MALE	35	married	higher_education	3000-5000	NO	<6	4	NO	YES	NO	YES
normal	2.53	22.8	4.65	1.18	5.46	1.1	MALE	49	married	higher_education	3000-5000	YES	<6	5	YES	NO	NO	NO
normal	2.53	23.6	5.72	0.59	4.86	1.69	FEMALE	44	married	higher_education	3000-5000	NO	<6	3	NO	NO	NO	YES
normal	2.53	25.4	5.65	1.2	5.91	0.98	MALE	39	married	higher_education	5000to10000	NO	<6	4	NO	NO	NO	NO
normal	2.53	21.9	5.6	0.93	5.38	1.35	MALE	76	married	junior_high_school	3000-5000	NO	<6	3	NO	NO	NO	NO
normal	2.53	27	4.82	1.68	4.59	1.03	FEMALE	34	married	higher_education	3000-5000	NO	<6	4	NO	NO	NO	NO
normal	2.53	22.2	4.69	0.8	5.32	1.22	FEMALE	29	married	higher_education	3000-5000	NO	<6	4	NO	NO	NO	NO
normal	2.52	23.9	4.82	0.93	4.7	1.12	MALE	49	married	higher_education	3000-5000	NO	<6	4	NO	NO	NO	NO
normal	2.52	23	4.49	1	4.74	1.3	FEMALE	37	married	higher_education	3000-5000	NO	<6	3	NO	NO	NO	NO
normal	2.52	27.5	5.51	2.1	4.61	1.27	MALE	40	married	higher_education	3000-5000	NO	<6	4	NO	YES	NO	YES
normal	2.51	25.1	4.75	1.74	4.77	0.95	FEMALE	34	married	higher_education	3000-5000	NO	<6	5	NO	NO	NO	YES
normal	2.51	21.5	4.57	2.63	5.8	0.86	MALE	32	married	higher_education	3000-5000	NO	<6	4	NO	NO	NO	YES
normal	2.51	24.4	4.92	2.56	4.54	0.97	MALE	31	married	higher_education	5000to10000	NO	<6	3	YES	NO	NO	YES
normal	2.5	25.2	6.12	0.68	5.28	1.48	MALE	43	married	higher_education	3000-5000	NO	<6	3	YES	NO	NO	YES
normal	2.5	22.1	4.66	1.31	5.76	0.98	MALE	45	married	higher_education	3000-5000	YES	<6	4	YES	NO	NO	NO
normal	2.5	30.3	7.47	8.9	16.66	1.24	MALE	39	married	higher_education	3000-5000	YES	<6	4	NO	NO	YES	YES
normal	2.5	30.3	7.47	8.9	16.66	1.24	MALE	39	married	higher_education	3000-5000	YES	<6	4	NO	NO	YES	YES
normal	2.5	23.6	6.22	3.93	4.99	1.05	MALE	33	married	higher_education	3000-5000	NO	<6	4	NO	NO	NO	YES
normal	2.5	27.4	4.77	3.34	5.37	0.91	MALE	40	married	higher_education	3000-5000	NO	<6	4	NO	NO	NO	YES
normal	2.49	24.8	5.45	1.9	5.53	1.31	FEMALE	43	married	higher_education	3000-5000	NO	<6	3	NO	NO	NO	YES
normal	2.49	23.5	4.85	1.2	5.01	1.19	MALE	31	married	higher_education	3000-5000	YES	<6	3	YES	NO	NO	NO
normal	2.48	25.6	5.24	1.95	5.2	0.98	MALE	51	married	higher_education	3000-5000	YES	<6	4	YES	NO	NO	YES
normal	2.48	29.5	4.67	1.07	4.79	0.92	MALE	34	married	higher_education	3000-5000	NO	<6	3	NO	NO	NO	NO
normal	2.47	24.6	5.14	1.47	5.43	1.26	MALE	41	married	higher_education	3000-5000	NO	<6	4	NO	NO	NO	NO
normal	2.47	28.5	4.99	4.51	5.25	1.05	MALE	34	married	higher_education	5000to10000	NO	<6	4	YES	NO	NO	YES
normal	2.47	30.5	5.81	4.01	4.52	1.08	MALE	33	married	higher_education	3000-5000	NO	<6	4	NO	YES	NO	YES
normal	2.46	28.7	4.82	2.62	5	1.01	FEMALE	32	married	higher_education	3000-5000	NO	<6	4	NO	NO	NO	YES
normal	2.46	22.7	6.08	1.54	5.57	1.26	MALE	62	married	senior_high_school	3000-5000	NO	<6	2	YES	YES	NO	YES
normal	2.46	23.6	5.26	2.58	5	1.06	MALE	43	married	higher_education	1000-3000	YES	<6	4	YES	YES	NO	YES
normal	2.46	26.3	5.88	0.87	4.85	1.55	MALE	33	married	higher_education	1000-3000	NO	<6	3	YES	NO	NO	YES
normal	2.45	27.9	5.27	4.68	6.48	0.99	MALE	40	divorced	senior_high_school	3000-5000	NO	<6	2	NO	YES	NO	YES
normal	2.45	35.6	5.75	1.79	9.11	0.96	MALE	40	married	higher_education	3000-5000	NO	<6	4	YES	NO	NO	YES
normal	2.45	20.6	4.9	1.11	5.04	1.18	FEMALE	31	married	higher_education	3000-5000	NO	<6	4	NO	NO	NO	NO
normal	2.44	24.6	5.6	3.7	4.89	1.02	MALE	37	married	higher_education	3000-5000	YES	<6	4	NO	NO	NO	YES
normal	2.44	33	4.8	1.63	5.05	1.15	FEMALE	27	married	higher_education	3000-5000	NO	<6	4	NO	NO	NO	NO
normal	2.44	18.8	4.85	0.65	4.88	1.45	FEMALE	28	spinsterhood	higher_education	3000-5000	NO	<6	3	NO	NO	NO	NO
normal	2.43	26.9	5.47	1.92	5.71	1.16	MALE	41	married	higher_education	3000-5000	NO	<6	3	NO	NO	NO	YES
normal	2.43	23.5	5.2	1.08	4.89	1.58	MALE	38	married	higher_education	3000-5000	YES	<6	5	NO	NO	NO	NO
normal	2.43	23.7	5.26	2.91	5.1	1.37	MALE	34	married	higher_education	3000-5000	NO	<6	3	NO	NO	NO	YES
normal	2.43	27.8	5.37	3.27	5.47	0.97	FEMALE	34	married	higher_education	1000-3000	NO	<6	5	NO	NO	NO	YES
normal	2.43	21.1	5.08	0.98	4.96	1.35	FEMALE	36	married	higher_education	3000-5000	NO	<6	4	NO	NO	NO	NO
normal	2.43	18	5.3	0.85	4.96	1.87	FEMALE	26	married	higher_education	3000-5000	NO	<6	4	NO	NO	NO	NO
normal	2.42	29	5.04	2.72	4.84	1.09	MALE	38	married	higher_education	3000-5000	NO	<6	4	NO	YES	NO	YES
normal	2.42	23.3	5.05	2.76	4.77	1.14	MALE	33	married	higher_education	3000-5000	NO	<6	4	NO	YES	NO	YES
normal	2.42	23.6	4.48	1.53	4.61	0.87	FEMALE	32	married	higher_education	5000to10000	NO	<6	4	NO	NO	NO	NO
normal	2.42	23	4.72	1.46	4.2	1.06	FEMALE	42	married	higher_education	3000-5000	NO	<6	4	NO	NO	NO	NO
normal	2.42	20.6	5.22	1.05	4.71	1.3	FEMALE	28	spinsterhood	higher_education	3000-5000	NO	<6	4	NO	NO	NO	NO
normal	2.41	21.1	6.22	1.53	5.13	1.63	FEMALE	26	married	higher_education	3000-5000	NO	<6	4	NO	NO	NO	YES
normal	2.4	26.1	4.88	1.68	4.88	1.2	MALE	33	married	higher_education	3000-5000	NO	<6	4	NO	NO	NO	NO
normal	2.39	18.2	5.09	1.08	4.46	1.51	FEMALE	35	married	higher_education	3000-5000	NO	<6	2	NO	NO	NO	NO
normal	2.39	20	5.27	1	4.53	1.36	FEMALE	37	married	higher_education	3000-5000	NO	<6	4	NO	NO	NO	NO
normal	2.39	27.2	5.23	1.86	4.76	1.08	FEMALE	35	married	higher_education	3000-5000	NO	<6	4	NO	YES	NO	YES
normal	2.39	23.1	4.63	2.17	4.93	1.03	MALE	34	married	higher_education	3000-5000	NO	<6	4	NO	YES	NO	YES
normal	2.38	21.6	5.94	1.63	6.14	1.45	MALE	38	married	higher_education	3000-5000	NO	<6	3	YES	NO	NO	YES
normal	2.38	23.4	4.75	1.87	4.58	0.99	MALE	33	married	higher_education	3000-5000	Quitting	<6	4	NO	NO	NO	YES
normal	2.38	26.7	4.64	1.57	6.72	0.99	MALE	40	married	higher_education	3000-5000	Quitting	<6	4	NO	NO	YES	NO
normal	2.38	22.5	4.84	1.58	4.79	0.96	FEMALE	32	married	higher_education	3000-5000	NO	<6	4	NO	NO	NO	NO
normal	2.38	21.2	5.23	1.75	4.65	1.36	FEMALE	32	married	higher_education	3000-5000	NO	<6	4	NO	NO	NO	YES
normal	2.37	23.6	5.56	1.67	5.62	1.25	FEMALE	35	married	higher_education	3000-5000	NO	<6	4	NO	NO	NO	NO
normal	2.37	23.3	6.86	3.27	5.36	1.32	MALE	31	married	higher_education	3000-5000	NO	<6	4	NO	NO	NO	YES
normal	2.37	23	4.54	0.7	5	1.22	FEMALE	29	married	higher_education	3000-5000	NO	<6	4	NO	NO	NO	NO
normal	2.36	23.4	4.77	1.09	4.95	1.12	MALE	34	married	higher_education	3000-5000	NO	<6	5	NO	NO	NO	NO
normal	2.36	25.2	5.68	4.7	10.26	1.16	MALE	35	married	higher_education	3000-5000	YES	<6	4	NO	NO	NO	YES
normal	2.36	26.3	4.57	1.48	5.11	1	MALE	36	married	higher_education	3000-5000	YES	<6	4	YES	YES	NO	NO
normal	2.36	23.4	4.65	0.73	5.77	1.08	FEMALE	38	married	higher_education	3000-5000	NO	<6	4	NO	NO	NO	NO
normal	2.36	26.9	4.92	1.29	4.76	1.21	FEMALE	41	married	junior_high_school	1000-3000	NO	<6	3	NO	NO	NO	NO
normal	2.36	20.9	4.46	1.28	4.77	0.82	FEMALE	23	married	higher_education	3000-5000	NO	<6	4	NO	NO	NO	NO
normal	2.35	33.9	5.13	2.38	5.15	0.9	MALE	36	married	higher_education	3000-5000	NO	<6	3	NO	NO	NO	YES
normal	2.35	28.5	5.26	3.56	5.39	0.97	MALE	37	married	higher_education	3000-5000	YES	<6	4	YES	NO	NO	YES
normal	2.35	26.3	4.8	0.89	5.01	1.29	MALE	34	married	higher_education	3000-5000	NO	<6	3	NO	NO	NO	NO
normal	2.35	21	5.03	1.04	4.71	1.45	FEMALE	39	married	higher_education	3000-5000	NO	<6	4	NO	NO	NO	NO
normal	2.35	20.8	4.83	0.92	5.24	1.5	FEMALE	29	married	higher_education	3000-5000	NO	<6	3	NO	NO	NO	NO
normal	2.34	29.7	4.53	1.56	4.6	0.96	FEMALE	41	married	senior_high_school	3000-5000	NO	<6	5	NO	NO	NO	NO
normal	2.34	20.2	5.21	1.6	4.51	1.33	FEMALE	34	married	higher_education	3000-5000	NO	<6	4	NO	NO	NO	NO
normal	2.33	26.7	4.96	1.14	4.84	1.32	FEMALE	38	married	higher_education	1000-3000	NO	<6	3	NO	NO	NO	NO
normal	2.33	30	5.25	2.88	6.15	0.93	MALE	38	married	higher_education	3000-5000	YES	<6	4	YES	NO	NO	YES
normal	2.33	23	4.48	1.47	4.78	1.01	MALE	34	married	higher_education	3000-5000	NO	<6	4	NO	NO	NO	NO
normal	2.33	27.6	5.73	3.59	6.33	1.31	MALE	41	married	higher_education	3000-5000	YES	<6	3	YES	YES	NO	YES
normal	2.33	26.8	5.07	1.14	5.41	1	MALE	41	divorced	junior_high_school	3000-5000	NO	<6	5	NO	YES	NO	NO
normal	2.33	23.9	4.69	1.74	4.79	1.36	FEMALE	31	married	higher_education	3000-5000	NO	<6	5	NO	NO	NO	YES
normal	2.32	25.3	4.7	0.91	4.86	1.18	FEMALE	36	married	higher_education	3000-5000	NO	<6	4	NO	NO	NO	NO
normal	2.32	17.1	4.56	0.58	4.68	1.33	MALE	30	married	higher_education	3000-5000	YES	<6	5	NO	NO	NO	NO
normal	2.32	19.9	5.37	1.88	4.94	1.13	FEMALE	33	married	higher_education	3000-5000	NO	<6	5	NO	NO	NO	YES
normal	2.32	21.7	4.79	1.17	5.27	1.14	MALE	44	married	junior_high_school	3000-5000	NO	<6	2	NO	YES	NO	NO
normal	2.32	28.1	5.08	1.97	4.59	0.97	MALE	26	spinsterhood	higher_education	3000-5000	YES	<6	3	NO	NO	NO	YES
normal	2.32	17.9	4.77	0.89	4.6	1.35	FEMALE	37	married	higher_education	3000-5000	NO	<6	4	NO	NO	NO	NO
normal	2.31	20.1	4.92	0.61	4.58	1.36	FEMALE	42	married	junior_high_school	3000-5000	NO	<6	5	NO	NO	NO	NO
normal	2.31	26.3	4.31	1.53	5.67	0.92	MALE	47	married	senior_high_school	3000-5000	YES	<6	3	NO	NO	NO	YES
normal	2.31	17.8	5.42	0.76	4.76	1.87	FEMALE	33	married	higher_education	3000-5000	NO	<6	4	NO	NO	NO	NO
normal	2.31	19.4	5.06	1.44	4.57	1.36	FEMALE	35	married	higher_education	3000-5000	NO	<6	4	NO	NO	NO	NO
normal	2.31	28.9	4.45	1.84	5.57	0.9	MALE	27	married	higher_education	3000-5000	YES	<6	4	NO	NO	NO	YES
normal	2.31	25.4	5.33	1.42	5.91	1.2	FEMALE	33	married	higher_education	3000-5000	NO	<6	4	NO	NO	NO	NO
normal	2.3	23.6	4.82	2.18	7.2	0.92	MALE	48	married	higher_education	3000-5000	NO	<6	3	NO	NO	NO	YES
normal	2.3	28.2	4.66	2.4	5.07	1.12	MALE	41	married	higher_education	3000-5000	NO	<6	3	NO	YES	NO	YES
normal	2.3	22.7	5.06	1.48	5.03	1.16	MALE	26	spinsterhood	higher_education	3000-5000	NO	<6	5	NO	NO	NO	NO
normal	2.3	18.4	5.18	0.6	4.62	1.57	FEMALE	27	spinsterhood	higher_education	3000-5000	NO	<6	3	NO	NO	NO	NO
normal	2.3	30.7	5.28	1.86	4.45	0.91	MALE	21	spinsterhood	higher_education	3000-5000	NO	<6	4	NO	NO	NO	YES
normal	2.29	25.7	4.57	2.52	4.71	0.91	FEMALE	32	married	higher_education	3000-5000	NO	<6	3	NO	NO	NO	YES
normal	2.29	24.9	5.32	1.09	4.94	1.37	MALE	38	married	higher_education	3000-5000	NO	<6	3	YES	NO	NO	NO
normal	2.29	26	4.98	1.02	4.78	1.11	MALE	39	married	higher_education	>10000	NO	<6	4	YES	NO	NO	NO
normal	2.29	32.1	4.65	2.63	5.29	1.05	FEMALE	33	married	higher_education	3000-5000	NO	<6	5	NO	NO	NO	YES
normal	2.29	26.5	4.6	3.93	4.65	0.93	MALE	37	married	higher_education	3000-5000	YES	<6	2	YES	NO	NO	YES
normal	2.28	21.5	5.35	0.74	4.74	1.62	FEMALE	38	married	junior_high_school	3000-5000	NO	<6	2	NO	NO	NO	NO
normal	2.28	18.2	4.86	1.1	5.1	1.35	FEMALE	48	married	higher_education	3000-5000	NO	<6	3	NO	NO	NO	NO
normal	2.28	19.1	4.74	1.26	5	1.13	MALE	37	married	higher_education	3000-5000	NO	<6	4	NO	NO	NO	NO
normal	2.28	25.2	4.2	5.1	5.32	0.82	MALE	34	married	higher_education	3000-5000	NO	<6	4	YES	NO	NO	YES
normal	2.28	22	5.64	0.93	5.1	1.33	FEMALE	29	married	higher_education	3000-5000	NO	<6	4	NO	NO	NO	NO
normal	2.27	21.2	6.37	2.04	5.14	1.37	FEMALE	41	married	higher_education	3000-5000	NO	<6	3	NO	NO	NO	YES
normal	2.27	20.6	5.1	1.11	4.82	1.57	FEMALE	50	married	higher_education	3000-5000	NO	<6	4	NO	NO	NO	NO
normal	2.27	18.6	5.75	0.95	5.03	1.65	FEMALE	63	married	senior_high_school	1000-3000	NO	<6	4	NO	NO	NO	YES
normal	2.27	23.1	4.46	1.95	5.03	1.05	MALE	35	married	higher_education	3000-5000	Quitting	<6	4	NO	NO	NO	YES
normal	2.26	24.6	5.13	2.11	5.14	1.18	MALE	38	married	higher_education	3000-5000	YES	<6	3	NO	NO	NO	YES
normal	2.26	26.7	4.88	1.3	4.82	1.05	MALE	34	married	higher_education	3000-5000	NO	<6	4	YES	NO	NO	NO
normal	2.26	27.2	4.72	0.99	5.4	1.21	FEMALE	65	married	junior_high_school	3000-5000	NO	<6	2	NO	NO	NO	NO
normal	2.25	30.4	4.41	1.9	4.09	1.04	MALE	33	married	higher_education	3000-5000	NO	<6	3	NO	YES	NO	YES
normal	2.24	20.2	4.17	1.06	4.44	0.84	MALE	36	married	higher_education	3000-5000	NO	<6	5	NO	NO	NO	NO
normal	2.24	23	4.29	0.67	4.97	0.95	FEMALE	35	married	higher_education	3000-5000	NO	<6	5	NO	NO	NO	NO
normal	2.24	27.6	4.87	3.47	5.9	1.03	MALE	36	married	senior_high_school	3000-5000	YES	<6	3	NO	YES	NO	YES
normal	2.23	26.3	4.16	1.4	5.25	0.84	MALE	34	married	higher_education	3000-5000	YES	<6	3	NO	NO	NO	NO
normal	2.23	31.6	4.33	2.06	5.32	0.86	MALE	44	married	senior_high_school	3000-5000	YES	<6	2	NO	YES	NO	YES
normal	2.23	21.2	5.02	1.38	4.94	1.2	FEMALE	31	married	senior_high_school	3000-5000	NO	<6	3	NO	NO	NO	NO
normal	2.22	22.9	5.12	0.95	5.66	1.72	FEMALE	36	married	higher_education	3000-5000	NO	<6	3	NO	NO	NO	NO
normal	2.21	21.7	4.5	1.22	5.24	1.19	FEMALE	42	married	higher_education	3000-5000	NO	<6	4	NO	NO	NO	NO
normal	2.21	24.3	4.84	0.74	5.12	1.25	MALE	33	married	higher_education	3000-5000	NO	<6	4	NO	NO	NO	NO
normal	2.21	25.2	4.7	0.87	5.73	1.15	FEMALE	39	married	higher_education	1000-3000	NO	<6	3	NO	NO	NO	NO
normal	2.21	22	4.8	1.2	5.92	1.31	MALE	35	married	higher_education	3000-5000	YES	<6	4	NO	NO	NO	NO
normal	2.2	27.6	6.91	1.42	5.72	1.22	FEMALE	41	married	junior_high_school	3000-5000	NO	<6	4	NO	NO	NO	YES
normal	2.2	24.7	5.46	1.68	5.22	1.26	FEMALE	44	married	higher_education	3000-5000	NO	<6	4	NO	NO	NO	NO
normal	2.2	32.1	4.57	3.62	6.23	0.92	MALE	32	married	higher_education	3000-5000	YES	<6	4	NO	NO	NO	YES
normal	2.2	25.2	5.86	1.92	4.98	0.96	MALE	33	married	higher_education	3000-5000	YES	<6	3	NO	YES	NO	YES
normal	2.19	25.4	4.88	1.98	6.01	1.36	MALE	34	married	higher_education	3000-5000	YES	<6	4	NO	NO	NO	YES
normal	2.19	22.4	5.06	1.31	4.9	1.38	FEMALE	39	married	higher_education	3000-5000	NO	<6	4	NO	YES	NO	NO
normal	2.18	26.2	4.86	0.69	5.33	1.69	FEMALE	38	married	higher_education	3000-5000	NO	<6	4	NO	NO	NO	NO
normal	2.18	24.8	4.37	1.34	4.89	0.93	FEMALE	33	married	higher_education	3000-5000	NO	<6	4	NO	NO	NO	NO
normal	2.18	19.9	4.73	1.34	4.51	1.25	FEMALE	33	married	higher_education	5000to10000	NO	<6	4	NO	NO	NO	NO
normal	2.18	23.7	4.6	0.9	5.34	1.14	FEMALE	34	married	higher_education	3000-5000	NO	<6	4	NO	NO	NO	NO
normal	2.18	24.5	4.52	1.07	5.19	1.05	FEMALE	35	married	higher_education	3000-5000	NO	<6	3	NO	NO	NO	NO
normal	2.18	36.8	4.22	2.59	5.43	0.9	MALE	70	married	junior_high_school	3000-5000	Quitting	<6	2	NO	YES	NO	YES
normal	2.18	24.3	5.56	2.05	5.3	1.31	FEMALE	32	married	higher_education	3000-5000	NO	<6	4	NO	NO	NO	YES
normal	2.17	22.3	4.82	3.8	5.1	1.13	FEMALE	39	married	higher_education	3000-5000	NO	<6	3	NO	NO	NO	YES
normal	2.17	23.9	4.44	0.73	5.65	1.06	FEMALE	38	married	higher_education	3000-5000	NO	<6	3	NO	NO	NO	NO
normal	2.16	26.2	5.03	0.58	5.15	1.07	MALE	38	married	higher_education	3000-5000	NO	<6	4	NO	NO	NO	NO
normal	2.16	17.8	4.75	1.11	4.72	1.2	FEMALE	33	married	higher_education	3000-5000	NO	<6	4	NO	NO	NO	NO
normal	2.15	27	4.4	2.73	5.37	1.04	MALE	40	married	higher_education	3000-5000	YES	<6	3	NO	NO	NO	YES
normal	2.15	18.2	4.87	1.22	4.9	1.46	FEMALE	33	married	higher_education	3000-5000	NO	<6	4	NO	NO	NO	NO
normal	2.15	24.6	6.89	1.81	5.62	1.34	MALE	41	married	higher_education	3000-5000	NO	<6	4	NO	NO	NO	YES
normal	2.15	19.5	4.47	0.92	4.84	1.13	FEMALE	41	married	senior_high_school	3000-5000	NO	<6	3	NO	NO	NO	NO
normal	2.15	23.6	4.59	1.82	6	1.16	MALE	32	married	higher_education	3000-5000	NO	<6	4	NO	NO	NO	YES
normal	2.15	26.1	5.31	3.66	4.97	0.9	MALE	30	spinsterhood	higher_education	3000-5000	YES	<6	3	NO	NO	NO	YES
normal	2.14	18.3	4.87	1.08	5.05	1.72	FEMALE	42	married	higher_education	3000-5000	NO	<6	4	NO	NO	NO	NO
normal	2.14	20.9	4.99	1.09	4.98	1.57	FEMALE	41	married	higher_education	3000-5000	NO	<6	4	NO	NO	NO	NO
normal	2.14	23.2	5.05	1.01	4.93	1.41	MALE	36	married	higher_education	3000-5000	NO	<6	3	YES	NO	NO	NO
normal	2.14	17.4	5.3	1.25	5.1	1.29	FEMALE	40	married	higher_education	3000-5000	NO	<6	5	NO	NO	NO	NO
normal	2.14	31.7	6.33	7.33	5.7	1.1	MALE	41	married	higher_education	3000-5000	NO	<6	4	YES	YES	NO	YES
normal	2.14	23.1	4.95	0.73	4.38	1.54	FEMALE	33	married	higher_education	3000-5000	NO	<6	4	NO	NO	NO	NO
normal	2.13	23.6	4.57	0.83	5.03	1.26	MALE	35	married	higher_education	3000-5000	NO	<6	4	NO	NO	NO	NO
normal	2.13	21.6	4.58	0.65	4.55	1.27	FEMALE	33	married	higher_education	3000-5000	NO	<6	5	NO	NO	NO	NO
normal	2.13	22.9	4.22	0.97	5.78	1.11	FEMALE	44	married	higher_education	3000-5000	NO	<6	3	NO	NO	NO	NO
normal	2.13	31.9	4.05	1.27	5.38	0.76	MALE	38	married	higher_education	3000-5000	NO	<6	4	YES	NO	NO	NO
normal	2.13	23	5.88	3.67	4.92	1.06	MALE	33	married	junior_high_school	3000-5000	YES	<6	4	NO	NO	NO	YES
normal	2.13	19.3	4.57	0.4	4.43	1.3	FEMALE	31	married	higher_education	3000-5000	NO	<6	5	NO	NO	NO	NO
normal	2.13	20.2	5.2	0.99	5.37	1.62	FEMALE	34	married	higher_education	3000-5000	NO	<6	3	NO	NO	NO	NO
normal	2.13	25.2	4.72	2.92	5.85	0.97	MALE	31	married	senior_high_school	3000-5000	YES	<6	5	YES	NO	NO	YES
normal	2.12	23.4	4.36	1.69	4.68	0.95	FEMALE	36	married	higher_education	5000to10000	NO	<6	4	NO	NO	NO	NO
normal	2.12	22	6.68	0.6	5.05	2.25	FEMALE	36	married	higher_education	3000-5000	NO	<6	4	NO	NO	NO	YES
normal	2.12	24.4	4.35	1.01	5.25	0.99	MALE	32	married	higher_education	3000-5000	NO	<6	4	NO	NO	NO	NO
normal	2.12	21.5	4.61	1.89	5.34	1.12	FEMALE	32	married	higher_education	3000-5000	NO	<6	4	NO	NO	NO	YES
normal	2.12	26	4.55	1.36	5.11	1.17	MALE	29	married	higher_education	3000-5000	NO	<6	4	YES	NO	NO	NO
normal	2.12	31.5	5.05	1.5	5.44	1.2	MALE	35	married	higher_education	3000-5000	NO	<6	5	NO	NO	NO	NO
normal	2.11	28.8	4.12	2.76	6.03	0.86	MALE	43	married	higher_education	3000-5000	YES	<6	4	YES	YES	NO	YES
normal	2.11	21.2	4.75	1.43	5.46	1.09	MALE	33	married	higher_education	3000-5000	NO	<6	4	YES	YES	NO	NO
normal	2.11	24.2	5.32	0.53	4.49	1.6	FEMALE	39	married	higher_education	3000-5000	NO	<6	3	NO	NO	NO	NO
normal	2.11	17.9	4.94	0.45	4.97	1.78	FEMALE	33	married	higher_education	3000-5000	NO	<6	5	NO	NO	NO	NO
normal	2.1	22.4	4.57	1.43	5.21	1.32	FEMALE	36	married	higher_education	3000-5000	NO	<6	4	NO	NO	NO	NO
normal	2.1	24	3.93	1.68	5.74	0.81	MALE	35	married	higher_education	3000-5000	NO	<6	4	NO	NO	NO	NO
normal	2.09	25.6	5.03	0.83	4.89	1.22	FEMALE	40	married	higher_education	3000-5000	NO	<6	3	NO	NO	NO	NO
normal	2.09	29.8	4.48	4.02	5.54	0.85	MALE	33	married	higher_education	3000-5000	YES	<6	4	NO	YES	NO	YES
normal	2.09	25.4	3.88	0.76	5.26	0.86	FEMALE	34	married	higher_education	3000-5000	NO	<6	3	NO	NO	NO	NO
normal	2.09	23.7	5.03	1.5	4.94	1.38	FEMALE	34	married	senior_high_school	3000-5000	NO	<6	3	NO	NO	NO	NO
normal	2.09	21.4	4.63	0.5	5.35	1.42	FEMALE	29	married	higher_education	3000-5000	NO	<6	5	NO	NO	NO	NO
normal	2.09	25.6	5.17	2	5.33	1.16	FEMALE	34	married	higher_education	3000-5000	NO	<6	4	NO	NO	NO	YES
normal	2.09	27.1	5.22	2.28	5.8	1.04	MALE	53	married	junior_high_school	3000-5000	Quitting	<6	2	NO	YES	NO	YES
normal	2.08	20.9	4.23	1.37	4.5	1.01	MALE	34	married	higher_education	3000-5000	NO	<6	2	YES	NO	NO	NO
normal	2.08	26.5	5.25	0.89	5.43	1.31	MALE	38	married	higher_education	3000-5000	NO	<6	4	YES	NO	NO	NO
normal	2.08	23.2	4.33	0.86	4.51	1.15	FEMALE	34	married	higher_education	3000-5000	NO	<6	4	NO	NO	NO	NO
normal	2.08	20.5	5.01	1.36	4.92	1.02	FEMALE	32	married	higher_education	3000-5000	NO	<6	5	NO	YES	NO	NO
normal	2.07	29.3	5.36	1.07	5.41	1.12	MALE	43	married	higher_education	3000-5000	NO	<6	4	YES	NO	NO	NO
normal	2.07	27.8	4.79	1.9	5.34	0.91	MALE	38	married	higher_education	3000-5000	NO	<6	3	NO	NO	NO	YES
normal	2.07	24.8	4.53	0.78	5.28	1.42	MALE	51	married	higher_education	3000-5000	YES	<6	3	NO	NO	NO	NO
normal	2.07	31.3	4.9	1.69	5.87	0.97	MALE	28	spinsterhood	higher_education	3000-5000	YES	<6	3	NO	NO	NO	NO
normal	2.07	25.7	4.36	3.82	4.81	0.96	FEMALE	30	married	higher_education	3000-5000	NO	<6	4	NO	NO	NO	YES
normal	2.07	23.9	4.4	1.17	4.72	1.28	MALE	26	spinsterhood	higher_education	3000-5000	NO	<6	5	NO	NO	NO	NO
normal	2.06	24.1	4.17	1.04	5.53	0.89	FEMALE	37	married	higher_education	3000-5000	NO	<6	4	NO	NO	NO	NO
normal	2.05	23	4	1.14	5.07	0.92	FEMALE	43	married	higher_education	3000-5000	NO	<6	4	NO	NO	NO	NO
normal	2.05	31.6	4.86	1.69	4.6	1.23	FEMALE	35	married	higher_education	3000-5000	NO	<6	4	NO	YES	NO	NO
normal	2.05	32.5	5.59	1.72	6.31	0.96	MALE	36	married	higher_education	3000-5000	NO	<6	4	NO	NO	NO	YES
normal	2.05	22.9	4.25	1.4	5.88	0.99	MALE	35	married	higher_education	3000-5000	YES	<6	4	YES	NO	NO	NO
normal	2.05	22.3	4.82	1.67	5.58	1.21	FEMALE	33	married	higher_education	3000-5000	NO	<6	3	NO	NO	NO	NO
normal	2.05	17.4	5.56	0.76	5.07	1.86	FEMALE	36	married	higher_education	1000-3000	NO	<6	5	NO	NO	NO	NO
normal	2.05	20.8	5.55	1.23	5.02	1.2	MALE	23	married	higher_education	3000-5000	NO	<6	3	NO	NO	NO	NO
normal	2.04	21.6	4.52	0.77	4.09	1.18	FEMALE	38	married	higher_education	3000-5000	NO	<6	4	NO	NO	NO	NO
normal	2.04	19.8	6.23	2.31	5.23	1.52	FEMALE	44	married	senior_high_school	3000-5000	NO	<6	4	NO	NO	NO	YES
normal	2.04	21.7	3.97	2.93	4.67	0.79	MALE	37	married	higher_education	3000-5000	NO	<6	3	NO	YES	NO	YES
normal	2.04	30.5	4.92	4.42	5.9	0.93	MALE	32	married	higher_education	3000-5000	YES	<6	5	NO	YES	NO	YES
normal	2.03	17.6	5.21	1.1	5.05	1.43	MALE	33	married	higher_education	3000-5000	NO	<6	4	YES	NO	NO	NO
normal	2.03	26.1	5.31	0.69	5.53	1.27	MALE	28	married	higher_education	3000-5000	NO	<6	4	NO	NO	NO	NO
normal	2.02	22.5	4.28	4.81	4.79	0.9	MALE	32	married	higher_education	3000-5000	YES	<6	3	YES	NO	NO	YES
normal	2.02	19	4.49	1.2	5.17	1.34	FEMALE	35	married	higher_education	3000-5000	NO	<6	4	NO	YES	NO	NO
normal	2.02	21.9	5	0.6	4.73	1.14	MALE	26	married	higher_education	3000-5000	NO	<6	4	NO	NO	NO	NO
normal	2.01	19.8	4.64	1.06	5.1	1.56	FEMALE	27	married	higher_education	3000-5000	NO	<6	4	NO	NO	NO	NO
normal	2.01	19.8	4.64	1.06	5.1	1.56	FEMALE	27	married	higher_education	3000-5000	NO	<6	4	NO	NO	NO	NO
normal	2.01	27.3	5.92	1.72	4.29	1.88	FEMALE	43	married	higher_education	3000-5000	NO	<6	2	NO	NO	NO	YES
normal	2.01	22.6	4.22	2.07	5.06	1.06	MALE	32	married	higher_education	3000-5000	YES	<6	4	YES	NO	NO	YES
normal	2.01	20.1	4.81	0.88	5.54	1.65	FEMALE	32	married	higher_education	3000-5000	NO	<6	4	NO	NO	NO	NO
normal	2.01	24.8	6.03	5.01	13.11	1.12	FEMALE	26	married	higher_education	3000-5000	NO	<6	4	NO	NO	YES	YES
normal	2	23.2	4.65	0.87	4.63	1.46	FEMALE	43	married	higher_education	3000-5000	NO	<6	5	NO	NO	NO	NO
normal	2	21.8	5.03	1.5	5.46	1.06	MALE	36	married	higher_education	3000-5000	YES	<6	4	NO	NO	NO	NO
normal	2	27.7	4.89	4.9	10.56	1	FEMALE	61	married	primary_school	1000-3000	NO	<6	3	NO	YES	YES	YES
normal	2	20.2	4.82	0.68	4.74	1.75	FEMALE	39	married	higher_education	3000-5000	NO	<6	3	NO	NO	NO	NO
normal	2	20.1	4.42	0.96	4.9	1.39	FEMALE	33	married	higher_education	3000-5000	NO	<6	4	NO	NO	NO	NO
normal	2	23.7	4.65	0.7	4.88	1.39	MALE	31	married	higher_education	3000-5000	NO	<6	3	NO	NO	NO	NO
normal	2	28.9	5.81	2.72	4.61	1.2	MALE	33	married	higher_education	3000-5000	NO	<6	3	NO	NO	NO	YES
normal	1.99	21.2	4.59	1	4.81	1.44	FEMALE	32	married	higher_education	3000-5000	NO	<6	4	NO	NO	NO	NO
normal	1.99	27.6	4.62	0.95	4.58	1.14	FEMALE	33	married	higher_education	3000-5000	NO	<6	3	NO	NO	NO	NO
normal	1.99	26.8	4.35	1.38	4.8	1.06	MALE	30	married	higher_education	3000-5000	NO	<6	4	NO	NO	NO	NO
normal	1.99	19.6	5.66	0.88	5.42	1.42	FEMALE	27	spinsterhood	higher_education	3000-5000	NO	<6	4	NO	NO	NO	NO
normal	1.99	21.9	5.33	0.74	4.65	1.67	FEMALE	29	married	higher_education	3000-5000	NO	<6	4	NO	NO	NO	NO
normal	1.99	21.2	4.3	1.13	5.14	0.95	FEMALE	35	married	higher_education	3000-5000	NO	<6	4	NO	NO	NO	NO
normal	1.98	19.7	4.97	0.78	4.69	1.82	FEMALE	38	married	higher_education	5000to10000	NO	<6	3	NO	NO	NO	NO
normal	1.98	25.5	4.81	0.89	4.5	1.65	FEMALE	38	married	higher_education	5000to10000	NO	<6	4	NO	NO	NO	NO
normal	1.98	25.8	5.5	1.51	4.59	1.18	MALE	40	married	senior_high_school	1000-3000	YES	<6	4	NO	NO	NO	NO
normal	1.98	21.4	4.27	1.13	4.32	1.06	FEMALE	35	married	higher_education	3000-5000	NO	<6	3	NO	NO	NO	NO
normal	1.98	25.3	4.64	1.36	5.24	1.55	FEMALE	35	married	higher_education	3000-5000	NO	<6	4	NO	NO	NO	NO
normal	1.98	23.7	5.37	3.16	5.27	1.07	MALE	39	married	higher_education	3000-5000	NO	<6	4	NO	NO	NO	YES
normal	1.98	24	4.32	1.54	5.3	1.17	FEMALE	39	married	higher_education	3000-5000	NO	<6	4	NO	NO	NO	NO
normal	1.97	23	6.02	1.38	4.9	1.7	FEMALE	32	married	higher_education	3000-5000	NO	<6	5	NO	NO	NO	YES
normal	1.97	25.8	4.06	1.19	4.95	0.98	FEMALE	32	married	higher_education	3000-5000	NO	<6	3	NO	NO	NO	NO
normal	1.97	22.4	5.45	0.98	4.45	1.21	FEMALE	35	married	higher_education	3000-5000	NO	<6	3	NO	NO	NO	NO
normal	1.97	24	6.09	1.17	4.65	1.37	MALE	40	married	higher_education	3000-5000	NO	<6	4	NO	NO	NO	YES
normal	1.97	25.1	4.32	1.03	4.96	1.25	FEMALE	33	married	higher_education	3000-5000	NO	<6	5	NO	NO	NO	NO
normal	1.97	25	4.41	1.07	5.05	1.13	MALE	34	married	higher_education	3000-5000	NO	<6	4	NO	NO	NO	NO
normal	1.96	20.1	5.21	1.16	5.16	1.59	FEMALE	37	married	higher_education	3000-5000	NO	<6	4	NO	NO	NO	NO
normal	1.96	19.5	4.21	1.11	5.09	1.05	FEMALE	31	married	higher_education	3000-5000	NO	<6	4	NO	NO	NO	NO
normal	1.95	18.7	4.88	0.85	4.93	1.63	FEMALE	43	married	higher_education	3000-5000	NO	<6	2	NO	NO	NO	NO
normal	1.95	24.9	5.49	2.02	6.06	1.18	FEMALE	43	married	higher_education	3000-5000	NO	<6	4	NO	NO	NO	YES
normal	1.95	23.5	4.57	2.08	4.87	0.82	MALE	36	married	higher_education	3000-5000	NO	<6	4	NO	NO	NO	YES
normal	1.95	20	4.25	1.58	4.7	1.25	FEMALE	33	married	higher_education	3000-5000	NO	<6	5	NO	NO	NO	NO
normal	1.95	24.7	5.1	0.74	4.91	1.12	MALE	31	married	higher_education	3000-5000	NO	<6	5	NO	NO	NO	NO
normal	1.95	29.3	3.87	1.3	4.62	0.94	FEMALE	30	married	higher_education	5000to10000	NO	<6	5	NO	NO	NO	NO
normal	1.95	29.3	4.54	0.87	5.36	1.51	MALE	27	married	higher_education	3000-5000	NO	<6	4	NO	YES	NO	NO
normal	1.95	20.5	4.98	1.05	4.92	1.45	FEMALE	22	spinsterhood	higher_education	1000-3000	NO	<6	4	NO	NO	NO	NO
normal	1.95	19.8	4.72	0.62	4.65	1.39	FEMALE	28	spinsterhood	higher_education	1000-3000	NO	<6	4	NO	NO	NO	NO
normal	1.94	20.6	4.62	0.74	4.77	1.48	FEMALE	51	married	higher_education	3000-5000	NO	<6	2	NO	NO	NO	NO
normal	1.94	28.8	5.25	1.86	6.1	1.14	MALE	34	married	higher_education	3000-5000	YES	<6	4	NO	YES	NO	YES
normal	1.94	27	5.28	1.06	5.48	1.48	FEMALE	56	married	higher_education	3000-5000	NO	<6	3	NO	NO	NO	NO
normal	1.94	29.3	5.31	1.6	4.76	1.66	FEMALE	31	married	higher_education	5000to10000	NO	<6	4	NO	NO	NO	NO
normal	1.93	17.4	4.9	0.71	4.62	1.89	FEMALE	36	married	higher_education	3000-5000	NO	<6	4	NO	NO	NO	NO
normal	1.93	25.5	5.87	1.75	5.17	1.28	MALE	34	divorced	higher_education	3000-5000	NO	<6	4	NO	YES	NO	YES
normal	1.93	26	4.96	2.51	4.85	1.05	MALE	35	married	higher_education	3000-5000	NO	<6	5	YES	YES	NO	YES
normal	1.93	24.1	4.59	0.61	5.19	1.39	MALE	33	married	higher_education	3000-5000	NO	<6	4	NO	NO	NO	NO
normal	1.93	21.5	5.55	0.6	4.6	1.4	FEMALE	44	married	senior_high_school	1000-3000	NO	<6	4	NO	NO	NO	NO
normal	1.93	23.9	4.27	1.15	4.44	1.06	MALE	40	married	higher_education	3000-5000	NO	<6	4	NO	YES	NO	NO
normal	1.93	21.2	4.12	0.62	5.48	1.13	FEMALE	32	married	higher_education	3000-5000	NO	<6	3	NO	NO	NO	NO
normal	1.93	23.4	5.12	1.18	4.57	1.29	MALE	32	married	higher_education	3000-5000	NO	<6	4	NO	YES	NO	NO
normal	1.93	19.3	4.75	1.05	4.8	1.8	FEMALE	31	married	higher_education	3000-5000	NO	<6	4	NO	NO	NO	NO
normal	1.93	23.4	4.79	1.18	4.78	1.05	MALE	36	married	senior_high_school	3000-5000	YES	<6	4	NO	NO	NO	NO
normal	1.92	24.4	4.99	1.45	4.88	1.36	FEMALE	33	married	higher_education	3000-5000	NO	<6	4	NO	NO	NO	NO
normal	1.92	27.1	4.52	2.77	5.46	0.99	MALE	41	married	higher_education	3000-5000	NO	<6	4	NO	NO	NO	YES
normal	1.92	24.2	4.26	0.76	5.15	0.98	FEMALE	37	married	senior_high_school	3000-5000	NO	<6	3	NO	NO	NO	NO
normal	1.92	22.8	3.87	1.86	4.75	1.02	FEMALE	26	spinsterhood	higher_education	3000-5000	NO	<6	4	NO	NO	NO	YES
normal	1.92	22	4.31	1.1	4.52	1.15	FEMALE	37	married	higher_education	3000-5000	NO	<6	4	NO	NO	NO	NO
normal	1.91	20.6	4.52	0.66	4.48	1.46	FEMALE	34	married	higher_education	3000-5000	NO	<6	4	NO	NO	NO	NO
normal	1.9	21.7	4.94	1.04	4.51	1.32	MALE	36	married	higher_education	3000-5000	NO	<6	4	NO	NO	NO	NO
normal	1.9	21.1	4.05	1.36	4.81	1.06	FEMALE	31	married	higher_education	3000-5000	NO	<6	4	NO	NO	NO	NO
normal	1.9	22.5	4.03	0.98	4.63	1.16	FEMALE	27	spinsterhood	higher_education	3000-5000	NO	<6	4	NO	NO	NO	NO
normal	1.89	30	4.17	2.35	5.18	0.89	MALE	33	married	higher_education	1000-3000	NO	<6	3	YES	YES	NO	YES
normal	1.89	25.8	4.05	1.7	4.42	1	FEMALE	43	married	higher_education	3000-5000	NO	<6	4	NO	YES	NO	YES
normal	1.89	22.4	5.83	0.73	4.91	1.61	FEMALE	39	married	higher_education	3000-5000	NO	<6	3	NO	NO	NO	YES
normal	1.89	27.9	4.28	5.5	6.09	0.85	MALE	39	married	higher_education	3000-5000	NO	<6	4	NO	NO	NO	YES
normal	1.89	19.7	3.95	1.53	4.26	1.03	FEMALE	36	married	higher_education	3000-5000	NO	<6	3	NO	NO	NO	NO
normal	1.89	27	5.56	0.61	5.1	1.81	FEMALE	40	married	higher_education	3000-5000	NO	<6	3	NO	NO	NO	NO
normal	1.89	21	4.5	0.68	5.27	1.58	FEMALE	37	married	higher_education	3000-5000	NO	<6	4	NO	NO	NO	NO
normal	1.89	23.3	4.23	0.74	5.22	1.44	FEMALE	31	married	higher_education	3000-5000	NO	<6	5	NO	NO	NO	NO
normal	1.89	28	5.02	1.17	4.72	1.18	MALE	28	married	higher_education	3000-5000	NO	<6	3	NO	NO	NO	NO
normal	1.89	19.4	4.21	1.01	4.91	1.21	FEMALE	26	spinsterhood	higher_education	3000-5000	NO	<6	4	NO	NO	NO	NO
normal	1.88	22.5	4.44	1.44	4.73	1.26	FEMALE	53	married	junior_high_school	3000-5000	NO	<6	3	NO	NO	NO	NO
normal	1.88	21.8	4.3	0.72	4.62	1.15	FEMALE	38	married	higher_education	3000-5000	NO	<6	4	NO	NO	NO	NO
normal	1.88	31.2	3.83	1.93	5.13	0.81	MALE	35	married	higher_education	3000-5000	NO	<6	4	NO	NO	NO	YES
normal	1.88	20.6	4.51	0.86	4.35	1.3	FEMALE	28	married	higher_education	3000-5000	NO	<6	3	NO	NO	NO	NO
normal	1.88	20.8	4.41	0.71	3.94	1.44	FEMALE	28	married	higher_education	3000-5000	NO	<6	4	NO	NO	NO	NO
normal	1.87	20.4	5.43	1.15	4.34	1.56	FEMALE	34	married	higher_education	3000-5000	NO	<6	4	NO	NO	NO	NO
normal	1.86	21.8	4.47	1.2	5.47	1.31	FEMALE	38	married	higher_education	3000-5000	NO	<6	4	NO	NO	NO	NO
normal	1.86	22.7	4.5	0.81	5.55	1.01	MALE	35	married	higher_education	3000-5000	NO	<6	4	NO	NO	NO	NO
normal	1.86	23.1	5.29	0.81	5.18	1.29	FEMALE	33	married	higher_education	3000-5000	NO	<6	4	NO	NO	NO	NO
normal	1.86	27	4.11	1.32	4.91	1.17	FEMALE	33	married	higher_education	3000-5000	NO	<6	3	NO	NO	NO	NO
normal	1.86	17.8	5.45	0.63	4.9	1.6	FEMALE	36	married	higher_education	3000-5000	NO	<6	3	NO	NO	NO	NO
normal	1.86	32.6	4.99	5.58	4.84	0.94	MALE	30	married	higher_education	3000-5000	NO	<6	5	NO	NO	NO	YES
normal	1.85	26.6	4.56	2.83	5.22	1.07	MALE	35	married	higher_education	3000-5000	NO	<6	4	NO	NO	NO	YES
normal	1.85	21.7	5.27	0.58	5.34	1.52	FEMALE	44	married	higher_education	3000-5000	NO	<6	3	NO	NO	NO	NO
normal	1.85	25.8	5.02	1.69	4.72	1.18	MALE	38	married	higher_education	3000-5000	NO	<6	3	NO	NO	NO	NO
normal	1.85	24.1	4.12	1.2	4.71	1.21	MALE	36	married	higher_education	3000-5000	NO	<6	4	NO	YES	NO	NO
normal	1.85	18.3	3.86	0.67	4.44	1.11	FEMALE	37	married	higher_education	5000to10000	NO	<6	3	NO	NO	NO	NO
normal	1.85	19.3	5.45	1.62	5.2	1.45	FEMALE	32	married	higher_education	5000to10000	NO	<6	4	NO	NO	NO	NO
normal	1.85	20.1	4.88	1.6	4.54	1.36	FEMALE	25	spinsterhood	higher_education	1000-3000	NO	<6	4	NO	NO	NO	NO
normal	1.84	27.5	4.26	4.88	5.47	0.88	MALE	34	married	higher_education	3000-5000	NO	<6	5	NO	NO	NO	YES
normal	1.84	25.3	4.12	2.53	5.27	0.82	MALE	38	married	higher_education	3000-5000	NO	<6	4	NO	NO	NO	YES
normal	1.84	28.3	4.46	3.91	6.19	0.92	MALE	42	married	senior_high_school	3000-5000	NO	<6	3	YES	YES	NO	YES
normal	1.84	22.2	4.16	2.03	4.71	1.04	FEMALE	34	married	higher_education	3000-5000	NO	<6	4	NO	NO	NO	YES
normal	1.83	29.4	4.91	2.68	5.97	0.86	MALE	45	married	junior_high_school	3000-5000	YES	<6	3	YES	NO	NO	YES
normal	1.82	25.2	4.36	1.27	5.47	1.21	FEMALE	33	married	higher_education	3000-5000	NO	<6	4	NO	NO	NO	NO
normal	1.82	22.5	4	0.8	5.03	1.2	FEMALE	36	married	higher_education	3000-5000	NO	<6	5	NO	NO	NO	NO
normal	1.82	29	5.64	3.42	6.41	1.12	MALE	37	married	higher_education	3000-5000	NO	<6	2	YES	YES	NO	YES
normal	1.82	22.1	5.29	1.85	6.11	1.12	FEMALE	30	married	higher_education	3000-5000	NO	<6	3	NO	NO	NO	YES
normal	1.82	24.4	3.94	0.74	4.92	1.12	FEMALE	33	married	higher_education	3000-5000	NO	<6	4	NO	NO	NO	NO
normal	1.81	22.7	4.95	1.14	5.73	1.33	FEMALE	49	married	higher_education	3000-5000	NO	<6	4	NO	NO	NO	NO
normal	1.81	18.9	4.91	0.73	4.66	1.79	FEMALE	38	married	higher_education	3000-5000	NO	<6	4	NO	NO	NO	NO
normal	1.81	23.5	5.21	0.77	5.97	1.44	FEMALE	41	married	senior_high_school	3000-5000	NO	<6	5	NO	YES	NO	NO
normal	1.81	25.3	3.84	0.89	4.72	1.17	FEMALE	32	married	higher_education	3000-5000	NO	<6	4	NO	NO	NO	NO
normal	1.81	30.6	4.12	1.12	5.67	0.98	FEMALE	35	married	higher_education	3000-5000	NO	<6	5	NO	YES	NO	NO
normal	1.81	21	4.23	1.79	4.45	1.25	FEMALE	34	married	higher_education	3000-5000	NO	<6	5	NO	NO	NO	YES
normal	1.8	24.2	4.8	1.3	8.13	1.06	FEMALE	26	married	higher_education	3000-5000	NO	<6	5	NO	NO	NO	NO
normal	1.79	20.1	4.32	0.76	5.09	1.56	FEMALE	45	married	higher_education	3000-5000	NO	<6	4	NO	NO	NO	NO
normal	1.78	21.4	4.68	0.81	4.95	1.46	FEMALE	43	married	higher_education	3000-5000	NO	<6	4	NO	NO	NO	NO
normal	1.78	19.8	6.38	0.89	4.76	1.8	FEMALE	56	married	senior_high_school	1000-3000	NO	<6	3	NO	NO	NO	YES
normal	1.77	25.4	5.66	2.19	4.61	1.56	FEMALE	42	married	senior_high_school	3000-5000	NO	<6	4	NO	NO	NO	YES
normal	1.77	23.3	3.72	1.69	4.8	0.92	MALE	39	married	higher_education	3000-5000	NO	<6	3	NO	NO	NO	NO
normal	1.77	29.5	4.32	1.15	4.82	1.05	MALE	37	married	higher_education	3000-5000	NO	<6	4	NO	NO	NO	NO
normal	1.77	22	5.02	1.61	5.07	1.46	FEMALE	41	married	higher_education	3000-5000	NO	<6	4	NO	NO	NO	NO
normal	1.77	23.6	4.9	1.4	5.56	1.11	FEMALE	28	married	senior_high_school	3000-5000	NO	<6	4	NO	NO	NO	NO
normal	1.77	27.5	4.48	3.02	5.85	0.94	MALE	34	married	higher_education	3000-5000	NO	<6	4	NO	NO	NO	YES
normal	1.76	23.7	6.17	2.9	4.98	1.19	MALE	39	married	higher_education	3000-5000	NO	<6	4	NO	NO	NO	YES
normal	1.76	33.9	6.27	2.79	5.2	1.14	MALE	33	married	higher_education	3000-5000	YES	<6	4	NO	NO	NO	YES
normal	1.76	22.1	5.05	0.98	5.05	1.28	MALE	70	married	higher_education	3000-5000	YES	<6	4	YES	NO	NO	NO
normal	1.76	25.2	4.17	0.77	5.59	0.99	MALE	33	married	higher_education	3000-5000	NO	<6	5	NO	NO	NO	NO
normal	1.76	23.3	4.18	2.3	8.98	0.87	FEMALE	28	married	higher_education	3000-5000	NO	<6	4	NO	NO	NO	YES
normal	1.76	21.2	4.7	1.21	4.99	1.21	FEMALE	30	married	higher_education	5000to10000	NO	<6	4	NO	NO	NO	NO
normal	1.75	23.6	3.85	0.54	5.33	1.06	FEMALE	37	married	higher_education	3000-5000	NO	<6	4	NO	NO	NO	NO
normal	1.75	23.6	4.28	0.94	5.23	1.51	FEMALE	37	married	higher_education	3000-5000	NO	<6	4	NO	NO	NO	NO
normal	1.75	19.1	5.96	1.61	5.13	1.43	MALE	44	married	junior_high_school	3000-5000	YES	<6	4	YES	NO	NO	YES
normal	1.75	21.5	4.08	1.23	5.69	0.83	MALE	39	married	higher_education	3000-5000	NO	<6	3	NO	NO	NO	NO
normal	1.75	20.4	4.4	0.89	4.54	1.4	FEMALE	32	married	higher_education	3000-5000	NO	<6	5	NO	NO	NO	NO
normal	1.75	28.7	4.69	0.94	5.31	1.16	FEMALE	26	married	higher_education	1000-3000	NO	<6	3	NO	NO	NO	NO
normal	1.75	22.8	4.17	1.4	4.78	1.44	FEMALE	26	spinsterhood	higher_education	3000-5000	NO	<6	4	NO	NO	NO	NO
normal	1.75	21.7	4.95	0.45	5.05	1.64	FEMALE	28	married	senior_high_school	3000-5000	NO	<6	4	NO	NO	NO	NO
normal	1.74	19.7	4.62	1.38	5.28	1.18	FEMALE	34	married	higher_education	3000-5000	NO	<6	4	NO	NO	NO	NO
normal	1.74	23.6	4.29	1.27	4.19	0.86	MALE	34	married	higher_education	3000-5000	NO	<6	4	NO	NO	NO	NO
normal	1.73	29.4	3.83	2.37	4.93	0.9	FEMALE	40	married	higher_education	3000-5000	NO	<6	4	NO	NO	NO	YES
normal	1.73	23.1	4.78	1.72	5.45	1.21	MALE	30	spinsterhood	higher_education	3000-5000	YES	<6	4	NO	NO	NO	YES
normal	1.73	24.3	4.78	1.58	5.26	1.02	MALE	33	married	higher_education	3000-5000	NO	<6	4	NO	NO	NO	NO
normal	1.73	19	4.47	1.09	4.31	1.44	FEMALE	29	married	higher_education	3000-5000	NO	<6	4	NO	NO	NO	NO
normal	1.72	26.4	3.59	0.99	4.79	0.9	MALE	44	married	higher_education	3000-5000	NO	<6	3	NO	NO	NO	NO
normal	1.72	19	4.14	0.49	4.85	1.36	FEMALE	38	married	higher_education	5000to10000	NO	<6	3	NO	NO	NO	NO
normal	1.72	24.8	5.16	1.06	5.11	1.23	FEMALE	33	married	higher_education	1000-3000	NO	<6	3	NO	NO	NO	NO
normal	1.72	23	4.57	1.03	4.79	1.29	FEMALE	30	married	higher_education	3000-5000	NO	<6	4	NO	NO	NO	NO
normal	1.71	29.2	4.08	1.76	5.11	0.88	MALE	41	married	higher_education	3000-5000	NO	<6	4	NO	NO	NO	YES
normal	1.71	22.4	4.08	0.68	4.52	1.34	FEMALE	42	married	senior_high_school	3000-5000	NO	<6	4	NO	NO	NO	NO
normal	1.71	20.9	3.77	2.33	5.07	0.87	FEMALE	36	married	higher_education	>10000	NO	<6	4	NO	NO	NO	YES
normal	1.71	32.4	5.97	1.75	6.25	1.6	FEMALE	50	married	senior_high_school	3000-5000	NO	<6	3	NO	YES	NO	YES
normal	1.71	18.1	3.92	0.8	4.91	1.18	FEMALE	25	married	higher_education	3000-5000	NO	<6	3	NO	NO	NO	NO
normal	1.7	20.5	4.82	0.59	5.12	1.58	FEMALE	35	married	higher_education	3000-5000	NO	<6	5	NO	NO	NO	NO
normal	1.7	28.5	4.13	2.5	4.68	0.95	MALE	37	married	higher_education	3000-5000	NO	<6	4	NO	NO	NO	YES
normal	1.7	20.7	3.81	0.48	5.24	1.16	FEMALE	36	married	senior_high_school	3000-5000	NO	<6	4	NO	NO	NO	NO
normal	1.7	18.6	4.04	1.12	4.49	1.19	FEMALE	37	married	higher_education	3000-5000	NO	<6	3	NO	NO	NO	NO
normal	1.69	25.1	4.32	1.44	5.54	1.2	FEMALE	35	married	higher_education	3000-5000	NO	<6	3	NO	NO	NO	NO
normal	1.69	27.1	4.58	1.59	4.86	1.02	MALE	33	married	higher_education	3000-5000	NO	<6	4	NO	NO	NO	NO
normal	1.69	16.2	4.33	0.56	4.79	1.49	FEMALE	31	married	higher_education	3000-5000	NO	<6	4	NO	NO	NO	NO
normal	1.69	28.4	4.29	0.95	5.59	0.96	FEMALE	30	spinsterhood	higher_education	3000-5000	NO	<6	4	NO	NO	NO	NO
normal	1.68	25.1	5.39	1.06	5.53	1.26	FEMALE	37	married	higher_education	3000-5000	NO	<6	4	NO	NO	NO	NO
normal	1.68	28	5.38	2.07	5.28	0.98	MALE	37	married	higher_education	3000-5000	YES	<6	4	NO	YES	NO	YES
normal	1.68	20.5	4.33	0.71	4.24	1.53	FEMALE	35	married	higher_education	3000-5000	NO	<6	3	NO	NO	NO	NO
normal	1.67	24.5	3.6	1.74	4.86	0.77	MALE	30	divorced	higher_education	3000-5000	NO	<6	4	NO	NO	NO	YES
normal	1.67	22.3	3.7	0.59	4.68	0.96	MALE	29	spinsterhood	higher_education	3000-5000	NO	<6	2	NO	NO	NO	NO
normal	1.67	19.4	4.68	1.4	5.08	0.96	MALE	27	spinsterhood	higher_education	3000-5000	NO	<6	3	NO	NO	NO	NO
normal	1.67	21.1	4.23	0.85	4.5	1.44	MALE	32	married	higher_education	3000-5000	YES	<6	4	NO	NO	NO	NO
normal	1.67	23.8	4.76	1.11	4.87	1.25	FEMALE	42	married	senior_high_school	1000-3000	NO	<6	4	NO	NO	YES	NO
normal	1.66	22	4.29	0.86	5.67	1.41	MALE	36	married	higher_education	3000-5000	NO	<6	3	NO	YES	NO	NO
normal	1.65	19.9	4.64	0.66	4.43	1.34	FEMALE	29	married	higher_education	3000-5000	NO	<6	4	NO	NO	NO	NO
normal	1.65	20.6	4.28	0.79	4.7	0.87	FEMALE	45	married	higher_education	3000-5000	NO	<6	4	NO	NO	NO	NO
normal	1.65	24.3	3.7	0.87	5.3	1.04	FEMALE	37	married	higher_education	3000-5000	NO	<6	4	NO	NO	NO	NO
normal	1.65	21.6	4.15	1.17	4.58	0.97	FEMALE	33	married	higher_education	3000-5000	NO	<6	5	NO	NO	NO	NO
normal	1.65	20.7	4.69	1.41	5.41	1.28	FEMALE	38	married	senior_high_school	3000-5000	NO	<6	4	NO	NO	NO	NO
normal	1.64	26.3	6.06	0.85	4.53	1.66	FEMALE	39	married	higher_education	3000-5000	NO	<6	4	NO	YES	NO	YES
normal	1.64	35.5	3.61	1.27	5.06	0.99	MALE	37	married	higher_education	3000-5000	NO	<6	4	NO	NO	NO	NO
normal	1.64	25.2	5.31	1.19	4.63	1.22	MALE	33	married	higher_education	3000-5000	NO	<6	4	NO	YES	NO	NO
normal	1.64	28.6	4.48	7.22	8.62	0.83	MALE	38	married	higher_education	3000-5000	YES	<6	5	NO	NO	NO	YES
normal	1.64	24.1	3.82	0.7	4.56	1.17	FEMALE	39	married	higher_education	3000-5000	NO	<6	3	NO	NO	NO	NO
normal	1.64	18.2	4.12	0.67	5.83	1.67	FEMALE	29	married	higher_education	3000-5000	NO	<6	4	NO	NO	NO	NO
normal	1.63	32.2	6.03	1.29	5.35	1.52	MALE	33	married	higher_education	3000-5000	YES	<6	3	NO	YES	NO	YES
normal	1.63	24.4	3.57	0.93	5.34	0.99	MALE	34	spinsterhood	higher_education	3000-5000	YES	<6	5	NO	YES	NO	NO
normal	1.63	24.8	3.44	0.38	4.79	0.97	FEMALE	31	married	higher_education	3000-5000	NO	<6	4	NO	NO	NO	NO
normal	1.63	15.5	4.3	0.83	4.42	1.47	FEMALE	33	married	higher_education	1000-3000	NO	<6	2	NO	NO	NO	NO
normal	1.63	26.8	5.32	3.63	5.67	0.99	FEMALE	34	married	higher_education	3000-5000	NO	<6	3	NO	NO	NO	YES
normal	1.62	20.7	3.84	1.2	5.06	1.14	MALE	32	married	senior_high_school	3000-5000	YES	<6	4	YES	NO	NO	NO
normal	1.62	21.6	3.8	1.73	5.7	1	FEMALE	38	married	higher_education	3000-5000	NO	<6	4	NO	NO	NO	YES
normal	1.62	25.3	3.48	1.31	4.28	0.82	FEMALE	34	spinsterhood	higher_education	3000-5000	NO	<6	4	NO	NO	NO	NO
normal	1.61	22.7	3.91	1.58	4.88	0.97	FEMALE	44	married	higher_education	3000-5000	NO	<6	3	NO	NO	NO	NO
normal	1.61	29.5	4.5	1.25	5.16	0.93	MALE	38	married	higher_education	3000-5000	YES	<6	3	NO	NO	NO	NO
normal	1.6	23.3	3.89	0.85	4.86	1.39	FEMALE	39	married	higher_education	3000-5000	NO	<6	3	NO	NO	NO	NO
normal	1.6	20.2	4.99	2.04	4.48	1.29	FEMALE	38	married	senior_high_school	3000-5000	NO	<6	4	NO	NO	NO	YES
normal	1.6	22.4	4.58	0.97	5.4	1.03	MALE	35	married	higher_education	3000-5000	YES	<6	4	NO	NO	NO	NO
normal	1.6	24.1	4.48	1.18	5.3	1.37	FEMALE	36	married	higher_education	3000-5000	NO	<6	4	NO	NO	NO	NO
normal	1.6	19.5	4.27	1.06	4.77	1.57	FEMALE	26	spinsterhood	higher_education	3000-5000	NO	<6	4	NO	NO	NO	NO
normal	1.59	23.8	3.64	4.83	4.41	0.82	MALE	34	married	higher_education	3000-5000	YES	<6	5	NO	NO	NO	YES
normal	1.59	24.7	5.27	3.08	4.73	1.11	FEMALE	44	married	senior_high_school	1000-3000	NO	<6	3	NO	NO	NO	YES
normal	1.57	21.8	5.07	0.78	7.26	1.62	FEMALE	32	married	senior_high_school	3000-5000	NO	<6	4	NO	NO	NO	NO
normal	1.57	23.6	4.55	0.84	5.25	1.46	FEMALE	37	married	higher_education	3000-5000	NO	<6	3	NO	NO	NO	NO
normal	1.57	22	5.16	1.03	4.58	1.46	FEMALE	31	married	higher_education	3000-5000	NO	<6	4	NO	NO	NO	NO
normal	1.57	21.8	4.91	0.66	5.12	1.41	MALE	30	married	higher_education	3000-5000	YES	<6	4	NO	NO	NO	NO
normal	1.57	25.6	6.03	1.19	5.23	1.38	MALE	33	married	higher_education	3000-5000	NO	<6	5	YES	NO	NO	YES
normal	1.57	19.9	3.76	1.12	4.71	1.05	FEMALE	31	married	higher_education	3000-5000	NO	<6	3	NO	NO	NO	NO
normal	1.56	21.1	4.51	1.03	5.46	1.24	FEMALE	51	married	higher_education	3000-5000	NO	<6	4	NO	NO	NO	NO
normal	1.56	20.5	4.81	1.51	4.91	1	MALE	35	married	higher_education	3000-5000	NO	<6	3	YES	NO	NO	NO
normal	1.56	18.9	3.82	0.54	4.67	1.42	FEMALE	28	married	higher_education	3000-5000	NO	<6	3	NO	NO	NO	NO
normal	1.56	21.5	3.26	1.21	5.55	0.82	FEMALE	29	married	higher_education	3000-5000	NO	<6	5	NO	NO	NO	NO
normal	1.55	26.7	4.01	0.95	4.74	1.36	MALE	40	married	higher_education	3000-5000	NO	<6	4	NO	NO	NO	NO
normal	1.55	20.7	4	0.69	5.39	1.51	FEMALE	34	married	higher_education	3000-5000	NO	<6	4	NO	NO	NO	NO
normal	1.55	20.1	4.75	0.68	5.03	1.68	FEMALE	35	married	higher_education	3000-5000	NO	<6	4	NO	NO	NO	NO
normal	1.54	21.2	4.12	0.92	5.81	1.1	MALE	32	married	higher_education	3000-5000	YES	<6	3	YES	NO	NO	NO
normal	1.54	24.3	4.64	0.63	4.81	1.37	FEMALE	35	married	junior_high_school	3000-5000	NO	<6	3	NO	NO	NO	NO
normal	1.54	18.8	4.3	1.36	5.11	1.63	FEMALE	31	married	higher_education	3000-5000	NO	<6	4	NO	NO	NO	NO
normal	1.54	26.4	5.58	1.8	4.85	1.02	MALE	33	married	higher_education	3000-5000	NO	<6	4	NO	NO	NO	YES
normal	1.54	26.7	3.78	0.64	4.82	1.21	MALE	27	spinsterhood	higher_education	3000-5000	NO	<6	4	NO	NO	NO	NO
normal	1.53	19.7	4.73	1.08	5.36	1.57	FEMALE	37	married	higher_education	3000-5000	NO	<6	4	NO	NO	NO	NO
normal	1.53	23.9	4.5	1.16	5.1	1.5	FEMALE	42	married	higher_education	3000-5000	NO	<6	4	NO	NO	NO	NO
normal	1.53	22.3	3.93	1.19	5.14	1.22	MALE	43	married	higher_education	3000-5000	NO	<6	4	NO	NO	NO	NO
normal	1.53	24.7	4.56	1.27	5.24	1.02	MALE	37	married	higher_education	3000-5000	NO	<6	4	NO	NO	NO	NO
normal	1.53	23	5.36	0.99	5.39	1.44	FEMALE	43	married	senior_high_school	3000-5000	NO	<6	4	NO	NO	NO	NO
normal	1.52	25	4.41	0.56	4.43	1.57	FEMALE	32	married	senior_high_school	3000-5000	NO	<6	4	NO	NO	NO	NO
normal	1.52	18	4.1	0.65	5.19	1.14	MALE	34	married	higher_education	3000-5000	YES	<6	2	NO	NO	NO	NO
normal	1.52	20.9	5.43	1.17	4.81	1.88	FEMALE	66	married	primary_school	1000-3000	NO	<6	2	NO	NO	NO	NO
normal	1.52	22.9	3.24	0.83	4.6	0.88	MALE	35	married	higher_education	3000-5000	NO	<6	4	NO	YES	NO	NO
normal	1.52	27	4.62	1.17	4.84	0.97	MALE	38	married	higher_education	3000-5000	YES	<6	4	NO	NO	NO	NO
normal	1.52	18	3.77	0.9	4.82	1.13	FEMALE	37	married	higher_education	3000-5000	NO	<6	5	NO	NO	NO	NO
normal	1.51	18.3	4.14	0.62	5.47	1.39	FEMALE	38	married	higher_education	3000-5000	NO	<6	5	NO	NO	NO	NO
normal	1.51	18	3.57	0.79	5.34	1.33	FEMALE	27	spinsterhood	higher_education	3000-5000	NO	<6	3	NO	NO	NO	NO
normal	1.5	28.2	5.27	4.77	6.26	0.93	MALE	38	married	higher_education	3000-5000	NO	<6	3	YES	NO	NO	YES
normal	1.5	18.6	4.89	1.43	5.07	1.42	MALE	42	married	higher_education	3000-5000	NO	<6	3	NO	NO	NO	NO
normal	1.5	19.7	5.6	0.94	5.13	1.9	FEMALE	35	married	higher_education	3000-5000	NO	<6	4	NO	NO	NO	NO
normal	1.5	23.5	4.56	0.98	5.24	1.32	FEMALE	33	married	higher_education	3000-5000	NO	<6	3	NO	NO	NO	NO
normal	1.49	22.6	3.66	1.39	4.52	1.04	FEMALE	38	married	higher_education	5000to10000	NO	<6	4	NO	NO	NO	NO
normal	1.49	27.1	5.79	3.32	5.16	0.92	MALE	33	married	higher_education	3000-5000	YES	<6	2	NO	NO	NO	YES
normal	1.48	20.9	3.34	0.87	4.62	0.94	FEMALE	33	married	higher_education	3000-5000	NO	<6	4	NO	NO	NO	NO
normal	1.47	21.8	5.67	0.84	5.48	1.56	FEMALE	40	married	higher_education	3000-5000	NO	<6	3	NO	YES	NO	NO
normal	1.45	23.7	4.36	2.12	4.71	1.16	FEMALE	37	married	higher_education	3000-5000	NO	<6	3	NO	NO	NO	YES
normal	1.45	23	4.4	2.03	8.88	1.19	MALE	53	married	higher_education	1000-3000	NO	<6	3	NO	YES	YES	YES
normal	1.45	25.3	3.29	1.47	5	0.83	FEMALE	38	married	higher_education	1000-3000	NO	<6	4	NO	NO	NO	NO
normal	1.45	32.7	5.68	1.29	5.74	1.2	FEMALE	41	married	higher_education	3000-5000	NO	<6	4	NO	NO	NO	NO
normal	1.45	16.4	4.05	0.89	5.01	1.33	MALE	29	married	higher_education	3000-5000	NO	<6	4	NO	NO	NO	NO
normal	1.44	20.2	4.57	0.72	4.69	1.21	FEMALE	36	married	higher_education	3000-5000	NO	<6	4	NO	NO	NO	NO
normal	1.44	18.6	4.47	1.28	4.85	1.28	FEMALE	62	married	senior_high_school	1000-3000	NO	<6	3	NO	YES	NO	YES
normal	1.44	24.5	4.12	1.56	5.82	0.98	FEMALE	35	married	senior_high_school	3000-5000	NO	<6	4	NO	NO	NO	NO
normal	1.44	18.1	3.83	0.83	4.86	1.37	FEMALE	32	married	higher_education	3000-5000	NO	<6	4	NO	NO	NO	NO
normal	1.43	27.7	7.58	6.62	5.59	1.37	MALE	36	married	higher_education	3000-5000	NO	<6	4	NO	YES	NO	YES
normal	1.43	30.1	5.11	3.33	5.75	1.06	MALE	73	married	junior_high_school	3000-5000	NO	<6	3	NO	YES	NO	YES
normal	1.43	27.7	3.43	0.67	5.2	1.17	FEMALE	25	spinsterhood	higher_education	3000-5000	NO	<6	4	NO	YES	NO	NO
normal	1.43	23.1	4.03	0.47	4.88	1.2	FEMALE	26	married	higher_education	3000-5000	NO	<6	3	NO	NO	NO	NO
normal	1.41	21.6	3.86	0.47	4.15	1.49	FEMALE	32	married	higher_education	3000-5000	NO	<6	3	NO	NO	NO	NO
normal	1.41	25.4	3.57	0.56	4.9	1.32	FEMALE	32	married	higher_education	5000to10000	NO	<6	4	NO	NO	NO	NO
normal	1.4	25.6	3.81	3.44	5.67	0.78	MALE	39	married	higher_education	3000-5000	NO	<6	4	YES	NO	NO	YES
normal	1.4	21.9	4.36	0.63	5.59	1.46	FEMALE	39	married	higher_education	3000-5000	NO	<6	5	NO	NO	NO	NO
normal	1.4	27.7	3.67	0.89	4.51	1.18	MALE	44	married	higher_education	3000-5000	NO	<6	3	NO	NO	NO	NO
normal	1.4	25.9	5.34	2.04	4.82	1.07	MALE	34	married	higher_education	3000-5000	YES	<6	4	NO	NO	NO	YES
normal	1.4	27.1	3.47	0.53	4.68	1.12	MALE	31	married	higher_education	3000-5000	NO	<6	4	NO	NO	NO	NO
normal	1.4	21.2	5.74	0.68	5.16	1.55	FEMALE	24	married	higher_education	3000-5000	NO	<6	4	NO	NO	NO	YES
normal	1.39	24	3.74	0.68	5.26	1.36	MALE	35	married	higher_education	3000-5000	NO	<6	3	NO	NO	NO	NO
normal	1.39	29	5.26	5.31	5.1	1.13	FEMALE	40	married	higher_education	3000-5000	NO	<6	4	NO	YES	NO	YES
normal	1.39	24.2	5.07	1.12	4.69	1.61	FEMALE	37	married	higher_education	3000-5000	NO	<6	4	NO	NO	NO	NO
normal	1.39	20.7	3.15	1.19	5.23	1.02	MALE	40	married	higher_education	3000-5000	NO	<6	3	YES	NO	NO	NO
normal	1.39	18.1	4	0.88	4.51	1.09	FEMALE	36	married	higher_education	3000-5000	NO	<6	4	NO	NO	NO	NO
normal	1.39	19.9	3.45	0.98	4.75	1.22	FEMALE	32	married	higher_education	3000-5000	NO	<6	3	NO	NO	NO	NO
normal	1.38	27.9	3.93	0.88	4.81	1.42	MALE	27	married	higher_education	3000-5000	YES	<6	3	YES	NO	NO	NO
normal	1.37	30.3	5.09	1.27	5.54	1.14	MALE	44	married	higher_education	3000-5000	YES	<6	4	NO	NO	NO	NO
normal	1.37	18.1	4.15	0.53	5.12	1.57	FEMALE	39	married	higher_education	3000-5000	NO	<6	4	NO	NO	NO	NO
normal	1.37	22.2	4.03	1.1	4.82	0.84	MALE	36	married	higher_education	3000-5000	NO	<6	4	NO	NO	NO	NO
normal	1.37	31.3	5.37	3.6	5.45	0.94	MALE	33	married	higher_education	3000-5000	NO	<6	4	NO	YES	NO	YES
normal	1.37	19.3	3.33	0.75	5.07	1.1	FEMALE	30	married	higher_education	3000-5000	NO	<6	4	NO	NO	NO	NO
normal	1.36	22.9	5.58	0.93	4.45	1.36	FEMALE	36	married	higher_education	3000-5000	NO	<6	2	NO	NO	NO	NO
normal	1.36	25.5	3.46	0.48	5.12	1.34	FEMALE	41	married	senior_high_school	3000-5000	NO	<6	4	NO	NO	YES	NO
normal	1.36	26.2	4.01	0.93	4.75	1.34	FEMALE	44	married	higher_education	3000-5000	NO	<6	4	NO	NO	NO	NO
normal	1.35	22.7	3.73	1.85	6.9	1.07	MALE	33	married	higher_education	3000-5000	NO	<6	3	NO	NO	NO	YES
normal	1.35	21.7	3.51	0.6	4.95	1.06	FEMALE	36	married	higher_education	3000-5000	NO	<6	5	NO	NO	NO	NO
normal	1.34	23.8	4.99	1.84	5.13	1.08	FEMALE	44	married	senior_high_school	3000-5000	NO	<6	3	NO	NO	NO	YES
normal	1.34	19.8	3.66	0.71	4.76	1.52	FEMALE	34	married	higher_education	3000-5000	NO	<6	4	NO	NO	NO	NO
normal	1.34	24.8	4.76	1.49	6.01	0.99	MALE	38	married	higher_education	3000-5000	YES	<6	4	NO	NO	NO	NO
normal	1.34	22.4	4.66	1.66	4.92	0.93	MALE	39	married	higher_education	3000-5000	YES	<6	4	NO	NO	NO	NO
normal	1.34	25.6	5.22	0.93	4.55	1.6	MALE	35	married	higher_education	3000-5000	NO	<6	3	NO	NO	NO	NO
normal	1.33	28.1	3.96	2.07	4.35	0.85	MALE	36	married	higher_education	3000-5000	NO	<6	4	NO	YES	NO	YES
normal	1.33	22.9	5.59	0.74	4.79	1.75	FEMALE	49	married	higher_education	3000-5000	NO	<6	4	NO	NO	NO	NO
normal	1.33	18.9	3.29	0.99	4.4	1.15	FEMALE	31	married	higher_education	3000-5000	NO	<6	4	NO	NO	NO	NO
normal	1.31	20.6	3.36	1.26	7.45	1.18	FEMALE	35	spinsterhood	higher_education	3000-5000	NO	<6	5	NO	NO	NO	NO
normal	1.31	23.8	3.74	0.75	5.28	1.05	MALE	29	married	higher_education	3000-5000	NO	<6	4	NO	NO	NO	NO
normal	1.3	31.9	4.73	1.82	5.58	1.05	MALE	38	married	higher_education	3000-5000	NO	<6	4	NO	NO	NO	YES
normal	1.3	18.2	5.21	1.45	5.12	1.16	FEMALE	33	married	higher_education	3000-5000	NO	<6	4	NO	NO	NO	NO
normal	1.3	20.8	4.69	1.56	5.12	0.97	FEMALE	27	spinsterhood	higher_education	3000-5000	NO	<6	4	NO	NO	NO	NO
normal	1.29	26.3	4.85	2.92	5.14	1.14	MALE	35	married	higher_education	3000-5000	NO	<6	4	NO	NO	NO	YES
normal	1.29	26.2	4.89	2.01	5.53	0.97	MALE	32	married	higher_education	3000-5000	YES	<6	4	NO	YES	NO	YES
normal	1.29	19.5	3.02	1.25	5.13	0.86	MALE	39	married	higher_education	3000-5000	NO	<6	3	NO	NO	NO	NO
normal	1.29	21.7	5.42	1.53	4.13	1.36	FEMALE	27	married	higher_education	3000-5000	NO	<6	3	NO	NO	NO	NO
normal	1.28	23	4.99	1.08	5.1	0.98	MALE	42	married	higher_education	3000-5000	YES	<6	4	NO	NO	NO	NO
normal	1.28	22.6	3.48	0.84	5.12	1.22	FEMALE	37	married	higher_education	3000-5000	NO	<6	4	NO	NO	NO	NO
normal	1.28	24.7	4.18	1.16	5	0.99	FEMALE	34	married	higher_education	3000-5000	NO	<6	4	NO	NO	NO	NO
normal	1.27	22.4	4.52	4.46	5.2	0.96	FEMALE	40	married	higher_education	3000-5000	NO	<6	4	NO	NO	NO	YES
normal	1.27	26.8	4.4	0.97	5.44	1.29	FEMALE	37	married	higher_education	3000-5000	NO	<6	4	NO	NO	NO	NO
normal	1.27	20.1	3.44	0.59	4.81	0.99	FEMALE	24	spinsterhood	higher_education	1000-3000	NO	<6	3	NO	NO	NO	NO
normal	1.26	19.9	3.08	0.66	5.8	0.86	MALE	35	married	higher_education	3000-5000	NO	<6	4	YES	NO	NO	NO
normal	1.25	29.5	4.38	1.06	5.07	0.81	MALE	26	spinsterhood	higher_education	3000-5000	NO	<6	5	NO	NO	NO	NO
normal	1.25	26.5	4.6	0.8	5.47	1.42	FEMALE	26	married	higher_education	3000-5000	NO	<6	4	NO	NO	NO	NO
normal	1.24	24.7	5.41	0.72	5.15	1.92	FEMALE	44	married	higher_education	3000-5000	NO	<6	2	NO	NO	NO	NO
normal	1.24	32.3	4.8	1.7	5.1	1.01	MALE	55	married	senior_high_school	3000-5000	NO	<6	4	NO	YES	NO	YES
normal	1.24	21	4.74	1.24	5.26	1.25	MALE	39	married	higher_education	3000-5000	NO	<6	4	NO	YES	NO	NO
normal	1.24	25.1	4.07	0.52	5.27	1.14	FEMALE	35	married	higher_education	3000-5000	NO	<6	4	NO	NO	NO	NO
normal	1.24	24.1	4.33	0.92	4.92	1.03	MALE	26	spinsterhood	higher_education	3000-5000	NO	<6	3	YES	YES	NO	NO
normal	1.23	19.1	3.88	0.76	4.69	1.37	FEMALE	37	married	higher_education	3000-5000	NO	<6	4	NO	NO	NO	NO
normal	1.23	23.2	4.34	1.38	5.14	1.11	MALE	35	remarry	higher_education	5000to10000	NO	<6	4	NO	NO	NO	NO
normal	1.23	17.2	4.09	1.03	5.02	1.58	FEMALE	32	married	higher_education	3000-5000	NO	<6	3	NO	NO	NO	NO
normal	1.22	22.7	4.59	0.87	4.67	1.57	FEMALE	39	married	higher_education	3000-5000	NO	<6	3	NO	NO	NO	NO
normal	1.22	24.4	4.66	1.17	4.85	1.07	FEMALE	29	married	higher_education	3000-5000	NO	<6	4	NO	NO	NO	NO
normal	1.22	21.4	4.27	0.73	4.87	1.27	FEMALE	37	married	higher_education	3000-5000	NO	<6	4	NO	NO	NO	NO
normal	1.21	18.5	4.97	1.47	4.94	1.13	MALE	31	married	higher_education	3000-5000	YES	<6	4	NO	NO	NO	NO
normal	1.21	17.8	4.17	0.65	4.5	1.13	FEMALE	33	married	higher_education	3000-5000	NO	<6	3	NO	NO	NO	NO
normal	1.21	27.7	4.41	2.24	5.29	0.78	MALE	31	married	higher_education	3000-5000	NO	<6	4	NO	YES	NO	YES
normal	1.21	18.1	3.56	0.97	5.17	1.14	FEMALE	27	married	higher_education	3000-5000	NO	<6	4	NO	NO	NO	NO
normal	1.2	24.7	5.05	0.91	5.35	1.49	FEMALE	50	married	higher_education	3000-5000	NO	<6	4	NO	NO	NO	NO
normal	1.2	19.2	5.25	1.09	4.27	1.61	FEMALE	33	married	higher_education	3000-5000	NO	<6	4	NO	NO	NO	NO
normal	1.2	25.6	5.66	2.34	10.42	1.56	MALE	41	married	higher_education	3000-5000	NO	<6	4	NO	YES	NO	YES
normal	1.19	25.2	4.35	1.11	6.24	1.18	FEMALE	41	married	junior_high_school	3000-5000	NO	<6	4	NO	YES	NO	NO
normal	1.19	23.3	4.78	1.43	4.71	1.1	FEMALE	34	married	higher_education	3000-5000	NO	<6	3	NO	NO	NO	NO
normal	1.17	26.5	4.24	1.1	3.59	1.1	FEMALE	43	married	higher_education	3000-5000	NO	<6	4	NO	NO	NO	NO
normal	1.16	25.6	4.68	1	5.34	1.09	MALE	33	married	higher_education	3000-5000	NO	<6	4	NO	NO	NO	NO
normal	1.16	25	3.7	1.49	5.38	1.07	MALE	36	married	higher_education	5000to10000	NO	<6	4	NO	NO	NO	NO
normal	1.16	20.3	5.03	0.93	5.02	1.48	FEMALE	42	married	junior_high_school	3000-5000	NO	<6	2	NO	NO	NO	NO
normal	1.16	19.8	3.22	0.71	4.25	1.13	FEMALE	25	married	higher_education	3000-5000	NO	<6	5	NO	NO	NO	NO
normal	1.16	17.8	3.3	0.44	4.57	1.39	FEMALE	24	spinsterhood	higher_education	3000-5000	NO	<6	4	NO	NO	NO	NO
normal	1.15	28.2	3.93	0.53	4.86	1.21	FEMALE	31	married	higher_education	3000-5000	NO	<6	4	NO	NO	NO	NO
normal	1.14	18.7	3.2	0.53	4.19	1.29	FEMALE	33	married	higher_education	3000-5000	NO	<6	4	NO	NO	NO	NO
normal	1.14	32.1	3.27	0.97	6.1	0.86	MALE	41	married	higher_education	3000-5000	NO	<6	4	NO	YES	NO	NO
normal	1.14	19.9	3.7	0.48	4.52	1.53	FEMALE	40	married	higher_education	3000-5000	NO	<6	2	NO	NO	NO	NO
normal	1.13	23.3	5.17	2.52	5.02	1.18	MALE	36	married	higher_education	3000-5000	NO	<6	5	NO	NO	NO	YES
normal	1.13	29.9	3.78	0.76	4.93	1.15	FEMALE	33	married	higher_education	3000-5000	NO	<6	4	NO	NO	NO	NO
normal	1.13	22.6	4.79	2.52	5.37	1.09	FEMALE	36	married	higher_education	3000-5000	NO	<6	3	NO	NO	NO	YES
normal	1.12	22.4	4.92	2.37	5.18	1.07	FEMALE	42	married	higher_education	3000-5000	NO	<6	3	NO	NO	NO	YES
normal	1.12	20.1	4.96	0.87	4.41	1.47	FEMALE	35	married	higher_education	3000-5000	NO	<6	5	NO	NO	NO	NO
normal	1.11	26.2	3.26	1.32	5.74	0.78	MALE	68	married	junior_high_school	1000-3000	NO	<6	3	NO	YES	YES	YES
normal	1.11	23.5	3.69	0.48	5.07	1.41	FEMALE	29	married	higher_education	3000-5000	NO	<6	4	NO	NO	NO	NO
normal	1.1	19.7	4.17	0.68	5.54	1.44	MALE	35	married	higher_education	3000-5000	NO	<6	4	NO	NO	NO	NO
normal	1.1	20.6	4.46	0.76	5.11	1.47	FEMALE	36	married	higher_education	3000-5000	NO	<6	4	NO	NO	NO	NO
normal	1.09	19.9	4.45	0.54	4.41	1.67	FEMALE	34	married	higher_education	3000-5000	NO	<6	4	NO	NO	NO	NO
normal	1.09	25.6	4.52	1.02	5.79	1.56	FEMALE	44	married	higher_education	3000-5000	NO	<6	4	NO	NO	NO	NO
normal	1.09	18.6	4.75	1.17	4.72	1.41	FEMALE	34	married	higher_education	3000-5000	NO	<6	4	NO	NO	NO	NO
normal	1.09	26.3	4.35	2	4.93	0.91	MALE	23	spinsterhood	senior_high_school	3000-5000	YES	<6	4	NO	NO	NO	YES
normal	1.08	26.4	4.27	1.9	4.94	0.96	MALE	37	married	higher_education	3000-5000	NO	<6	5	NO	NO	NO	YES
normal	1.07	17.6	4.47	1.1	4.56	1.35	FEMALE	42	married	higher_education	3000-5000	NO	<6	3	NO	NO	NO	NO
normal	1.07	20.9	4.75	1.43	4.98	1.2	FEMALE	43	married	higher_education	3000-5000	NO	<6	4	NO	NO	NO	NO
normal	1.07	21	4.74	0.52	5.24	1.9	FEMALE	32	married	higher_education	3000-5000	NO	<6	5	NO	NO	NO	NO
normal	1.07	30.2	4.24	0.9	5.42	0.92	MALE	41	married	higher_education	3000-5000	NO	<6	4	YES	NO	NO	NO
normal	1.07	17.6	4.98	0.78	4.37	1.96	FEMALE	31	married	higher_education	3000-5000	NO	<6	4	NO	NO	NO	NO
normal	1.06	26.1	4.08	1.37	4.71	0.88	MALE	36	married	higher_education	3000-5000	YES	<6	4	NO	NO	NO	NO
normal	1.06	33.4	4.58	1.49	5.28	1.16	MALE	43	married	higher_education	3000-5000	NO	<6	5	NO	YES	NO	NO
normal	1.06	22.5	4.57	1.22	4.64	1.1	FEMALE	35	married	higher_education	3000-5000	NO	<6	5	NO	YES	NO	NO
normal	1.05	20.6	4.56	0.63	4.93	1.69	MALE	33	married	higher_education	3000-5000	YES	<6	3	NO	NO	NO	NO
normal	1.05	21.2	4.23	0.75	4.86	1.42	FEMALE	30	married	higher_education	3000-5000	NO	<6	4	NO	NO	NO	NO
normal	1.05	20.9	4.08	1.27	5.89	1.18	FEMALE	32	married	higher_education	3000-5000	NO	<6	4	NO	NO	NO	NO
normal	1.04	19.8	3.25	0.69	4.89	1.12	FEMALE	37	married	higher_education	3000-5000	NO	<6	4	NO	NO	NO	NO
normal	1.04	23.2	4.54	5.36	4.91	0.91	MALE	33	married	higher_education	3000-5000	YES	<6	4	YES	NO	NO	YES
normal	1.04	26.3	4.48	1.03	5.22	1.19	FEMALE	42	married	junior_high_school	3000-5000	NO	<6	5	NO	NO	NO	NO
normal	1.03	25.6	4.42	0.81	4.79	1.18	FEMALE	38	married	higher_education	3000-5000	NO	<6	4	NO	NO	NO	NO
normal	1.03	22.7	5.02	1.47	5.02	1.29	FEMALE	42	married	higher_education	3000-5000	NO	<6	3	NO	NO	NO	NO
normal	1.02	26.9	4.4	0.94	5.13	1.13	FEMALE	38	married	higher_education	3000-5000	NO	<6	4	NO	NO	NO	NO
normal	1.02	23.1	4.35	1.6	6.26	0.95	MALE	31	married	higher_education	3000-5000	YES	<6	4	NO	YES	NO	NO
normal	1.01	24.5	4.23	1.32	4.6	1.36	FEMALE	36	married	higher_education	3000-5000	NO	<6	4	YES	NO	NO	NO
normal	1.01	19.7	3.37	0.81	4.37	1.35	FEMALE	34	married	higher_education	5000to10000	NO	<6	3	NO	NO	NO	NO
normal	1.01	18.9	4.6	0.6	5.41	1.54	FEMALE	41	married	higher_education	3000-5000	NO	<6	4	NO	NO	NO	NO
normal	1.01	23.1	4.97	1.38	6.55	1.4	MALE	34	married	higher_education	3000-5000	NO	<6	3	NO	NO	NO	NO
normal	1.01	31.3	4.33	1.44	5.86	0.93	FEMALE	36	married	higher_education	3000-5000	NO	<6	3	NO	YES	NO	NO
normal	1	19.9	4.82	1.04	5.5	1.37	FEMALE	39	married	higher_education	3000-5000	NO	<6	5	NO	NO	NO	NO
normal	1	28.6	4.3	0.84	4.84	0.95	MALE	37	married	higher_education	3000-5000	YES	<6	4	NO	NO	NO	NO
normal	0.98	25.2	3.57	1.51	8.41	0.82	FEMALE	44	married	higher_education	3000-5000	NO	<6	4	NO	NO	NO	NO
normal	0.97	21.9	4.14	0.96	4.56	1.21	FEMALE	42	married	higher_education	3000-5000	NO	<6	4	NO	NO	NO	NO
normal	0.97	21.4	4.63	1.16	4.39	1.48	FEMALE	31	married	higher_education	3000-5000	NO	<6	4	NO	NO	NO	NO
normal	0.96	23.7	3.09	1.04	5.18	0.88	FEMALE	31	married	higher_education	3000-5000	NO	<6	4	NO	NO	NO	NO
normal	0.96	15.8	3.44	0.7	5.17	1.42	FEMALE	27	married	higher_education	3000-5000	NO	<6	4	NO	NO	NO	NO
normal	0.95	20.9	5.14	0.75	4.21	1.6	FEMALE	44	married	senior_high_school	3000-5000	NO	<6	5	NO	NO	NO	NO
normal	0.95	23.2	4.33	1.81	4.63	1.23	FEMALE	33	married	higher_education	3000-5000	NO	<6	3	NO	NO	NO	YES
normal	0.95	32.1	5.36	9.92	13.01	0.95	FEMALE	32	married	higher_education	3000-5000	NO	<6	4	NO	NO	NO	YES
normal	0.95	20.6	3.23	0.92	4.84	0.95	FEMALE	33	married	higher_education	3000-5000	NO	<6	4	NO	NO	NO	NO
normal	0.94	20.1	4.24	0.76	6.82	1.36	FEMALE	44	married	higher_education	3000-5000	NO	<6	4	NO	NO	YES	NO
normal	0.93	26.9	4.41	1.41	4.79	1.07	MALE	35	married	higher_education	3000-5000	NO	<6	3	YES	NO	NO	NO
normal	0.93	23.3	3.79	1	5.34	1.23	FEMALE	28	married	senior_high_school	3000-5000	NO	<6	5	NO	NO	NO	NO
normal	0.93	20	3.72	0.69	5.38	1.45	FEMALE	30	married	higher_education	3000-5000	NO	<6	3	NO	NO	NO	NO
normal	0.93	20.2	4.66	0.99	4.71	1.29	FEMALE	30	spinsterhood	higher_education	1000-3000	NO	<6	4	NO	NO	NO	NO
normal	0.92	31.9	4.22	1.85	5.11	1.03	FEMALE	38	married	higher_education	3000-5000	NO	<6	5	NO	YES	NO	YES
normal	0.92	25.6	3.86	1.65	6.57	0.85	MALE	36	married	higher_education	3000-5000	NO	<6	3	NO	NO	NO	NO
normal	0.91	26.5	3.53	1.48	6.69	0.82	MALE	55	married	senior_high_school	3000-5000	NO	<6	4	NO	YES	NO	NO
normal	0.91	23.3	4.65	1.07	5.83	1.19	MALE	43	married	higher_education	3000-5000	YES	<6	4	NO	NO	NO	NO
normal	0.91	20	3.67	0.59	4.83	1.29	FEMALE	34	married	higher_education	3000-5000	NO	<6	4	NO	NO	NO	NO
normal	0.91	22.2	4.44	0.69	5.16	1.66	FEMALE	38	married	higher_education	3000-5000	NO	<6	4	NO	NO	NO	NO
normal	0.9	23.8	4.34	1.79	5.53	1.13	FEMALE	44	married	higher_education	3000-5000	NO	<6	4	NO	NO	NO	YES
normal	0.9	20.2	3.99	1.05	4.45	1.36	FEMALE	43	married	senior_high_school	3000-5000	NO	<6	4	NO	YES	NO	NO
normal	0.89	33.8	3.94	1.35	8.48	0.97	MALE	40	married	higher_education	3000-5000	YES	<6	3	NO	NO	NO	NO
normal	0.89	20.6	3.89	2.11	5.05	0.84	FEMALE	39	married	higher_education	3000-5000	NO	<6	4	NO	NO	NO	YES
normal	0.89	21	3.39	0.72	4.83	0.89	MALE	42	married	senior_high_school	3000-5000	NO	<6	4	NO	NO	NO	NO
normal	0.87	24.2	4.47	1.01	4.99	1.64	FEMALE	36	married	higher_education	3000-5000	NO	<6	4	NO	NO	NO	NO
normal	0.87	20.5	4.45	0.69	4.34	1.74	FEMALE	32	married	higher_education	3000-5000	NO	<6	4	NO	NO	NO	NO
normal	0.86	22.4	4.66	0.66	5.13	1.83	FEMALE	40	married	higher_education	3000-5000	NO	<6	4	NO	NO	NO	NO
normal	0.86	30.1	4.79	6.37	5.8	0.99	MALE	35	married	higher_education	3000-5000	YES	<6	4	NO	NO	NO	YES
normal	0.86	21.7	4.3	0.66	4.46	1.78	FEMALE	37	married	higher_education	3000-5000	NO	<6	4	NO	NO	NO	NO
normal	0.86	19.1	4.36	1.08	5.08	1.81	FEMALE	35	married	higher_education	3000-5000	NO	<6	3	NO	NO	NO	NO
normal	0.85	22.7	4.14	0.98	4.51	1.13	FEMALE	41	married	higher_education	3000-5000	NO	<6	4	NO	NO	NO	NO
normal	0.85	26	3.65	0.58	4.61	0.98	MALE	32	married	higher_education	3000-5000	YES	<6	4	YES	YES	NO	NO
normal	0.85	19.8	5.02	0.51	4.89	1.75	FEMALE	27	married	higher_education	3000-5000	NO	<6	3	NO	NO	NO	NO
normal	0.82	21	3.42	1.14	5.19	0.94	FEMALE	36	married	higher_education	3000-5000	NO	<6	3	NO	NO	NO	NO
normal	0.82	23.8	4.2	1.03	4.84	1.42	FEMALE	44	married	higher_education	3000-5000	NO	<6	4	NO	NO	NO	NO
normal	0.81	18.4	5.01	0.71	5.12	1.66	FEMALE	33	married	higher_education	3000-5000	NO	<6	4	NO	NO	NO	NO
normal	0.79	21.8	4.35	1.24	4.69	1.36	FEMALE	34	married	higher_education	3000-5000	NO	<6	5	NO	NO	NO	NO
normal	0.78	27.1	3.91	1.06	6.05	1.09	FEMALE	24	spinsterhood	higher_education	3000-5000	NO	<6	4	NO	NO	NO	NO
normal	0.76	28.8	4.25	6.69	5.84	0.79	MALE	40	married	higher_education	3000-5000	YES	<6	4	NO	NO	NO	YES
normal	0.72	16.3	3.93	1.83	4.92	1.17	MALE	27	spinsterhood	higher_education	3000-5000	YES	<6	4	NO	NO	NO	YES
normal	0.71	20.1	2.67	0.5	4.74	1.15	FEMALE	35	married	higher_education	3000-5000	NO	<6	4	NO	NO	NO	NO
normal	0.67	21.7	4.06	0.83	5.02	1.3	FEMALE	40	married	higher_education	3000-5000	NO	<6	3	NO	NO	NO	NO
normal	0.65	22.8	3.52	1.17	4.88	1.07	FEMALE	41	married	higher_education	3000-5000	NO	<6	3	NO	NO	NO	NO
normal	0.65	21.9	4.04	1.23	4.45	1.44	MALE	39	married	higher_education	3000-5000	NO	<6	4	NO	NO	NO	NO
normal	0.65	22.5	4.33	1.53	4.82	1.47	FEMALE	35	married	higher_education	3000-5000	NO	<6	4	NO	NO	NO	NO
normal	0.64	29	3.77	1.09	5.1	1.07	FEMALE	32	married	higher_education	3000-5000	NO	<6	4	NO	NO	NO	NO
normal	0.61	24.5	1.98	0.54	4.6	0.69	FEMALE	32	married	higher_education	3000-5000	NO	<6	4	NO	NO	NO	NO
normal	0.6	32.7	3.7	0.97	4.29	1.26	FEMALE	35	married	higher_education	3000-5000	NO	<6	4	NO	NO	NO	NO
normal	0.59	18.9	3.07	0.69	4.57	1.65	FEMALE	52	married	junior_high_school	3000-5000	NO	<6	2	NO	NO	NO	NO
normal	0.58	23.5	3.19	0.65	4.92	1.03	FEMALE	35	married	higher_education	3000-5000	NO	<6	4	NO	NO	NO	NO
normal	0.58	21.2	2.93	0.77	5.75	1.04	FEMALE	43	married	higher_education	3000-5000	NO	<6	5	NO	NO	NO	NO
normal	0.36	18.3	3.64	1.18	4.53	1.64	FEMALE	34	spinsterhood	junior_high_school	3000-5000	NO	<6	4	NO	NO	NO	NO
normal	0.09	24.2	2.93	0.96	4.71	1.44	FEMALE	33	married	higher_education	3000-5000	NO	<6	4	NO	NO	NO	NO
normal	4.36	28.7	7.34	2.83	5.07	1.2	MALE	47	married	higher_education	3000-5000	NO	<6	3	YES	NO	NO	YES
normal	2.96	27.1	5.63	1.54	5.32	1.16	MALE	60	married	junior_high_school	1000-3000	YES	<6	4	YES	NO	NO	NO
normal	2.86	22.1	5.51	2.25	5.34	1.16	FEMALE	53	married	senior_high_school	5000to10000	NO	<6	4	NO	YES	NO	YES
normal	2.65	29.2	5.82	2.44	7.07	1.35	FEMALE	65	married	junior_high_school	3000-5000	NO	<6	3	NO	NO	NO	YES
normal	2.54	25.6	5.78	10.27	15.34	0.88	FEMALE	65	married	junior_high_school	1000-3000	NO	<6	3	NO	NO	NO	YES
normal	2.41	28.1	5.64	1.14	5.49	1.17	FEMALE	64	married	junior_high_school	1000-3000	NO	<6	5	NO	YES	YES	NO
normal	2.22	23.3	4.12	1.09	5.94	0.98	MALE	47	married	junior_high_school	1000-3000	YES	<6	3	YES	NO	NO	NO
normal	2.13	23.3	5.74	1.72	4.87	1.03	MALE	49	married	higher_education	3000-5000	YES	<6	3	YES	NO	NO	YES
normal	2.01	22.6	4.81	1	4.79	1.46	FEMALE	72	married	primary_school	3000-5000	NO	<6	3	NO	NO	NO	NO
normal	2.01	25.6	4.79	3.97	5.19	0.96	MALE	52	married	senior_high_school	5000to10000	YES	<6	4	NO	NO	NO	YES
normal	1.84	30.6	5.27	2.23	6.72	1.02	MALE	54	married	higher_education	3000-5000	NO	<6	3	NO	YES	NO	YES
normal	1.8	25.3	3.91	1.77	5.27	1.07	FEMALE	59	married	junior_high_school	3000-5000	NO	<6	1	NO	NO	NO	YES
normal	1.53	22.2	3.52	0.84	5.42	1.09	MALE	50	married	higher_education	3000-5000	YES	<6	4	NO	NO	NO	NO
normal	1.46	25.6	5.16	1.02	4.83	1.44	FEMALE	59	married	higher_education	3000-5000	NO	<6	3	NO	NO	NO	NO
normal	3.76	23.1	6.44	2.16	5.58	1.25	FEMALE	48	married	higher_education	3000-5000	NO	<6	4	NO	YES	NO	YES
normal	3.7	31.1	7.42	2.53	17.63	1.24	FEMALE	61	married	senior_high_school	3000-5000	NO	<6	5	YES	YES	YES	YES
normal	3.22	24.2	5.81	1.68	5.18	1.02	MALE	50	married	senior_high_school	1000-3000	YES	<6	4	YES	NO	NO	YES
normal	3.18	24.3	6.95	5.83	5.99	1.29	FEMALE	56	married	higher_education	3000-5000	NO	<6	2	NO	YES	NO	YES
normal	3.09	19.7	5.9	1.58	5.55	1.05	FEMALE	70	married	senior_high_school	3000-5000	NO	<6	4	NO	YES	NO	YES
normal	2.38	22.9	4.49	1.42	12.03	0.99	MALE	67	married	senior_high_school	3000-5000	YES	<6	2	NO	NO	YES	NO
normal	2.2	22.5	5.33	1.72	4.76	1.26	FEMALE	52	married	higher_education	5000to10000	NO	<6	5	NO	NO	NO	YES
normal	2.03	21.7	3.81	0.76	5.95	0.89	MALE	64	married	higher_education	3000-5000	NO	<6	4	NO	NO	NO	NO
normal	1.75	22.8	4.67	1.15	5.43	1.36	FEMALE	60	married	junior_high_school	1000-3000	NO	<6	2	NO	YES	NO	NO
normal	1.65	20.7	4.4	1.47	4.86	1.43	FEMALE	64	married	senior_high_school	3000-5000	NO	<6	2	NO	NO	NO	YES
normal	1.53	22.6	5.81	0.86	5.88	1.42	FEMALE	55	married	higher_education	3000-5000	NO	<6	4	NO	YES	NO	YES
normal	1.52	22.9	5.54	0.87	4.34	1.42	FEMALE	52	married	higher_education	3000-5000	NO	<6	4	NO	NO	NO	NO
normal	1.5	18.9	4.09	0.64	4.36	1.6	MALE	55	married	higher_education	3000-5000	NO	<6	4	NO	NO	NO	NO
normal	0.91	28.2	4.73	1	5.44	1.63	MALE	52	married	higher_education	3000-5000	NO	<6	4	NO	YES	NO	NO
normal	3.65	22.5	5.84	2.71	5.26	0.98	FEMALE	56	married	higher_education	3000-5000	NO	<6	5	NO	NO	NO	YES
normal	3.65	20.6	7.48	3.54	5.89	1.35	FEMALE	65	married	primary_school	1000-3000	NO	<6	2	NO	YES	NO	YES
normal	3.44	25.5	7.25	1.68	5.11	1.13	MALE	70	married	junior_high_school	1000-3000	YES	<6	2	NO	NO	NO	YES
normal	2.99	26.1	6.86	0.89	7.14	1.65	MALE	69	married	higher_education	3000-5000	NO	<6	4	NO	NO	NO	YES
normal	2.95	26.4	5.67	2.01	5.18	1.19	FEMALE	65	married	higher_education	3000-5000	NO	<6	2	NO	NO	NO	YES
normal	2.94	30	6	2.07	6.35	1.44	MALE	56	married	junior_high_school	3000-5000	NO	<6	4	YES	YES	NO	YES
normal	2.66	19.5	5.93	1.57	5.79	1.43	FEMALE	58	married	senior_high_school	5000to10000	NO	<6	4	NO	NO	NO	YES
normal	2.65	23.5	5.25	2.29	6.07	1.08	MALE	55	married	senior_high_school	3000-5000	Quitting	<6	4	YES	NO	NO	YES
normal	2.58	20.6	5.87	1.86	6.72	1.5	FEMALE	63	married	higher_education	3000-5000	NO	<6	3	NO	YES	YES	YES
normal	2.39	21.5	4.75	1.56	5.41	1.14	MALE	45	married	higher_education	1000-3000	YES	<6	4	YES	NO	NO	NO
normal	2.34	24.2	5.39	3.35	6.17	1.13	FEMALE	51	married	senior_high_school	1000-3000	NO	<6	4	NO	NO	NO	YES
normal	2.13	24	4.31	0.78	5.41	1.09	MALE	65	married	junior_high_school	3000-5000	YES	<6	4	NO	YES	NO	NO
normal	2.1	24.9	4.73	2.56	5.06	1.24	MALE	50	married	higher_education	3000-5000	NO	<6	4	YES	YES	NO	YES
normal	1.99	25.3	4.28	1.86	4.58	1.11	FEMALE	55	married	senior_high_school	5000to10000	NO	<6	4	NO	YES	NO	YES
normal	1.94	22.4	4.61	1.06	5.11	1.35	FEMALE	49	divorced	higher_education	3000-5000	NO	<6	5	NO	NO	NO	NO
normal	1.94	22.4	4.61	1.06	5.11	1.35	FEMALE	49	divorced	higher_education	3000-5000	NO	<6	5	NO	NO	NO	NO
normal	1.91	23.9	4.63	3.02	8.89	1.17	FEMALE	72	widowed	illiteracy	<1000	NO	<6	3	NO	YES	YES	YES
normal	1.68	28.5	5.29	1.06	5.11	1.33	MALE	48	married	higher_education	3000-5000	YES	<6	4	NO	YES	NO	NO
normal	1.64	28.3	4.19	2.49	11.57	0.86	MALE	47	married	higher_education	1000-3000	YES	<6	4	NO	NO	NO	YES
normal	1.6	25.1	3.44	2.03	5.31	0.78	MALE	56	married	junior_high_school	1000-3000	Quitting	<6	4	YES	YES	NO	YES
normal	1.45	20.5	4.06	0.93	5.73	1.29	MALE	68	married	junior_high_school	1000-3000	YES	<6	3	YES	NO	NO	NO
normal	1.4	27	3.46	1.48	5.12	0.83	FEMALE	47	married	junior_high_school	3000-5000	NO	<6	4	NO	NO	NO	NO
normal	1.4	24.1	3.9	1.44	4.67	0.87	FEMALE	52	married	higher_education	3000-5000	NO	<6	4	NO	YES	NO	NO
normal	1.34	22.2	4.7	5.19	4.96	0.83	MALE	51	married	higher_education	3000-5000	YES	<6	3	NO	NO	NO	YES
normal	0.87	27.4	2.46	1.6	14.74	0.64	MALE	51	married	higher_education	5000to10000	Quitting	<6	2	YES	YES	YES	YES
normal	3.97	22.1	6.68	2.14	5.36	1.16	FEMALE	56	married	senior_high_school	3000-5000	NO	<6	4	NO	NO	YES	YES
normal	2.85	24.8	6.97	1.84	5.27	1.32	FEMALE	51	married	higher_education	3000-5000	NO	<6	4	NO	NO	NO	YES
normal	2.76	23.3	5.46	0.79	5.08	1.39	FEMALE	59	married	higher_education	3000-5000	NO	<6	2	NO	NO	NO	NO
normal	2.75	23.1	5.02	1.78	5.43	1.2	FEMALE	51	married	higher_education	3000-5000	NO	<6	5	NO	NO	NO	YES
normal	2.57	27.1	4.85	1.33	8.77	0.95	FEMALE	67	married	primary_school	1000-3000	NO	<6	3	NO	YES	NO	NO
normal	2.22	21.1	5.66	3.53	5.2	1.02	MALE	48	married	senior_high_school	3000-5000	NO	<6	4	NO	NO	NO	YES
normal	2.13	26.2	5.31	1.41	8.34	1.11	FEMALE	72	married	primary_school	3000-5000	NO	<6	4	NO	YES	NO	NO
normal	2.11	25.7	5.13	3.02	5.24	1.47	FEMALE	66	married	higher_education	3000-5000	NO	<6	4	NO	YES	NO	YES
normal	2.07	24.3	4.57	0.86	4.35	1.32	FEMALE	61	married	junior_high_school	3000-5000	NO	<6	4	NO	NO	NO	NO
normal	1.81	21.4	4.53	2.08	4.61	1.13	FEMALE	48	married	senior_high_school	3000-5000	NO	<6	3	NO	NO	NO	YES
normal	1.78	25.6	4.3	3.13	5.8	1.01	FEMALE	73	married	primary_school	1000-3000	NO	<6	4	NO	YES	NO	YES
normal	1.71	21.7	4.55	1.52	4.71	1.24	FEMALE	59	married	senior_high_school	3000-5000	NO	<6	5	NO	YES	NO	NO
normal	1.63	26.5	3.71	1.62	5.71	0.98	FEMALE	65	married	junior_high_school	3000-5000	NO	<6	2	NO	YES	NO	NO
normal	1.51	21.4	4.69	0.69	5.24	1.72	FEMALE	45	married	senior_high_school	3000-5000	NO	<6	3	NO	YES	NO	NO
normal	1.47	25.4	4.23	1.51	6.23	1.03	MALE	78	married	senior_high_school	3000-5000	NO	<6	4	NO	NO	NO	NO
normal	1.41	34.3	5.38	2.6	6.63	1.27	MALE	47	married	higher_education	3000-5000	YES	<6	4	YES	YES	YES	YES
normal	1.34	22.6	3.21	0.65	5	1.02	MALE	51	married	higher_education	3000-5000	NO	<6	3	NO	YES	NO	NO
normal	0.91	25.6	3.95	0.91	5.47	1.18	MALE	48	married	senior_high_school	1000-3000	NO	<6	4	NO	NO	NO	NO
normal	0.55	17.1	3.52	0.7	4.95	1.26	MALE	46	married	higher_education	3000-5000	YES	<6	4	NO	NO	NO	NO
normal	3.82	21.7	6.25	2.28	4.61	1.13	FEMALE	52	married	senior_high_school	3000-5000	NO	<6	3	NO	NO	NO	YES
normal	3.37	30.8	7.33	1.35	6.74	1.21	FEMALE	67	married	primary_school	1000-3000	NO	<6	2	NO	YES	NO	YES
normal	3.18	25.4	6.33	1.27	5.03	1.34	FEMALE	54	married	senior_high_school	3000-5000	NO	<6	3	NO	NO	NO	YES
normal	3.14	24.1	5.3	1.29	5.95	1.31	FEMALE	62	married	primary_school	1000-3000	NO	<6	3	NO	YES	NO	NO
normal	2.89	24.8	6.19	4.23	5.22	1.14	FEMALE	72	married	primary_school	3000-5000	NO	<6	4	NO	YES	YES	YES
normal	2.73	27.5	5.62	1.08	7.54	1.61	FEMALE	70	widowed	primary_school	1000-3000	NO	<6	2	NO	YES	YES	NO
normal	2.73	25	5.18	0.66	5.14	1.39	MALE	48	married	higher_education	3000-5000	NO	<6	4	NO	YES	NO	NO
normal	2.64	24.4	5.21	1.87	5.72	1.02	FEMALE	73	married	primary_school	1000-3000	NO	<6	3	NO	YES	NO	YES
normal	2.62	26.6	4.81	0.98	5.4	0.97	MALE	66	married	primary_school	3000-5000	YES	<6	2	NO	YES	NO	NO
normal	2.61	27.4	4.71	1.41	7.69	0.9	MALE	61	married	junior_high_school	3000-5000	YES	<6	4	YES	YES	NO	NO
normal	2.51	27.3	5.18	2.79	5.1	1.07	FEMALE	48	married	higher_education	3000-5000	NO	<6	5	NO	YES	NO	YES
normal	2.32	29.3	4.79	1.84	5.19	1.02	FEMALE	66	married	illiteracy	3000-5000	NO	<6	3	NO	NO	NO	YES
normal	2.15	26	4.53	1.32	5.74	0.84	MALE	56	married	junior_high_school	3000-5000	Quitting	<6	4	NO	NO	NO	NO
normal	2.08	25	5.19	2.1	6.61	1.25	FEMALE	54	married	junior_high_school	3000-5000	NO	<6	4	NO	YES	NO	YES
normal	1.96	27.7	3.66	1.57	5.75	0.66	MALE	73	married	junior_high_school	3000-5000	NO	<6	3	NO	YES	NO	NO
normal	1.84	24.1	3.96	0.71	5.56	1.19	FEMALE	53	married	higher_education	3000-5000	NO	<6	2	NO	NO	NO	NO
normal	1.83	26	5.29	4.89	6.43	1.14	MALE	54	married	higher_education	3000-5000	YES	<6	4	YES	NO	NO	YES
normal	1.7	22.3	4.54	0.62	5.27	1.61	FEMALE	65	married	illiteracy	1000-3000	NO	<6	5	NO	NO	NO	YES
normal	1.66	18.5	4.26	0.58	4.5	1.29	FEMALE	51	married	higher_education	3000-5000	NO	<6	2	NO	NO	NO	NO
normal	0.63	26.8	4.04	4.21	16.58	0.9	FEMALE	50	married	higher_education	3000-5000	NO	<6	2	NO	YES	NO	YES
normal	3.13	24.5	5.88	1.82	8.47	1.04	FEMALE	50	married	senior_high_school	3000-5000	NO	<6	4	NO	YES	NO	YES
normal	3.11	19.8	5.32	1.37	5.08	1.37	FEMALE	55	married	junior_high_school	3000-5000	NO	<6	4	NO	NO	NO	NO
normal	3.04	19.1	6.24	1.44	5.8	1.35	FEMALE	66	married	higher_education	3000-5000	NO	<6	3	NO	YES	NO	YES
normal	2.94	27.4	5.09	1.36	6	1.19	MALE	63	married	senior_high_school	3000-5000	YES	<6	4	NO	YES	NO	NO
normal	2.87	21.6	5.76	0.82	4.77	1.3	FEMALE	59	married	senior_high_school	3000-5000	NO	<6	3	NO	NO	NO	YES
normal	2.57	25.2	4.93	1.3	5.04	0.96	MALE	51	married	higher_education	3000-5000	NO	<6	2	YES	YES	NO	NO
normal	2.55	29.3	5.24	1.93	4.88	1.21	FEMALE	70	married	primary_school	3000-5000	NO	<6	4	NO	NO	NO	YES
normal	2.47	24.8	5.95	1.03	5.24	1.62	FEMALE	61	married	senior_high_school	3000-5000	NO	<6	4	NO	NO	NO	YES
normal	2.38	29.1	5.23	1.66	5.79	1	FEMALE	52	married	senior_high_school	3000-5000	NO	<6	2	NO	NO	NO	YES
normal	2.01	24.8	4.66	2.7	5.61	1.21	FEMALE	73	married	junior_high_school	3000-5000	NO	<6	3	NO	YES	NO	YES
normal	1.82	31.4	6.15	2.68	6.3	1.13	FEMALE	73	widowed	illiteracy	1000-3000	NO	<6	2	NO	YES	NO	YES
normal	1.74	22.4	4.66	2.43	5.83	1.24	MALE	67	married	higher_education	5000to10000	NO	<6	2	NO	NO	NO	YES
normal	1.66	28.8	3.93	1.57	5.15	1.03	FEMALE	50	married	senior_high_school	3000-5000	NO	<6	3	NO	YES	NO	NO
normal	1.61	24	3.54	1.95	6.56	0.88	MALE	66	married	junior_high_school	3000-5000	Quitting	<6	4	NO	NO	YES	YES
normal	1.56	21.4	4.44	0.59	7.94	1.22	MALE	65	married	junior_high_school	1000-3000	NO	<6	4	YES	YES	YES	NO
normal	1.44	22.2	3.8	1.16	5.32	0.93	FEMALE	56	married	senior_high_school	3000-5000	NO	<6	2	NO	YES	NO	YES
normal	3.72	26.4	8.01	4.7	7.2	1.48	FEMALE	60	married	senior_high_school	1000-3000	NO	<6	5	NO	YES	NO	YES
normal	3.56	22.5	6.64	1.55	6.4	1.16	FEMALE	60	married	junior_high_school	1000-3000	NO	<6	2	NO	NO	NO	YES
normal	3.18	23.3	6.11	2.24	4.74	1.15	FEMALE	67	married	higher_education	3000-5000	NO	<6	4	NO	YES	NO	YES
normal	2.91	19.9	5.62	1.77	4.94	1.24	FEMALE	55	married	senior_high_school	3000-5000	NO	<6	2	NO	NO	NO	YES
normal	2.77	24.7	6.05	1.55	5.35	1.65	FEMALE	65	married	primary_school	3000-5000	NO	<6	5	NO	YES	NO	YES
normal	2.76	22.6	5.39	2.06	5.51	1.01	FEMALE	59	married	senior_high_school	3000-5000	NO	<6	3	NO	NO	NO	YES
normal	2.75	20.4	5	1.32	5.39	1	MALE	70	married	junior_high_school	1000-3000	YES	<6	2	NO	YES	NO	NO
normal	2.34	23.4	4.93	2.39	5.23	1.16	FEMALE	59	married	senior_high_school	3000-5000	NO	<6	4	NO	YES	NO	YES
normal	2.04	19.6	5.26	0.7	4.39	1.91	FEMALE	52	married	primary_school	1000-3000	NO	<6	3	NO	NO	NO	NO
normal	2.03	22.5	5.53	1.33	5.66	1.27	MALE	71	married	senior_high_school	3000-5000	NO	<6	3	YES	NO	NO	NO
normal	2	19.6	5.08	0.66	4.82	1.5	FEMALE	48	married	higher_education	3000-5000	NO	<6	3	NO	NO	NO	NO
normal	1.97	25.6	7.68	12.99	6.67	1.33	FEMALE	57	married	senior_high_school	3000-5000	NO	<6	3	NO	YES	NO	YES
normal	1.88	24.3	4.26	1.21	5.5	1.33	FEMALE	67	married	primary_school	1000-3000	NO	<6	4	NO	NO	NO	NO
normal	1.87	21.9	5.12	1.47	4.79	1.09	MALE	51	married	higher_education	3000-5000	NO	<6	4	NO	NO	NO	NO
normal	1.85	20.9	4.53	0.91	5.98	1.26	FEMALE	56	married	senior_high_school	3000-5000	NO	<6	4	NO	NO	NO	NO
normal	1.53	18.7	5.07	1.52	4.75	1.01	FEMALE	48	married	higher_education	3000-5000	NO	<6	5	NO	NO	NO	NO
normal	1.37	25.8	5.46	1.13	6.8	1.29	FEMALE	47	married	higher_education	3000-5000	NO	<6	3	NO	NO	NO	NO
normal	1.33	19.9	4.14	1	5.99	1.29	MALE	51	married	higher_education	3000-5000	NO	<6	2	NO	YES	NO	YES
normal	3.18	35.4	5.82	2.21	5.72	1.08	FEMALE	65	married	junior_high_school	3000-5000	NO	<6	3	NO	YES	NO	YES
normal	3.18	35.4	5.82	2.21	5.72	1.08	FEMALE	65	married	junior_high_school	3000-5000	NO	<6	3	NO	YES	NO	YES
normal	3.1	26.7	5.23	1.26	5.23	1.25	FEMALE	59	married	higher_education	3000-5000	NO	<6	4	NO	YES	NO	NO
normal	2.61	20.2	5.66	1.01	5.16	1.3	FEMALE	57	married	senior_high_school	1000-3000	NO	<6	5	NO	NO	NO	NO
normal	2.53	23.2	5.68	1.63	5.58	1.13	FEMALE	54	married	higher_education	3000-5000	NO	<6	4	NO	NO	NO	NO
normal	2.31	21.8	4.82	1.01	5.33	1.32	FEMALE	49	married	higher_education	3000-5000	NO	<6	4	NO	NO	NO	NO
normal	2.23	23.3	5.58	2.28	5.74	1.23	FEMALE	49	married	senior_high_school	3000-5000	NO	<6	3	NO	YES	NO	YES
normal	2.22	24	4.08	5.44	5.83	0.87	FEMALE	65	married	senior_high_school	3000-5000	NO	<6	3	NO	YES	NO	YES
normal	2.2	25.3	4.53	1.35	5.19	1.1	FEMALE	60	married	higher_education	3000-5000	NO	<6	3	NO	NO	NO	NO
normal	2.14	23.2	4.48	1.82	6.41	1.04	MALE	66	married	junior_high_school	3000-5000	NO	<6	3	NO	NO	YES	YES
normal	2.11	24.5	4.28	0.95	4.52	0.92	MALE	47	married	senior_high_school	3000-5000	YES	<6	3	NO	NO	YES	NO
normal	1.59	26.3	3.85	2.12	5.79	0.92	FEMALE	62	married	junior_high_school	3000-5000	NO	<6	2	NO	YES	NO	YES
normal	1.25	25	4.32	0.84	4.21	1.06	MALE	54	married	higher_education	3000-5000	YES	<6	4	NO	YES	NO	NO
normal	1.18	31.4	4.04	1.78	4.98	1.31	FEMALE	59	married	junior_high_school	3000-5000	NO	<6	4	NO	YES	YES	YES
normal	0.86	22.5	3.8	1.69	6.18	0.96	FEMALE	61	divorced	primary_school	1000-3000	NO	<6	3	NO	YES	NO	NO
normal	4.34	26.8	7.49	1.44	6.06	1.41	FEMALE	70	married	junior_high_school	3000-5000	NO	<6	3	NO	NO	NO	YES
normal	3.84	25.9	6.47	1.12	5.17	1.09	MALE	54	married	higher_education	3000-5000	YES	<6	4	YES	YES	NO	YES
normal	3.51	23.7	6.28	1.41	5.77	1.21	MALE	51	married	higher_education	3000-5000	NO	<6	3	NO	YES	NO	YES
normal	3.34	22.5	5.66	1.74	5.42	1.02	MALE	64	married	junior_high_school	3000-5000	YES	<6	3	NO	NO	NO	YES
normal	3.02	26.9	5.03	0.88	11.92	0.94	MALE	54	married	senior_high_school	3000-5000	YES	<6	3	NO	NO	YES	NO
normal	2.68	28	4.78	1.65	5.05	0.95	MALE	58	married	higher_education	3000-5000	NO	<6	4	NO	YES	NO	NO
normal	2.26	20.1	5.47	0.79	8.36	1.96	MALE	69	married	higher_education	3000-5000	Quitting	<6	3	NO	YES	YES	NO
normal	2.25	28.2	4.67	1.43	5.14	1.03	FEMALE	56	married	illiteracy	1000-3000	NO	<6	5	NO	NO	NO	NO
normal	2.15	25.2	5.58	1.62	5.6	1.56	FEMALE	68	married	primary_school	1000-3000	NO	<6	3	NO	YES	NO	NO
normal	2.1	26.6	5	2.38	5.99	0.88	MALE	45	married	higher_education	3000-5000	NO	<6	4	NO	YES	NO	YES
normal	2.04	24.2	5.38	1.17	5.08	1.45	MALE	68	married	primary_school	1000-3000	NO	<6	3	NO	YES	NO	NO
normal	1.99	24.5	4.73	1.67	5.13	1	MALE	69	married	junior_high_school	3000-5000	YES	<6	4	NO	NO	NO	NO
normal	1.79	20.4	5.22	2.35	5.09	1.13	FEMALE	62	married	senior_high_school	3000-5000	NO	<6	3	NO	YES	NO	YES
normal	1.63	25.4	4.42	0.69	7.26	1.68	FEMALE	80	widowed	higher_education	3000-5000	NO	<6	3	NO	YES	YES	NO
normal	1.43	17.8	3.93	0.75	4.37	1.57	MALE	81	married	higher_education	3000-5000	NO	<6	4	NO	NO	NO	NO
normal	1.3	24.1	5.1	1.1	5.69	2.03	FEMALE	53	married	higher_education	3000-5000	NO	<6	4	NO	NO	NO	NO
low	3.26	26.7	6.03	1.53	10.92	1.26	FEMALE	56	married	junior_high_school	1000-3000	NO	<6	4	NO	YES	NO	YES
low	3.06	34.4	8.43	2.58	6.51	1.37	MALE	47	remarry	senior_high_school	3000-5000	NO	<6	3	NO	YES	NO	YES
low	3	24.1	6.05	3.99	4.72	1.05	FEMALE	63	married	higher_education	3000-5000	NO	<6	4	NO	YES	NO	YES
low	2.92	25.4	6.68	1.91	5.18	1.18	MALE	61	married	senior_high_school	5000to10000	NO	<6	3	NO	NO	NO	YES
low	2.41	21.9	5.8	3.13	4.86	1.16	FEMALE	66	married	senior_high_school	3000-5000	NO	<6	3	NO	NO	NO	YES
low	2.35	21.6	4.27	1.93	5.55	1.17	FEMALE	68	married	senior_high_school	1000-3000	NO	<6	3	NO	NO	NO	YES
low	2.34	23.3	5.3	1.33	4.78	1.51	FEMALE	57	married	senior_high_school	3000-5000	NO	<6	4	NO	NO	NO	NO
low	2.14	21.5	6.45	2.19	4.72	1.47	FEMALE	68	married	higher_education	3000-5000	NO	<6	3	NO	NO	NO	YES
low	2.06	28.6	5.35	1.21	6.04	1.62	FEMALE	77	married	primary_school	3000-5000	NO	<6	5	NO	NO	NO	NO
low	1.36	22.3	3.18	0.77	8.03	0.98	MALE	61	married	senior_high_school	3000-5000	YES	<6	3	NO	YES	YES	NO
low	1.34	23.1	5.31	1.88	5.4	1.16	FEMALE	73	married	primary_school	1000-3000	NO	<6	3	NO	YES	NO	YES
low	1.22	23.9	4.99	0.95	5.8	1.29	MALE	80	married	junior_high_school	3000-5000	NO	<6	4	NO	YES	NO	NO
low	0.86	25.8	4.51	1.58	6.34	1.56	FEMALE	66	married	junior_high_school	1000-3000	NO	<6	3	NO	YES	NO	NO
low	0.8	24.4	4.57	3.34	11.02	1.07	FEMALE	60	married	senior_high_school	3000-5000	NO	<6	3	NO	YES	NO	YES
low	4.2	21.6	7.65	1.45	6.22	1.47	FEMALE	64	married	junior_high_school	3000-5000	NO	<6	2	NO	NO	YES	YES
low	3.42	24.7	6.74	1.46	5.62	1.69	FEMALE	52	married	senior_high_school	3000-5000	NO	<6	4	NO	YES	NO	YES
low	3.4	27.3	6.5	1.11	7.56	1.26	MALE	67	married	primary_school	3000-5000	Quitting	<6	4	NO	NO	NO	YES
low	3.15	20.3	5.84	1.49	4.44	1.14	FEMALE	52	married	higher_education	3000-5000	NO	<6	4	NO	NO	NO	YES
low	2.89	22.5	5.54	1.55	5	1.07	FEMALE	55	married	junior_high_school	3000-5000	NO	<6	3	NO	NO	NO	YES
low	2.82	23	5.97	3.87	5.22	1.19	FEMALE	68	married	junior_high_school	3000-5000	NO	<6	4	NO	NO	NO	YES
low	2.53	23.8	5.41	2.17	5.12	1.06	MALE	47	married	higher_education	3000-5000	YES	<6	4	NO	NO	NO	YES
low	2.43	25.2	5.65	1.68	5.4	1.39	FEMALE	63	married	senior_high_school	1000-3000	NO	<6	2	NO	NO	NO	NO
low	2.31	25.6	4.7	1.27	4.94	1	MALE	51	married	higher_education	3000-5000	NO	<6	5	NO	NO	NO	NO
low	2.27	20	4.51	0.6	4.99	1.09	FEMALE	63	married	higher_education	3000-5000	NO	<6	4	NO	NO	NO	NO
low	2.06	20.8	5.28	1.83	4.6	1.72	FEMALE	46	married	senior_high_school	3000-5000	NO	<6	3	NO	NO	NO	YES
low	1.95	22.5	4.23	0.88	4.78	1.12	FEMALE	62	married	junior_high_school	3000-5000	NO	<6	3	NO	NO	NO	NO
low	1.89	22.2	4.62	1.4	5.89	0.99	FEMALE	53	married	senior_high_school	3000-5000	NO	<6	4	NO	NO	NO	NO
low	1.49	27.3	3.35	2.53	5.31	0.76	FEMALE	55	married	junior_high_school	3000-5000	NO	<6	4	NO	NO	NO	YES
low	1.29	20.7	4.04	0.86	5.48	1.12	MALE	53	married	higher_education	3000-5000	NO	<6	3	NO	NO	NO	NO
low	4.14	22.5	7.77	1.98	5.03	1.84	FEMALE	76	married	junior_high_school	1000-3000	NO	<6	4	NO	NO	NO	YES
low	3.59	31.2	7.09	1.35	4.74	1.34	FEMALE	57	married	junior_high_school	3000-5000	NO	<6	2	NO	YES	NO	YES
low	3.56	22.7	6.29	2.12	6.4	1.13	FEMALE	69	married	higher_education	3000-5000	NO	<6	4	NO	YES	NO	YES
low	3.2	23.3	6.21	0.83	5.75	1.77	FEMALE	46	married	junior_high_school	1000-3000	NO	<6	3	NO	NO	NO	YES
low	2.85	23	6.03	1.06	4.74	1.32	FEMALE	66	married	senior_high_school	3000-5000	NO	<6	4	NO	YES	NO	YES
low	2.52	27.2	5.16	1.5	5.28	1.1	FEMALE	65	married	junior_high_school	3000-5000	NO	<6	2	NO	NO	NO	NO
low	2.43	29	4.87	0.77	8.49	1.15	FEMALE	67	married	senior_high_school	1000-3000	NO	<6	2	NO	YES	YES	NO
low	2.41	27.7	5.89	1.83	6.1	1.28	FEMALE	73	married	senior_high_school	3000-5000	NO	<6	4	NO	NO	NO	YES
low	2.34	25.4	4.1	3.5	4.93	0.89	FEMALE	64	married	junior_high_school	3000-5000	NO	<6	3	NO	YES	NO	YES
low	2.33	21.2	6.28	0.81	4.72	2.08	MALE	69	married	junior_high_school	3000-5000	YES	<6	3	YES	YES	NO	YES
low	2.1	20.9	4.66	1.37	5.91	1.38	FEMALE	66	married	senior_high_school	3000-5000	NO	<6	3	NO	NO	NO	NO
low	1.86	24.3	4.06	2.69	6.83	0.94	FEMALE	57	married	higher_education	3000-5000	NO	<6	3	NO	YES	YES	YES
low	1.81	18.7	4.8	1.05	6.57	1.53	FEMALE	69	married	primary_school	5000to10000	NO	<6	4	NO	YES	NO	NO
low	1.59	23.4	4.07	0.67	6.98	1	FEMALE	59	married	higher_education	3000-5000	NO	<6	5	NO	YES	YES	NO
low	3.03	29.5	5.57	2.78	5.23	1	MALE	53	married	higher_education	3000-5000	NO	<6	3	YES	YES	NO	YES
low	2.9	27.2	5.89	2.89	7.54	1.12	MALE	63	married	higher_education	3000-5000	Quitting	<6	6	NO	YES	YES	YES
low	2.48	19.3	5.74	1.53	5.42	1.73	FEMALE	63	married	senior_high_school	3000-5000	NO	<6	2	NO	NO	NO	YES
low	2.07	21	4.93	1.81	5.22	1.16	FEMALE	52	married	senior_high_school	3000-5000	NO	<6	4	NO	NO	NO	YES
low	2.05	25.8	4.46	1.65	5.32	1.09	MALE	65	married	junior_high_school	3000-5000	NO	<6	4	NO	YES	NO	NO
low	1.97	22.6	4.17	0.97	5.26	1.26	FEMALE	50	married	senior_high_school	3000-5000	NO	<6	2	NO	NO	NO	NO
low	1.8	25.8	6.37	3.24	4.79	1.28	MALE	52	married	higher_education	3000-5000	NO	<6	5	NO	NO	NO	YES
low	1.63	22.6	5.33	0.51	5.07	2.25	FEMALE	47	married	higher_education	3000-5000	NO	<6	3	NO	NO	NO	NO
low	1.59	22.9	3.75	0.58	4.88	0.98	FEMALE	52	married	higher_education	3000-5000	NO	<6	4	NO	NO	NO	NO
low	1.44	25.2	4.01	3.54	5.07	0.96	FEMALE	74	married	junior_high_school	3000-5000	NO	<6	4	NO	YES	NO	YES
low	1.08	21.2	5.06	0.89	5.32	1.47	FEMALE	49	married	higher_education	3000-5000	NO	<6	2	NO	NO	NO	NO
low	0.94	22.8	3.24	0.95	4.86	1.25	MALE	57	married	junior_high_school	1000-3000	Quitting	<6	4	YES	NO	NO	YES
low	0.85	25.9	4.15	2.13	9.94	0.95	MALE	52	married	higher_education	3000-5000	YES	<6	4	NO	YES	YES	YES
low	3.53	22.2	6.54	1.22	5.58	1.45	MALE	68	married	higher_education	3000-5000	NO	<6	4	YES	YES	NO	YES
low	3.4	25.8	6.31	1.87	5.8	1.27	FEMALE	67	married	primary_school	3000-5000	NO	<6	4	NO	YES	NO	YES
low	3.23	26.5	6.97	1.75	4.9	1.56	FEMALE	64	widowed	junior_high_school	3000-5000	NO	<6	2	NO	NO	NO	YES
low	3.17	20.9	6.48	1.53	8.61	1.55	MALE	63	married	junior_high_school	3000-5000	YES	<6	5	YES	YES	YES	YES
low	3.12	23.5	6.07	1.79	6.28	1.09	FEMALE	48	married	higher_education	5000to10000	NO	<6	4	NO	NO	NO	YES
low	2.87	23.8	6.3	4.09	6.01	1.25	FEMALE	63	married	senior_high_school	3000-5000	NO	<6	2	NO	YES	NO	YES
low	2.76	23.4	5.17	1.94	5.07	0.99	FEMALE	65	married	junior_high_school	3000-5000	NO	<6	2	NO	YES	NO	YES
low	2.75	25.1	5.14	1.15	5.67	1.25	FEMALE	54	married	senior_high_school	3000-5000	NO	<6	4	NO	YES	NO	NO
low	2.72	26.7	5.39	1.55	7.29	1.2	FEMALE	72	married	primary_school	1000-3000	NO	<6	3	NO	YES	NO	NO
low	2.57	24.3	5.13	1.24	7.2	0.97	FEMALE	67	married	illiteracy	<1000	NO	<6	2	NO	YES	NO	NO
low	2.32	26.8	4.59	1.72	7.06	1.04	FEMALE	72	married	primary_school	1000-3000	NO	<6	2	NO	YES	NO	YES
low	2.32	24.7	6.74	3.52	4.62	1.43	FEMALE	67	married	senior_high_school	3000-5000	NO	<6	4	NO	NO	NO	YES
low	2.2	25.3	4.72	0.7	5.38	1.18	FEMALE	52	married	higher_education	3000-5000	NO	<6	4	NO	NO	NO	NO
low	2.18	20.8	5.03	1.51	6.41	1.52	FEMALE	51	married	junior_high_school	3000-5000	NO	<6	3	NO	NO	YES	NO
low	2.05	24.5	5.55	1.07	5.76	1.63	FEMALE	55	married	junior_high_school	<1000	NO	<6	3	NO	YES	NO	NO
low	1.56	20.5	3.61	1.55	4.73	0.91	MALE	65	married	senior_high_school	3000-5000	NO	<6	4	NO	YES	NO	NO
low	1.27	26.6	4.54	1.1	5.44	1.31	MALE	65	married	junior_high_school	3000-5000	NO	<6	3	NO	YES	NO	NO
low	3.1	22	6.12	1.71	14.41	1.47	MALE	61	married	higher_education	3000-5000	NO	<6	3	YES	NO	YES	YES
low	2.91	21.8	5.56	1.47	5.26	1.13	MALE	72	married	junior_high_school	1000-3000	NO	<6	4	NO	YES	NO	NO
low	2.83	25.4	7.54	2.54	5.21	1.76	FEMALE	46	married	higher_education	3000-5000	NO	<6	1	NO	NO	NO	YES
low	2.71	21.8	5.8	0.68	5.25	1.65	MALE	65	married	higher_education	3000-5000	NO	<6	3	NO	NO	NO	YES
low	2.57	25.6	5.18	2.35	5.8	1.06	FEMALE	61	married	higher_education	3000-5000	NO	<6	2	NO	NO	NO	YES
low	2.32	22.4	4.99	1.09	5.98	1.45	MALE	51	married	higher_education	3000-5000	YES	<6	3	NO	YES	NO	NO
low	2.27	26.1	5.76	1.42	5.2	1.09	FEMALE	64	married	senior_high_school	3000-5000	NO	<6	4	NO	NO	NO	YES
low	2.04	28.2	4.73	1.82	5.47	1.03	MALE	51	married	higher_education	3000-5000	YES	<6	3	NO	YES	NO	YES
low	1.86	21.1	4.7	0.63	5.07	1.45	FEMALE	58	married	junior_high_school	3000-5000	NO	<6	4	NO	NO	NO	NO
low	1.84	24	6.42	2.65	5.72	1.41	FEMALE	63	married	junior_high_school	3000-5000	NO	<6	2	NO	YES	NO	YES
low	1.68	20.1	4.11	2.17	5.17	0.99	FEMALE	56	married	higher_education	1000-3000	NO	<6	3	NO	NO	NO	YES
low	1.3	21.1	5.38	1.15	4.84	1.33	FEMALE	74	married	junior_high_school	3000-5000	NO	<6	4	NO	NO	NO	NO
low	1.21	19.2	4.06	1.01	4.97	1.56	MALE	70	married	junior_high_school	3000-5000	NO	<6	4	NO	YES	NO	NO
low	3.7	26	6.28	1.88	5.27	1.36	MALE	30	married	higher_education	3000-5000	NO	<6	4	NO	NO	NO	YES
low	3.31	19.8	5.73	1.7	5.85	1.59	FEMALE	74	married	junior_high_school	5000to10000	NO	<6	4	NO	YES	NO	YES
low	2.65	27.8	5.78	1.37	5.92	1.23	FEMALE	65	married	senior_high_school	5000to10000	NO	<6	2	NO	NO	YES	YES
low	2.5	22.6	5.28	2.2	4.97	1.18	FEMALE	59	married	senior_high_school	3000-5000	NO	<6	4	NO	NO	NO	YES
low	2.45	24.7	5.79	1.4	4.6	1.13	MALE	57	married	senior_high_school	3000-5000	NO	<6	2	NO	YES	NO	YES
low	2.05	20.6	5.93	1.1	7.01	1.65	FEMALE	56	married	senior_high_school	1000-3000	NO	<6	4	NO	YES	NO	YES
low	1.87	27.2	5.75	1.16	5	1.34	FEMALE	71	married	primary_school	1000-3000	NO	<6	2	NO	YES	NO	YES
low	1.38	23.4	4.81	1.36	5.47	1.13	MALE	51	married	higher_education	<1000	NO	<6	4	NO	NO	NO	NO
low	1.36	23	4.92	0.73	5.28	1.87	FEMALE	63	married	junior_high_school	3000-5000	NO	<6	2	NO	NO	NO	NO
low	0.69	18.9	4.23	0.75	5.83	1.45	MALE	75	married	junior_high_school	3000-5000	NO	<6	4	NO	NO	NO	NO
low	3.38	26.1	6.3	1.5	5.08	1.36	FEMALE	67	married	junior_high_school	1000-3000	NO	<6	3	NO	NO	NO	YES
low	3.31	22	6.73	1.21	5.56	1.59	FEMALE	58	married	junior_high_school	3000-5000	NO	<6	4	NO	YES	NO	YES
low	2.78	22.5	5.97	3.01	6.31	1.1	FEMALE	54	married	higher_education	3000-5000	NO	<6	4	NO	NO	NO	YES
low	2.7	28.7	7.13	1.41	5.15	1.31	FEMALE	65	married	primary_school	3000-5000	NO	<6	5	NO	NO	NO	YES
low	2.58	21.7	6.03	1.65	5.17	1.13	MALE	47	married	higher_education	3000-5000	NO	<6	3	YES	NO	NO	YES
low	2.43	22	5.16	0.94	4.75	1.22	FEMALE	55	married	higher_education	3000-5000	NO	<6	4	NO	NO	NO	NO
low	2.43	23.8	4.48	1.67	5.02	1.14	FEMALE	75	married	primary_school	1000-3000	NO	<6	3	NO	NO	NO	NO
low	2.06	23.9	4.67	1.62	7.1	1.04	FEMALE	65	married	junior_high_school	1000-3000	NO	<6	4	NO	NO	YES	NO
low	2.02	22.1	5.73	1.79	5.87	1.33	FEMALE	65	married	junior_high_school	3000-5000	NO	<6	4	NO	NO	NO	YES
low	1.91	25.8	4.51	1.28	5.25	1.38	FEMALE	61	married	higher_education	3000-5000	NO	<6	2	NO	NO	NO	NO
low	1	26.3	4.13	0.85	5.28	0.98	MALE	60	married	primary_school	1000-3000	NO	<6	2	NO	YES	NO	NO
low	3.02	23.6	6.31	0.68	6.08	2.05	FEMALE	65	married	junior_high_school	3000-5000	NO	<6	4	NO	YES	NO	YES
low	3	23.7	6	2	5.11	1.51	FEMALE	52	married	higher_education	3000-5000	NO	<6	4	NO	YES	NO	YES
low	2.95	22	6.74	1.06	4.8	2.02	FEMALE	52	married	senior_high_school	3000-5000	NO	<6	2	YES	YES	NO	YES
low	2.85	20.5	5.26	0.68	6.64	1.13	FEMALE	64	married	junior_high_school	3000-5000	NO	<6	4	NO	NO	YES	NO
low	2.79	20.8	5.33	1.96	5.82	1.07	FEMALE	64	married	junior_high_school	3000-5000	NO	<6	5	NO	YES	YES	YES
low	2.66	24.4	6.43	2.06	7.96	1.47	FEMALE	51	married	junior_high_school	3000-5000	NO	<6	3	YES	YES	NO	YES
low	2.37	23.2	4.99	4.52	5.98	1.04	FEMALE	65	married	primary_school	3000-5000	NO	<6	3	NO	YES	NO	YES
low	2.17	26.2	5.27	0.75	5.15	1.5	MALE	75	married	higher_education	5000to10000	NO	<6	3	NO	NO	NO	NO
low	2.14	28.6	4.05	1.17	5.69	0.86	FEMALE	65	married	senior_high_school	5000to10000	NO	<6	3	NO	YES	NO	NO
low	2.14	21.5	5.24	1.05	4.74	1.52	FEMALE	65	married	illiteracy	1000-3000	NO	<6	4	NO	NO	NO	NO
low	2	21.9	6.32	1.82	4.57	1.75	FEMALE	52	married	higher_education	3000-5000	NO	<6	3	NO	NO	NO	YES
low	1.97	23.6	5.04	1.28	5.16	1.29	FEMALE	55	married	junior_high_school	1000-3000	NO	<6	3	NO	YES	NO	YES
low	1.94	21.5	4.79	2.06	6.46	0.84	FEMALE	67	married	primary_school	<1000	NO	<6	2	NO	YES	NO	YES
low	1.72	21.3	3.95	1.32	5.62	1.13	FEMALE	31	widowed	junior_high_school	3000-5000	NO	<6	3	NO	NO	NO	NO
low	1.45	18.4	4.13	0.73	5.24	1.37	FEMALE	64	married	junior_high_school	3000-5000	NO	<6	2	NO	NO	NO	NO
low	1.27	23	3.76	2.07	4.87	1.32	FEMALE	64	married	senior_high_school	3000-5000	NO	<6	2	NO	YES	NO	YES
low	2.75	24.1	5.21	1.8	5.99	1.01	FEMALE	66	married	illiteracy	3000-5000	NO	<6	4	NO	NO	NO	YES
low	2.74	24.6	5.58	1.67	5.83	1.42	FEMALE	67	married	senior_high_school	3000-5000	NO	<6	3	NO	YES	NO	NO
low	2.06	22.5	4.39	0.7	4.72	1.32	FEMALE	75	widowed	junior_high_school	1000-3000	NO	<6	2	NO	YES	NO	NO
low	1.89	23.3	4.15	0.86	5.27	1.23	FEMALE	57	married	senior_high_school	3000-5000	NO	<6	5	NO	NO	NO	NO
low	1.66	23.1	4.62	0.95	5.09	1.13	FEMALE	64	married	senior_high_school	3000-5000	NO	<6	1	NO	YES	NO	NO
low	1.37	20.8	6.16	1.45	4.66	1.46	FEMALE	57	married	senior_high_school	3000-5000	NO	<6	2	NO	NO	NO	YES
low	1.31	19.7	5.44	1.21	4.95	1.5	FEMALE	55	married	junior_high_school	3000-5000	NO	<6	4	NO	NO	NO	NO
low	1.15	21.7	4.89	0.56	5.21	1.57	FEMALE	51	married	higher_education	3000-5000	NO	<6	3	NO	NO	NO	NO
low	0.65	20.5	3.22	0.7	6.74	0.99	MALE	64	married	junior_high_school	3000-5000	NO	<6	4	NO	NO	NO	NO
low	0.62	25	3.45	1.7	11.05	0.77	FEMALE	65	married	higher_education	3000-5000	NO	<6	3	NO	YES	YES	YES
low	0.37	25.8	3.48	1.45	5.09	1.02	FEMALE	59	married	higher_education	3000-5000	NO	<6	4	NO	NO	NO	NO
low	2.86	21.8	5.16	0.98	5.11	1.05	MALE	54	married	senior_high_school	3000-5000	NO	<6	3	NO	YES	NO	NO
low	2.84	22	5.13	1.35	5.17	0.93	MALE	71	married	senior_high_school	3000-5000	YES	<6	3	NO	YES	NO	NO
low	2.76	26	4.89	3.37	6.18	1.03	FEMALE	64	widowed	junior_high_school	1000-3000	NO	<6	3	NO	YES	NO	YES
low	2.16	20.2	5.5	1.26	4.68	1.58	FEMALE	47	married	higher_education	3000-5000	NO	<6	3	NO	NO	NO	NO
low	3.5	21.3	7.13	2.18	5.18	1.35	FEMALE	62	married	junior_high_school	3000-5000	NO	<6	4	NO	YES	NO	YES
low	2.74	23	5.44	1.34	5.08	1.2	FEMALE	71	married	senior_high_school	3000-5000	NO	<6	4	NO	YES	NO	NO
low	2.74	23	5.44	1.34	5.08	1.2	FEMALE	71	married	senior_high_school	3000-5000	NO	<6	4	NO	YES	NO	NO
low	2.69	20.9	6.62	1.72	5.87	1.72	FEMALE	56	married	senior_high_school	5000to10000	NO	<6	1	NO	YES	NO	YES
low	2.47	20.1	5.82	2.99	5.41	1.65	FEMALE	66	married	junior_high_school	3000-5000	NO	<6	2	NO	YES	NO	YES
low	1.8	18.5	5.74	1.48	4.76	1.49	FEMALE	64	married	junior_high_school	1000-3000	NO	<6	3	NO	NO	NO	YES
low	3.2	29.1	6.84	1.76	5.67	1.09	FEMALE	65	married	junior_high_school	1000-3000	NO	<6	4	NO	YES	NO	YES
low	2.49	23.5	5.53	1.77	7.12	1.14	FEMALE	68	married	junior_high_school	3000-5000	NO	<6	3	NO	NO	NO	YES
low	2.13	21.2	5.16	4.7	4.59	1.06	FEMALE	57	married	senior_high_school	3000-5000	NO	<6	1	NO	YES	NO	YES
low	2.06	21.1	3.77	0.7	6.09	1.15	FEMALE	67	married	junior_high_school	1000-3000	NO	<6	3	NO	YES	NO	NO
low	1.91	22.9	5.51	1.48	5.23	1.23	FEMALE	56	married	senior_high_school	3000-5000	NO	<6	3	NO	YES	NO	NO
low	1.51	17.9	4.28	1.41	5.07	1.2	FEMALE	52	married	higher_education	3000-5000	NO	<6	4	NO	NO	NO	NO
low	1.17	20.3	5.5	0.86	4.99	1.48	FEMALE	62	married	senior_high_school	3000-5000	NO	<6	2	NO	YES	NO	NO
low	2.64	29.4	6.47	1.64	9.37	1.43	FEMALE	73	married	senior_high_school	3000-5000	NO	<6	3	NO	NO	YES	YES
low	2.38	21.6	4.72	2.63	5.43	1.03	FEMALE	52	married	higher_education	3000-5000	NO	<6	4	NO	NO	NO	YES
low	2.32	23.8	4.79	1.19	6.91	1.17	FEMALE	61	married	higher_education	3000-5000	NO	<6	3	NO	NO	NO	NO
low	2.14	26.6	6.68	1.31	5.07	1.81	FEMALE	58	married	higher_education	3000-5000	NO	<6	3	NO	NO	NO	YES
low	1.82	23.8	4.94	1.4	5.09	1.06	MALE	51	married	senior_high_school	1000-3000	YES	<6	2	NO	NO	NO	NO
low	1.25	18.7	4.46	1.11	4.5	1.18	FEMALE	49	married	higher_education	3000-5000	NO	<6	3	NO	NO	NO	NO
low	2.7	22.1	5.69	1.01	4.93	1.17	FEMALE	63	married	junior_high_school	3000-5000	NO	<6	3	NO	NO	NO	NO
low	2.7	22.1	5.69	1.01	4.93	1.17	FEMALE	63	married	junior_high_school	3000-5000	NO	<6	3	NO	NO	NO	NO
low	1.78	21.4	4.18	7.79	6.71	0.9	MALE	66	married	junior_high_school	3000-5000	Quitting	<6	2	NO	YES	YES	YES
low	1.72	26.4	4.06	2.7	6.37	0.96	FEMALE	66	married	junior_high_school	3000-5000	NO	<6	3	NO	NO	NO	YES
low	0.92	14.3	5.02	0.62	4.79	2.8	FEMALE	57	married	senior_high_school	1000-3000	NO	<6	3	NO	NO	NO	YES
low	3.08	23.4	6.61	2.48	5.66	1.26	FEMALE	58	married	primary_school	1000-3000	NO	<6	3	NO	NO	NO	YES
low	2.94	28.1	4.95	1.95	5.04	0.99	FEMALE	70	married	junior_high_school	3000-5000	NO	<6	4	NO	NO	NO	YES
low	2.25	23.7	5.37	1.41	5.83	1.5	FEMALE	64	married	senior_high_school	3000-5000	NO	<6	4	NO	NO	NO	NO
low	1.88	21.4	4.85	0.74	5.02	1.53	FEMALE	68	married	senior_high_school	3000-5000	NO	<6	2	NO	NO	NO	NO
low	1.33	19.1	5.36	0.72	5.25	1.69	FEMALE	62	married	illiteracy	1000-3000	NO	<6	1	NO	NO	NO	NO
osteoporosis	2.81	22.8	5.28	0.99	5.08	1.06	FEMALE	63	married	junior_high_school	3000-5000	NO	<6	4	NO	NO	NO	NO
osteoporosis	2.51	23.7	4.96	2.41	4.97	0.91	FEMALE	57	married	higher_education	3000-5000	NO	<6	3	NO	NO	NO	YES
osteoporosis	1.75	22.7	5.06	1.87	5.3	1.45	FEMALE	61	married	senior_high_school	3000-5000	NO	<6	3	NO	YES	NO	YES
osteoporosis	3.16	20.8	7.07	1.98	5.52	1.81	FEMALE	67	married	senior_high_school	3000-5000	NO	<6	2	NO	YES	NO	YES
osteoporosis	3.11	19.8	5.78	1.87	4.67	1.22	FEMALE	56	married	senior_high_school	3000-5000	NO	<6	5	NO	NO	NO	YES
osteoporosis	3.08	22.9	5.66	1.49	4.89	1.13	FEMALE	67	married	senior_high_school	3000-5000	NO	<6	2	NO	NO	NO	NO
osteoporosis	2.78	20.7	5.28	1.44	6.64	0.94	FEMALE	60	married	senior_high_school	3000-5000	NO	<6	3	NO	YES	NO	NO
osteoporosis	2.59	21.7	5.67	0.96	6.66	1.07	FEMALE	67	married	senior_high_school	1000-3000	NO	<6	3	NO	YES	NO	NO
osteoporosis	2.49	25	4.5	2.27	5.75	0.79	FEMALE	64	married	higher_education	3000-5000	NO	<6	2	NO	YES	NO	YES
osteoporosis	2.1	24.4	5.24	2.33	5.49	1.28	FEMALE	54	married	higher_education	3000-5000	NO	<6	4	NO	NO	NO	YES
osteoporosis	1.55	24.4	4.79	0.96	7.87	0.89	FEMALE	64	married	higher_education	3000-5000	NO	<6	4	NO	YES	YES	NO
osteoporosis	3.71	21.5	6.63	2.18	5.35	1.16	FEMALE	61	married	junior_high_school	1000-3000	NO	<6	3	NO	YES	NO	YES
osteoporosis	3.68	25	7.31	3.54	5.28	1.36	FEMALE	59	married	junior_high_school	3000-5000	NO	<6	5	NO	NO	NO	YES
osteoporosis	2.71	25	6.42	1.05	6.42	1.51	FEMALE	61	married	primary_school	1000-3000	NO	<6	4	NO	NO	NO	YES
osteoporosis	2.41	20.8	4.97	1.17	4.59	1.31	FEMALE	65	married	junior_high_school	3000-5000	NO	<6	4	NO	YES	NO	NO
osteoporosis	1.97	17.4	5.03	1.09	5.14	1.55	FEMALE	64	married	junior_high_school	3000-5000	NO	<6	1	NO	NO	NO	NO
osteoporosis	1.64	26.5	4.28	1.57	5.73	1	MALE	63	married	junior_high_school	5000to10000	YES	<6	3	YES	YES	NO	YES
osteoporosis	3.13	22.4	7.57	1.77	5.26	1.76	FEMALE	63	married	senior_high_school	3000-5000	NO	<6	4	NO	NO	NO	YES
osteoporosis	2.41	22.8	4.79	0.98	5.78	1.13	FEMALE	71	married	primary_school	1000-3000	NO	<6	4	NO	NO	NO	NO
osteoporosis	1.61	21.5	3.98	0.83	5.44	1.08	FEMALE	65	married	higher_education	5000to10000	NO	<6	4	NO	NO	NO	NO
osteoporosis	0.88	25.8	2.78	0.62	5.39	1.04	FEMALE	66	married	senior_high_school	3000-5000	NO	<6	5	NO	NO	NO	NO
osteoporosis	1.79	22.6	4.53	0.67	5.27	1.48	FEMALE	57	married	primary_school	1000-3000	NO	<6	2	NO	NO	NO	YES
osteoporosis	2.2	25.1	4.98	2.76	5.92	1.3	FEMALE	70	married	junior_high_school	1000-3000	NO	<6	3	NO	YES	NO	YES
osteoporosis	1.13	21.4	3.33	0.8	4.83	1.18	FEMALE	57	married	senior_high_school	3000-5000	NO	<6	2	NO	YES	NO	NO
osteoporosis	3.76	20.7	7.08	2.58	5	1.36	FEMALE	56	married	senior_high_school	3000-5000	NO	<6	5	NO	NO	NO	YES
osteoporosis	1.76	24.5	4.15	1.15	5.06	1.16	FEMALE	71	married	junior_high_school	3000-5000	NO	<6	3	NO	YES	NO	NO
osteoporosis	2.88	22.9	6.06	2.54	5.51	1.4	FEMALE	58	married	senior_high_school	3000-5000	NO	<6	5	NO	NO	NO	YES
osteoporosis	1.97	22.9	6.2	1.79	4.57	2.72	FEMALE	77	married	senior_high_school	3000-5000	NO	<6	3	NO	YES	NO	YES
osteoporosis	3.63	25.1	6.58	1.37	5.28	1.14	FEMALE	66	married	junior_high_school	1000-3000	NO	<6	3	NO	NO	NO	YES
osteoporosis	2.79	28.6	5.5	2.32	7.6	0.96	FEMALE	68	married	primary_school	1000-3000	NO	<6	2	NO	YES	NO	YES
normal	3.28	24	6.39	1.68	6.52	1.47	FEMALE	59	married	higher_education	3000-5000	NO	6to12	3	NO	NO	NO	YES
normal	3.07	26.1	5.8	3.73	5.23	1.08	MALE	46	married	junior_high_school	3000-5000	YES	6to12	4	NO	YES	NO	YES
normal	2.98	30.6	5.96	1.95	5.29	1.05	MALE	46	married	higher_education	3000-5000	NO	6to12	4	NO	YES	NO	YES
normal	2.95	28.2	5.76	1.75	4.99	1.07	MALE	66	married	junior_high_school	3000-5000	NO	6to12	3	NO	YES	NO	YES
normal	2.95	28.2	5.76	1.75	4.99	1.07	MALE	66	married	junior_high_school	3000-5000	NO	6to12	3	NO	YES	NO	YES
normal	2.86	25.7	5.47	0.98	5.39	1.22	MALE	46	married	senior_high_school	3000-5000	YES	6to12	4	NO	NO	NO	NO
normal	2.77	23.3	5.54	1.39	5	1.44	FEMALE	55	married	senior_high_school	3000-5000	NO	6to12	1	NO	NO	NO	NO
normal	2.71	21	6.11	0.98	4.39	1.26	FEMALE	47	married	higher_education	3000-5000	NO	6to12	4	NO	NO	NO	YES
normal	2.58	24.8	5.05	1.04	5.21	1.07	FEMALE	49	married	higher_education	3000-5000	NO	6to12	3	NO	NO	NO	NO
normal	2.48	27.8	5.67	0.9	7.56	1.23	FEMALE	54	married	senior_high_school	3000-5000	NO	6to12	2	NO	NO	NO	YES
normal	2.41	28.9	4.94	4.61	4.88	0.97	MALE	48	married	senior_high_school	3000-5000	YES	6to12	4	YES	YES	NO	YES
normal	2.35	24.9	5.23	1.27	5.21	1.06	MALE	50	married	higher_education	3000-5000	NO	6to12	3	NO	YES	NO	NO
normal	2.34	23.3	4.84	0.96	5.16	1.08	FEMALE	47	married	senior_high_school	1000-3000	NO	6to12	3	NO	NO	NO	NO
normal	2.14	24.5	4.5	2.45	5.3	1.01	MALE	55	married	higher_education	3000-5000	NO	6to12	5	NO	YES	NO	YES
normal	2.14	23.6	5.75	1.05	4.72	1.47	FEMALE	47	married	higher_education	3000-5000	NO	6to12	3	NO	YES	NO	YES
normal	1.96	25.9	4.15	1.17	9.27	1.07	MALE	67	married	senior_high_school	3000-5000	NO	6to12	2	NO	YES	YES	NO
normal	1.77	27.7	5.29	3.73	5.36	1	MALE	51	married	higher_education	3000-5000	NO	6to12	4	NO	YES	NO	YES
normal	1.73	20.3	5.01	0.58	4.8	1.54	FEMALE	49	married	higher_education	3000-5000	NO	6to12	4	NO	NO	NO	NO
normal	1.68	27.6	4.77	2.37	4.83	1.14	MALE	48	married	higher_education	3000-5000	NO	6to12	4	NO	YES	NO	YES
normal	1.55	19.1	4.5	0.9	4.97	1.9	FEMALE	49	married	higher_education	3000-5000	NO	6to12	4	NO	NO	NO	NO
normal	1.5	32.5	5.14	2.27	5.92	1.06	MALE	46	married	higher_education	3000-5000	YES	6to12	2	YES	NO	NO	YES
normal	1.42	24.6	4.66	1.13	4.66	1.31	FEMALE	45	married	senior_high_school	3000-5000	NO	6to12	5	NO	NO	NO	NO
normal	1.28	22.2	4.65	2.33	5.47	1.18	MALE	52	married	senior_high_school	3000-5000	NO	6to12	5	YES	YES	NO	YES
normal	1.27	28.2	4.48	2.75	5.5	1	FEMALE	47	married	junior_high_school	3000-5000	NO	6to12	4	NO	YES	NO	YES
normal	1.08	26.5	4.87	1.46	7.12	1.18	FEMALE	50	married	senior_high_school	3000-5000	NO	6to12	4	NO	NO	NO	NO
normal	0.75	24.6	4.42	0.86	5.05	1.55	MALE	51	married	senior_high_school	3000-5000	NO	6to12	4	NO	YES	NO	NO
normal	3.55	25.6	6.16	1.17	5.06	1.18	MALE	52	married	higher_education	3000-5000	YES	6to12	4	NO	NO	NO	YES
normal	3.37	27.1	5.98	1.51	5.45	1.39	MALE	49	married	higher_education	3000-5000	NO	6to12	5	YES	YES	NO	YES
normal	3.35	24.8	6.48	1.67	5.39	1.34	FEMALE	53	married	senior_high_school	3000-5000	NO	6to12	4	NO	NO	NO	YES
normal	3.13	28	5.83	1.6	5.81	1.34	FEMALE	60	married	junior_high_school	3000-5000	NO	6to12	2	NO	YES	NO	YES
normal	2.99	25.5	5.55	3.68	7.42	1.01	MALE	69	married	junior_high_school	3000-5000	NO	6to12	4	NO	YES	YES	YES
normal	2.82	25.1	5.69	1.08	6.06	1.11	MALE	64	married	junior_high_school	3000-5000	YES	6to12	4	YES	YES	NO	NO
normal	2.72	25.7	6.27	2.24	5.32	1.23	MALE	47	married	higher_education	5000to10000	NO	6to12	4	NO	YES	NO	YES
normal	2.6	23.6	5.25	2.63	5.47	0.89	MALE	50	married	higher_education	3000-5000	NO	6to12	4	NO	YES	NO	YES
normal	2.6	26.2	5.11	1.87	6.57	1.28	MALE	62	married	higher_education	3000-5000	NO	6to12	3	NO	NO	NO	YES
normal	2.59	22.1	5.2	1.15	5	1.41	FEMALE	52	married	junior_high_school	1000-3000	NO	6to12	3	NO	NO	NO	NO
normal	2.51	20.1	4.97	1.81	4.58	1.11	FEMALE	51	married	higher_education	3000-5000	NO	6to12	3	NO	NO	NO	YES
normal	2.47	32.3	4.62	2.33	8.84	1.24	FEMALE	45	married	higher_education	3000-5000	NO	6to12	4	NO	YES	NO	YES
normal	2.4	23.3	4.88	1.44	5.36	0.96	FEMALE	46	married	higher_education	3000-5000	NO	6to12	2	NO	NO	NO	NO
normal	2.36	23.1	5.27	1.15	6.15	1.25	FEMALE	54	married	higher_education	5000to10000	NO	6to12	3	NO	NO	NO	NO
normal	2.26	24.9	5.73	1.45	8.87	1.15	MALE	55	married	senior_high_school	3000-5000	NO	6to12	4	YES	YES	NO	YES
normal	2.22	27.3	4.41	3.37	6.34	0.82	MALE	65	married	junior_high_school	3000-5000	YES	6to12	4	YES	YES	YES	YES
normal	2.16	24.4	4.51	1.44	4.68	1.15	MALE	52	married	higher_education	3000-5000	Quitting	6to12	4	NO	YES	NO	NO
normal	2.08	22.5	4.1	1.76	5.61	0.89	MALE	50	married	higher_education	3000-5000	NO	6to12	4	NO	YES	NO	YES
normal	2.06	20.6	4.42	0.65	4.88	1.38	FEMALE	46	married	higher_education	3000-5000	NO	6to12	2	NO	YES	NO	NO
normal	1.94	22.6	4.48	3.6	5.17	1.01	FEMALE	48	married	senior_high_school	3000-5000	NO	6to12	5	NO	NO	NO	YES
normal	1.84	31.3	4.62	2.4	5.72	0.9	MALE	55	married	higher_education	5000to10000	YES	6to12	4	NO	YES	NO	YES
normal	1.83	21	6.42	1.38	4.53	1.93	FEMALE	47	married	higher_education	3000-5000	NO	6to12	4	NO	NO	NO	YES
normal	1.76	32.7	4.16	0.85	6.03	1.1	FEMALE	36	married	higher_education	3000-5000	NO	6to12	5	NO	YES	NO	NO
normal	1.76	24.9	4.75	1.43	5.35	1.05	MALE	62	married	senior_high_school	3000-5000	NO	6to12	4	NO	NO	NO	NO
normal	1.28	24.6	5.33	0.88	5.5	1.25	MALE	66	married	senior_high_school	3000-5000	NO	6to12	3	NO	NO	NO	NO
normal	3.72	19	6.06	1.64	5.2	1.27	FEMALE	56	married	higher_education	5000to10000	NO	6to12	3	NO	YES	NO	YES
normal	3.35	21.3	6.53	1.5	4.93	1.2	FEMALE	51	married	senior_high_school	3000-5000	NO	6to12	4	NO	NO	NO	YES
normal	3.11	23.7	6.13	1.79	5.02	1.26	FEMALE	54	married	higher_education	3000-5000	NO	6to12	4	NO	NO	NO	YES
normal	2.94	25.7	5.17	2.36	6.22	1.11	MALE	57	married	higher_education	3000-5000	NO	6to12	4	YES	NO	YES	YES
normal	2.79	26.3	5.28	2.39	5.41	0.98	MALE	64	married	junior_high_school	>10000	NO	6to12	4	NO	YES	NO	YES
normal	2.68	22.7	5.26	2.1	5.23	1.07	MALE	58	married	senior_high_school	3000-5000	YES	6to12	4	YES	NO	NO	YES
normal	2.65	27.5	5.23	1.71	6.02	1.1	MALE	61	married	higher_education	3000-5000	NO	6to12	1	NO	NO	NO	YES
normal	2.47	28.8	5.23	2.39	5.62	1.09	FEMALE	50	married	higher_education	5000to10000	NO	6to12	4	NO	YES	NO	YES
normal	2.45	26.7	5.24	2.47	5.81	1.23	FEMALE	62	married	junior_high_school	3000-5000	NO	6to12	3	NO	YES	NO	YES
normal	2.34	23.2	4.84	1.21	5.91	1.15	MALE	74	married	higher_education	3000-5000	Quitting	6to12	2	NO	YES	NO	NO
normal	2.33	28.7	5.41	1.86	5.98	1.08	FEMALE	77	married	illiteracy	1000-3000	NO	6to12	4	NO	NO	NO	YES
normal	2.21	28.9	4.08	1.44	4.87	0.81	MALE	66	married	senior_high_school	3000-5000	YES	6to12	3	NO	YES	NO	NO
normal	2.16	25.2	5.3	1.62	5.63	1.12	FEMALE	48	married	higher_education	5000to10000	NO	6to12	4	NO	NO	NO	NO
normal	2.11	20.8	5.35	0.6	5.65	1.75	MALE	68	married	primary_school	<1000	NO	6to12	3	NO	NO	NO	NO
normal	2.05	30.2	5.64	1.28	5.9	1.03	FEMALE	52	married	junior_high_school	1000-3000	NO	6to12	2	NO	NO	NO	NO
normal	2.05	28.6	4.93	2.5	5.26	1.16	MALE	52	married	higher_education	3000-5000	YES	6to12	3	YES	YES	NO	YES
normal	1.93	22.4	4.71	0.45	5.86	1.43	MALE	69	married	primary_school	3000-5000	NO	6to12	2	NO	YES	NO	NO
normal	1.91	25.9	5.62	1.69	5.91	1.56	MALE	65	married	higher_education	3000-5000	NO	6to12	4	NO	YES	NO	NO
normal	1.78	23.7	4.1	1.4	4.67	1.17	MALE	49	married	higher_education	3000-5000	YES	6to12	4	NO	NO	NO	NO
normal	1.71	26.7	4.85	5.13	5.6	1.11	MALE	51	married	senior_high_school	3000-5000	NO	6to12	4	NO	NO	NO	YES
normal	1.7	19.5	4.18	0.63	5.22	1.53	FEMALE	47	married	senior_high_school	3000-5000	NO	6to12	3	NO	NO	NO	NO
normal	1.63	25.8	4.22	5.97	5.56	0.81	MALE	66	married	senior_high_school	3000-5000	YES	6to12	4	YES	NO	NO	YES
normal	1.61	29.1	5.03	6.03	6.19	1.04	MALE	53	married	higher_education	3000-5000	NO	6to12	3	YES	NO	NO	YES
normal	1.59	31	4.02	1.33	5.08	0.96	MALE	52	married	senior_high_school	3000-5000	YES	6to12	2	NO	YES	NO	NO
normal	1.57	27.2	5.48	1.55	5.95	1.19	MALE	51	married	higher_education	3000-5000	NO	6to12	5	NO	YES	NO	NO
normal	1.56	23.6	3.88	1.01	5.27	0.99	MALE	69	married	primary_school	3000-5000	NO	6to12	3	NO	NO	NO	NO
normal	1.53	22.4	5.29	1.08	5.32	1.57	FEMALE	52	married	senior_high_school	3000-5000	NO	6to12	3	NO	NO	NO	NO
normal	1.47	24.6	4.16	1.22	8.77	0.87	MALE	65	married	primary_school	1000-3000	YES	6to12	2	YES	YES	YES	NO
normal	1.29	23.4	3.33	1.44	6.79	1.02	MALE	69	married	junior_high_school	3000-5000	NO	6to12	4	NO	YES	NO	NO
normal	1.24	27.5	4.71	1.75	4.62	0.97	MALE	50	married	senior_high_school	3000-5000	NO	6to12	3	NO	NO	NO	YES
normal	0.91	22.5	5	0.68	5.31	1.72	MALE	54	married	junior_high_school	1000-3000	YES	6to12	5	NO	NO	NO	NO
normal	0.68	30.9	4.09	3.31	6.22	1.05	FEMALE	48	married	higher_education	3000-5000	NO	6to12	3	NO	YES	NO	YES
normal	3.88	25.4	8.01	1.87	6.66	1.5	FEMALE	62	married	illiteracy	3000-5000	NO	6to12	2	NO	YES	NO	YES
normal	3.42	21.6	6.12	1.46	5.86	1.25	MALE	53	married	higher_education	3000-5000	NO	6to12	3	YES	NO	NO	YES
normal	3.29	23	5.63	1.71	8.74	0.91	MALE	59	married	higher_education	3000-5000	YES	6to12	5	NO	YES	YES	YES
normal	3.24	21	6.66	1.62	5.44	1.56	FEMALE	47	married	higher_education	3000-5000	NO	6to12	2	NO	NO	NO	YES
normal	3.13	25.4	5.95	3.5	5.77	1.05	FEMALE	66	married	junior_high_school	1000-3000	NO	6to12	5	NO	NO	NO	YES
normal	3.08	31.6	5.85	1.09	4.9	1.44	FEMALE	54	married	higher_education	3000-5000	NO	6to12	4	NO	NO	NO	YES
normal	2.88	26.2	5.5	3.32	5.75	0.97	MALE	55	married	senior_high_school	3000-5000	YES	6to12	3	NO	YES	NO	YES
normal	2.81	25.7	5.3	1.3	4.73	1.04	MALE	75	married	primary_school	3000-5000	Quitting	6to12	3	NO	YES	NO	NO
normal	2.71	27.7	5.42	0.91	5.21	1.47	FEMALE	65	married	junior_high_school	1000-3000	NO	6to12	2	NO	YES	NO	NO
normal	2.56	22.7	5.61	1.2	5.49	1.29	FEMALE	53	married	higher_education	3000-5000	NO	6to12	4	NO	NO	NO	NO
normal	2.55	25.6	4.81	1.67	5.86	0.93	MALE	60	married	senior_high_school	3000-5000	NO	6to12	5	NO	NO	NO	NO
normal	2.54	23.7	6.6	2.94	5.52	1.3	MALE	51	married	higher_education	3000-5000	YES	6to12	4	NO	YES	NO	YES
normal	2.36	24.1	5.17	1.72	5.44	1.06	MALE	69	married	senior_high_school	3000-5000	NO	6to12	3	NO	YES	NO	YES
normal	2.35	23.9	5.34	1.15	5	1.63	FEMALE	50	married	higher_education	3000-5000	NO	6to12	4	NO	NO	NO	NO
normal	2.25	26.5	4.55	2.48	8.12	0.91	MALE	55	married	senior_high_school	3000-5000	Quitting	6to12	4	YES	YES	YES	YES
normal	2.18	29	4.35	2.49	6.15	1.03	FEMALE	52	married	junior_high_school	1000-3000	NO	6to12	3	NO	YES	NO	YES
normal	2.13	28.4	5.34	2.13	5.39	1.07	MALE	67	married	junior_high_school	1000-3000	NO	6to12	3	NO	YES	NO	YES
normal	2.1	27	5.12	1.43	5.59	1.01	MALE	63	married	junior_high_school	3000-5000	YES	6to12	4	NO	NO	NO	NO
normal	2.09	23.4	4.62	3.49	4.98	0.95	FEMALE	49	married	junior_high_school	1000-3000	NO	6to12	4	NO	NO	NO	YES
normal	2.04	24.9	5.09	0.94	5.2	1.24	MALE	66	married	junior_high_school	3000-5000	NO	6to12	4	NO	NO	NO	NO
normal	1.85	24.3	5.2	1.55	5.41	1.07	MALE	50	married	higher_education	3000-5000	YES	6to12	4	NO	NO	NO	NO
normal	1.82	21.4	5.27	1.43	7.37	1.29	FEMALE	55	married	higher_education	3000-5000	NO	6to12	4	NO	NO	NO	NO
normal	1.7	24.5	5.72	1.24	5.51	1.84	MALE	49	married	higher_education	3000-5000	NO	6to12	4	NO	NO	NO	YES
normal	1.67	23.9	4.25	0.85	5.72	1.04	FEMALE	48	married	higher_education	>10000	NO	6to12	4	NO	NO	NO	NO
normal	1.58	23.4	5.22	0.55	4.34	1.64	MALE	64	married	junior_high_school	3000-5000	NO	6to12	4	NO	YES	NO	NO
normal	1.45	26.1	6.39	7.27	5.11	1.27	FEMALE	49	married	senior_high_school	3000-5000	NO	6to12	5	NO	NO	NO	YES
normal	1.4	20.5	5.32	0.44	5.48	1.63	FEMALE	47	married	higher_education	5000to10000	NO	6to12	4	NO	NO	NO	NO
normal	1.35	19.6	5.5	0.7	5.12	1.69	FEMALE	56	married	senior_high_school	1000-3000	NO	6to12	3	NO	NO	NO	NO
normal	1.11	25.4	4.28	1.74	4.73	1.22	FEMALE	31	married	senior_high_school	3000-5000	NO	6to12	4	NO	NO	NO	YES
normal	1	25.3	4.4	1.68	5.12	1	MALE	56	married	primary_school	3000-5000	NO	6to12	5	NO	NO	NO	NO
normal	3.4	23.2	5.96	1.98	8.62	1.09	MALE	53	married	senior_high_school	3000-5000	YES	6to12	2	NO	NO	NO	YES
normal	3.07	22.5	7.1	0.92	5.64	2.87	FEMALE	51	married	senior_high_school	3000-5000	NO	6to12	3	NO	NO	NO	YES
normal	3.06	29.8	5.57	1.54	5.98	1.12	MALE	69	married	higher_education	3000-5000	Quitting	6to12	4	NO	YES	NO	NO
normal	2.98	22.6	6.97	2.16	6.53	1.15	MALE	60	married	higher_education	3000-5000	NO	6to12	4	NO	NO	NO	YES
normal	2.93	25.5	5.78	1.64	5.42	1.18	FEMALE	56	married	senior_high_school	3000-5000	NO	6to12	5	NO	NO	NO	YES
normal	2.77	25	6.33	1.05	5.57	1.49	FEMALE	52	married	higher_education	5000to10000	NO	6to12	4	NO	NO	NO	YES
normal	2.67	26	6.55	2.3	6.68	1.48	FEMALE	70	widowed	primary_school	1000-3000	NO	6to12	2	NO	NO	NO	YES
normal	2.64	23.3	5.69	2.11	5.62	1.08	MALE	62	married	junior_high_school	5000to10000	YES	6to12	2	YES	NO	NO	YES
normal	2.63	25.6	5.54	1.79	5.27	1.03	FEMALE	45	married	junior_high_school	1000-3000	NO	6to12	5	NO	YES	NO	YES
normal	2.61	22.7	5.21	1.12	4.94	1.11	MALE	57	married	senior_high_school	1000-3000	NO	6to12	3	NO	YES	NO	NO
normal	2.57	24.9	5.13	1.93	4.61	1.16	FEMALE	54	married	junior_high_school	3000-5000	NO	6to12	3	NO	YES	NO	YES
normal	2.55	23.7	4.8	1.13	5.35	1.13	FEMALE	50	married	junior_high_school	3000-5000	NO	6to12	2	NO	NO	NO	NO
normal	2.47	28.9	7.33	1.62	5.81	1.58	FEMALE	62	married	senior_high_school	1000-3000	NO	6to12	2	NO	YES	NO	YES
normal	2.43	22.7	5.6	0.84	5.05	1.55	FEMALE	51	married	higher_education	3000-5000	NO	6to12	5	NO	YES	NO	NO
normal	2.31	24.3	5.3	2.49	5.66	1.32	MALE	47	married	senior_high_school	3000-5000	Quitting	6to12	3	YES	NO	NO	YES
normal	2.21	28.3	4.72	1.59	4.63	1.38	MALE	53	married	higher_education	5000to10000	NO	6to12	4	NO	NO	NO	YES
normal	2.17	21	4.46	1.06	5.24	1.12	FEMALE	45	married	higher_education	3000-5000	NO	6to12	4	NO	NO	NO	NO
normal	2.09	24.2	5.48	1.53	5.28	1.16	FEMALE	46	married	higher_education	3000-5000	NO	6to12	3	NO	NO	NO	NO
normal	2.09	23	4.2	1.05	4.75	0.97	FEMALE	51	married	senior_high_school	3000-5000	NO	6to12	3	NO	NO	NO	NO
normal	2.02	17.2	4.71	1.12	5.02	1.45	MALE	45	married	higher_education	3000-5000	NO	6to12	2	NO	NO	NO	NO
normal	1.97	27.5	4.06	0.92	5.68	0.91	MALE	66	married	junior_high_school	3000-5000	NO	6to12	4	NO	NO	NO	NO
normal	1.91	26.3	4.48	6.08	6.01	0.9	FEMALE	65	married	senior_high_school	3000-5000	NO	6to12	3	NO	YES	NO	YES
normal	1.86	30.1	5.51	1.35	5.44	1.13	FEMALE	35	married	junior_high_school	1000-3000	NO	6to12	4	NO	NO	NO	NO
normal	1.76	23.3	4.21	0.5	4.37	1.45	MALE	48	married	higher_education	3000-5000	NO	6to12	3	NO	NO	NO	NO
normal	1.52	26.7	4.59	0.8	5.45	0.97	MALE	51	married	higher_education	3000-5000	NO	6to12	5	NO	YES	NO	NO
normal	1.51	27.8	5.41	1.88	5.6	1.06	MALE	49	remarry	senior_high_school	3000-5000	NO	6to12	3	NO	YES	NO	YES
normal	1.43	24.8	4.46	1.16	5.64	1.03	FEMALE	47	married	higher_education	>10000	NO	6to12	3	NO	NO	NO	NO
normal	1.36	25.9	2.65	0.99	6.37	0.77	MALE	65	married	senior_high_school	3000-5000	YES	6to12	3	YES	NO	YES	YES
normal	0.87	25.3	2.85	1.13	5.63	0.84	MALE	66	married	primary_school	1000-3000	NO	6to12	3	YES	YES	NO	NO
normal	4.02	22.5	7	1.45	5.53	1.46	FEMALE	51	married	senior_high_school	3000-5000	NO	6to12	4	NO	NO	NO	YES
normal	3.57	25.7	6.76	1.75	5.13	1.03	MALE	64	married	senior_high_school	3000-5000	Quitting	6to12	3	NO	YES	NO	YES
normal	3.51	24.3	6.17	1.78	5.12	1.17	MALE	49	married	higher_education	3000-5000	NO	6to12	3	NO	YES	NO	YES
normal	3.42	23.9	6.19	1.68	5.71	1.29	MALE	56	married	junior_high_school	3000-5000	NO	6to12	3	NO	NO	NO	YES
normal	3	28	5.81	2.92	6.41	1.16	MALE	56	married	senior_high_school	3000-5000	YES	6to12	3	YES	NO	NO	YES
normal	2.87	24.1	5.25	2.79	5.22	0.8	MALE	56	married	senior_high_school	3000-5000	NO	6to12	5	NO	NO	NO	YES
normal	2.57	23	5.34	4.64	5.72	1.11	MALE	47	married	junior_high_school	3000-5000	NO	6to12	4	NO	YES	NO	YES
normal	2.55	26.1	4.77	2.14	5.82	1	MALE	51	married	higher_education	3000-5000	NO	6to12	3	NO	YES	NO	YES
normal	2.54	19.9	5.78	0.78	4.67	1.62	FEMALE	46	married	higher_education	3000-5000	NO	6to12	2	NO	NO	NO	YES
normal	2.41	26.2	5.43	1.62	5.89	1.24	MALE	52	married	higher_education	3000-5000	Quitting	6to12	4	YES	YES	NO	NO
normal	2.39	20.1	6.49	0.83	5.2	1.89	FEMALE	46	married	higher_education	3000-5000	NO	6to12	4	NO	NO	NO	YES
normal	2.38	24.5	5.19	1.72	4.76	1.05	FEMALE	65	married	illiteracy	3000-5000	NO	6to12	3	NO	NO	NO	YES
normal	2.34	24.3	4.77	0.98	4.85	1.08	FEMALE	49	married	higher_education	3000-5000	NO	6to12	3	NO	YES	NO	NO
normal	2.32	30.6	5.15	2.92	4.91	1.07	FEMALE	59	married	senior_high_school	3000-5000	NO	6to12	3	NO	YES	NO	YES
normal	2.24	26.8	3.97	0.83	5.28	1.1	MALE	69	married	junior_high_school	3000-5000	NO	6to12	2	YES	NO	NO	NO
normal	2.2	28.9	5.42	1.51	5.23	1.41	MALE	51	married	higher_education	3000-5000	NO	6to12	4	YES	YES	NO	NO
normal	2.2	25	5.7	2.7	8.07	1.36	MALE	70	married	junior_high_school	3000-5000	Quitting	6to12	3	NO	YES	NO	YES
normal	2.19	24.8	4.76	10.9	8.29	0.84	MALE	54	married	senior_high_school	3000-5000	YES	6to12	3	NO	NO	NO	YES
normal	2.09	24.6	5.49	2.58	5.16	1.08	MALE	47	married	senior_high_school	3000-5000	NO	6to12	4	NO	NO	NO	YES
normal	2.07	28.6	4.76	1.38	6.05	1.05	MALE	68	married	senior_high_school	3000-5000	YES	6to12	2	YES	YES	NO	YES
normal	1.89	26.8	5.82	2	5.35	1.39	FEMALE	53	married	junior_high_school	3000-5000	NO	6to12	3	NO	NO	NO	YES
normal	1.75	21.8	3.77	0.59	4.85	1.09	MALE	53	married	senior_high_school	1000-3000	NO	6to12	3	NO	NO	NO	NO
normal	1.66	23.8	4.74	0.52	4.97	2.19	FEMALE	47	married	higher_education	3000-5000	NO	6to12	4	NO	NO	NO	NO
normal	1.36	26.2	3.58	2.06	8.5	0.98	MALE	63	married	senior_high_school	3000-5000	NO	6to12	5	NO	NO	NO	YES
normal	1.3	23.3	4.93	0.79	4.91	1.13	FEMALE	45	married	higher_education	3000-5000	NO	6to12	4	NO	NO	NO	NO
normal	1.29	22.8	3.99	1.48	4.56	1.1	FEMALE	48	married	higher_education	3000-5000	NO	6to12	3	NO	NO	NO	NO
normal	1.27	18.9	3.85	1.26	4.64	1.34	FEMALE	47	married	higher_education	3000-5000	NO	6to12	5	NO	NO	NO	NO
normal	0.94	24.3	4.31	3.17	5.66	1.02	FEMALE	49	married	junior_high_school	1000-3000	NO	6to12	5	NO	YES	NO	YES
normal	0.89	25.8	3.61	2.57	8.63	0.79	MALE	55	married	higher_education	3000-5000	NO	6to12	2	NO	NO	NO	YES
normal	3.76	27.6	6.96	1.44	5.11	1.71	FEMALE	50	married	senior_high_school	3000-5000	NO	6to12	4	NO	NO	NO	YES
normal	3.54	34.9	6.21	1.81	6.75	1.16	FEMALE	52	married	senior_high_school	3000-5000	NO	6to12	2	NO	NO	NO	YES
normal	3.4	20.9	7.03	1.09	5.42	1.83	FEMALE	58	married	senior_high_school	3000-5000	NO	6to12	2	NO	YES	NO	YES
normal	3.27	26.2	5.58	1.2	4.77	0.98	MALE	62	married	primary_school	3000-5000	YES	6to12	3	NO	NO	NO	NO
normal	3.23	25.4	5.81	3.18	5.84	1.13	MALE	62	married	higher_education	3000-5000	NO	6to12	3	NO	YES	NO	YES
normal	3.21	27.6	5.73	2.17	6.77	1.06	MALE	58	married	senior_high_school	3000-5000	NO	6to12	4	NO	YES	NO	YES
normal	3.04	24	5.98	7.59	9.49	0.98	MALE	54	married	senior_high_school	3000-5000	YES	6to12	4	YES	YES	NO	YES
normal	2.94	25.7	7.54	1.74	5.93	1.83	FEMALE	67	married	junior_high_school	3000-5000	NO	6to12	4	NO	NO	NO	YES
normal	2.75	27.8	5.77	1	6.04	1.58	MALE	62	married	senior_high_school	3000-5000	NO	6to12	4	NO	YES	NO	YES
normal	2.71	31.4	5.29	1.41	5.27	1.25	FEMALE	59	married	junior_high_school	3000-5000	NO	6to12	3	NO	YES	NO	NO
normal	2.63	23.3	5.51	1.55	5.2	1.24	FEMALE	70	married	senior_high_school	1000-3000	NO	6to12	2	NO	NO	NO	NO
normal	2.59	23	5.42	1	5.12	1.49	MALE	58	married	senior_high_school	1000-3000	YES	6to12	3	YES	NO	NO	NO
normal	2.58	22	4.49	2.36	4.93	0.79	MALE	51	married	senior_high_school	1000-3000	YES	6to12	4	NO	NO	NO	YES
normal	2.51	30.9	4.66	1.49	4.73	0.95	MALE	62	married	junior_high_school	1000-3000	YES	6to12	3	NO	NO	NO	NO
normal	2.45	25.3	4.48	1.8	5.45	0.83	MALE	46	married	higher_education	3000-5000	NO	6to12	3	NO	NO	NO	YES
normal	2.23	25.3	4.43	1.84	5	0.92	MALE	57	married	senior_high_school	3000-5000	YES	6to12	4	YES	YES	NO	YES
normal	2.01	26.8	5.72	1.6	5.52	1.06	MALE	49	married	higher_education	3000-5000	YES	6to12	4	YES	YES	NO	YES
normal	2	25.9	4.52	0.94	6.34	1.31	FEMALE	74	married	primary_school	1000-3000	NO	6to12	3	NO	YES	NO	NO
normal	1.93	23.5	5.16	1.07	5.01	1.39	FEMALE	48	married	higher_education	1000-3000	NO	6to12	3	NO	NO	NO	NO
normal	1.83	26.5	5.27	1.89	5.31	1.08	FEMALE	49	married	higher_education	3000-5000	NO	6to12	4	NO	NO	NO	YES
normal	1.8	25	5.4	1.04	4.76	1.8	FEMALE	47	married	senior_high_school	3000-5000	NO	6to12	2	NO	NO	NO	NO
normal	1.71	19	4.43	2.33	13.86	1.18	MALE	82	married	junior_high_school	3000-5000	YES	6to12	3	NO	NO	NO	YES
normal	1.62	24.3	5.98	3.06	6.93	1.35	MALE	57	married	junior_high_school	1000-3000	NO	6to12	5	NO	YES	NO	YES
normal	1.61	26.1	3.97	3.5	4.76	0.88	MALE	67	married	junior_high_school	3000-5000	YES	6to12	3	NO	YES	NO	YES
normal	1.5	22.8	3.58	1.43	5.69	0.94	FEMALE	45	married	higher_education	1000-3000	NO	6to12	4	NO	NO	NO	NO
normal	1.45	23.9	4.82	0.93	4.66	1.05	MALE	51	married	senior_high_school	3000-5000	YES	6to12	4	NO	NO	NO	NO
normal	1.45	21.5	4.98	1.56	5.24	1.91	MALE	53	married	higher_education	3000-5000	NO	6to12	4	YES	YES	NO	NO
normal	1.44	28	3.53	1.62	5.16	1.05	MALE	72	married	junior_high_school	3000-5000	NO	6to12	4	YES	NO	NO	NO
normal	1.41	26.6	4.11	0.82	6.43	1.21	MALE	62	married	higher_education	3000-5000	NO	6to12	3	NO	YES	NO	NO
normal	1.38	25.4	3.82	1.56	7.14	0.94	FEMALE	62	married	junior_high_school	3000-5000	NO	6to12	4	NO	YES	NO	NO
normal	1.31	25	4.34	1.57	4.83	1.09	FEMALE	54	married	higher_education	3000-5000	NO	6to12	5	NO	NO	NO	NO
normal	1.04	24	3.98	0.73	5.01	1.08	MALE	73	married	junior_high_school	1000-3000	Quitting	6to12	3	NO	NO	NO	NO
normal	1.02	19.7	3.63	1.92	4.83	1.05	FEMALE	50	married	higher_education	3000-5000	NO	6to12	3	NO	NO	NO	YES
normal	0.66	23.3	3.7	3.74	10.04	0.83	MALE	47	married	higher_education	3000-5000	NO	6to12	3	NO	YES	YES	YES
normal	3.52	19.4	6.89	0.69	5.9	1.66	FEMALE	51	married	senior_high_school	3000-5000	NO	6to12	4	NO	NO	NO	YES
normal	3.28	28.9	7.07	10.5	5.01	1.19	FEMALE	55	married	junior_high_school	1000-3000	NO	6to12	5	NO	NO	NO	YES
normal	3.1	23.3	6	1.24	5.95	0.93	MALE	45	married	higher_education	3000-5000	NO	6to12	4	YES	NO	NO	YES
normal	3.02	26.2	5.91	1.39	4.77	1.29	MALE	71	married	illiteracy	3000-5000	YES	6to12	4	YES	YES	NO	YES
normal	2.89	26.1	5.75	2.09	9.35	1.08	FEMALE	56	married	junior_high_school	3000-5000	NO	6to12	4	NO	NO	NO	YES
normal	2.8	31.6	5.7	1.85	5.97	1.08	MALE	65	married	senior_high_school	1000-3000	NO	6to12	2	NO	YES	NO	YES
normal	2.75	22.8	4.89	1	5.3	1.42	MALE	61	married	higher_education	3000-5000	YES	6to12	2	NO	YES	NO	NO
normal	2.71	27.4	5.32	1.11	6.41	1.2	FEMALE	48	married	higher_education	1000-3000	NO	6to12	4	NO	NO	NO	NO
normal	2.55	23.7	4.83	2.29	4.77	0.89	FEMALE	53	married	higher_education	1000-3000	NO	6to12	4	NO	NO	NO	YES
normal	2.33	28	4.81	0.83	5.27	1.24	FEMALE	61	married	junior_high_school	1000-3000	NO	6to12	4	NO	NO	NO	NO
normal	2.21	24.9	4.49	3.81	6.89	0.96	FEMALE	66	married	senior_high_school	3000-5000	NO	6to12	4	NO	YES	NO	YES
normal	2.21	25.4	5.7	1.91	4.7	1.03	MALE	48	married	higher_education	3000-5000	YES	6to12	2	NO	YES	NO	YES
normal	2.11	21	4.73	0.97	4.25	1.33	FEMALE	48	married	higher_education	3000-5000	NO	6to12	4	NO	NO	NO	NO
normal	2.1	23.9	4.01	1.76	7.72	0.74	MALE	76	married	higher_education	3000-5000	NO	6to12	4	NO	YES	NO	YES
normal	2.1	26.1	4.74	3.54	6.58	1.03	FEMALE	66	married	primary_school	1000-3000	NO	6to12	3	NO	YES	YES	YES
normal	2.02	22.2	5.39	1.72	4.68	1.18	FEMALE	47	married	higher_education	5000to10000	NO	6to12	3	NO	NO	NO	YES
normal	1.81	25.8	4.83	1.92	11.79	1.07	MALE	54	married	higher_education	3000-5000	YES	6to12	3	YES	NO	YES	YES
normal	1.78	34	4.31	1.15	7.29	1.42	FEMALE	49	married	higher_education	3000-5000	NO	6to12	4	NO	YES	NO	NO
normal	1.77	22.8	4.44	1.03	5.28	1.22	FEMALE	52	married	higher_education	5000to10000	NO	6to12	3	NO	NO	NO	NO
normal	1.77	22.7	5.63	2.29	4.88	1.18	MALE	46	married	higher_education	3000-5000	NO	6to12	4	NO	NO	NO	YES
normal	1.61	22	4.17	0.88	5.91	1.37	FEMALE	51	married	higher_education	3000-5000	NO	6to12	3	NO	NO	NO	NO
normal	1.56	26.8	5.08	1.23	5.59	1.08	MALE	67	married	primary_school	1000-3000	Quitting	6to12	3	NO	YES	NO	NO
normal	1.55	27.5	5.08	0.84	5.08	1.66	FEMALE	52	married	senior_high_school	3000-5000	NO	6to12	3	NO	YES	NO	NO
normal	1.41	26.5	3.86	1.25	5.01	1.38	MALE	66	married	higher_education	3000-5000	NO	6to12	4	YES	YES	NO	YES
normal	1.36	23.3	4.64	0.77	4.83	1.24	MALE	45	married	higher_education	>10000	NO	6to12	3	NO	NO	NO	NO
normal	1.32	22.9	4.64	1.35	4.87	0.93	MALE	61	married	senior_high_school	3000-5000	NO	6to12	3	NO	YES	NO	NO
normal	1.31	27.2	3.11	1.01	8.67	0.73	MALE	59	married	junior_high_school	5000to10000	YES	6to12	2	NO	YES	YES	YES
normal	1.28	22.4	3.72	1.18	5	0.98	MALE	47	married	senior_high_school	3000-5000	YES	6to12	6	YES	NO	NO	NO
normal	1.28	26	4.57	0.64	4.3	1.52	FEMALE	56	married	senior_high_school	3000-5000	NO	6to12	3	NO	NO	NO	NO
normal	1.21	27.5	5.09	1.45	5.22	1.16	MALE	57	married	senior_high_school	3000-5000	YES	6to12	4	NO	NO	NO	NO
normal	1.19	27.5	4.87	0.93	4.75	1.28	MALE	56	married	senior_high_school	3000-5000	YES	6to12	3	NO	YES	NO	NO
normal	1.09	21.6	3.96	0.64	5	1.43	FEMALE	47	married	junior_high_school	3000-5000	NO	6to12	4	NO	NO	NO	NO
normal	0.84	19.5	3.61	1.05	5.19	1.15	FEMALE	46	married	higher_education	3000-5000	NO	6to12	3	NO	NO	NO	NO
normal	3.7	28.4	6.19	2.49	15.77	1.04	MALE	46	married	senior_high_school	3000-5000	NO	6to12	3	YES	YES	YES	YES
normal	3.13	29.5	6.13	1.56	6.16	1.36	FEMALE	66	married	junior_high_school	3000-5000	NO	6to12	3	NO	YES	NO	YES
normal	3.06	26.8	5.78	3.42	4.93	1.2	MALE	66	married	junior_high_school	3000-5000	NO	6to12	2	YES	YES	NO	YES
normal	2.99	26.3	4.94	2.32	5.24	1.09	MALE	58	married	senior_high_school	3000-5000	NO	6to12	3	NO	NO	NO	YES
normal	2.7	21.9	5.15	2.84	4.63	1.04	FEMALE	79	married	senior_high_school	3000-5000	NO	6to12	3	NO	NO	NO	YES
normal	2.6	19.3	7.25	1.42	5.02	2.11	FEMALE	49	married	higher_education	3000-5000	NO	6to12	4	NO	NO	NO	YES
normal	2.39	23	5.3	0.94	5.24	1.48	FEMALE	59	married	senior_high_school	3000-5000	NO	6to12	2	NO	NO	NO	NO
normal	2.38	22.2	4.9	0.89	4.7	1.32	FEMALE	49	married	higher_education	3000-5000	NO	6to12	5	NO	NO	NO	NO
normal	2.34	30.3	4.6	2.34	5.13	1.5	FEMALE	63	married	illiteracy	<1000	NO	6to12	3	NO	NO	NO	YES
normal	2.29	29.1	4.72	2.08	7.25	1.07	FEMALE	63	married	junior_high_school	3000-5000	NO	6to12	4	NO	YES	YES	YES
normal	2.22	24.7	4.53	1.32	4.96	1.14	MALE	74	married	higher_education	3000-5000	NO	6to12	3	NO	NO	NO	NO
normal	2.1	21.7	5.14	1.04	7.4	1.18	MALE	60	married	junior_high_school	1000-3000	YES	6to12	3	NO	NO	NO	NO
normal	2.05	22.7	5.33	1.43	5.18	1.51	FEMALE	52	married	higher_education	5000to10000	NO	6to12	3	NO	YES	NO	NO
normal	1.98	29.1	3.5	1.09	9.89	0.65	MALE	58	married	senior_high_school	3000-5000	NO	6to12	4	NO	YES	NO	NO
normal	1.9	22.4	4.02	2.19	4.9	1.03	FEMALE	76	married	junior_high_school	1000-3000	NO	6to12	1	NO	YES	NO	YES
normal	1.89	23.8	5.6	2.31	5	1.16	FEMALE	52	married	junior_high_school	1000-3000	YES	6to12	2	NO	NO	NO	YES
normal	1.82	23.5	4.51	1.85	6.09	1.05	FEMALE	53	divorced	higher_education	1000-3000	NO	6to12	4	NO	NO	NO	YES
normal	1.75	26.2	3.78	2.39	5.34	0.75	MALE	51	married	higher_education	3000-5000	NO	6to12	3	NO	YES	NO	YES
normal	1.6	20	4.3	0.76	4.55	1.42	FEMALE	52	married	senior_high_school	3000-5000	NO	6to12	2	NO	NO	NO	NO
normal	1.56	26.5	4.89	2.44	5.81	1.07	MALE	43	married	higher_education	3000-5000	NO	6to12	3	NO	NO	NO	YES
normal	1.55	32.5	5.16	1.9	5.58	1	MALE	49	married	higher_education	3000-5000	NO	6to12	3	NO	NO	NO	YES
normal	1.51	26.9	4.75	2.97	6.03	1.07	MALE	57	married	higher_education	3000-5000	NO	6to12	5	NO	NO	NO	YES
normal	1.48	24.8	4.45	2.99	6.54	0.9	MALE	45	married	higher_education	3000-5000	YES	6to12	2	YES	YES	YES	YES
normal	1.46	19.8	4.69	5.83	7.62	1.09	FEMALE	63	married	junior_high_school	3000-5000	NO	6to12	4	NO	NO	NO	YES
normal	1.44	27	3.99	1.14	5.37	1.23	FEMALE	49	married	senior_high_school	3000-5000	NO	6to12	2	NO	YES	NO	NO
normal	1.4	27.2	4.51	0.63	5.55	1.41	MALE	64	married	higher_education	3000-5000	YES	6to12	2	YES	YES	NO	YES
normal	1.39	19.9	5.42	1.68	4.69	1.46	FEMALE	45	married	higher_education	3000-5000	NO	6to12	3	NO	NO	NO	NO
normal	1.3	25	4.32	0.84	5.79	1.39	FEMALE	61	married	junior_high_school	1000-3000	NO	6to12	2	NO	YES	NO	NO
normal	1.26	23.8	4.12	1.83	4.58	1.15	MALE	50	married	higher_education	3000-5000	NO	6to12	2	NO	YES	NO	YES
normal	0.87	21.1	4.77	1.91	4.48	0.98	MALE	70	married	higher_education	3000-5000	YES	6to12	5	NO	NO	NO	YES
normal	4.05	25.7	7.04	3.1	5.83	1.27	FEMALE	50	married	higher_education	3000-5000	NO	6to12	4	NO	NO	NO	YES
normal	3.33	22.3	6.9	18.02	5.42	1.12	FEMALE	61	married	illiteracy	1000-3000	NO	6to12	3	NO	NO	NO	YES
normal	3.24	31.1	5.98	2.75	5.56	1.11	MALE	49	married	higher_education	3000-5000	NO	6to12	4	NO	NO	NO	YES
normal	3.22	27.5	6.45	2.04	6.01	1.28	FEMALE	48	married	higher_education	5000to10000	NO	6to12	2	NO	YES	YES	YES
normal	3.04	21.6	5.35	1.84	5.55	1.16	FEMALE	56	married	higher_education	5000to10000	NO	6to12	3	NO	NO	NO	YES
normal	2.94	26.5	5.36	1.64	6.34	1.1	MALE	66	married	junior_high_school	3000-5000	NO	6to12	3	NO	YES	NO	NO
normal	2.89	24.6	6.2	1.75	5.67	1.08	MALE	69	married	junior_high_school	3000-5000	NO	6to12	4	YES	YES	YES	YES
normal	2.68	28.8	5.11	1.56	5	1.16	MALE	65	married	junior_high_school	1000-3000	YES	6to12	2	YES	YES	NO	YES
normal	2.59	22.5	4.82	2.08	6.36	0.87	MALE	70	married	primary_school	3000-5000	NO	6to12	3	NO	YES	NO	YES
normal	2.55	23.8	5.69	3.19	5.17	1.06	FEMALE	64	married	senior_high_school	5000to10000	NO	6to12	2	NO	YES	NO	YES
normal	2.53	23.5	5.28	0.94	5.18	1.45	MALE	69	married	higher_education	3000-5000	NO	6to12	2	YES	YES	NO	NO
normal	2.52	30.9	4.98	2.26	5.6	1.04	FEMALE	47	married	senior_high_school	3000-5000	NO	6to12	5	NO	YES	NO	YES
normal	2.48	23.7	4.86	0.6	5.27	1.29	MALE	51	married	higher_education	3000-5000	YES	6to12	3	NO	NO	NO	NO
normal	2.44	25.6	4.6	0.83	4.8	1.03	MALE	70	married	primary_school	3000-5000	NO	6to12	5	NO	NO	NO	NO
normal	2.41	28.7	4.7	1.95	5.63	1.09	MALE	65	married	illiteracy	1000-3000	YES	6to12	1	YES	NO	NO	YES
normal	2.31	20.2	7.85	1.45	6.73	1.55	FEMALE	62	married	senior_high_school	3000-5000	NO	6to12	2	NO	NO	NO	YES
normal	2.31	23.7	5.05	0.78	5.72	1.42	FEMALE	64	married	primary_school	1000-3000	NO	6to12	2	NO	NO	NO	NO
normal	2.28	28.3	6.41	3.76	14.49	1.18	MALE	48	married	higher_education	3000-5000	NO	6to12	4	YES	YES	NO	YES
normal	2.21	28.8	4.52	5.99	6.9	0.95	MALE	57	married	senior_high_school	3000-5000	NO	6to12	5	NO	YES	NO	YES
normal	2.17	25	4.53	1.61	4.66	1.18	FEMALE	49	married	higher_education	3000-5000	NO	6to12	3	NO	NO	NO	NO
normal	2.17	23.3	4.62	0.85	5.26	1.23	MALE	52	married	higher_education	3000-5000	NO	6to12	4	NO	NO	NO	NO
normal	2.12	23.8	6.33	4.55	5.26	1.15	MALE	64	married	higher_education	3000-5000	Quitting	6to12	5	NO	NO	YES	YES
normal	2.09	28.7	4.83	2.77	6.43	0.93	MALE	58	married	senior_high_school	3000-5000	NO	6to12	5	NO	YES	NO	YES
normal	2.03	23.5	5.74	1.95	6.27	1.37	MALE	49	married	higher_education	3000-5000	Quitting	6to12	4	YES	YES	NO	YES
normal	1.91	22.9	4.49	1.39	5.1	1.39	FEMALE	45	married	higher_education	3000-5000	NO	6to12	5	NO	YES	NO	NO
normal	1.67	24.6	3.61	0.89	5.49	1.05	MALE	56	married	senior_high_school	1000-3000	NO	6to12	3	NO	YES	NO	NO
normal	1.63	25.6	5.47	2.07	4.44	1.25	MALE	58	married	senior_high_school	3000-5000	YES	6to12	2	NO	YES	NO	YES
normal	1.24	26.3	5.09	1.62	5.21	1.31	FEMALE	48	married	junior_high_school	3000-5000	NO	6to12	3	NO	NO	NO	NO
normal	1.24	26	4.6	3.58	5.9	0.91	MALE	50	married	senior_high_school	3000-5000	NO	6to12	3	NO	YES	NO	YES
normal	1.13	22.4	3.3	1.76	6.04	1.14	MALE	54	married	senior_high_school	3000-5000	NO	6to12	3	NO	YES	YES	YES
normal	1.1	22.9	4.33	2.29	4.47	1.12	FEMALE	76	married	senior_high_school	3000-5000	NO	6to12	4	NO	YES	NO	YES
normal	1.07	23.3	3.93	1.22	6.54	1.09	FEMALE	67	married	junior_high_school	3000-5000	NO	6to12	4	NO	YES	YES	NO
normal	1	22.9	3.3	0.67	4.77	1.54	FEMALE	54	married	higher_education	3000-5000	NO	6to12	4	NO	NO	NO	NO
normal	0.81	27	3.07	1.32	9.66	0.82	MALE	51	married	junior_high_school	3000-5000	Quitting	6to12	3	NO	NO	YES	NO
normal	5.76	22.9	9.19	0.76	4.73	1.29	MALE	33	married	higher_education	3000-5000	NO	6to12	4	NO	NO	NO	YES
normal	5.28	20.5	8.72	2.38	5.01	1.4	FEMALE	51	married	senior_high_school	3000-5000	NO	6to12	3	NO	NO	NO	YES
normal	4.54	40.9	7.3	2	9.06	1.19	MALE	34	married	higher_education	3000-5000	NO	6to12	4	NO	YES	NO	YES
normal	4.53	23.9	7.42	1.05	4.84	1.04	FEMALE	31	married	higher_education	3000-5000	NO	6to12	3	NO	NO	NO	YES
normal	4.42	19.7	8.53	0.74	4.67	1.98	MALE	35	married	higher_education	3000-5000	NO	6to12	3	NO	NO	NO	YES
normal	4.12	37.5	6.76	1.5	4.75	1.13	MALE	33	married	higher_education	3000-5000	NO	6to12	2	NO	NO	NO	YES
normal	4.11	24.2	7.06	2.08	5.8	1.09	MALE	65	married	junior_high_school	3000-5000	Quitting	6to12	4	NO	YES	NO	YES
normal	4.08	26	7.1	3.96	5.23	1.05	MALE	33	married	higher_education	3000-5000	YES	6to12	4	YES	NO	NO	YES
normal	3.99	24.1	6.84	0.83	5.12	1.37	FEMALE	41	married	higher_education	3000-5000	NO	6to12	5	NO	NO	NO	YES
normal	3.92	27.1	7.05	5.1	5.73	1.36	MALE	34	married	higher_education	3000-5000	Quitting	6to12	3	YES	YES	NO	YES
normal	3.89	26.9	6.67	1.93	4.95	1.35	FEMALE	29	married	higher_education	3000-5000	NO	6to12	4	NO	NO	NO	YES
normal	3.86	24.1	7.25	1.72	5.18	1.36	FEMALE	55	married	senior_high_school	1000-3000	NO	6to12	5	NO	YES	NO	YES
normal	3.85	26.1	6.62	3.04	5.46	1.17	MALE	37	married	higher_education	3000-5000	NO	6to12	3	NO	NO	NO	YES
normal	3.83	27.3	7.08	5.42	5.1	1.31	MALE	43	married	senior_high_school	3000-5000	YES	6to12	2	YES	YES	NO	YES
normal	3.83	24	7.02	1.08	4.87	1.45	FEMALE	42	married	senior_high_school	3000-5000	NO	6to12	4	NO	NO	NO	YES
normal	3.8	24.2	7.72	1.04	5.25	1.42	FEMALE	36	married	higher_education	3000-5000	NO	6to12	4	NO	NO	NO	YES
normal	3.78	28.3	6.52	1.16	5.09	1.12	MALE	31	married	higher_education	3000-5000	NO	6to12	3	NO	YES	NO	YES
normal	3.77	29.7	6.4	9	4.65	0.94	MALE	40	married	higher_education	3000-5000	YES	6to12	3	YES	NO	NO	YES
normal	3.76	31.5	6.64	1.92	6.85	1.2	FEMALE	33	married	higher_education	3000-5000	NO	6to12	4	NO	YES	NO	YES
normal	3.75	21.5	6.63	0.99	5.1	1.61	FEMALE	37	married	senior_high_school	3000-5000	NO	6to12	4	NO	NO	NO	YES
normal	3.73	22	6.9	0.78	5.02	1.47	MALE	51	married	senior_high_school	3000-5000	YES	6to12	2	YES	NO	NO	YES
normal	3.72	32.3	5.96	1.46	5.39	1.22	MALE	34	married	senior_high_school	3000-5000	NO	6to12	5	NO	YES	NO	YES
normal	3.72	27.1	6.55	4.01	4.67	1.1	MALE	28	married	higher_education	3000-5000	NO	6to12	3	NO	NO	NO	YES
normal	3.7	28.4	6.1	2.19	4.89	1.04	FEMALE	40	married	higher_education	3000-5000	NO	6to12	4	NO	NO	NO	YES
normal	3.65	20.5	6.4	0.89	5.87	1.31	MALE	23	spinsterhood	senior_high_school	3000-5000	NO	6to12	5	NO	NO	NO	YES
normal	3.6	23.6	6.78	0.84	9.63	1.41	MALE	65	married	junior_high_school	5000to10000	NO	6to12	3	NO	YES	YES	YES
normal	3.59	26.9	6.68	2.93	5.87	1.12	MALE	44	married	higher_education	3000-5000	NO	6to12	4	NO	YES	NO	YES
normal	3.57	26.5	7.13	2.94	4.92	1.34	MALE	42	married	higher_education	3000-5000	NO	6to12	3	NO	NO	NO	YES
normal	3.57	28.7	5.91	2.72	6.58	0.94	MALE	32	married	higher_education	3000-5000	YES	6to12	4	NO	NO	NO	YES
normal	3.56	26.4	6.99	1.52	5.08	1.45	MALE	40	married	higher_education	3000-5000	YES	6to12	3	YES	NO	NO	YES
normal	3.52	23.8	6.52	1.83	4.89	1.17	MALE	34	married	higher_education	3000-5000	Quitting	6to12	4	NO	NO	NO	YES
normal	3.51	26.4	6.37	3.05	5.3	1.14	MALE	38	married	higher_education	3000-5000	NO	6to12	4	YES	YES	NO	YES
normal	3.51	28.6	6.41	3.03	4.99	1.21	MALE	33	married	higher_education	3000-5000	YES	6to12	4	YES	NO	NO	YES
normal	3.49	32.7	6.38	7.79	5.36	1.09	FEMALE	28	married	higher_education	3000-5000	NO	6to12	4	NO	NO	NO	YES
normal	3.47	30.3	5.92	3.16	4.89	0.98	FEMALE	34	married	higher_education	3000-5000	NO	6to12	4	NO	NO	NO	YES
normal	3.46	26.2	6.23	2.26	5.4	1.18	MALE	38	married	higher_education	3000-5000	YES	6to12	3	NO	NO	NO	YES
normal	3.45	21.6	6.04	2.52	14.74	1.02	MALE	38	married	higher_education	3000-5000	NO	6to12	3	NO	NO	NO	YES
normal	3.42	24.2	5.76	1.53	5.16	0.92	MALE	26	married	higher_education	3000-5000	YES	6to12	3	NO	YES	NO	YES
normal	3.41	27.1	6.61	0.79	5.85	1.78	MALE	44	married	senior_high_school	3000-5000	YES	6to12	3	NO	NO	NO	YES
normal	3.41	26.6	5.79	1.49	7.57	0.98	MALE	38	spinsterhood	senior_high_school	1000-3000	YES	6to12	3	NO	YES	NO	YES
normal	3.41	25.5	6.33	1.66	4.82	1.2	FEMALE	32	married	higher_education	3000-5000	NO	6to12	4	NO	NO	NO	YES
normal	3.41	27	6.02	4.02	5.49	1.03	MALE	33	married	higher_education	3000-5000	YES	6to12	4	NO	YES	NO	YES
normal	3.41	26.6	6.11	1.59	5.25	1.01	MALE	31	spinsterhood	higher_education	3000-5000	YES	6to12	5	YES	NO	NO	YES
normal	3.4	24.9	6.27	1.89	5.33	1.05	MALE	41	married	senior_high_school	3000-5000	YES	6to12	3	NO	YES	NO	YES
normal	3.4	31.8	6.04	2.9	5.15	1.05	MALE	33	married	higher_education	3000-5000	NO	6to12	4	NO	NO	NO	YES
normal	3.36	25.3	6.63	4.17	5.6	1.11	MALE	36	married	higher_education	3000-5000	YES	6to12	3	NO	NO	NO	YES
normal	3.36	27.2	6.21	2.34	6.47	1.18	MALE	38	married	higher_education	3000-5000	NO	6to12	2	NO	NO	YES	YES
normal	3.34	28.5	6.07	10.04	5.29	0.96	MALE	31	married	higher_education	3000-5000	YES	6to12	3	YES	NO	NO	YES
normal	3.33	22.7	6	2.04	5.33	1.1	MALE	36	married	higher_education	3000-5000	NO	6to12	4	NO	NO	NO	YES
normal	3.32	29.2	6.45	5.18	6.96	1.25	MALE	43	married	higher_education	3000-5000	NO	6to12	3	YES	NO	NO	YES
normal	3.32	24	6.05	3.36	5.47	1.32	MALE	38	married	higher_education	3000-5000	NO	6to12	4	NO	NO	NO	YES
normal	3.31	32	5.88	3.47	8.32	1.02	MALE	37	married	senior_high_school	3000-5000	NO	6to12	4	NO	YES	NO	YES
normal	3.3	24.1	5.91	1.12	5.3	1.09	MALE	42	married	senior_high_school	3000-5000	YES	6to12	3	YES	NO	NO	YES
normal	3.28	26.4	5.9	1.34	5.68	1.14	MALE	34	married	higher_education	3000-5000	NO	6to12	5	YES	NO	NO	YES
normal	3.26	27.6	6.38	5.89	10.1	1.17	MALE	42	married	senior_high_school	3000-5000	YES	6to12	3	NO	NO	NO	YES
normal	3.26	20.8	6.03	1.2	4.75	1.2	FEMALE	42	married	higher_education	3000-5000	NO	6to12	4	NO	NO	NO	YES
normal	3.25	25.9	6.47	3.46	6.65	1.25	MALE	29	spinsterhood	higher_education	3000-5000	NO	6to12	3	NO	NO	NO	YES
normal	3.25	33.9	12.44	19.76	17.71	1.89	FEMALE	40	married	higher_education	3000-5000	NO	6to12	4	NO	YES	NO	YES
normal	3.24	28.3	5.99	3.48	4.33	1.25	MALE	32	married	higher_education	3000-5000	YES	6to12	3	YES	NO	NO	YES
normal	3.24	20.8	6.3	3.41	4.35	1.13	MALE	40	married	higher_education	3000-5000	YES	6to12	5	NO	NO	NO	YES
normal	3.24	26.3	6.01	2.61	5.66	1.29	MALE	34	married	higher_education	3000-5000	NO	6to12	4	YES	YES	NO	YES
normal	3.23	33.5	5.95	3.63	6.55	1.05	MALE	36	married	higher_education	3000-5000	YES	6to12	2	YES	NO	NO	YES
normal	3.22	29.3	6.01	5.39	6.17	1.01	MALE	37	married	higher_education	5000to10000	YES	6to12	3	NO	NO	NO	YES
normal	3.21	23	6	2.53	5.12	1.36	FEMALE	43	married	senior_high_school	3000-5000	NO	6to12	4	NO	YES	NO	YES
normal	3.21	26.2	5.72	2.12	5.06	1.09	MALE	33	married	higher_education	3000-5000	YES	6to12	4	YES	NO	NO	YES
normal	3.21	27.7	6.01	1.71	6.01	1.22	MALE	34	married	higher_education	3000-5000	NO	6to12	4	NO	YES	NO	YES
normal	3.19	24.8	5.62	1.53	4.82	1.12	FEMALE	51	married	higher_education	3000-5000	NO	6to12	3	NO	NO	NO	NO
normal	3.19	32.6	5.37	2.85	5.65	0.9	MALE	33	married	higher_education	3000-5000	NO	6to12	4	NO	NO	NO	YES
normal	3.18	38.6	6.36	2.34	6.02	1.1	MALE	44	married	senior_high_school	3000-5000	YES	6to12	3	NO	YES	NO	YES
normal	3.18	22.1	6.26	1.32	4.74	1.83	FEMALE	38	married	higher_education	3000-5000	NO	6to12	2	NO	NO	NO	YES
normal	3.18	30.3	5.89	4.33	4.85	1.05	MALE	38	married	higher_education	3000-5000	NO	6to12	4	NO	NO	NO	YES
normal	3.18	26.9	6.29	2.56	5.55	1.25	MALE	30	spinsterhood	senior_high_school	3000-5000	YES	6to12	5	YES	YES	NO	YES
normal	3.18	27.3	5.3	1.49	5.07	0.8	MALE	23	spinsterhood	higher_education	3000-5000	YES	6to12	5	NO	NO	NO	NO
normal	3.17	26.6	6.45	1.91	10.07	1.07	FEMALE	36	married	junior_high_school	3000-5000	YES	6to12	4	NO	NO	YES	YES
normal	3.17	27.3	5.93	1.97	5.39	1.11	MALE	42	married	higher_education	3000-5000	YES	6to12	4	NO	NO	NO	YES
normal	3.16	26.7	5.81	1.67	6.16	1.13	MALE	37	married	higher_education	3000-5000	NO	6to12	4	NO	NO	NO	YES
normal	3.15	25.2	6.14	3.32	5.5	1.1	MALE	40	married	higher_education	3000-5000	NO	6to12	3	NO	NO	NO	YES
normal	3.15	20.4	5.93	1.48	4.99	1.55	FEMALE	28	married	higher_education	3000-5000	NO	6to12	4	NO	NO	NO	YES
normal	3.14	31.9	5.79	1.93	4.71	1.06	FEMALE	36	married	higher_education	3000-5000	NO	6to12	3	NO	NO	NO	YES
normal	3.14	26.1	6.2	1.17	5.6	1.14	MALE	52	married	junior_high_school	3000-5000	YES	6to12	4	YES	NO	NO	YES
normal	3.13	24.5	5.68	1.3	4.72	1.24	MALE	32	married	higher_education	3000-5000	NO	6to12	5	NO	NO	NO	NO
normal	3.13	19	6.62	0.68	5.51	2.08	FEMALE	29	spinsterhood	higher_education	3000-5000	NO	6to12	4	NO	NO	NO	YES
normal	3.13	29	5.87	1.75	4.98	1.13	MALE	31	married	higher_education	3000-5000	YES	6to12	3	NO	NO	NO	YES
normal	3.12	30.7	5.98	8.23	5.28	1.12	MALE	37	married	higher_education	3000-5000	YES	6to12	4	NO	YES	NO	YES
normal	3.11	31.1	6.46	5.64	5.18	1.1	MALE	37	married	higher_education	3000-5000	YES	6to12	3	YES	NO	NO	YES
normal	3.11	25.5	5.82	2.06	6.18	1.14	MALE	33	married	higher_education	3000-5000	YES	6to12	3	YES	NO	NO	YES
normal	3.11	28.9	5.38	1.78	4.4	0.94	MALE	27	married	junior_high_school	3000-5000	YES	6to12	3	NO	NO	NO	YES
normal	3.1	25.4	5.19	3.44	4.74	1.07	FEMALE	38	married	higher_education	3000-5000	NO	6to12	4	NO	NO	NO	YES
normal	3.1	32.3	7.68	10.21	5	1.24	MALE	41	married	junior_high_school	3000-5000	YES	6to12	3	NO	NO	NO	YES
normal	3.1	33.5	5.49	1.34	5.36	1.09	MALE	24	spinsterhood	senior_high_school	3000-5000	NO	6to12	4	NO	YES	NO	NO
normal	3.09	21.3	6.28	1.24	5.2	1.88	FEMALE	32	married	higher_education	3000-5000	NO	6to12	4	NO	NO	NO	YES
normal	3.08	30.2	6.59	2.78	5.51	1.11	MALE	41	married	higher_education	3000-5000	NO	6to12	5	YES	NO	NO	YES
normal	3.08	21.2	5.76	0.86	5.31	1.51	FEMALE	42	married	higher_education	3000-5000	NO	6to12	5	NO	NO	NO	YES
normal	3.08	26.2	7.15	0.82	4.8	1.94	FEMALE	41	married	senior_high_school	3000-5000	NO	6to12	4	NO	NO	NO	YES
normal	3.07	22.3	6.05	0.99	5.01	1.04	FEMALE	32	married	higher_education	1000-3000	NO	6to12	4	NO	NO	NO	YES
normal	3.07	22.3	6.05	0.99	5.01	1.04	FEMALE	32	married	higher_education	1000-3000	NO	6to12	4	NO	NO	NO	YES
normal	3.06	26.8	6.52	1.06	5	1.17	MALE	36	married	higher_education	3000-5000	YES	6to12	4	YES	NO	NO	YES
normal	3.04	30.2	5.51	1.39	4.66	0.97	MALE	37	married	higher_education	3000-5000	YES	6to12	4	NO	YES	NO	NO
normal	3.04	22.6	6.46	4.35	4.4	1.11	FEMALE	39	married	higher_education	3000-5000	NO	6to12	4	NO	NO	NO	YES
normal	3.04	25.2	5.31	1.34	5.14	0.93	FEMALE	28	married	senior_high_school	3000-5000	NO	6to12	4	NO	NO	NO	NO
normal	3.04	23.6	5.74	1.97	4.74	1.11	MALE	28	married	higher_education	3000-5000	NO	6to12	4	NO	NO	NO	YES
normal	3.04	26.2	5.21	2.52	6.18	0.89	MALE	37	married	senior_high_school	3000-5000	YES	6to12	6	NO	NO	NO	YES
normal	3.04	24	5.99	1.29	4.98	1.12	FEMALE	33	spinsterhood	higher_education	3000-5000	NO	6to12	4	NO	NO	NO	YES
normal	3.03	24.3	6.17	1.97	4.97	1.09	MALE	39	married	higher_education	3000-5000	YES	6to12	3	NO	YES	NO	YES
normal	3.03	25.5	5.73	3.4	6.9	1.12	MALE	49	married	higher_education	3000-5000	YES	6to12	4	YES	YES	NO	YES
normal	3.02	23.1	5.91	1.46	5.45	1.37	MALE	49	married	higher_education	3000-5000	YES	6to12	2	YES	NO	NO	YES
normal	3.02	22.1	6.12	2.07	4.67	1.15	FEMALE	64	married	senior_high_school	1000-3000	NO	6to12	2	NO	NO	NO	YES
normal	3.02	26.1	5.77	1.23	4.87	1.26	FEMALE	31	married	senior_high_school	3000-5000	NO	6to12	4	NO	NO	NO	YES
normal	3.01	26.2	6.07	1.21	4.8	1.46	FEMALE	39	married	senior_high_school	3000-5000	NO	6to12	3	NO	NO	NO	YES
normal	2.99	24.1	5.86	1.55	5.24	1.22	MALE	56	married	senior_high_school	3000-5000	YES	6to12	3	NO	NO	NO	YES
normal	2.99	29.5	5.67	2.41	4.81	1.05	MALE	27	married	higher_education	3000-5000	NO	6to12	3	NO	NO	NO	YES
normal	2.99	25.3	5.33	1.25	4.95	1.17	MALE	24	spinsterhood	higher_education	3000-5000	NO	6to12	4	NO	NO	NO	NO
normal	2.98	27.8	5.87	2.25	6.27	1.36	FEMALE	56	married	higher_education	3000-5000	NO	6to12	4	YES	NO	NO	YES
normal	2.98	27.9	5.47	1.7	4.53	1.17	MALE	37	married	higher_education	3000-5000	NO	6to12	5	NO	NO	NO	YES
normal	2.98	28.1	5.22	2.05	5.05	0.81	MALE	37	married	higher_education	3000-5000	NO	6to12	4	NO	NO	NO	YES
normal	2.98	24.9	5.35	2.68	5.01	0.89	FEMALE	37	married	higher_education	3000-5000	NO	6to12	4	NO	NO	NO	YES
normal	2.98	25.4	5.62	0.95	5.53	1.24	FEMALE	41	married	higher_education	3000-5000	NO	6to12	4	NO	NO	NO	NO
normal	2.97	22.3	5.36	2.42	4.56	0.99	MALE	32	married	higher_education	3000-5000	YES	6to12	4	NO	NO	NO	YES
normal	2.97	24	5.35	1.11	5.78	1.02	MALE	36	married	higher_education	3000-5000	NO	6to12	5	NO	NO	NO	NO
normal	2.97	25.9	5.92	1.21	5.21	1.01	MALE	44	married	higher_education	3000-5000	YES	6to12	3	NO	YES	NO	YES
normal	2.97	23.1	5.09	0.98	4.81	0.83	MALE	24	spinsterhood	higher_education	3000-5000	YES	6to12	5	NO	NO	NO	NO
normal	2.97	36.2	6.06	1.03	7.87	1.44	FEMALE	52	married	junior_high_school	3000-5000	NO	6to12	2	NO	YES	YES	YES
normal	2.96	27.5	6.25	1.4	6.29	1.36	MALE	44	married	senior_high_school	3000-5000	YES	6to12	3	NO	YES	NO	YES
normal	2.95	24.5	5.6	1.93	5.54	1.04	MALE	51	married	higher_education	1000-3000	NO	6to12	3	NO	YES	NO	YES
normal	2.95	31.5	5.75	5.85	5.22	1.05	MALE	28	married	higher_education	3000-5000	NO	6to12	5	NO	YES	NO	YES
normal	2.94	19.7	6.52	1.02	5.54	1.34	FEMALE	49	married	senior_high_school	3000-5000	NO	6to12	5	NO	NO	NO	YES
normal	2.94	25.2	5.23	2.61	8.69	1	MALE	39	married	senior_high_school	3000-5000	YES	6to12	3	YES	NO	NO	YES
normal	2.94	32	5.41	3.11	6.81	0.96	MALE	33	married	senior_high_school	3000-5000	YES	6to12	4	YES	YES	NO	YES
normal	2.94	24.5	5.81	1.72	6.35	1.3	MALE	32	married	higher_education	3000-5000	Quitting	6to12	5	YES	NO	NO	YES
normal	2.93	23.2	6.68	3.2	7.02	1.32	FEMALE	38	married	higher_education	3000-5000	NO	6to12	3	NO	YES	NO	YES
normal	2.93	25	5.45	1.75	4.58	1.13	FEMALE	34	married	higher_education	3000-5000	NO	6to12	5	NO	NO	NO	YES
normal	2.92	20.6	4.89	0.96	5.09	1.21	FEMALE	31	married	higher_education	3000-5000	NO	6to12	5	NO	NO	NO	NO
normal	2.91	26.9	5.07	1	5.52	0.99	MALE	36	married	higher_education	3000-5000	YES	6to12	4	YES	NO	NO	NO
normal	2.9	21.5	5.41	1.49	5.17	1.14	MALE	34	married	higher_education	1000-3000	NO	6to12	3	NO	NO	NO	NO
normal	2.9	25.5	7.04	5.85	5.37	1.2	MALE	39	married	higher_education	3000-5000	Quitting	6to12	3	YES	NO	NO	YES
normal	2.9	27.1	5.35	2.11	4.98	0.97	FEMALE	37	married	higher_education	3000-5000	NO	6to12	3	NO	NO	NO	YES
normal	2.89	24.9	5.98	2.13	5.56	1.21	MALE	42	married	higher_education	3000-5000	YES	6to12	3	YES	NO	NO	YES
normal	2.89	18.4	5.16	1.17	4.85	1.25	FEMALE	34	married	higher_education	3000-5000	NO	6to12	5	NO	NO	NO	NO
normal	2.89	20.3	5.6	0.66	5.5	1.48	FEMALE	41	married	higher_education	3000-5000	NO	6to12	4	NO	NO	NO	NO
normal	2.88	31.3	6.85	2.86	4.78	1.07	MALE	34	married	higher_education	3000-5000	NO	6to12	3	NO	NO	NO	YES
normal	2.88	21.8	5.03	1.71	5.49	0.85	MALE	74	married	junior_high_school	3000-5000	YES	6to12	3	NO	YES	NO	YES
normal	2.88	38.2	4.53	1.73	6.02	0.77	FEMALE	28	married	senior_high_school	3000-5000	NO	6to12	4	NO	YES	NO	YES
normal	2.88	22.8	5.82	1.03	5.24	1.58	FEMALE	30	spinsterhood	higher_education	3000-5000	NO	6to12	4	NO	NO	NO	YES
normal	2.88	23	6.95	1.53	5.11	1.34	MALE	28	married	higher_education	3000-5000	NO	6to12	4	YES	NO	NO	YES
normal	2.87	24.2	5.09	3.06	5.59	0.89	MALE	33	married	higher_education	3000-5000	YES	6to12	4	NO	NO	NO	YES
normal	2.87	20.8	5.02	1.55	5.25	1.31	MALE	38	married	junior_high_school	1000-3000	YES	6to12	4	YES	NO	NO	NO
normal	2.86	29.1	5.14	1.13	5.17	0.81	MALE	43	married	higher_education	3000-5000	YES	6to12	4	YES	NO	NO	NO
normal	2.86	23	5.59	1.6	4.59	1.32	MALE	41	married	higher_education	3000-5000	YES	6to12	3	YES	YES	NO	NO
normal	2.86	22.3	5.9	1.46	5.52	1.81	FEMALE	50	married	higher_education	3000-5000	NO	6to12	4	NO	NO	NO	YES
normal	2.86	28.5	4.64	2.19	4.91	0.9	MALE	66	married	junior_high_school	1000-3000	YES	6to12	3	YES	NO	NO	YES
normal	2.85	24.3	5.74	1.24	5.06	1.43	FEMALE	55	married	junior_high_school	3000-5000	NO	6to12	3	NO	YES	NO	YES
normal	2.85	26.1	5.92	2.11	5.39	1.22	MALE	40	married	higher_education	3000-5000	YES	6to12	4	YES	NO	NO	YES
normal	2.84	27.1	5.32	1.21	5.28	1.25	MALE	37	married	higher_education	3000-5000	YES	6to12	4	YES	NO	NO	NO
normal	2.83	28.4	5.7	1.64	5.09	1.26	MALE	42	married	higher_education	3000-5000	YES	6to12	4	NO	NO	NO	YES
normal	2.83	19	6.06	1.58	5.54	1.56	FEMALE	34	married	higher_education	3000-5000	NO	6to12	4	NO	NO	NO	YES
normal	2.83	19	6.06	1.58	5.54	1.56	FEMALE	34	married	higher_education	3000-5000	NO	6to12	4	NO	NO	NO	YES
normal	2.83	26.6	5.41	2.15	5.14	1.1	MALE	73	married	primary_school	3000-5000	YES	6to12	3	NO	NO	NO	YES
normal	2.83	23.5	5.87	2	5.12	1.34	FEMALE	64	married	higher_education	3000-5000	NO	6to12	4	NO	NO	NO	YES
normal	2.83	22.8	5.71	1.96	5.55	1.37	FEMALE	29	spinsterhood	higher_education	3000-5000	NO	6to12	4	NO	NO	NO	YES
normal	2.82	22.6	5.56	0.67	4.99	1.26	FEMALE	35	married	higher_education	3000-5000	NO	6to12	4	NO	NO	NO	NO
normal	2.82	25	5.48	1.73	4.75	1.17	FEMALE	36	married	higher_education	3000-5000	NO	6to12	4	NO	NO	NO	YES
normal	2.82	34.1	5.42	2.49	5.18	0.97	MALE	36	married	higher_education	3000-5000	NO	6to12	2	NO	NO	NO	YES
normal	2.81	24.3	5.15	1.48	4.68	0.87	MALE	29	married	higher_education	3000-5000	NO	6to12	3	NO	NO	NO	NO
normal	2.81	22.3	5.4	1.22	5.25	1.34	FEMALE	44	married	senior_high_school	3000-5000	NO	6to12	3	NO	NO	NO	NO
normal	2.8	25.7	5.24	2.33	5	0.95	MALE	38	married	senior_high_school	3000-5000	NO	6to12	4	NO	NO	NO	YES
normal	2.8	27.8	5.52	2.91	5.01	1.21	MALE	40	married	higher_education	3000-5000	YES	6to12	2	YES	YES	NO	YES
normal	2.8	24.3	6.04	1.43	4.68	1.33	MALE	34	married	higher_education	3000-5000	YES	6to12	4	YES	NO	NO	YES
normal	2.8	25.4	5.34	1.68	5.49	1.32	MALE	32	married	higher_education	1000-3000	NO	6to12	4	YES	YES	NO	NO
normal	2.8	22.6	5.31	3.68	5.21	1.05	FEMALE	29	married	senior_high_school	3000-5000	NO	6to12	5	NO	NO	NO	YES
normal	2.8	22.9	5.25	1.82	6.1	1.05	MALE	29	spinsterhood	higher_education	3000-5000	NO	6to12	4	NO	NO	NO	YES
normal	2.79	20.5	5.63	0.92	4.64	1.43	MALE	47	married	higher_education	3000-5000	NO	6to12	5	NO	NO	NO	NO
normal	2.79	25.7	5.32	1.54	5.2	1	MALE	34	married	higher_education	3000-5000	NO	6to12	4	NO	YES	NO	NO
normal	2.79	24.2	6.48	1.48	4.71	1.85	FEMALE	40	married	higher_education	3000-5000	NO	6to12	3	NO	NO	NO	YES
normal	2.79	23.9	5.25	2.64	5.67	1	MALE	36	married	higher_education	3000-5000	YES	6to12	3	NO	NO	NO	YES
normal	2.79	24.8	5.82	1.36	5.25	1.38	MALE	37	married	higher_education	3000-5000	NO	6to12	4	NO	YES	NO	YES
normal	2.79	37.7	6.15	2.06	4.79	1.11	MALE	33	married	higher_education	3000-5000	YES	6to12	3	YES	NO	NO	YES
normal	2.79	24	5.3	1.92	4.98	1.13	MALE	27	married	higher_education	3000-5000	Quitting	6to12	4	NO	NO	NO	YES
normal	2.78	29.2	4.92	1.87	4.55	0.89	MALE	37	married	senior_high_school	3000-5000	YES	6to12	4	NO	YES	NO	YES
normal	2.78	27.3	6.07	3.73	4.84	1.1	MALE	32	married	higher_education	3000-5000	NO	6to12	3	NO	NO	NO	YES
normal	2.78	23.3	4.86	1.17	5.92	0.91	MALE	32	married	higher_education	3000-5000	NO	6to12	3	NO	NO	NO	NO
normal	2.77	23.3	5.06	1.51	4.67	1.05	MALE	31	married	higher_education	3000-5000	YES	6to12	4	NO	YES	NO	NO
normal	2.77	20.6	5.23	1.13	5.24	1.08	FEMALE	40	married	higher_education	3000-5000	NO	6to12	2	NO	NO	NO	NO
normal	2.77	25.7	5.24	1.81	4.91	1.13	FEMALE	33	married	higher_education	3000-5000	NO	6to12	3	NO	NO	NO	YES
normal	2.77	21.3	5.4	2.28	5.19	1.15	FEMALE	33	married	higher_education	3000-5000	NO	6to12	4	YES	NO	NO	YES
normal	2.77	19.6	6.36	0.57	4.79	2.26	FEMALE	32	married	higher_education	3000-5000	NO	6to12	4	NO	NO	NO	YES
normal	2.77	22.6	5.51	1.1	4.68	1.22	MALE	36	married	higher_education	3000-5000	NO	6to12	3	NO	NO	NO	NO
normal	2.77	26.9	5.58	1.65	5.02	1.29	FEMALE	26	married	higher_education	3000-5000	NO	6to12	5	NO	NO	NO	NO
normal	2.76	26.1	6.27	1.51	5.41	1.32	MALE	35	married	higher_education	3000-5000	NO	6to12	4	YES	NO	NO	YES
normal	2.76	27.4	5.67	6.48	5.11	1.02	MALE	33	married	higher_education	3000-5000	NO	6to12	4	YES	NO	NO	YES
normal	2.76	25.2	5.53	3.15	4.95	1.04	MALE	34	married	higher_education	3000-5000	NO	6to12	5	NO	NO	NO	YES
normal	2.76	26.3	5.35	1.26	5.31	1.44	FEMALE	37	married	senior_high_school	3000-5000	NO	6to12	3	NO	NO	NO	NO
normal	2.75	27.5	4.85	1.82	5.11	0.89	FEMALE	34	married	higher_education	3000-5000	NO	6to12	4	NO	NO	NO	YES
normal	2.74	26.7	5.11	3.18	5.29	0.96	FEMALE	37	married	higher_education	3000-5000	NO	6to12	4	NO	NO	NO	YES
normal	2.74	24.3	5.66	2.2	5.6	0.96	MALE	35	married	higher_education	3000-5000	NO	6to12	4	NO	NO	NO	YES
normal	2.74	27.4	6.1	2.56	5.62	1.02	MALE	29	married	senior_high_school	3000-5000	NO	6to12	5	NO	NO	NO	YES
normal	2.73	27.3	5.77	4.27	5.37	1.14	MALE	56	married	higher_education	3000-5000	NO	6to12	3	YES	YES	NO	YES
normal	2.73	29.8	6.79	4.17	4.99	1.2	MALE	37	married	higher_education	3000-5000	NO	6to12	4	YES	NO	NO	YES
normal	2.73	26.2	7.65	10.17	5.13	1.25	MALE	37	married	higher_education	3000-5000	NO	6to12	4	NO	NO	NO	YES
normal	2.73	27.4	5	3.79	4.8	0.8	MALE	30	married	higher_education	3000-5000	YES	6to12	2	NO	NO	NO	YES
normal	2.73	20.3	5.38	0.74	5.12	1.29	FEMALE	35	married	higher_education	1000-3000	NO	6to12	4	NO	NO	NO	NO
normal	2.72	27	5.41	1.02	6.22	1.4	MALE	59	married	higher_education	3000-5000	NO	6to12	3	NO	NO	NO	NO
normal	2.72	25.9	5.11	1.1	6.15	1	MALE	37	married	higher_education	3000-5000	NO	6to12	5	NO	NO	NO	NO
normal	2.72	22.9	5.89	2.7	5.5	1.29	MALE	42	married	higher_education	3000-5000	NO	6to12	4	NO	NO	NO	YES
normal	2.72	26.7	6.21	3.03	5.23	1.21	MALE	40	married	higher_education	3000-5000	NO	6to12	4	NO	NO	NO	YES
normal	2.72	23.4	5.93	1.31	5.38	1.25	FEMALE	36	married	higher_education	3000-5000	NO	6to12	4	NO	NO	NO	YES
normal	2.72	20.8	5.58	1.5	5.74	1.51	FEMALE	28	spinsterhood	higher_education	3000-5000	NO	6to12	4	NO	NO	NO	NO
normal	2.71	21.5	6.18	0.86	4.88	1.85	FEMALE	35	married	higher_education	3000-5000	NO	6to12	3	NO	NO	NO	YES
normal	2.71	24.3	5.63	1.48	5.69	1.12	MALE	65	married	junior_high_school	1000-3000	YES	6to12	3	NO	NO	NO	NO
normal	2.71	30.2	5.2	1.19	4.96	1.1	FEMALE	34	married	higher_education	3000-5000	NO	6to12	4	NO	YES	NO	NO
normal	2.71	23.6	5.27	1.97	5.3	1.16	MALE	26	married	higher_education	3000-5000	YES	6to12	4	NO	NO	NO	YES
normal	2.7	28.8	5.1	3.52	5.27	0.94	FEMALE	31	married	higher_education	3000-5000	NO	6to12	4	NO	NO	NO	YES
normal	2.69	31.8	6.6	15.39	15.79	1.18	FEMALE	44	married	higher_education	3000-5000	NO	6to12	3	NO	NO	YES	YES
normal	2.69	29.7	5.27	1.71	5.05	1.32	FEMALE	42	married	higher_education	1000-3000	NO	6to12	5	NO	YES	NO	YES
normal	2.69	20.1	5.06	1.29	4.46	1.07	FEMALE	37	married	higher_education	3000-5000	NO	6to12	4	NO	NO	NO	NO
normal	2.69	29.9	4.91	1.42	4.45	1.02	MALE	33	married	higher_education	3000-5000	NO	6to12	3	NO	YES	NO	NO
normal	2.69	17.3	5.26	0.89	5.04	1.23	FEMALE	38	married	higher_education	3000-5000	NO	6to12	4	NO	NO	NO	NO
normal	2.69	34	5.01	2.17	6.37	1.01	MALE	36	married	higher_education	3000-5000	YES	6to12	3	NO	YES	NO	YES
normal	2.69	28.5	5.28	2.54	5.49	0.99	MALE	38	married	senior_high_school	3000-5000	YES	6to12	3	YES	NO	NO	YES
normal	2.69	28.5	4.65	1.96	4.98	0.71	MALE	38	married	higher_education	3000-5000	YES	6to12	5	NO	NO	NO	YES
normal	2.69	23.5	4.71	7.69	5.68	0.95	FEMALE	37	married	higher_education	3000-5000	NO	6to12	5	NO	NO	NO	YES
normal	2.69	21.2	5.49	4.43	5.25	1.07	MALE	41	divorced	higher_education	3000-5000	NO	6to12	2	YES	NO	NO	YES
normal	2.69	26.3	5.07	1.58	4.72	1.09	FEMALE	41	married	senior_high_school	3000-5000	NO	6to12	4	NO	NO	NO	NO
normal	2.69	28	5.33	1.07	5.12	1.29	MALE	32	married	higher_education	3000-5000	NO	6to12	4	NO	NO	NO	NO
normal	2.68	24.8	6.9	1.9	5.65	1.27	MALE	38	married	higher_education	3000-5000	NO	6to12	3	NO	YES	NO	YES
normal	2.67	33.3	4.94	2.31	6.05	0.94	MALE	35	married	higher_education	3000-5000	NO	6to12	3	NO	NO	NO	YES
normal	2.67	26	5.28	1.36	4.93	1.11	MALE	33	married	higher_education	3000-5000	YES	6to12	3	NO	NO	NO	NO
normal	2.67	24	5.27	4.83	5.77	0.9	MALE	37	married	higher_education	3000-5000	YES	6to12	4	NO	NO	NO	YES
normal	2.67	27.7	5.71	2.29	5.43	1.44	MALE	29	married	higher_education	3000-5000	YES	6to12	3	YES	NO	NO	YES
normal	2.67	21.6	4.85	1.83	5.26	0.9	MALE	31	married	higher_education	3000-5000	NO	6to12	5	NO	NO	NO	YES
normal	2.66	24.6	5.87	1.87	4.96	1.06	MALE	36	married	higher_education	3000-5000	NO	6to12	4	NO	YES	NO	YES
normal	2.66	26.8	5.21	2.4	4.96	1	MALE	56	married	higher_education	3000-5000	Quitting	6to12	4	YES	YES	NO	YES
normal	2.66	28.3	4.92	1.42	5	0.96	MALE	36	married	higher_education	3000-5000	NO	6to12	3	NO	NO	NO	NO
normal	2.66	28.2	5.97	2.05	5.69	1.09	MALE	41	married	higher_education	3000-5000	YES	6to12	4	YES	NO	NO	YES
normal	2.66	24.4	4.9	0.97	5.17	0.96	MALE	37	married	higher_education	3000-5000	YES	6to12	4	NO	NO	NO	NO
normal	2.66	22.3	5.15	1.41	5.52	1.03	FEMALE	41	married	higher_education	3000-5000	NO	6to12	4	NO	NO	NO	NO
normal	2.65	23.8	5.13	0.78	5	1.28	FEMALE	34	married	higher_education	3000-5000	NO	6to12	5	NO	NO	NO	NO
normal	2.65	25	5.53	1.97	4.88	1.1	FEMALE	49	married	higher_education	3000-5000	NO	6to12	4	NO	NO	NO	YES
normal	2.65	21.5	5.31	2.9	6.06	0.86	MALE	52	married	junior_high_school	1000-3000	YES	6to12	2	NO	NO	NO	YES
normal	2.64	23.7	5.28	1.04	5.16	1.48	FEMALE	41	married	higher_education	3000-5000	NO	6to12	3	NO	NO	NO	NO
normal	2.64	25.2	5.55	1.21	4.84	1.19	MALE	36	married	higher_education	5000to10000	NO	6to12	4	NO	NO	NO	NO
normal	2.64	29.6	5.01	1.93	5.41	1.07	MALE	42	married	higher_education	3000-5000	YES	6to12	4	YES	YES	NO	YES
normal	2.64	21.4	4.82	1.04	6.01	1.02	MALE	42	married	senior_high_school	3000-5000	YES	6to12	4	NO	NO	NO	NO
normal	2.64	24.2	4.75	2.22	5.7	0.78	MALE	33	married	higher_education	3000-5000	YES	6to12	4	NO	NO	NO	YES
normal	2.64	28.9	5.04	2.07	5.39	0.99	FEMALE	40	married	higher_education	3000-5000	NO	6to12	3	NO	YES	NO	YES
normal	2.64	18.8	5.2	0.88	4.63	1.32	FEMALE	31	married	higher_education	3000-5000	YES	6to12	4	YES	NO	NO	NO
normal	2.64	34.6	4.98	2.48	5.58	0.94	MALE	32	married	higher_education	3000-5000	YES	6to12	3	NO	NO	NO	YES
normal	2.64	23	5.58	1.93	4.36	1.3	FEMALE	32	married	higher_education	3000-5000	NO	6to12	5	NO	NO	NO	YES
normal	2.63	30.5	4.93	1.83	4.82	0.82	MALE	33	married	higher_education	3000-5000	YES	6to12	2	NO	NO	NO	YES
normal	2.63	26.1	4.91	1.77	4.99	0.91	MALE	37	married	higher_education	3000-5000	NO	6to12	3	NO	NO	NO	YES
normal	2.63	27.8	5.16	2.18	4.63	0.9	MALE	35	married	higher_education	3000-5000	NO	6to12	3	NO	YES	NO	YES
normal	2.63	17.4	6.75	0.68	4.71	1.84	FEMALE	31	married	higher_education	3000-5000	NO	6to12	3	NO	NO	NO	YES
normal	2.63	26.5	5.53	3.94	6.02	1.3	MALE	29	married	senior_high_school	3000-5000	NO	6to12	4	NO	YES	NO	YES
normal	2.63	24.4	6.13	0.9	5.15	1.35	MALE	64	married	senior_high_school	3000-5000	Quitting	6to12	3	YES	YES	NO	YES
normal	2.62	28.2	4.81	1.46	5.22	0.9	MALE	43	married	higher_education	3000-5000	NO	6to12	4	NO	YES	NO	NO
normal	2.62	29.4	5.06	1.88	5.21	1.15	MALE	34	married	higher_education	3000-5000	YES	6to12	5	NO	NO	NO	YES
normal	2.62	25.2	5.05	3.47	5	1.06	FEMALE	35	married	higher_education	3000-5000	NO	6to12	5	NO	NO	NO	YES
normal	2.62	19.5	5.01	0.99	4.53	1.19	FEMALE	34	married	higher_education	3000-5000	NO	6to12	4	NO	NO	NO	NO
normal	2.62	21.6	4.52	2.28	4.85	0.97	FEMALE	33	married	higher_education	3000-5000	NO	6to12	3	NO	NO	NO	YES
normal	2.61	24.2	6.12	1.54	5.64	1.22	FEMALE	41	married	junior_high_school	3000-5000	NO	6to12	5	NO	NO	NO	YES
normal	2.61	24.1	5.42	1.42	6.14	1.01	MALE	56	married	senior_high_school	3000-5000	YES	6to12	5	NO	YES	NO	NO
normal	2.61	24.1	5.12	1.6	5.7	1.24	MALE	38	married	senior_high_school	3000-5000	YES	6to12	3	YES	NO	NO	NO
normal	2.61	28.1	5.27	1.71	5.5	0.93	FEMALE	38	married	higher_education	3000-5000	NO	6to12	4	NO	NO	NO	YES
normal	2.61	25.9	4.81	1.74	5.5	0.91	MALE	40	married	higher_education	3000-5000	YES	6to12	3	YES	NO	NO	YES
normal	2.61	29.2	5.67	3.15	5.31	1.25	MALE	38	married	higher_education	3000-5000	YES	6to12	4	YES	NO	NO	YES
normal	2.61	21.6	5.59	0.76	4.59	1.61	FEMALE	29	divorced	higher_education	3000-5000	NO	6to12	3	NO	NO	NO	NO
normal	2.61	22	5.36	2.14	4.89	1.23	FEMALE	37	married	senior_high_school	1000-3000	NO	6to12	4	NO	NO	NO	YES
normal	2.61	23.3	5.6	0.97	5.55	1.22	MALE	31	married	senior_high_school	3000-5000	NO	6to12	4	NO	NO	NO	NO
normal	2.61	23.8	5.38	0.86	4.54	1.37	FEMALE	33	married	higher_education	3000-5000	NO	6to12	4	NO	NO	NO	NO
normal	2.61	21.3	5.06	2.21	5.11	0.98	MALE	32	married	senior_high_school	3000-5000	YES	6to12	4	NO	NO	NO	YES
normal	2.6	24.5	4.67	2.17	5.43	0.86	MALE	39	married	higher_education	3000-5000	NO	6to12	3	NO	NO	NO	YES
normal	2.6	28.9	4.7	1.2	6.02	0.91	MALE	36	married	higher_education	3000-5000	YES	6to12	4	NO	YES	NO	NO
normal	2.6	25.4	5.79	0.79	4.93	1.75	FEMALE	40	married	higher_education	3000-5000	NO	6to12	4	NO	NO	NO	YES
normal	2.6	24.6	5.11	2.38	4.88	1.03	MALE	40	married	higher_education	3000-5000	NO	6to12	3	NO	YES	NO	YES
normal	2.6	23.9	4.85	2.41	4.96	0.86	MALE	35	married	senior_high_school	3000-5000	YES	6to12	4	YES	NO	NO	YES
normal	2.6	27.7	5.32	8.46	5.09	0.98	MALE	40	married	higher_education	3000-5000	YES	6to12	5	NO	YES	NO	YES
normal	2.6	26	4.89	1.18	5.47	0.94	MALE	36	married	higher_education	3000-5000	NO	6to12	4	NO	YES	NO	NO
normal	2.6	23.7	5.01	1.55	5.17	0.99	MALE	37	married	higher_education	3000-5000	NO	6to12	4	NO	NO	NO	NO
normal	2.6	31.2	7.45	6.14	6.59	1.37	MALE	39	married	higher_education	3000-5000	NO	6to12	3	YES	YES	NO	YES
normal	2.6	27.2	5.84	2.08	6.05	0.95	MALE	42	married	higher_education	3000-5000	NO	6to12	4	NO	YES	NO	YES
normal	2.6	23.1	5.23	1.19	4.3	1.1	MALE	31	spinsterhood	higher_education	3000-5000	NO	6to12	4	NO	NO	NO	NO
normal	2.59	20.1	5.05	1.3	5.23	1.22	FEMALE	41	married	higher_education	3000-5000	NO	6to12	4	NO	NO	NO	NO
normal	2.59	19.8	4.91	0.8	5.03	1	FEMALE	31	married	higher_education	3000-5000	NO	6to12	5	NO	NO	NO	NO
normal	2.58	33.6	5.17	4.1	4.83	0.97	MALE	38	married	senior_high_school	3000-5000	NO	6to12	4	YES	YES	NO	YES
normal	2.58	26.1	6.52	4.57	6.65	1.2	MALE	38	married	higher_education	3000-5000	YES	6to12	4	NO	NO	NO	YES
normal	2.58	24.2	6.44	1.21	4.69	1.55	MALE	30	married	higher_education	3000-5000	YES	6to12	3	YES	NO	NO	YES
normal	2.58	29	5.59	2.49	5.92	1.12	MALE	37	married	higher_education	3000-5000	NO	6to12	3	YES	YES	NO	YES
normal	2.58	22.8	4.7	1.95	5.9	0.88	MALE	37	married	senior_high_school	3000-5000	NO	6to12	4	NO	NO	NO	YES
normal	2.58	24.8	5.02	0.87	4.82	1.33	FEMALE	52	married	higher_education	3000-5000	NO	6to12	3	NO	NO	NO	NO
normal	2.57	21.9	6.18	1.65	4.66	1.13	FEMALE	36	married	senior_high_school	3000-5000	NO	6to12	4	NO	NO	NO	YES
normal	2.57	25.5	6.94	3.55	14.07	1.19	MALE	41	married	higher_education	3000-5000	YES	6to12	4	NO	YES	NO	YES
normal	2.57	24.5	4.98	1.53	5.12	1.16	FEMALE	31	married	higher_education	3000-5000	NO	6to12	4	NO	NO	NO	NO
normal	2.57	28.8	4.81	1.39	5.65	1.1	MALE	29	married	higher_education	3000-5000	NO	6to12	5	YES	NO	NO	NO
normal	2.57	22.4	5.19	1.08	4.75	1.25	FEMALE	32	married	higher_education	1000-3000	NO	6to12	5	NO	NO	NO	NO
normal	2.56	28.4	5.28	5.6	5.87	0.98	FEMALE	39	married	higher_education	3000-5000	NO	6to12	4	NO	NO	NO	YES
normal	2.56	22.2	5.34	2.22	4.99	1.08	MALE	32	married	higher_education	1000-3000	NO	6to12	2	NO	NO	NO	YES
normal	2.56	19.5	5.02	0.74	5.03	1.39	FEMALE	34	married	higher_education	3000-5000	NO	6to12	4	NO	NO	NO	NO
normal	2.56	32.5	4.59	3.3	5.24	0.84	MALE	32	married	higher_education	3000-5000	YES	6to12	4	NO	YES	NO	YES
normal	2.56	24	5.35	1.31	4.87	1.45	FEMALE	45	married	senior_high_school	3000-5000	NO	6to12	3	NO	NO	NO	NO
normal	2.56	26.8	4.95	1.65	5.98	1.06	MALE	51	married	junior_high_school	3000-5000	NO	6to12	3	NO	YES	NO	NO
normal	2.56	23.9	4.69	0.81	4.74	1.47	FEMALE	24	spinsterhood	higher_education	5000to10000	NO	6to12	3	NO	NO	NO	NO
normal	2.55	24.9	4.64	1.31	4.56	0.82	MALE	33	married	higher_education	3000-5000	NO	6to12	4	NO	NO	NO	NO
normal	2.55	26	5.97	1.08	5.69	1.52	MALE	43	married	higher_education	3000-5000	NO	6to12	4	YES	NO	NO	YES
normal	2.55	22.1	5.06	2.31	4.52	1.14	FEMALE	34	married	higher_education	3000-5000	NO	6to12	4	NO	NO	NO	YES
normal	2.55	30.2	4.91	2.58	10.88	1.05	FEMALE	33	married	junior_high_school	3000-5000	NO	6to12	5	NO	YES	NO	YES
normal	2.54	24.8	4.82	1.53	5.01	1.08	MALE	40	married	higher_education	3000-5000	NO	6to12	3	NO	NO	NO	NO
normal	2.54	37.1	5.24	1.25	4.74	1.05	MALE	39	married	higher_education	3000-5000	NO	6to12	3	NO	NO	NO	NO
normal	2.54	24.5	5.01	1.31	6.27	1.15	MALE	38	married	higher_education	5000to10000	NO	6to12	4	NO	YES	NO	NO
normal	2.54	28.8	4.66	1.06	5.67	0.99	FEMALE	73	married	primary_school	3000-5000	NO	6to12	1	NO	NO	NO	NO
normal	2.54	30.2	5.06	4.9	4.77	0.88	MALE	32	married	higher_education	3000-5000	YES	6to12	4	YES	YES	NO	YES
normal	2.53	23.7	4.73	1.77	4.73	0.89	MALE	34	married	higher_education	3000-5000	YES	6to12	4	YES	NO	NO	YES
normal	2.53	22.3	4.91	1.59	6.23	0.99	MALE	32	married	higher_education	3000-5000	NO	6to12	5	NO	NO	NO	NO
normal	2.53	23.4	6.92	14.77	12.87	1.23	MALE	37	married	higher_education	3000-5000	YES	6to12	4	NO	YES	NO	YES
normal	2.53	21.1	4.97	1.44	4.95	1.17	MALE	34	married	higher_education	3000-5000	NO	6to12	4	NO	NO	NO	NO
normal	2.53	23	4.95	2.34	5.07	0.99	MALE	33	married	senior_high_school	3000-5000	NO	6to12	4	NO	NO	NO	YES
normal	2.53	22.8	4.58	1.1	4.78	1.01	MALE	32	married	higher_education	3000-5000	NO	6to12	4	NO	NO	NO	NO
normal	2.53	21.7	5.37	2.69	5.42	1.02	MALE	31	married	higher_education	3000-5000	NO	6to12	4	NO	NO	NO	YES
normal	2.52	23.9	5.25	1.18	4.44	1.36	FEMALE	44	married	higher_education	3000-5000	NO	6to12	4	NO	NO	NO	NO
normal	2.52	37.8	5.88	1.75	6.6	1.06	MALE	31	married	higher_education	3000-5000	NO	6to12	4	YES	YES	NO	YES
normal	2.52	22.4	5.83	2.22	7.9	1.68	MALE	33	married	higher_education	3000-5000	YES	6to12	4	YES	YES	NO	YES
normal	2.52	25.2	5.07	2.34	4.75	1.08	MALE	29	married	higher_education	3000-5000	YES	6to12	3	YES	NO	NO	YES
normal	2.51	29.5	5	2.67	5	0.79	MALE	52	married	junior_high_school	3000-5000	NO	6to12	3	NO	YES	NO	YES
normal	2.51	28.1	5.78	1.3	4.63	1.35	MALE	32	married	higher_education	3000-5000	NO	6to12	4	YES	NO	NO	YES
normal	2.51	27.3	4.8	3.17	5.24	0.8	MALE	36	married	higher_education	3000-5000	NO	6to12	4	NO	YES	NO	YES
normal	2.51	27.4	5.2	1.36	5.3	0.92	FEMALE	30	married	junior_high_school	1000-3000	NO	6to12	5	NO	NO	NO	NO
normal	2.51	25.1	4.56	1.07	5.09	1.03	FEMALE	30	married	higher_education	3000-5000	NO	6to12	6	NO	NO	NO	NO
normal	2.51	20.3	6.93	0.98	5.34	1.67	FEMALE	34	married	higher_education	3000-5000	NO	6to12	3	NO	NO	NO	YES
normal	2.51	25.6	4.22	1.03	4.83	1.06	MALE	52	married	senior_high_school	3000-5000	NO	6to12	4	NO	YES	NO	NO
normal	2.5	26.9	7.09	1.77	5.31	1.45	MALE	37	married	higher_education	3000-5000	NO	6to12	4	YES	NO	NO	YES
normal	2.5	24.7	4.33	1.9	5.34	0.82	MALE	44	married	higher_education	3000-5000	YES	6to12	3	NO	NO	NO	YES
normal	2.5	26.5	5.98	2.21	5.57	1.22	MALE	69	married	higher_education	>10000	Quitting	6to12	4	NO	YES	NO	YES
normal	2.5	27.6	4.8	1.87	5	1.08	FEMALE	33	married	higher_education	3000-5000	NO	6to12	3	NO	NO	NO	YES
normal	2.5	24.2	4.84	1.37	5.27	0.91	MALE	39	married	senior_high_school	3000-5000	NO	6to12	4	NO	NO	NO	NO
normal	2.5	29.1	4.88	3.03	4.62	0.93	MALE	37	married	higher_education	3000-5000	NO	6to12	3	NO	NO	NO	YES
normal	2.5	24.4	4.81	0.69	4.9	1.14	FEMALE	29	spinsterhood	higher_education	3000-5000	NO	6to12	4	NO	NO	NO	NO
normal	2.49	32.4	4.77	2.89	5.63	0.81	MALE	42	married	higher_education	5000to10000	YES	6to12	3	YES	YES	YES	YES
normal	2.49	24.9	5.61	3.1	5.13	1.06	FEMALE	37	married	higher_education	3000-5000	NO	6to12	4	NO	NO	NO	YES
normal	2.49	22.9	4.93	1.4	5.66	1.02	MALE	54	married	higher_education	3000-5000	NO	6to12	4	NO	NO	NO	NO
normal	2.49	26.8	4.69	0.99	4.58	0.98	MALE	33	married	higher_education	3000-5000	NO	6to12	4	NO	NO	NO	NO
normal	2.49	22.9	4.98	1.25	4.83	1.25	FEMALE	33	married	higher_education	3000-5000	NO	6to12	4	NO	NO	NO	NO
normal	2.48	28	5.08	1.26	5.51	1.27	FEMALE	36	married	higher_education	3000-5000	NO	6to12	4	NO	YES	NO	NO
normal	2.48	25.3	4.63	2.22	5.29	0.8	MALE	33	married	higher_education	3000-5000	YES	6to12	4	NO	NO	NO	YES
normal	2.48	23.4	5.74	3.29	9.67	0.89	MALE	46	married	higher_education	3000-5000	YES	6to12	2	YES	NO	YES	YES
normal	2.48	26.5	5.25	0.7	4.78	1.56	FEMALE	34	married	higher_education	3000-5000	NO	6to12	4	NO	NO	NO	NO
normal	2.48	20.1	5.71	0.7	6.16	1.64	FEMALE	56	divorced	senior_high_school	3000-5000	NO	6to12	4	NO	YES	YES	YES
normal	2.48	24.8	5.81	8.92	5.62	1.29	MALE	43	married	junior_high_school	3000-5000	YES	6to12	2	NO	YES	NO	YES
normal	2.47	21.6	4.98	1.46	5.2	1.15	MALE	39	married	higher_education	1000-3000	YES	6to12	3	NO	NO	NO	NO
normal	2.47	25.9	5.65	2.54	5.74	1.02	MALE	38	married	higher_education	3000-5000	NO	6to12	3	YES	NO	NO	YES
normal	2.47	26.6	6	2.05	11.64	1.1	MALE	41	married	higher_education	3000-5000	YES	6to12	2	NO	NO	NO	YES
normal	2.47	22.7	6.02	3.36	5.61	1.27	FEMALE	30	married	higher_education	3000-5000	NO	6to12	4	NO	NO	NO	YES
normal	2.46	26.5	6.5	0.79	5.45	1.92	FEMALE	43	married	senior_high_school	3000-5000	NO	6to12	3	NO	NO	NO	YES
normal	2.46	23.7	4.97	7.66	5.28	0.93	FEMALE	44	married	higher_education	1000-3000	NO	6to12	3	NO	YES	NO	YES
normal	2.46	25.9	6.03	4.8	5.44	1.07	MALE	35	divorced	higher_education	3000-5000	NO	6to12	3	YES	YES	NO	YES
normal	2.46	26.9	4.82	0.73	5.15	1.02	MALE	32	married	higher_education	3000-5000	YES	6to12	3	NO	NO	NO	NO
normal	2.46	25.9	5.15	0.97	5.16	1.38	FEMALE	34	married	senior_high_school	3000-5000	NO	6to12	4	NO	NO	NO	NO
normal	2.46	26.4	5.17	1.96	5.99	0.9	FEMALE	41	married	higher_education	3000-5000	NO	6to12	5	NO	YES	NO	YES
normal	2.46	22	6.05	3.05	5.02	1.01	FEMALE	44	married	junior_high_school	3000-5000	NO	6to12	5	NO	NO	NO	YES
normal	2.46	33.8	5.18	0.88	5.52	1.82	FEMALE	32	married	higher_education	3000-5000	NO	6to12	4	NO	NO	NO	NO
normal	2.46	33.8	5.18	0.88	5.52	1.82	FEMALE	32	married	higher_education	3000-5000	NO	6to12	4	NO	NO	NO	NO
normal	2.46	24.7	5.09	0.95	5.99	1.34	MALE	35	married	higher_education	3000-5000	NO	6to12	5	NO	NO	NO	NO
normal	2.45	24.7	4.31	0.56	4.91	0.92	FEMALE	41	married	higher_education	3000-5000	NO	6to12	4	NO	NO	NO	NO
normal	2.45	25.8	4.51	2.22	4.98	0.88	MALE	35	married	higher_education	3000-5000	NO	6to12	4	NO	NO	NO	YES
normal	2.45	21.2	4.92	1.34	4.41	1.13	FEMALE	34	married	higher_education	3000-5000	NO	6to12	5	NO	NO	NO	NO
normal	2.45	21.7	4.99	1.3	4.7	1.23	FEMALE	41	married	higher_education	3000-5000	NO	6to12	3	NO	NO	NO	NO
normal	2.45	24.6	4.57	1.24	5.09	1.08	FEMALE	33	married	junior_high_school	3000-5000	NO	6to12	3	NO	NO	NO	NO
normal	2.44	31.6	4.83	3.6	5.36	0.87	MALE	34	married	higher_education	3000-5000	YES	6to12	5	NO	NO	NO	YES
normal	2.44	22.5	4.4	1.18	4.99	1.01	FEMALE	37	married	higher_education	3000-5000	NO	6to12	4	NO	NO	NO	NO
normal	2.44	22.3	5.2	2.02	4.69	1.4	MALE	42	married	higher_education	3000-5000	NO	6to12	4	NO	NO	NO	YES
normal	2.44	29.3	4.87	2.74	4.46	0.95	MALE	33	married	higher_education	3000-5000	YES	6to12	5	NO	NO	NO	YES
normal	2.44	40.7	4.68	3.04	3.97	0.85	MALE	34	married	higher_education	3000-5000	NO	6to12	3	NO	NO	NO	YES
normal	2.44	23.1	5.21	0.88	7.75	1.3	MALE	57	married	senior_high_school	3000-5000	NO	6to12	3	NO	NO	NO	NO
normal	2.44	25.3	4.91	1.58	4.68	1.34	FEMALE	37	married	higher_education	3000-5000	NO	6to12	5	NO	NO	NO	NO
normal	2.44	26.1	5.31	1.93	5.57	0.92	MALE	35	married	higher_education	3000-5000	YES	6to12	3	YES	NO	NO	YES
normal	2.43	30.6	5.9	5.72	8.18	1.13	MALE	43	married	higher_education	3000-5000	YES	6to12	4	YES	YES	NO	YES
normal	2.43	17.5	5.06	1.41	4.91	1.38	FEMALE	35	married	higher_education	3000-5000	NO	6to12	2	NO	NO	NO	NO
normal	2.43	21.7	4.95	1.31	5.07	1.28	MALE	38	married	higher_education	3000-5000	NO	6to12	4	YES	NO	NO	NO
normal	2.43	25.2	4.61	2.54	5.26	0.87	MALE	31	married	higher_education	3000-5000	NO	6to12	4	NO	YES	NO	YES
normal	2.43	25.8	4.94	1.17	5.5	1.21	MALE	25	spinsterhood	higher_education	3000-5000	NO	6to12	4	NO	NO	NO	NO
normal	2.42	20.1	4.95	1.53	5.24	1.28	FEMALE	38	married	higher_education	3000-5000	NO	6to12	4	NO	NO	NO	NO
normal	2.42	25.3	4.74	2.52	5.02	1.01	FEMALE	52	married	senior_high_school	3000-5000	NO	6to12	5	NO	NO	NO	YES
normal	2.42	27.9	4.45	0.97	5.46	0.91	MALE	36	married	higher_education	3000-5000	NO	6to12	3	NO	NO	NO	NO
[truncated: 2,553 more rows]

## Sheet: rawdata2
BMD	LDL	BMI	TC	TG	FBG	HDL	SEX	AGE	MARRIAGE	EDUCATION	INCOME	SMOKE	SALT	SLEEP	DRINK	HPT	DBT	HLP
1	3.53	22.1	5.87	1.23	5.08	1.34	2	49	2	4	3	0	1	3	0	0	0	1
1	3.46	25.2	6.37	0.94	6.68	1.12	1	56	2	3	3	1	1	4	1	1	1	1
1	3.31	23	5.48	2.64	6.32	0.96	1	62	2	4	3	0	1	4	0	0	0	1
1	3.28	24	6.39	1.68	6.52	1.47	2	59	2	5	3	0	2	3	0	0	0	1
1	3.22	25.8	6.3	5.14	5.19	1.21	1	47	2	5	3	0	1	4	0	0	0	1
1	3.21	24.8	6.57	1.05	4.94	1.2	1	48	2	5	3	1	3	4	0	0	0	1
1	3.07	26.1	5.8	3.73	5.23	1.08	1	46	2	3	3	1	2	4	0	1	0	1
1	2.98	30.6	5.96	1.95	5.29	1.05	1	46	2	5	3	0	2	4	0	1	0	1
1	2.96	26.1	6.23	2.99	9.83	0.97	2	58	2	5	3	0	1	3	0	1	1	1
1	2.95	28.2	5.76	1.75	4.99	1.07	1	66	2	3	3	0	2	3	0	1	0	1
1	2.95	28.2	5.76	1.75	4.99	1.07	1	66	2	3	3	0	2	3	0	1	0	1
1	2.86	25.7	5.47	0.98	5.39	1.22	1	46	2	4	3	1	2	4	0	0	0	0
1	2.77	23.3	5.54	1.39	5	1.44	2	55	2	4	3	0	2	1	0	0	0	0
1	2.71	21.1	5.44	0.71	5.91	1.58	2	47	2	3	3	0	1	4	0	0	0	0
1	2.71	21	6.11	0.98	4.39	1.26	2	47	2	5	3	0	2	4	0	0	0	1
1	2.58	24.8	5.05	1.04	5.21	1.07	2	49	2	5	3	0	2	3	0	0	0	0
1	2.54	26	5.87	2.21	5.78	1.06	1	65	2	4	3	0	1	3	0	1	1	1
1	2.48	27.8	5.67	0.9	7.56	1.23	2	54	2	4	3	0	2	2	0	0	0	1
1	2.45	23.2	6.09	2	5.21	1.25	1	49	2	5	2	0	1	4	1	0	0	1
1	2.44	27.5	4.99	1.39	5.34	1.23	1	70	2	3	2	0	1	5	1	1	0	0
1	2.41	23.6	4.86	1.66	5.34	1.07	2	52	2	3	3	0	1	2	0	1	0	0
1	2.41	28.9	4.94	4.61	4.88	0.97	1	48	2	4	3	1	2	4	1	1	0	1
1	2.38	25	4.55	1.95	6.03	0.97	1	65	2	3	3	0	1	3	0	0	0	1
1	2.38	22.9	4.97	1.15	6.02	1.17	1	63	2	5	3	0	1	3	0	0	1	0
1	2.35	24.9	5.23	1.27	5.21	1.06	1	50	2	5	3	0	2	3	0	1	0	0
1	2.35	24.3	5.86	1.73	5.37	1.03	1	70	2	3	2	1	3	4	0	0	0	1
1	2.34	23.3	4.84	0.96	5.16	1.08	2	47	2	4	2	0	2	3	0	0	0	0
1	2.31	30.3	5.63	1.18	5.06	1.08	1	56	2	5	3	0	3	3	0	1	0	0
1	2.28	25.3	4.73	0.92	5.57	1.21	2	57	2	4	3	0	1	2	0	0	0	0
1	2.23	26.8	5.26	2.17	10.03	1	1	55	2	5	3	0	3	5	0	1	1	1
1	2.17	30.7	5.29	3.55	5.61	1.1	1	57	2	4	3	1	1	4	1	1	0	1
1	2.15	27.2	4.45	1.96	5.19	1.26	2	51	2	4	2	0	1	4	0	0	0	1
1	2.14	24.5	4.5	2.45	5.3	1.01	1	55	2	5	3	0	2	5	0	1	0	1
1	2.14	23.6	5.75	1.05	4.72	1.47	2	47	2	5	3	0	2	3	0	1	0	1
1	2.12	27.7	4.85	2.53	6	0.88	1	46	2	5	3	2	3	5	0	0	0	1
1	2.08	26.4	4.39	2.15	5.33	1.11	1	51	2	5	3	0	3	4	0	0	0	1
1	2.08	29.1	4.59	1.46	8.47	1.07	1	47	2	5	3	0	1	3	1	1	1	0
1	1.96	25.9	4.15	1.17	9.27	1.07	1	67	2	4	3	0	2	2	0	1	1	0
1	1.82	24.8	4.02	1.03	5.5	1.18	1	52	2	4	3	1	3	3	0	1	0	0
1	1.82	29.9	4.15	1.35	7	1.16	2	71	2	3	3	0	1	2	0	0	1	1
1	1.77	27.7	5.29	3.73	5.36	1	1	51	2	5	3	0	2	4	0	1	0	1
1	1.77	27.6	4.5	0.88	4.74	1.34	1	71	2	2	3	2	3	2	0	1	0	0
1	1.77	19.6	4.24	0.61	5.34	1.43	1	66	2	4	3	0	1	2	0	0	1	0
1	1.73	20.3	5.01	0.58	4.8	1.54	2	49	2	5	3	0	2	4	0	0	0	0
1	1.73	24.2	5.07	1.02	6.79	1.17	2	48	2	3	3	0	3	4	0	0	0	0
1	1.71	23.9	4.11	1.33	4.91	0.93	2	41	2	5	3	0	3	4	0	0	0	0
1	1.68	27.6	4.77	2.37	4.83	1.14	1	48	2	5	3	0	2	4	0	1	0	1
1	1.55	19.1	4.5	0.9	4.97	1.9	2	49	2	5	3	0	2	4	0	0	0	0
1	1.53	27.2	4.39	1.05	5.27	1.55	1	72	2	5	3	0	1	3	0	0	0	0
1	1.5	32.5	5.14	2.27	5.92	1.06	1	46	2	5	3	1	2	2	1	0	0	1
1	1.48	23.8	3.44	0.81	9.54	1.05	1	56	2	5	3	0	1	4	1	1	1	1
1	1.42	24.6	4.66	1.13	4.66	1.31	2	45	2	4	3	0	2	5	0	0	0	0
1	1.28	22.2	4.65	2.33	5.47	1.18	1	52	2	4	3	0	2	5	1	1	0	1
1	1.27	28.2	4.48	2.75	5.5	1	2	47	2	3	3	0	2	4	0	1	0	1
1	1.26	27.3	4.08	3.19	6.32	0.91	1	49	2	5	3	1	3	2	1	1	1	1
1	1.08	26.5	4.87	1.46	7.12	1.18	2	50	2	4	3	0	2	4	0	0	0	0
1	1	18.4	4.43	0.64	4.06	1.62	2	52	2	5	3	0	1	4	0	0	0	0
1	0.75	24.6	4.42	0.86	5.05	1.55	1	51	2	4	3	0	2	4	0	1	0	0
1	0.62	30.8	3.22	2.27	5.8	0.85	2	46	2	5	3	0	1	4	0	0	0	1
0.9	5.77	25	9.13	0.95	5.23	1.12	2	51	2	4	3	0	1	3	0	0	0	1
0.9	4.39	25.9	7.39	2.01	4.53	1.41	1	46	2	5	3	1	3	4	1	0	0	1
0.9	3.55	25.6	6.16	1.17	5.06	1.18	1	52	2	5	3	1	2	4	0	0	0	1
0.9	3.37	25	7.5	2.86	4.95	1.34	1	46	2	5	3	1	3	4	1	0	0	1
0.9	3.37	27.1	5.98	1.51	5.45	1.39	1	49	2	5	3	0	2	5	1	1	0	1
0.9	3.35	24.8	6.48	1.67	5.39	1.34	2	53	2	4	3	0	2	4	0	0	0	1
0.9	3.13	28	5.83	1.6	5.81	1.34	2	60	2	3	3	0	2	2	0	1	0	1
0.9	2.99	25.5	5.55	3.68	7.42	1.01	1	69	2	3	3	0	2	4	0	1	1	1
0.9	2.96	23.8	5.97	1.57	5.25	1.16	1	56	2	4	3	1	1	4	0	0	0	1
0.9	2.82	25.1	5.69	1.08	6.06	1.11	1	64	2	3	3	1	2	4	1	1	0	0
0.9	2.72	25.7	6.27	2.24	5.32	1.23	1	47	2	5	4	0	2	4	0	1	0	1
0.9	2.64	34	5.03	1.89	10.17	1.14	2	51	3	4	3	0	1	3	0	1	1	1
0.9	2.62	22.8	4.97	1.65	6.74	1.1	1	65	2	3	3	0	3	3	0	1	1	0
0.9	2.6	23.6	5.25	2.63	5.47	0.89	1	50	2	5	3	0	2	4	0	1	0	1
0.9	2.6	26.2	5.11	1.87	6.57	1.28	1	62	2	5	3	0	2	3	0	0	0	1
0.9	2.59	22.1	5.2	1.15	5	1.41	2	52	2	3	2	0	2	3	0	0	0	0
0.9	2.56	26.6	5.35	3.53	5.45	1.03	2	66	2	4	3	0	3	4	0	1	0	1
0.9	2.56	22.6	5.96	2.1	4.64	1.52	1	64	2	5	3	0	1	4	0	1	0	1
0.9	2.51	20.1	4.97	1.81	4.58	1.11	2	51	2	5	3	0	2	3	0	0	0	1
0.9	2.47	32.3	4.62	2.33	8.84	1.24	2	45	2	5	3	0	2	4	0	1	0	1
0.9	2.45	27.7	6.95	3.29	5.85	1.35	1	57	2	4	3	1	3	3	0	1	0	1
0.9	2.44	20.5	5.06	1.92	4.57	1.27	2	49	2	5	3	0	1	2	0	0	0	1
0.9	2.4	23.3	4.88	1.44	5.36	0.96	2	46	2	5	3	0	2	2	0	0	0	0
0.9	2.36	23.1	5.27	1.15	6.15	1.25	2	54	2	5	4	0	2	3	0	0	0	0
0.9	2.31	24	5.68	0.72	6.23	1.39	1	58	2	4	4	0	1	4	1	1	0	0
0.9	2.29	24	4.34	2.25	5.23	0.91	1	47	2	5	3	0	1	4	0	1	0	1
0.9	2.28	19.2	4.47	1.16	4.76	0.9	2	48	2	3	3	0	1	4	0	0	0	0
0.9	2.28	27	4.46	0.7	4.93	0.98	1	60	2	5	3	0	1	3	1	0	0	0
0.9	2.26	24.9	5.73	1.45	8.87	1.15	1	55	2	4	3	0	2	4	1	1	0	1
0.9	2.24	23.5	4.68	2.11	4.81	1.15	2	47	2	4	5	0	1	4	0	0	0	1
0.9	2.22	22.7	4.77	1.04	5.46	0.98	2	46	2	5	3	0	1	4	0	0	0	0
0.9	2.22	27.3	4.41	3.37	6.34	0.82	1	65	2	3	3	1	2	4	1	1	1	1
0.9	2.16	24.4	4.51	1.44	4.68	1.15	1	52	2	5	3	2	2	4	0	1	0	0
0.9	2.08	22.5	4.1	1.76	5.61	0.89	1	50	2	5	3	0	2	4	0	1	0	1
0.9	2.06	22	4.79	3.04	7.28	1.09	2	55	2	5	3	0	1	3	0	0	0	1
0.9	2.06	20.6	4.42	0.65	4.88	1.38	2	46	2	5	3	0	2	2	0	1	0	0
0.9	2.06	24.3	5.13	0.66	4.92	1.4	2	54	2	4	3	0	3	3	0	0	0	0
0.9	2.05	25.3	4.29	0.73	4.92	1.22	1	63	2	4	3	0	1	5	0	1	0	0
0.9	2.03	21.6	4.44	1.08	5.53	1.07	1	55	2	3	3	1	3	4	1	1	0	0
0.9	2.02	28.9	4.19	1.25	7.04	1.02	1	51	2	1	3	1	1	4	1	1	0	0
0.9	2.01	27.1	4.19	1.29	5.42	1.18	2	51	2	5	3	0	3	4	0	1	0	0
0.9	1.95	21.7	4.01	1.11	5.93	0.98	1	46	2	5	3	1	1	3	1	0	0	0
0.9	1.94	22.6	4.48	3.6	5.17	1.01	2	48	2	4	3	0	2	5	0	0	0	1
0.9	1.94	24	5.01	1.07	6.29	1.28	1	74	2	3	2	0	1	3	0	1	0	0
0.9	1.84	31.3	4.62	2.4	5.72	0.9	1	55	2	5	4	1	2	4	0	1	0	1
0.9	1.83	26.6	5.65	1.53	6	1.18	1	49	2	4	3	1	3	4	1	0	0	0
0.9	1.83	21	6.42	1.38	4.53	1.93	2	47	2	5	3	0	2	4	0	0	0	1
0.9	1.76	32.7	4.16	0.85	6.03	1.1	2	36	2	5	3	0	2	5	0	1	0	0
0.9	1.76	24.9	4.75	1.43	5.35	1.05	1	62	2	4	3	0	2	4	0	0	0	0
0.9	1.72	25.1	3.77	2.35	5.27	1.01	1	77	2	5	2	0	1	4	0	1	0	1
0.9	1.69	22	4	1.88	5.08	0.99	2	51	2	5	3	0	1	2	0	0	0	1
0.9	1.62	23.7	4.98	2.53	6.54	1.21	1	54	2	5	3	2	3	2	0	0	0	1
0.9	1.58	27.3	4.95	1.37	5.06	1.01	2	55	2	3	3	0	1	2	0	0	0	0
0.9	1.51	25.2	4.67	1.67	4.91	1.23	1	45	2	5	3	1	3	4	1	0	0	0
0.9	1.49	26.1	4.18	2.65	5.46	0.94	2	60	2	3	2	0	1	4	0	1	0	1
0.9	1.28	24.6	5.33	0.88	5.5	1.25	1	66	2	4	3	0	2	3	0	0	0	0
0.9	1.24	28.6	4.28	1.92	7.67	1.16	1	58	2	5	2	1	1	3	0	1	0	1
0.9	1.22	27.3	5.09	1.69	5.8	1.15	1	47	2	5	3	1	1	5	0	1	0	0
0.9	1.2	23.3	3.45	1.13	5.53	0.89	1	63	2	4	3	2	1	4	0	1	0	0
0.9	1.01	25.7	3.92	2.63	4.56	0.93	1	48	2	5	3	0	3	3	0	1	0	1
0.9	0.96	23.5	4.62	2.18	5.34	1.01	1	75	2	4	3	2	3	3	0	1	0	1
0.8	4.22	19.2	7.44	1.07	4.89	1.29	2	50	2	4	3	0	1	3	0	0	0	1
0.8	3.72	19	6.06	1.64	5.2	1.27	2	56	2	5	4	0	2	3	0	1	0	1
0.8	3.69	28.5	5.77	1.49	5.1	1.19	2	64	2	3	2	0	1	5	0	0	0	1
0.8	3.53	28.9	5.73	3.67	7.36	1.03	1	65	2	3	3	1	3	4	0	1	0	1
0.8	3.35	21.3	6.53	1.5	4.93	1.2	2	51	2	4	3	0	2	4	0	0	0	1
0.8	3.3	26.3	6.03	2.02	5.4	1.23	2	53	2	4	3	0	3	3	0	0	0	1
0.8	3.13	30.4	6.09	3.69	6.05	1.05	2	65	2	3	3	0	1	3	0	1	0	1
0.8	3.11	23.7	6.13	1.79	5.02	1.26	2	54	2	5	3	0	2	4	0	0	0	1
0.8	2.94	25.7	5.17	2.36	6.22	1.11	1	57	2	5	3	0	2	4	1	0	1	1
0.8	2.79	26.3	5.28	2.39	5.41	0.98	1	64	2	3	5	0	2	4	0	1	0	1
0.8	2.78	32.1	5.42	2.34	8.54	1.08	1	57	2	5	3	1	3	2	0	1	0	1
0.8	2.68	22.7	5.26	2.1	5.23	1.07	1	58	2	4	3	1	2	4	1	0	0	1
0.8	2.67	23.8	5.09	0.98	5.18	1.11	1	71	2	4	3	1	3	3	0	0	0	0
0.8	2.65	27.5	5.23	1.71	6.02	1.1	1	61	2	5	3	0	2	1	0	0	0	1
0.8	2.51	26.7	6.15	14.8	4.46	1.06	1	42	2	4	3	0	3	4	0	1	0	1
0.8	2.47	28.8	5.23	2.39	5.62	1.09	2	50	2	5	4	0	2	4	0	1	0	1
0.8	2.45	26.7	5.24	2.47	5.81	1.23	2	62	2	3	3	0	2	3	0	1	0	1
0.8	2.34	23.2	4.84	1.21	5.91	1.15	1	74	2	5	3	2	2	2	0	1	0	0
0.8	2.33	28.7	5.41	1.86	5.98	1.08	2	77	2	1	2	0	2	4	0	0	0	1
0.8	2.21	28.9	4.08	1.44	4.87	0.81	1	66	2	4	3	1	2	3	0	1	0	0
0.8	2.16	25.2	5.3	1.62	5.63	1.12	2	48	2	5	4	0	2	4	0	0	0	0
0.8	2.15	21.6	4.94	1.13	4.94	1.48	2	47	2	4	3	0	1	3	0	0	0	0
0.8	2.11	20.8	5.35	0.6	5.65	1.75	1	68	2	2	1	0	2	3	0	0	0	0
0.8	2.06	27.6	5.1	1.2	5.1	1.34	2	65	2	2	2	0	1	2	0	1	0	1
0.8	2.05	30.2	5.64	1.28	5.9	1.03	2	52	2	3	2	0	2	2	0	0	0	0
0.8	2.05	28.6	4.93	2.5	5.26	1.16	1	52	2	5	3	1	2	3	1	1	0	1
0.8	2.05	27.3	5.04	1.75	5	1.09	2	64	2	5	3	0	3	3	0	0	0	1
0.8	1.93	22.4	4.71	0.45	5.86	1.43	1	69	2	2	3	0	2	2	0	1	0	0
0.8	1.91	25.9	5.62	1.69	5.91	1.56	1	65	2	5	3	0	2	4	0	1	0	0
0.8	1.9	25.2	4.43	0.82	4.99	1.36	2	64	2	3	3	0	3	3	0	0	0	0
0.8	1.82	25.2	5.25	1.66	5.26	1.13	2	52	2	5	3	0	1	4	0	0	0	0
0.8	1.78	23.7	4.1	1.4	4.67	1.17	1	49	2	5	3	1	2	4	0	0	0	0
0.8	1.78	27	3.71	1.2	5.96	0.84	1	65	2	4	2	1	3	5	0	0	0	0
0.8	1.75	29.4	4.41	2.85	5.23	0.86	1	47	2	5	3	1	1	4	0	1	0	1
0.8	1.71	26.7	4.85	5.13	5.6	1.11	1	51	2	4	3	0	2	4	0	0	0	1
0.8	1.7	19.5	4.18	0.63	5.22	1.53	2	47	2	4	3	0	2	3	0	0	0	0
0.8	1.63	25.8	4.22	5.97	5.56	0.81	1	66	2	4	3	1	2	4	1	0	0	1
0.8	1.63	27.4	4.57	6.27	9.95	0.89	1	70	2	3	3	2	1	4	0	0	1	1
0.8	1.61	29.1	5.03	6.03	6.19	1.04	1	53	2	5	3	0	2	3	1	0	0	1
0.8	1.59	31	4.02	1.33	5.08	0.96	1	52	2	4	3	1	2	2	0	1	0	0
0.8	1.57	27.2	5.48	1.55	5.95	1.19	1	51	2	5	3	0	2	5	0	1	0	0
0.8	1.56	23.6	3.88	1.01	5.27	0.99	1	69	2	2	3	0	2	3	0	0	0	0
0.8	1.53	22.4	5.29	1.08	5.32	1.57	2	52	2	4	3	0	2	3	0	0	0	0
0.8	1.49	21.8	4.81	2.06	5.25	1.44	2	52	2	5	3	0	1	5	0	0	0	1
0.8	1.47	24.6	4.16	1.22	8.77	0.87	1	65	2	2	2	1	2	2	1	1	1	0
0.8	1.4	20.7	5.58	1.78	5.01	1.54	2	48	2	5	3	0	1	4	0	0	0	1
0.8	1.29	23.4	3.33	1.44	6.79	1.02	1	69	2	3	3	0	2	4	0	1	0	0
0.8	1.27	27	4.76	1.29	4.85	1.43	2	47	2	5	3	0	1	5	0	0	0	0
0.8	1.24	27.5	4.71	1.75	4.62	0.97	1	50	2	4	3	0	2	3	0	0	0	1
0.8	0.91	22.5	5	0.68	5.31	1.72	1	54	2	3	2	1	2	5	0	0	0	0
0.8	0.68	30.9	4.09	3.31	6.22	1.05	2	48	2	5	3	0	2	3	0	1	0	1
0.7	5.26	22	9.1	1.18	5.25	1.64	2	47	2	5	3	0	1	4	0	0	0	1
0.7	3.88	25.4	8.01	1.87	6.66	1.5	2	62	2	1	3	0	2	2	0	1	0	1
0.7	3.83	26.4	6.79	3.9	5.78	1.06	1	57	2	4	3	2	1	4	0	1	0	1
0.7	3.72	28.9	6.3	2.03	5.3	1.22	1	50	2	5	3	0	1	4	0	1	0	1
0.7	3.71	27.6	6.65	2.84	5.34	1.31	1	54	2	5	3	0	1	4	0	1	0	1
0.7	3.52	25.5	7.41	2.25	7.37	1.32	1	63	2	5	3	0	1	4	0	0	0	1
0.7	3.42	21.6	6.12	1.46	5.86	1.25	1	53	2	5	3	0	2	3	1	0	0	1
0.7	3.29	23	5.63	1.71	8.74	0.91	1	59	2	5	3	1	2	5	0	1	1	1
0.7	3.24	21	6.66	1.62	5.44	1.56	2	47	2	5	3	0	2	2	0	0	0	1
0.7	3.17	22.2	5.99	1.32	5.79	1.66	2	51	4	3	2	0	1	4	0	1	0	1
0.7	3.13	25.4	5.95	3.5	5.77	1.05	2	66	2	3	2	0	2	5	0	0	0	1
0.7	3.08	31.6	5.85	1.09	4.9	1.44	2	54	2	5	3	0	2	4	0	0	0	1
0.7	2.93	24.4	5.69	1.12	5.34	1.41	2	53	2	5	3	0	1	4	0	1	0	0
0.7	2.88	26.2	5.5	3.32	5.75	0.97	1	55	2	4	3	1	2	3	0	1	0	1
0.7	2.85	27.8	6.54	5.84	5.16	1.21	2	65	2	3	2	0	1	3	0	1	0	1
0.7	2.81	25.7	5.3	1.3	4.73	1.04	1	75	2	2	3	2	2	3	0	1	0	0
0.7	2.78	27.5	4.95	2.61	5.31	0.84	1	49	2	5	3	0	1	#NULL!	0	0	0	1
0.7	2.72	29.4	5.33	2.8	8.95	1.08	1	55	2	4	3	1	1	4	0	1	1	1
0.7	2.71	27.7	5.42	0.91	5.21	1.47	2	65	2	3	2	0	2	2	0	1	0	0
0.7	2.57	26.3	4.86	1.74	6.83	0.94	1	70	2	3	3	2	3	4	0	0	0	1
0.7	2.56	22.7	5.61	1.2	5.49	1.29	2	53	2	5	3	0	2	4	0	0	0	0
0.7	2.55	25.6	4.81	1.67	5.86	0.93	1	60	2	4	3	0	2	5	0	0	0	0
0.7	2.54	23.7	6.6	2.94	5.52	1.3	1	51	2	5	3	1	2	4	0	1	0	1
0.7	2.49	22.3	6.54	1.3	5.57	1.57	2	51	2	4	3	0	1	5	0	1	0	1
0.7	2.48	24.9	5.45	0.77	4.98	1.33	1	55	2	3	3	0	3	3	0	1	0	0
0.7	2.45	21.3	5.81	0.7	6.95	2.05	2	67	2	2	3	0	1	3	0	1	0	1
0.7	2.39	21.7	4.89	1	5.13	1.37	2	63	2	5	3	0	1	2	0	1	0	0
0.7	2.36	24.1	5.17	1.72	5.44	1.06	1	69	2	4	3	0	2	3	0	1	0	1
0.7	2.35	23.9	5.34	1.15	5	1.63	2	50	2	5	3	0	2	4	0	0	0	0
0.7	2.29	25.9	5.12	1.81	4.65	1.33	2	55	2	3	3	0	3	5	0	1	0	1
0.7	2.28	21.6	4.95	1.1	4.82	1.35	2	49	2	5	3	0	1	2	0	0	0	0
0.7	2.25	26.5	4.55	2.48	8.12	0.91	1	55	2	4	3	2	2	4	1	1	1	1
0.7	2.23	23.7	4.55	1.04	8.18	1.17	1	63	2	5	4	1	1	4	1	0	1	0
0.7	2.19	20.2	6	1.33	4.67	1.33	2	49	2	5	3	0	1	4	0	0	0	1
0.7	2.18	29	4.35	2.49	6.15	1.03	2	52	2	3	2	0	2	3	0	1	0	1
0.7	2.13	28.4	5.34	2.13	5.39	1.07	1	67	2	3	2	0	2	3	0	1	0	1
0.7	2.1	27	5.12	1.43	5.59	1.01	1	63	2	3	3	1	2	4	0	0	0	0
0.7	2.09	23.4	4.62	3.49	4.98	0.95	2	49	2	3	2	0	2	4	0	0	0	1
0.7	2.06	26.7	4.69	3.6	8.05	0.96	1	51	2	5	2	1	3	2	1	0	0	1
0.7	2.04	23	4.85	0.96	4.72	1.55	1	63	2	2	3	1	3	3	0	0	1	0
0.7	2.04	24.9	5.09	0.94	5.2	1.24	1	66	2	3	3	0	2	4	0	0	0	0
0.7	1.99	29.2	4.42	1.08	4.91	1.24	2	51	2	5	3	0	1	4	0	0	0	0
0.7	1.97	22.7	6.34	2.6	4.8	1.26	2	50	2	5	3	0	1	4	0	0	0	1
0.7	1.97	27.4	4.21	2.11	5.25	1.07	1	67	2	4	3	1	3	4	0	1	0	1
0.7	1.93	22.7	4.29	1.29	5.86	1.3	1	56	2	3	3	1	3	4	1	1	0	0
0.7	1.87	23	5.38	2.04	5.17	1.17	1	59	2	4	2	0	1	#NULL!	#NULL!	1	0	1
0.7	1.85	24.3	5.2	1.55	5.41	1.07	1	50	2	5	3	1	2	4	0	0	0	0
0.7	1.82	21.4	5.27	1.43	7.37	1.29	2	55	2	5	3	0	2	4	0	0	0	0
0.7	1.77	21.8	5.72	1.16	5.18	1.48	2	68	2	5	3	0	1	3	0	0	0	1
0.7	1.73	23.3	5.34	1.02	4.59	1.74	2	75	2	5	3	0	1	4	0	1	0	0
0.7	1.7	24.5	5.72	1.24	5.51	1.84	1	49	2	5	3	0	2	4	0	0	0	1
0.7	1.69	24.5	4.46	0.75	5.04	1.13	1	67	2	5	4	0	1	3	1	0	0	0
0.7	1.67	23.9	4.25	0.85	5.72	1.04	2	48	2	5	5	0	2	4	0	0	0	0
0.7	1.61	27.3	5.94	1.01	5.41	1.57	2	63	2	4	3	0	3	4	0	0	0	1
0.7	1.58	23.4	5.22	0.55	4.34	1.64	1	64	2	3	3	0	2	4	0	1	0	0
0.7	1.54	23.5	3.31	1.22	6.08	0.87	1	78	2	4	3	0	1	5	1	1	0	0
0.7	1.45	26.1	6.39	7.27	5.11	1.27	2	49	2	4	3	0	2	5	0	0	0	1
0.7	1.4	20.5	5.32	0.44	5.48	1.63	2	47	2	5	4	0	2	4	0	0	0	0
0.7	1.35	19.6	5.5	0.7	5.12	1.69	2	56	2	4	2	0	2	3	0	0	0	0
0.7	1.11	25.4	4.28	1.74	4.73	1.22	2	31	2	4	3	0	2	4	0	0	0	1
0.7	1	25.3	4.4	1.68	5.12	1	1	56	2	2	3	0	2	5	0	0	0	0
0.7	0.83	25.2	3.9	1.82	5.25	0.88	2	45	2	3	3	0	1	4	0	0	0	1
0.7	0.82	24.6	3.35	1.34	5.44	1.18	2	54	2	5	3	0	1	6	0	0	0	0
0.7	0.74	21.1	2.67	1.39	5.85	1.01	1	63	2	3	2	1	3	2	1	0	0	0
0.6	3.4	23.2	5.96	1.98	8.62	1.09	1	53	2	4	3	1	2	2	0	0	0	1
0.6	3.26	23.9	6.25	1.41	5.24	1.29	2	61	2	4	3	0	1	2	0	1	0	1
0.6	3.18	23.9	5.99	2.05	4.96	1.26	1	45	2	5	3	0	1	3	0	1	0	1
0.6	3.07	22.5	7.1	0.92	5.64	2.87	2	51	2	4	3	0	2	3	0	0	0	1
0.6	3.06	29.8	5.57	1.54	5.98	1.12	1	69	2	5	3	2	2	4	0	1	0	0
0.6	2.99	20	6.27	1.3	5.09	1.52	1	70	2	4	3	0	1	2	0	0	0	1
0.6	2.98	22.6	6.97	2.16	6.53	1.15	1	60	2	5	3	0	2	4	0	0	0	1
0.6	2.96	23.8	5.23	1.39	5.75	1.03	1	52	2	5	3	1	1	4	0	1	0	0
0.6	2.93	25.5	5.78	1.64	5.42	1.18	2	56	2	4	3	0	2	5	0	0	0	1
0.6	2.84	28.7	5.93	2.97	5.58	1.34	2	53	2	5	3	0	1	3	0	1	1	1
0.6	2.83	27	5.62	3.48	5.72	1.04	1	67	2	3	3	0	3	2	0	0	0	1
0.6	2.83	27	5.62	3.48	5.72	1.04	1	67	2	3	3	0	3	2	0	0	0	1
0.6	2.78	31.9	6.02	1.67	6.2	1.16	2	53	2	3	3	0	3	3	0	0	0	1
0.6	2.78	20.5	5.54	2.15	9.16	1.23	2	67	2	4	3	0	1	4	0	0	0	1
0.6	2.77	25	6.33	1.05	5.57	1.49	2	52	2	5	4	0	2	4	0	0	0	1
0.6	2.72	23.1	6.18	0.95	5.45	1.6	2	49	2	5	4	0	3	3	0	0	0	1
0.6	2.7	24.5	4.9	1.61	4.51	0.85	2	47	2	5	3	0	1	3	0	0	0	0
0.6	2.67	26	6.55	2.3	6.68	1.48	2	70	4	2	2	0	2	2	0	0	0	1
0.6	2.66	21	5.62	3.95	5.7	1.18	1	50	2	4	3	1	3	3	1	0	0	1
0.6	2.64	23.3	5.69	2.11	5.62	1.08	1	62	2	3	4	1	2	2	1	0	0	1
0.6	2.63	25.6	5.54	1.79	5.27	1.03	2	45	2	3	2	0	2	5	0	1	0	1
0.6	2.63	27.7	5.62	0.93	6.38	1.28	1	73	2	5	3	2	3	3	1	1	1	1
0.6	2.61	25.3	4.92	1.06	8.06	1.18	1	65	2	2	3	1	3	1	1	0	0	1
0.6	2.61	22.7	5.21	1.12	4.94	1.11	1	57	2	4	2	0	2	3	0	1	0	0
0.6	2.58	27.3	5.96	2.85	6.01	1.3	1	46	2	4	3	1	1	3	1	0	0	1
0.6	2.57	24.9	5.13	1.93	4.61	1.16	2	54	2	3	3	0	2	3	0	1	0	1
0.6	2.55	23.7	4.8	1.13	5.35	1.13	2	50	2	3	3	0	2	2	0	0	0	0
0.6	2.51	26	6.4	3.05	5.33	1.16	1	49	2	4	3	1	3	4	1	1	0	1
0.6	2.51	27.6	4.78	2.35	5.77	0.88	2	52	2	4	3	0	3	3	0	1	0	1
0.6	2.49	21.1	4.72	2.78	5.08	0.84	1	68	2	5	3	2	3	4	1	0	0	1
0.6	2.49	21.1	4.75	1.48	6.05	1.11	2	51	2	5	3	0	1	5	0	0	0	0
0.6	2.47	28.9	7.33	1.62	5.81	1.58	2	62	2	4	2	0	2	2	0	1	0	1
0.6	2.43	22.7	5.6	0.84	5.05	1.55	2	51	2	5	3	0	2	5	0	1	0	0
0.6	2.4	27.5	4.59	1.6	7.51	0.88	1	66	2	5	3	0	1	4	0	1	1	0
0.6	2.35	19	4.96	1.11	5.38	1.16	1	70	2	3	2	0	1	2	0	0	0	0
0.6	2.35	25.8	5.36	0.8	6.14	1.37	2	69	2	1	1	0	3	3	0	1	1	0
0.6	2.32	26.7	4.8	1.57	5.34	1.15	2	67	2	3	2	0	3	2	0	0	0	1
0.6	2.31	24.3	5.3	2.49	5.66	1.32	1	47	2	4	3	2	2	3	1	0	0	1
0.6	2.23	29.7	4.41	1.08	7.09	1.02	1	47	2	5	4	1	3	2	0	1	1	0
0.6	2.21	28.3	4.72	1.59	4.63	1.38	1	53	2	5	4	0	2	4	0	0	0	1
0.6	2.17	21	4.46	1.06	5.24	1.12	2	45	2	5	3	0	2	4	0	0	0	0
0.6	2.12	20.7	4.94	1.29	5.01	1.1	2	49	2	5	3	0	1	3	0	0	0	0
0.6	2.09	24.2	5.48	1.53	5.28	1.16	2	46	2	5	3	0	2	3	0	0	0	0
0.6	2.09	22.9	4.8	0.83	5.1	1.54	2	50	2	4	3	0	1	3	0	0	0	0
0.6	2.09	19.1	3.91	0.71	5.23	1.11	1	73	2	3	3	0	1	2	0	0	0	1
0.6	2.09	23	4.2	1.05	4.75	0.97	2	51	2	4	3	0	2	3	0	0	0	0
0.6	2.05	28.4	4.59	2.16	8.9	1.08	2	65	2	2	2	0	1	3	0	1	1	1
0.6	2.04	20.5	5.09	1.01	4.79	1.72	2	48	2	5	3	0	1	4	0	0	0	0
0.6	2.03	25.3	4.05	1.5	7.12	0.84	1	68	2	3	3	1	3	5	0	1	0	1
0.6	2.02	17.2	4.71	1.12	5.02	1.45	1	45	2	5	3	0	2	2	0	0	0	0
0.6	1.97	27.5	4.06	0.92	5.68	0.91	1	66	2	3	3	0	2	4	0	0	0	0
0.6	1.94	26.9	4.1	1.21	6.92	1.05	1	70	2	3	3	2	3	3	0	1	0	1
0.6	1.91	26.3	4.48	6.08	6.01	0.9	2	65	2	4	3	0	2	3	0	1	0	1
0.6	1.91	24.3	5.98	1.84	5.01	1.31	1	37	2	3	3	1	1	4	0	0	0	1
0.6	1.86	30.1	5.51	1.35	5.44	1.13	2	35	2	3	2	0	2	4	0	0	0	0
0.6	1.81	25.2	4.66	1.3	5.56	1.11	1	46	2	5	4	1	1	3	0	1	0	0
0.6	1.79	23.8	4.22	1.64	4.87	1.18	2	56	2	4	3	0	1	4	0	0	0	0
0.6	1.76	23.3	4.21	0.5	4.37	1.45	1	48	2	5	3	0	2	3	0	0	0	0
0.6	1.72	23.3	3.98	0.59	4.6	1.19	2	47	2	4	3	0	3	4	0	0	0	0
0.6	1.72	21.2	3.94	1.3	4.76	0.95	1	64	2	5	3	0	1	4	0	0	0	0
0.6	1.7	25	5.53	1.52	4.56	1.29	1	51	2	5	3	1	1	3	0	0	0	0
0.6	1.57	20.8	4.51	0.6	5.27	1.41	2	47	2	5	3	0	1	4	0	0	0	0
0.6	1.52	26.7	4.59	0.8	5.45	0.97	1	51	2	5	3	0	2	5	0	1	0	0
0.6	1.52	24.9	4.89	0.75	4.97	1.71	2	55	2	4	2	0	1	2	0	1	0	0
0.6	1.51	27.8	5.41	1.88	5.6	1.06	1	49	5	4	3	0	2	3	0	1	0	1
0.6	1.47	25.6	4.01	1.48	6.98	1.09	1	69	2	1	3	1	3	3	1	0	0	0
0.6	1.43	24.8	4.46	1.16	5.64	1.03	2	47	2	5	5	0	2	3	0	0	0	0
0.6	1.43	24.6	3.57	1.63	5.02	0.89	1	68	2	5	3	1	1	4	0	0	0	1
0.6	1.36	25.9	2.65	0.99	6.37	0.77	1	65	2	4	3	1	2	3	1	0	1	1
0.6	1.19	25.8	3.95	0.91	5.1	1.18	2	63	2	2	2	0	1	3	0	0	0	0
0.6	1.11	24	4.79	1.08	6.86	1.45	2	51	2	3	3	0	1	4	0	0	0	0
0.6	1.11	22.9	3.47	1.21	7.33	1.04	1	71	2	3	3	0	1	4	0	1	1	0
0.6	0.87	25.3	2.85	1.13	5.63	0.84	1	66	2	2	2	0	2	3	1	1	0	0
0.5	4.02	22.5	7	1.45	5.53	1.46	2	51	2	4	3	0	2	4	0	0	0	1
0.5	3.81	24.7	7.06	2.56	5.26	1.1	2	50	2	3	3	0	1	4	0	1	0	1
0.5	3.57	25.7	6.76	1.75	5.13	1.03	1	64	2	4	3	2	2	3	0	1	0	1
0.5	3.56	20.1	7.18	2.39	7.14	1.46	1	54	2	5	3	1	3	3	1	1	0	1
0.5	3.51	24.3	6.17	1.78	5.12	1.17	1	49	2	5	3	0	2	3	0	1	0	1
0.5	3.42	23.9	6.19	1.68	5.71	1.29	1	56	2	3	3	0	2	3	0	0	0	1
0.5	3.4	24.2	6.74	2.61	4.74	1.39	1	61	2	3	3	0	1	2	0	1	0	1
0.5	3.4	24.2	6.74	2.61	4.74	1.39	1	61	2	3	3	0	1	2	0	1	0	1
0.5	3.35	28.5	6.29	3.01	6.16	1.15	1	52	2	3	3	0	3	5	0	1	0	1
0.5	3.35	28.5	6.29	3.01	6.16	1.15	1	52	2	3	3	0	3	5	0	1	0	1
0.5	3.29	25.6	6.82	5.57	7.97	1.36	1	55	2	5	3	0	1	4	1	1	0	1
0.5	3.08	24.8	5.09	2.38	4.87	0.86	1	46	2	5	3	1	1	3	0	0	0	1
0.5	3.03	23.5	5.37	0.97	5.52	0.98	1	77	2	5	3	0	1	4	0	1	0	0
0.5	3	28	5.81	2.92	6.41	1.16	1	56	2	4	3	1	2	3	1	0	0	1
0.5	2.98	24.7	6.31	2.16	5.2	1.24	1	58	2	4	3	0	3	3	1	0	0	1
0.5	2.94	21.8	5.95	4.13	17.16	1.1	1	50	2	5	3	0	3	3	0	1	1	1
0.5	2.87	24.1	5.25	2.79	5.22	0.8	1	56	2	4	3	0	2	5	0	0	0	1
0.5	2.76	25.8	5.54	3	5.18	1.01	1	63	2	5	3	0	3	4	1	1	0	1
0.5	2.65	24.6	5.32	1.28	6.11	1.24	1	45	2	4	3	1	3	4	1	0	0	0
0.5	2.57	23	5.34	4.64	5.72	1.11	1	47	2	3	3	0	2	4	0	1	0	1
0.5	2.55	22.3	5.55	1.04	4.46	1.36	2	60	2	4	3	0	3	5	0	1	0	1
0.5	2.55	26.1	4.77	2.14	5.82	1	1	51	2	5	3	0	2	3	0	1	0	1
0.5	2.54	19.9	5.78	0.78	4.67	1.62	2	46	2	5	3	0	2	2	0	0	0	1
0.5	2.46	32.4	5.42	3.87	11.3	1.26	2	50	2	4	3	0	1	4	0	1	0	1
0.5	2.43	27.3	5.69	1.5	5.79	1.13	2	56	2	4	3	0	1	4	0	1	0	0
0.5	2.41	26.2	5.43	1.62	5.89	1.24	1	52	2	5	3	2	2	4	1	1	0	0
0.5	2.4	21.4	7.39	1.52	4.85	1.42	2	54	2	3	3	0	1	4	0	0	0	1
0.5	2.39	20.1	6.49	0.83	5.2	1.89	2	46	2	5	3	0	2	4	0	0	0	1
0.5	2.38	24.5	5.19	1.72	4.76	1.05	2	65	2	1	3	0	2	3	0	0	0	1
0.5	2.34	24.3	4.77	0.98	4.85	1.08	2	49	2	5	3	0	2	3	0	1	0	0
0.5	2.32	30.6	5.15	2.92	4.91	1.07	2	59	2	4	3	0	2	3	0	1	0	1
0.5	2.24	26.8	3.97	0.83	5.28	1.1	1	69	2	3	3	0	2	2	1	0	0	0
0.5	2.2	28.9	5.42	1.51	5.23	1.41	1	51	2	5	3	0	2	4	1	1	0	0
0.5	2.2	25	5.7	2.7	8.07	1.36	1	70	2	3	3	2	2	3	0	1	0	1
0.5	2.19	24.8	4.76	10.9	8.29	0.84	1	54	2	4	3	1	2	3	0	0	0	1
0.5	2.11	27.8	4.37	3.25	7.86	0.9	1	56	2	5	3	1	1	4	0	0	0	1
0.5	2.09	24.6	5.49	2.58	5.16	1.08	1	47	2	4	3	0	2	4	0	0	0	1
0.5	2.08	29.2	6.49	4.51	5.67	1.23	1	51	2	5	3	0	3	4	1	0	0	1
0.5	2.07	28.6	4.76	1.38	6.05	1.05	1	68	2	4	3	1	2	2	1	1	0	1
0.5	1.98	24.8	6.72	1.05	5.15	2.37	2	53	2	5	3	0	1	3	0	1	0	1
0.5	1.94	25.6	4.23	1.31	6.65	0.92	1	47	2	5	3	0	1	4	0	1	0	0
0.5	1.89	26.8	5.82	2	5.35	1.39	2	53	2	3	3	0	2	3	0	0	0	1
0.5	1.83	25	5.46	1.82	5.71	1.41	1	59	2	5	3	2	3	3	0	1	0	1
0.5	1.75	21.8	3.77	0.59	4.85	1.09	1	53	2	4	2	0	2	3	0	0	0	0
0.5	1.73	24.6	4.19	1.41	5.36	1.03	1	63	2	3	3	1	3	3	0	1	0	0
0.5	1.68	30	5.68	2.35	5.23	1.28	2	56	2	3	3	0	3	2	0	1	0	1
0.5	1.66	23.8	4.74	0.52	4.97	2.19	2	47	2	5	3	0	2	4	0	0	0	0
0.5	1.47	24.3	4.5	2.48	4.59	0.98	1	61	2	3	3	0	1	3	0	1	0	1
0.5	1.36	26.2	3.58	2.06	8.5	0.98	1	63	2	4	3	0	2	5	0	0	0	1
0.5	1.3	23.3	4.93	0.79	4.91	1.13	2	45	2	5	3	0	2	4	0	0	0	0
0.5	1.29	24.7	5.09	2.45	6.2	1.12	1	52	2	3	3	1	1	1	1	1	0	1
0.5	1.29	22.8	3.99	1.48	4.56	1.1	2	48	2	5	3	0	2	3	0	0	0	0
0.5	1.27	18.9	3.85	1.26	4.64	1.34	2	47	2	5	3	0	2	5	0	0	0	0
0.5	1.18	22.9	3.53	0.8	4.75	1.25	2	46	2	4	3	0	1	3	0	1	0	0
0.5	1.18	28.6	3.66	0.81	9.31	1.09	1	59	2	5	3	0	1	4	0	1	0	0
0.5	0.96	25.7	4.09	2.69	4.97	0.92	1	50	2	5	3	0	1	3	0	1	0	1
0.5	0.94	24.3	4.31	3.17	5.66	1.02	2	49	2	3	2	0	2	5	0	1	0	1
0.5	0.89	25.8	3.61	2.57	8.63	0.79	1	55	2	5	3	0	2	2	0	0	0	1
0.5	0.6	26	3.32	2.33	6.15	1	1	63	2	3	3	0	3	5	0	0	0	1
0.4	3.8	26.4	7.58	1.39	7.79	1.36	1	71	2	4	3	0	3	3	0	1	1	1
0.4	3.76	27.6	6.96	1.44	5.11	1.71	2	50	2	4	3	0	2	4	0	0	0	1
0.4	3.54	34.9	6.21	1.81	6.75	1.16	2	52	2	4	3	0	2	2	0	0	0	1
0.4	3.51	28.6	6.78	1.1	6.03	1.82	2	55	2	3	2	0	3	4	0	1	0	1
0.4	3.4	20.9	7.03	1.09	5.42	1.83	2	58	2	4	3	0	2	2	0	1	0	1
0.4	3.37	23.1	6.18	1.6	4.63	1.45	2	46	2	5	3	0	1	4	0	0	0	1
0.4	3.27	26.2	5.58	1.2	4.77	0.98	1	62	2	2	3	1	2	3	0	0	0	0
0.4	3.26	28.1	6.09	2.43	5.15	1.09	1	63	2	5	3	1	3	4	1	1	0	1
0.4	3.23	25.4	5.81	3.18	5.84	1.13	1	62	2	5	3	0	2	3	0	1	0	1
0.4	3.21	27.6	5.73	2.17	6.77	1.06	1	58	2	4	3	0	2	4	0	1	0	1
0.4	3.21	25	7.23	1.48	6.22	1.38	2	70	2	3	3	0	1	3	0	0	0	1
0.4	3.04	24	5.98	7.59	9.49	0.98	1	54	2	4	3	1	2	4	1	1	0	1
0.4	3.02	24.6	5.92	3.85	7.11	1.19	2	65	2	5	3	0	1	4	0	1	0	1
0.4	2.94	25.7	7.54	1.74	5.93	1.83	2	67	2	3	3	0	2	4	0	0	0	1
0.4	2.88	26.9	6.19	1.59	6.19	1.85	2	75	2	3	3	0	1	2	0	1	0	1
0.4	2.87	28.5	5.28	1.11	5.19	1.03	2	69	2	2	4	0	3	4	0	1	0	0
0.4	2.77	29.5	5.57	1.38	4.89	1.17	1	63	2	3	3	1	1	5	0	1	0	0
0.4	2.76	21	4.99	1.51	4.78	1.02	2	66	2	2	2	0	3	2	0	1	0	0
0.4	2.75	27.8	5.77	1	6.04	1.58	1	62	2	4	3	0	2	4	0	1	0	1
0.4	2.72	30.4	6.21	1.87	7.54	1.3	2	63	2	2	2	0	3	2	0	1	0	1
0.4	2.71	31.4	5.29	1.41	5.27	1.25	2	59	2	3	3	0	2	3	0	1	0	0
0.4	2.63	23.3	5.51	1.55	5.2	1.24	2	70	2	4	2	0	2	2	0	0	0	0
0.4	2.61	18.9	6.08	1.23	4.93	1.59	2	53	2	5	3	0	1	3	0	0	0	1
0.4	2.59	23	5.42	1	5.12	1.49	1	58	2	4	2	1	2	3	1	0	0	0
0.4	2.58	22	4.49	2.36	4.93	0.79	1	51	2	4	2	1	2	4	0	0	0	1
0.4	2.54	25.2	5.39	1.84	5.1	1.22	2	49	2	4	3	0	3	2	0	0	0	1
0.4	2.54	24.5	5.02	2.59	5.78	1.01	1	48	2	5	3	0	1	4	0	1	0	1
0.4	2.53	24.8	5.99	5.27	8.26	1.21	2	56	2	4	2	0	3	3	0	1	0	1
0.4	2.51	30.9	4.66	1.49	4.73	0.95	1	62	2	3	2	1	2	3	0	0	0	0
0.4	2.49	21.8	4.71	0.69	5.14	0.99	1	62	2	4	2	2	3	3	0	1	0	0
0.4	2.45	25.3	4.48	1.8	5.45	0.83	1	46	2	5	3	0	2	3	0	0	0	1
0.4	2.42	23.8	5.12	2.43	4.89	1.03	2	51	2	4	3	0	1	4	0	0	0	1
0.4	2.37	28.3	6.05	1.84	8.52	1.18	1	49	2	5	3	1	1	4	1	1	0	1
0.4	2.3	22.4	4.81	5.49	9.35	0.84	2	59	2	3	3	0	3	3	0	0	0	1
0.4	2.23	25.3	4.43	1.84	5	0.92	1	57	2	4	3	1	2	4	1	1	0	1
0.4	2.08	28.1	4.69	1.25	5.83	1.32	1	52	2	4	3	1	3	3	0	0	0	0
0.4	2.03	24.8	4.36	0.87	4.87	1.09	2	48	99	4	3	0	2	2	0	0	0	0
0.4	2.02	26.2	4.17	0.73	5.74	1.1	1	74	2	3	3	2	3	3	0	1	0	0
0.4	2.01	26.8	5.72	1.6	5.52	1.06	1	49	2	5	3	1	2	4	1	1	0	1
0.4	2	25.9	4.52	0.94	6.34	1.31	2	74	2	2	2	0	2	3	0	1	0	0
0.4	1.96	23.6	5.74	3.24	4.84	1.13	1	46	2	4	3	1	3	4	1	1	0	1
0.4	1.93	23.5	5.16	1.07	5.01	1.39	2	48	2	5	2	0	2	3	0	0	0	0
0.4	1.83	26.5	5.27	1.89	5.31	1.08	2	49	2	5	3	0	2	4	0	0	0	1
0.4	1.8	25	5.4	1.04	4.76	1.8	2	47	2	4	3	0	2	2	0	0	0	0
0.4	1.78	28.1	3.46	0.76	5.4	1.13	1	77	2	3	4	0	1	5	1	1	0	0
0.4	1.71	19	4.43	2.33	13.86	1.18	1	82	2	3	3	1	2	3	0	0	0	1
0.4	1.68	23	4.39	2.06	5.78	1.2	2	46	2	4	3	0	1	4	0	0	0	1
0.4	1.64	25.2	5.26	1.62	4.86	1.39	2	51	2	5	3	0	1	3	0	1	0	0
0.4	1.62	24.3	5.98	3.06	6.93	1.35	1	57	2	3	2	0	2	5	0	1	0	1
0.4	1.61	26.1	3.97	3.5	4.76	0.88	1	67	2	3	3	1	2	3	0	1	0	1
0.4	1.59	27.2	4.73	1.34	4.59	1.02	2	46	2	5	3	0	1	4	0	0	0	0
0.4	1.5	22.8	3.58	1.43	5.69	0.94	2	45	2	5	2	0	2	4	0	0	0	0
0.4	1.45	23.9	4.82	0.93	4.66	1.05	1	51	2	4	3	1	2	4	0	0	0	0
0.4	1.45	21.5	4.98	1.56	5.24	1.91	1	53	2	5	3	0	2	4	1	1	0	0
0.4	1.44	28	3.53	1.62	5.16	1.05	1	72	2	3	3	0	2	4	1	0	0	0
0.4	1.41	26.6	4.11	0.82	6.43	1.21	1	62	2	5	3	0	2	3	0	1	0	0
0.4	1.4	24.4	5.06	1.85	5.8	1.09	1	48	2	5	3	2	1	3	0	1	0	1
0.4	1.38	25.4	3.82	1.56	7.14	0.94	2	62	2	3	3	0	2	4	0	1	0	0
0.4	1.37	27.2	4.78	1.29	7.86	1.03	1	50	2	5	3	1	1	4	0	0	1	0
0.4	1.31	25	4.34	1.57	4.83	1.09	2	54	2	5	3	0	2	5	0	0	0	0
0.4	1.22	22.4	3.42	1.2	4.95	1.06	2	61	2	4	3	0	1	4	0	1	0	0
0.4	1.13	18.9	4.47	0.71	5.79	1.37	2	50	2	5	3	0	1	4	0	0	0	0
0.4	1.04	24	3.98	0.73	5.01	1.08	1	73	2	3	2	2	2	3	0	0	0	0
0.4	1.02	19.7	3.63	1.92	4.83	1.05	2	50	2	5	3	0	2	3	0	0	0	1
0.4	0.97	28.9	4.56	2.94	5.15	0.93	1	53	2	4	3	1	3	3	0	1	0	1
0.4	0.66	23.3	3.7	3.74	10.04	0.83	1	47	2	5	3	0	2	3	0	1	1	1
0.3	3.87	23.6	6.87	1.24	12.94	1.38	1	71	2	4	3	1	1	5	0	0	0	1
0.3	3.52	19.4	6.89	0.69	5.9	1.66	2	51	2	4	3	0	2	4	0	0	0	1
0.3	3.28	28.9	7.07	10.5	5.01	1.19	2	55	2	3	2	0	2	5	0	0	0	1
0.3	3.21	25.6	6.19	3.89	5.38	1.08	1	50	2	5	3	2	1	4	0	1	0	1
0.3	3.1	23.3	6	1.24	5.95	0.93	1	45	2	5	3	0	2	4	1	0	0	1
0.3	3.05	26.9	5.62	1.24	5.46	1.15	2	67	99	5	3	0	1	3	0	1	0	0
0.3	3.03	23.9	5.56	2.23	6.18	1.08	1	49	2	5	3	1	1	4	0	1	0	1
0.3	3.02	26.2	5.91	1.39	4.77	1.29	1	71	2	1	3	1	2	4	1	1	0	1
0.3	2.89	17.2	5.64	1.12	5.3	1.23	1	62	2	4	3	1	1	5	0	0	0	0
0.3	2.89	26.1	5.75	2.09	9.35	1.08	2	56	2	3	3	0	2	4	0	0	0	1
0.3	2.88	23.2	6.25	2.21	5.56	1.18	2	48	2	5	3	0	3	4	0	0	0	1
0.3	2.8	31.6	5.7	1.85	5.97	1.08	1	65	2	4	2	0	2	2	0	1	0	1
0.3	2.75	22.8	4.89	1	5.3	1.42	1	61	2	5	3	1	2	2	0	1	0	0
0.3	2.71	27.4	5.32	1.11	6.41	1.2	2	48	2	5	2	0	2	4	0	0	0	0
0.3	2.67	23.9	5.91	1.75	5.71	1.61	2	61	2	4	3	0	1	3	0	1	0	1
0.3	2.66	25.9	4.97	1.71	6.64	1.01	1	61	2	4	3	1	1	5	0	0	0	1
0.3	2.55	23.7	4.83	2.29	4.77	0.89	2	53	2	5	2	0	2	4	0	0	0	1
0.3	2.41	26.7	5.24	1.29	6.16	1.19	2	52	2	4	3	0	1	3	0	1	0	0
0.3	2.4	28.4	5.64	4.43	5.02	1.1	2	56	2	4	3	0	1	3	0	1	0	1
0.3	2.39	29	5.18	2.3	5.42	0.95	1	46	2	5	3	1	3	3	1	1	0	1
0.3	2.38	26	4.93	2.93	5.31	0.98	1	51	2	5	3	0	1	3	0	1	0	1
0.3	2.37	26.3	5.3	2.85	5.78	1.12	2	69	2	3	2	0	1	4	0	1	0	1
0.3	2.33	28	4.81	0.83	5.27	1.24	2	61	2	3	2	0	2	4	0	0	0	0
0.3	2.33	31.9	5.51	0.97	5.1	1.47	1	65	2	3	3	0	3	2	0	0	0	0
0.3	2.3	23.1	5.65	3.68	4.61	1.25	1	57	2	5	3	1	3	4	1	1	0	1
0.3	2.28	32	4.4	1.32	4.63	0.92	1	47	2	5	3	1	1	4	0	1	0	0
0.3	2.27	26.5	4.52	3.26	5.05	0.85	1	52	2	5	3	0	3	4	1	1	0	1
0.3	2.25	27.5	6.79	1.97	4.79	1.54	2	51	2	5	3	0	1	3	0	0	0	1
0.3	2.24	21.7	5.34	1.49	5.22	1	1	48	2	5	3	0	1	4	0	0	0	0
0.3	2.21	24.9	4.49	3.81	6.89	0.96	2	66	2	4	3	0	2	4	0	1	0	1
0.3	2.21	25.4	5.7	1.91	4.7	1.03	1	48	2	5	3	1	2	2	0	1	0	1
0.3	2.18	28	5.61	1.78	5.1	0.99	1	45	2	5	3	0	1	#NULL!	0	0	0	1
0.3	2.15	22.7	4.32	1.06	4.77	1.04	1	47	2	5	3	1	1	4	0	0	0	0
0.3	2.11	21	4.73	0.97	4.25	1.33	2	48	2	5	3	0	2	4	0	0	0	0
0.3	2.1	23.9	4.01	1.76	7.72	0.74	1	76	2	5	3	0	2	4	0	1	0	1
0.3	2.1	26.1	4.74	3.54	6.58	1.03	2	66	2	2	2	0	2	3	0	1	1	1
0.3	2.09	26.5	4.55	1.2	5.45	1.02	2	47	2	5	3	0	3	3	0	0	0	0
0.3	2.08	32.4	4.19	0.79	7.72	0.99	1	46	2	5	3	0	1	4	0	0	0	0
0.3	2.02	22.2	5.39	1.72	4.68	1.18	2	47	2	5	4	0	2	3	0	0	0	1
0.3	1.94	21.6	4.41	0.59	5.07	1.18	2	45	2	5	3	0	1	4	0	0	0	0
0.3	1.86	20.7	4.56	0.9	5.59	0.97	1	64	2	4	2	2	1	2	0	0	1	0
0.3	1.85	28.7	4.35	1.26	4.72	1.17	1	45	2	4	3	0	1	5	1	1	0	0
0.3	1.81	25.8	4.83	1.92	11.79	1.07	1	54	2	5	3	1	2	3	1	0	1	1
0.3	1.78	34	4.31	1.15	7.29	1.42	2	49	2	5	3	0	2	4	0	1	0	0
0.3	1.77	22.8	4.44	1.03	5.28	1.22	2	52	2	5	4	0	2	3	0	0	0	0
0.3	1.77	22.7	5.63	2.29	4.88	1.18	1	46	2	5	3	0	2	4	0	0	0	1
0.3	1.77	24.8	4.67	0.76	4.54	1.26	2	55	2	4	3	0	1	2	0	0	0	0
0.3	1.76	29.7	4.66	1.35	5.18	0.91	1	49	2	5	3	0	1	4	0	1	0	0
0.3	1.76	23.9	4.42	1.17	5.48	1.16	1	61	2	3	3	0	1	5	0	0	0	1
0.3	1.62	24.4	5.13	1.19	4.82	1.2	1	72	2	2	2	0	3	3	1	0	0	0
0.3	1.61	22	4.17	0.88	5.91	1.37	2	51	2	5	3	0	2	3	0	0	0	0
0.3	1.56	26.8	5.08	1.23	5.59	1.08	1	67	2	2	2	2	2	3	0	1	0	0
0.3	1.55	27.5	5.08	0.84	5.08	1.66	2	52	2	4	3	0	2	3	0	1	0	0
0.3	1.49	27.4	4.74	1.08	4.95	1.09	1	65	2	5	3	2	3	4	0	0	0	0
0.3	1.48	30.8	4.21	2.35	5.8	1.07	1	73	2	2	2	0	3	5	0	1	0	1
0.3	1.44	24.3	3.99	1.52	5.04	1.51	1	65	2	3	3	1	3	3	1	0	0	0
0.3	1.41	26.5	3.86	1.25	5.01	1.38	1	66	2	5	3	0	2	4	1	1	0	1
0.3	1.36	23.3	4.64	0.77	4.83	1.24	1	45	2	5	5	0	2	3	0	0	0	0
0.3	1.32	22.9	4.64	1.35	4.87	0.93	1	61	2	4	3	0	2	3	0	1	0	0
0.3	1.31	27.2	3.11	1.01	8.67	0.73	1	59	2	3	4	1	2	2	0	1	1	1
0.3	1.28	22.4	3.72	1.18	5	0.98	1	47	2	4	3	1	2	6	1	0	0	0
0.3	1.28	26	4.57	0.64	4.3	1.52	2	56	2	4	3	0	2	3	0	0	0	0
0.3	1.21	27.5	5.09	1.45	5.22	1.16	1	57	2	4	3	1	2	4	0	0	0	0
0.3	1.19	27.5	4.87	0.93	4.75	1.28	1	56	2	4	3	1	2	3	0	1	0	0
0.3	1.18	25.3	3.5	2.79	4.96	0.92	1	69	2	5	3	0	1	4	0	1	0	1
0.3	1.09	21.6	3.96	0.64	5	1.43	2	47	2	3	3	0	2	4	0	0	0	0
0.3	0.84	19.5	3.61	1.05	5.19	1.15	2	46	2	5	3	0	2	3	0	0	0	0
0.2	3.7	28.4	6.19	2.49	15.77	1.04	1	46	2	4	3	0	2	3	1	1	1	1
0.2	3.54	20.5	6.94	1.35	5.51	1.96	2	47	2	5	3	0	1	2	0	0	0	1
0.2	3.39	22.9	6.34	1.46	7.75	1.42	2	79	2	5	3	0	1	2	0	1	1	1
0.2	3.27	25.3	6.21	5.36	6.59	1.03	1	52	2	5	3	1	3	2	1	1	0	1
0.2	3.13	29.5	6.13	1.56	6.16	1.36	2	66	2	3	3	0	2	3	0	1	0	1
0.2	3.06	26.8	5.78	3.42	4.93	1.2	1	66	2	3	3	0	2	2	1	1	0	1
0.2	3	24.8	5.81	0.69	10.46	1.36	1	67	99	3	3	0	2	3	1	1	1	1
0.2	2.99	26.3	4.94	2.32	5.24	1.09	1	58	2	4	3	0	2	3	0	0	0	1
0.2	2.97	24	5.65	1.58	5.61	1.09	2	56	2	3	3	0	1	4	0	0	0	0
0.2	2.89	22.2	5.94	1.64	6.27	1.16	1	66	2	4	2	0	1	2	0	1	0	1
0.2	2.85	26.6	5.6	1.9	6.01	1.08	1	48	2	5	3	1	1	3	0	0	0	1
0.2	2.83	23	5.21	1.26	4.9	1.02	1	54	2	4	3	0	3	4	0	0	0	0
0.2	2.76	30.9	4.99	1.95	4.82	0.9	1	55	2	4	3	2	1	4	1	1	0	1
0.2	2.7	21.9	5.15	2.84	4.63	1.04	2	79	2	4	3	0	2	3	0	0	0	1
0.2	2.7	30	5.62	1.44	5.7	1.41	1	62	2	5	4	0	3	2	0	1	0	0
0.2	2.6	19.3	7.25	1.42	5.02	2.11	2	49	2	5	3	0	2	4	0	0	0	1
0.2	2.55	28.5	5.93	1.38	5.09	1.02	2	60	2	5	3	0	1	3	0	1	0	1
0.2	2.39	23	5.3	0.94	5.24	1.48	2	59	2	4	3	0	2	2	0	0	0	0
0.2	2.38	22.2	4.9	0.89	4.7	1.32	2	49	2	5	3	0	2	5	0	0	0	0
0.2	2.34	30.3	4.6	2.34	5.13	1.5	2	63	2	1	1	0	2	3	0	0	0	1
0.2	2.29	29.1	4.72	2.08	7.25	1.07	2	63	2	3	3	0	2	4	0	1	1	1
0.2	2.27	27	4.45	2.61	5.46	1.12	1	51	2	5	3	1	1	3	0	1	0	1
0.2	2.22	29.6	5.01	5.6	9.13	1.07	1	48	2	5	3	1	3	4	0	0	0	1
0.2	2.22	24.7	4.53	1.32	4.96	1.14	1	74	2	5	3	0	2	3	0	0	0	0
0.2	2.2	20.7	5.37	0.57	4.97	2.06	2	46	2	5	3	0	1	3	0	0	0	0
0.2	2.1	21.7	5.14	1.04	7.4	1.18	1	60	2	3	2	1	2	3	0	0	0	0
0.2	2.07	29.4	3.97	1.04	5.81	0.84	1	63	2	5	3	0	1	4	0	1	0	0
0.2	2.05	22.7	5.33	1.43	5.18	1.51	2	52	2	5	4	0	2	3	0	1	0	0
0.2	1.98	29.1	3.5	1.09	9.89	0.65	1	58	2	4	3	0	2	4	0	1	0	0
0.2	1.9	22.4	4.02	2.19	4.9	1.03	2	76	2	3	2	0	2	1	0	1	0	1
0.2	1.89	23.3	3.99	1	6.23	1.12	1	66	2	2	3	0	3	3	0	1	0	0
0.2	1.89	23.8	5.6	2.31	5	1.16	2	52	2	3	2	1	2	2	0	0	0	1
0.2	1.82	23.5	4.51	1.85	6.09	1.05	2	53	3	5	2	0	2	4	0	0	0	1
0.2	1.82	29.4	4.75	3.15	5.34	0.89	2	47	2	5	3	0	1	4	0	0	0	1
0.2	1.75	26.2	3.78	2.39	5.34	0.75	1	51	2	5	3	0	2	3	0	1	0	1
0.2	1.74	23.5	4.2	0.84	4.48	1.22	2	53	2	4	2	0	3	2	0	0	0	0
0.2	1.6	20	4.3	0.76	4.55	1.42	2	52	2	4	3	0	2	2	0	0	0	0
0.2	1.59	25.7	3.24	1.4	6.84	0.99	2	68	2	2	3	0	3	4	0	1	1	0
0.2	1.56	26.5	4.89	2.44	5.81	1.07	1	43	2	5	3	0	2	3	0	0	0	1
0.2	1.55	32.5	5.16	1.9	5.58	1	1	49	2	5	3	0	2	3	0	0	0	1
0.2	1.51	26.9	4.75	2.97	6.03	1.07	1	57	2	5	3	0	2	5	0	0	0	1
0.2	1.48	24.8	4.45	2.99	6.54	0.9	1	45	2	5	3	1	2	2	1	1	1	1
0.2	1.46	19.8	4.69	5.83	7.62	1.09	2	63	2	3	3	0	2	4	0	0	0	1
0.2	1.44	27	3.99	1.14	5.37	1.23	2	49	2	4	3	0	2	2	0	1	0	0
0.2	1.4	27.2	4.51	0.63	5.55	1.41	1	64	2	5	3	1	2	2	1	1	0	1
0.2	1.39	19.9	5.42	1.68	4.69	1.46	2	45	2	5	3	0	2	3	0	0	0	0
0.2	1.34	23.9	4.67	2.36	5.71	1.03	2	45	2	5	3	0	1	4	0	0	0	1
0.2	1.3	25	4.32	0.84	5.79	1.39	2	61	2	3	2	0	2	2	0	1	0	0
0.2	1.26	23.8	4.12	1.83	4.58	1.15	1	50	2	5	3	0	2	2	0	1	0	1
0.2	1.26	24.1	4.06	1.61	10.7	1.05	1	47	2	3	3	1	1	4	0	1	1	1
0.2	1.25	21.8	3.07	0.83	5.7	1.03	2	47	2	5	3	0	1	4	0	0	0	0
0.2	1.19	24.6	4.54	0.52	5.97	1.54	1	47	2	5	3	0	2	#NULL!	1	0	0	0
0.2	1.15	25.4	3.06	1.77	5	0.73	1	47	2	4	3	1	3	2	0	1	0	1
0.2	0.95	22.6	4.57	0.96	4.69	1.23	2	48	2	3	3	0	1	3	0	0	0	0
0.2	0.87	21.1	4.77	1.91	4.48	0.98	1	70	2	5	3	1	2	5	0	0	0	1
0.2	0.71	29.7	5.45	12.88	5.03	1.03	1	47	2	5	3	1	1	4	0	1	0	1
0.2	0	27.8	0	0	0	0	1	75	2	5	3	0	3	3	0	1	0	0
0.1	4.05	25.7	7.04	3.1	5.83	1.27	2	50	2	5	3	0	2	4	0	0	0	1
0.1	3.7	27.1	7.22	3.57	5.25	1.3	2	51	2	5	3	0	3	5	0	0	0	1
0.1	3.33	22.3	6.9	18.02	5.42	1.12	2	61	2	1	2	0	2	3	0	0	0	1
0.1	3.24	31.1	5.98	2.75	5.56	1.11	1	49	2	5	3	0	2	4	0	0	0	1
0.1	3.22	27.5	6.45	2.04	6.01	1.28	2	48	2	5	4	0	2	2	0	1	1	1
0.1	3.18	22.1	5.52	2	5.59	1.36	1	67	2	3	3	2	3	2	0	0	0	1
0.1	3.13	24.8	5.63	1.14	5.16	1.61	2	64	2	5	3	0	1	3	0	1	0	0
0.1	3.04	27.8	5.52	2.08	5.3	1.01	2	28	2	5	3	1	3	4	0	0	0	1
0.1	3.04	21.6	5.35	1.84	5.55	1.16	2	56	2	5	4	0	2	3	0	0	0	1
0.1	3.04	31.3	5.7	2.83	5.06	1.04	2	52	2	3	3	0	1	4	0	1	0	1
0.1	3.03	31.2	6.83	1.71	7.8	1.34	1	67	2	3	3	0	3	2	0	0	0	1
0.1	2.94	26.5	5.36	1.64	6.34	1.1	1	66	2	3	3	0	2	3	0	1	0	0
0.1	2.89	24.6	6.2	1.75	5.67	1.08	1	69	2	3	3	0	2	4	1	1	1	1
0.1	2.68	28.8	5.11	1.56	5	1.16	1	65	2	3	2	1	2	2	1	1	0	1
0.1	2.59	19.4	5.12	1.19	5.31	1.12	1	49	2	5	3	0	1	4	1	0	0	0
0.1	2.59	22.5	4.82	2.08	6.36	0.87	1	70	2	2	3	0	2	3	0	1	0	1
0.1	2.55	23.8	5.69	3.19	5.17	1.06	2	64	2	4	4	0	2	2	0	1	0	1
0.1	2.54	24.7	5.41	2.04	5.16	1.15	2	55	2	5	3	0	1	4	0	0	0	1
0.1	2.53	23.5	5.28	0.94	5.18	1.45	1	69	2	5	3	0	2	2	1	1	0	0
0.1	2.52	30.9	4.98	2.26	5.6	1.04	2	47	2	4	3	0	2	5	0	1	0	1
0.1	2.52	24.4	4.79	1.48	5.23	1.01	1	50	2	5	3	0	1	3	0	0	0	1
0.1	2.5	24.6	5.04	2.39	5.26	1.12	1	66	2	3	3	2	3	1	0	1	0	1
0.1	2.48	23.7	4.86	0.6	5.27	1.29	1	51	2	5	3	1	2	3	0	0	0	0
0.1	2.47	27.2	5.16	2.36	7.95	1.08	2	65	2	5	3	0	3	5	0	0	1	1
0.1	2.44	25.6	4.6	0.83	4.8	1.03	1	70	2	2	3	0	2	5	0	0	0	0
0.1	2.44	24.4	4.72	1.61	6.16	1.1	1	60	2	4	3	0	1	3	0	1	0	0
0.1	2.43	22.9	5.86	0.79	5.49	1.86	2	53	2	4	3	0	3	4	0	0	0	1
0.1	2.41	28.7	4.7	1.95	5.63	1.09	1	65	2	1	2	1	2	1	1	0	0	1
0.1	2.36	26.3	5.47	3.7	6.24	1.14	1	63	2	2	2	1	3	3	0	1	0	1
0.1	2.35	27.3	5.74	1.02	5.33	1.58	1	55	2	5	3	0	3	2	1	0	0	1
0.1	2.34	28	5.29	4.94	5.67	0.94	1	45	2	3	2	1	3	3	0	0	0	1
0.1	2.31	20.2	7.85	1.45	6.73	1.55	2	62	2	4	3	0	2	2	0	0	0	1
0.1	2.31	23.7	5.05	0.78	5.72	1.42	2	64	2	2	2	0	2	2	0	0	0	0
0.1	2.3	20.3	5.04	1.44	5.41	1.17	2	52	2	4	3	1	1	3	0	0	0	0
0.1	2.28	28.3	6.41	3.76	14.49	1.18	1	48	2	5	3	0	2	4	1	1	0	1
0.1	2.27	23.1	5.75	1.01	5.17	1.39	2	64	2	3	1	0	3	3	0	1	0	1
0.1	2.22	25.9	4.46	1.85	6.31	1.03	1	54	2	5	3	0	1	4	0	1	0	1
0.1	2.21	28.8	4.52	5.99	6.9	0.95	1	57	2	4	3	0	2	5	0	1	0	1
0.1	2.17	25	4.53	1.61	4.66	1.18	2	49	2	5	3	0	2	3	0	0	0	0
0.1	2.17	23.3	4.62	0.85	5.26	1.23	1	52	2	5	3	0	2	4	0	0	0	0
0.1	2.12	23.8	6.33	4.55	5.26	1.15	1	64	2	5	3	2	2	5	0	0	1	1
0.1	2.09	28.7	4.83	2.77	6.43	0.93	1	58	2	4	3	0	2	5	0	1	0	1
0.1	2.05	22.6	5.48	3.2	5	0.96	1	50	2	5	3	1	3	2	1	0	0	1
0.1	2.03	23.5	5.74	1.95	6.27	1.37	1	49	2	5	3	2	2	4	1	1	0	1
0.1	2	29.3	4.33	1.83	8.5	1.15	1	67	2	3	5	0	3	3	1	1	1	1
0.1	1.91	22.9	4.49	1.39	5.1	1.39	2	45	2	5	3	0	2	5	0	1	0	0
0.1	1.87	28.3	3.86	1.23	4.83	0.98	2	75	2	5	3	0	1	4	0	1	0	0
0.1	1.85	26.4	4.86	2.99	10.14	0.91	1	62	2	3	3	0	3	5	0	0	1	1
0.1	1.67	24.6	3.61	0.89	5.49	1.05	1	56	2	4	2	0	2	3	0	1	0	0
0.1	1.63	25.6	5.47	2.07	4.44	1.25	1	58	2	4	3	1	2	2	0	1	0	1
0.1	1.49	23.7	4.73	6.19	5.54	0.97	1	46	2	5	3	1	1	3	0	1	0	1
0.1	1.42	23.6	4.73	1.01	5.08	1.19	1	62	2	5	3	2	3	3	0	0	0	0
0.1	1.26	28.2	3.27	1.28	4.57	1.02	2	50	2	3	3	0	3	5	0	0	0	0
0.1	1.24	26.3	5.09	1.62	5.21	1.31	2	48	2	3	3	0	2	3	0	0	0	0
0.1	1.24	26	4.6	3.58	5.9	0.91	1	50	2	4	3	0	2	3	0	1	0	1
0.1	1.13	22.4	3.3	1.76	6.04	1.14	1	54	2	4	3	0	2	3	0	1	1	1
0.1	1.1	22.9	4.33	2.29	4.47	1.12	2	76	2	4	3	0	2	4	0	1	0	1
0.1	1.07	18.7	3.64	1.06	4.6	1.26	2	50	2	5	4	0	1	3	0	0	0	0
0.1	1.07	23.3	3.93	1.22	6.54	1.09	2	67	2	3	3	0	2	4	0	1	1	0
0.1	1.03	21.3	4.84	1.61	4.76	1.34	2	49	2	3	2	0	3	2	0	1	0	0
0.1	1	23.9	4.58	1.41	4.95	1.13	1	50	2	5	3	2	1	4	0	0	0	0
0.1	1	22.9	3.3	0.67	4.77	1.54	2	54	2	5	3	0	2	4	0	0	0	0
0.1	0.81	27	3.07	1.32	9.66	0.82	1	51	2	3	3	2	2	3	0	0	1	0
0.1	0	20.6	0	0	0	0	2	47	2	5	3	0	1	4	0	0	0	0
0.1	0	23.9	0	0	0	0	2	67	2	2	3	0	3	3	0	1	1	0
0	5.76	22.9	9.19	0.76	4.73	1.29	1	33	2	5	3	0	2	4	0	0	0	1
0	5.65	19	9.79	0.65	5.37	1.84	2	27	2	5	3	0	1	5	0	0	0	1
0	5.61	0	8.63	1.46	6.38	1.17	2	31	2	5	3	0	2	5	0	0	0	1
0	5.28	20.5	8.72	2.38	5.01	1.4	2	51	2	4	3	0	2	3	0	0	0	1
0	5.18	26.2	8.17	1.76	8.22	1.27	1	44	2	4	3	1	1	3	1	1	0	1
0	5.07	26.4	8.53	3.66	5.72	1.16	1	39	2	5	3	0	1	4	0	0	0	1
0	4.67	32	7.69	3	7.67	1.2	1	43	2	5	3	1	1	3	0	1	0	1
0	4.54	40.9	7.3	2	9.06	1.19	1	34	2	5	3	0	2	4	0	1	0	1
0	4.53	23.9	7.42	1.05	4.84	1.04	2	31	2	5	3	0	2	3	0	0	0	1
0	4.43	28	7.89	1.04	4.27	1.55	2	29	2	5	3	0	1	2	0	0	0	1
0	4.42	19.7	8.53	0.74	4.67	1.98	1	35	2	5	3	0	2	3	0	0	0	1
0	4.41	30.5	7.1	1.22	5.37	1.18	1	28	2	5	3	0	1	4	0	0	0	1
0	4.35	24.4	6.96	0.96	4.76	1.45	1	37	2	5	3	0	1	4	0	0	0	1
0	4.24	0	7.72	1.65	5.25	1.68	2	30	2	5	3	0	2	4	0	0	0	1
0	4.15	29.8	7.05	2.13	5.76	1.38	1	37	2	5	3	1	3	5	0	1	0	1
0	4.14	22.3	6.99	4.19	4.46	1.3	1	50	2	4	3	1	3	3	1	1	0	1
0	4.12	30.1	7.09	4.39	7.23	1	2	35	2	5	5	0	1	3	0	0	0	1
0	4.12	37.5	6.76	1.5	4.75	1.13	1	33	2	5	3	0	2	2	0	0	0	1
0	4.11	24.2	7.06	2.08	5.8	1.09	1	65	2	3	3	2	2	4	0	1	0	1
0	4.08	26	7.1	3.96	5.23	1.05	1	33	2	5	3	1	2	4	1	0	0	1
0	4.05	28.2	6.73	1.81	5.15	1.28	1	30	2	5	3	0	3	3	1	1	0	1
0	4.04	32.4	7.32	3.95	5.22	1.18	2	41	2	3	3	0	3	4	0	0	0	1
0	4.03	27.3	6.63	3.21	5.45	0.95	1	35	2	5	3	0	3	3	0	1	0	1
0	4.01	21.6	7.01	1.5	5.72	1.19	1	51	2	5	2	0	1	3	1	1	0	1
0	3.99	24.1	6.84	0.83	5.12	1.37	2	41	2	5	3	0	2	5	0	0	0	1
0	3.96	25.5	7.38	2.04	4.91	1.49	2	50	2	5	3	0	1	4	0	0	0	1
0	3.92	27.1	7.05	5.1	5.73	1.36	1	34	2	5	3	2	2	3	1	1	0	1
0	3.92	#NULL!	7.05	3.75	6.68	1.22	1	44	2	3	3	0	1	3	0	1	0	1
0	3.89	26.9	6.67	1.93	4.95	1.35	2	29	2	5	3	0	2	4	0	0	0	1
0	3.86	24.1	7.25	1.72	5.18	1.36	2	55	2	4	2	0	2	5	0	1	0	1
0	3.85	26.1	6.62	3.04	5.46	1.17	1	37	2	5	3	0	2	3	0	0	0	1
0	3.85	29.2	6.58	1.87	5.25	1.3	2	47	2	4	3	0	1	3	0	0	0	1
0	3.83	27.3	7.08	5.42	5.1	1.31	1	43	2	4	3	1	2	2	1	1	0	1
0	3.83	24	7.02	1.08	4.87	1.45	2	42	2	4	3	0	2	4	0	0	0	1
0	3.81	31.6	7.99	2.69	7.31	1.21	1	29	2	5	3	1	3	4	0	1	0	1
0	3.8	24.2	7.72	1.04	5.25	1.42	2	36	2	5	3	0	2	4	0	0	0	1
0	3.78	29.4	6.34	2.98	8.07	0.94	2	31	2	5	3	0	1	4	0	0	0	1
0	3.78	28.3	6.52	1.16	5.09	1.12	1	31	2	5	3	0	2	3	0	1	0	1
0	3.77	29.7	6.4	9	4.65	0.94	1	40	2	5	3	1	2	3	1	0	0	1
0	3.77	25.5	6.56	1.45	5.6	1.23	2	67	2	3	3	0	1	2	0	1	0	1
0	3.76	23.7	6.63	2.37	4.78	0.98	1	44	2	5	3	1	3	4	0	0	0	1
0	3.76	31.5	6.64	1.92	6.85	1.2	2	33	2	5	3	0	2	4	0	1	0	1
0	3.75	21.5	6.63	0.99	5.1	1.61	2	37	2	4	3	0	2	4	0	0	0	1
0	3.74	29.9	6.58	5.57	5.2	1.13	1	32	1	5	3	0	1	4	1	1	0	1
0	3.73	22	6.9	0.78	5.02	1.47	1	51	2	4	3	1	2	2	1	0	0	1
0	3.72	26.3	6.67	2.27	5.51	1.19	1	37	2	5	3	1	3	4	0	0	0	1
0	3.72	31.2	6.14	1.92	5.46	1.1	1	37	2	5	3	1	3	4	0	1	0	1
0	3.72	32.3	5.96	1.46	5.39	1.22	1	34	2	4	3	0	2	5	0	1	0	1
0	3.72	27.1	6.55	4.01	4.67	1.1	1	28	2	5	3	0	2	3	0	0	0	1
0	3.7	28.4	6.1	2.19	4.89	1.04	2	40	2	5	3	0	2	4	0	0	0	1
0	3.68	0	7.05	4.25	5.14	1.21	2	23	2	5	3	0	1	5	0	0	0	1
0	3.66	25.3	6.83	4.21	4.62	1.12	1	53	2	4	3	2	3	3	1	1	1	1
0	3.66	23.5	6.64	1.95	5.3	1.32	1	30	1	5	3	1	3	3	0	0	0	1
0	3.65	0	6.92	2.55	7.55	1.41	2	63	2	2	2	0	3	2	0	1	1	1
0	3.65	27.8	6.58	2.54	5.53	1.12	2	43	2	3	2	0	1	2	0	0	0	1
0	3.65	20.5	6.4	0.89	5.87	1.31	1	23	1	4	3	0	2	5	0	0	0	1
0	3.6	23.6	6.78	0.84	9.63	1.41	1	65	2	3	4	0	2	3	0	1	1	1
0	3.59	26.9	6.68	2.93	5.87	1.12	1	44	2	5	3	0	2	4	0	1	0	1
0	3.57	26.5	7.13	2.94	4.92	1.34	1	42	2	5	3	0	2	3	0	0	0	1
0	3.57	28.7	5.91	2.72	6.58	0.94	1	32	2	5	3	1	2	4	0	0	0	1
0	3.56	26.4	6.99	1.52	5.08	1.45	1	40	2	5	3	1	2	3	1	0	0	1
0	3.56	27.3	6.42	1.29	5.08	1.19	1	29	2	5	3	1	3	2	0	0	0	1
0	3.54	28.9	6.5	2.28	6.63	1.16	1	39	2	5	3	0	3	3	1	1	0	1
0	3.52	23.8	6.52	1.83	4.89	1.17	1	34	2	5	3	2	2	4	0	0	0	1
0	3.51	26.4	6.37	3.05	5.3	1.14	1	38	2	5	3	0	2	4	1	1	0	1
0	3.51	28.6	6.41	3.03	4.99	1.21	1	33	2	5	3	1	2	4	1	0	0	1
0	3.51	27.6	6.16	1.01	5.03	1.06	1	31	2	5	3	1	1	4	0	1	0	1
0	3.51	0	5.85	1.05	4.97	1.03	1	31	2	5	3	0	2	4	0	0	0	1
0	3.5	27.3	6.28	3.74	4.79	0.97	1	38	2	5	3	1	3	2	0	0	0	1
0	3.5	22.2	6.24	2.98	5.2	1.17	1	31	2	99	3	1	1	5	0	0	0	1
0	3.5	#NULL!	6.13	1.42	4.57	1.29	2	27	1	5	2	0	2	4	0	1	0	1
0	3.49	27.5	6.67	9.12	4.38	0.93	1	34	2	5	4	0	1	3	0	0	0	1
0	3.49	32.7	6.38	7.79	5.36	1.09	2	28	2	5	3	0	2	4	0	0	0	1
0	3.48	24.2	5.58	1.44	5.11	1.12	1	36	2	5	3	0	1	4	1	0	0	1
0	3.48	27.3	7.62	5.12	6.44	1.15	1	49	2	3	3	1	1	2	0	1	0	1
0	3.48	0	6.01	1.09	5.1	1.02	1	51	2	3	3	1	2	4	0	0	0	1
0	3.47	30.3	5.92	3.16	4.89	0.98	2	34	2	5	3	0	2	4	0	0	0	1
0	3.47	23.9	6.53	1.46	4.67	1.17	1	37	2	5	3	0	1	3	1	1	0	1
0	3.47	24.8	6.2	2.43	5.7	1.08	1	38	2	5	3	1	3	4	0	0	0	1
0	3.46	26.2	6.23	2.26	5.4	1.18	1	38	2	5	3	1	2	3	0	0	0	1
0	3.46	30.2	6.87	2.08	5.27	1.21	1	37	2	5	3	0	1	4	0	0	0	1
0	3.46	22.7	6.35	3.16	7.93	1.35	2	38	2	4	3	0	3	3	0	1	0	1
0	3.45	21.6	6.04	2.52	14.74	1.02	1	38	2	5	3	0	2	3	0	0	0	1
0	3.44	24.9	6.47	3.41	5.69	1.38	1	29	1	5	3	1	3	3	1	0	0	1
0	3.44	26.5	5.82	1.65	4.81	1.12	1	33	2	5	3	1	1	4	0	0	0	1
0	3.42	34	5.99	1.78	4.91	1.06	1	28	2	5	3	0	3	3	0	1	0	1
0	3.42	24.2	5.76	1.53	5.16	0.92	1	26	2	5	3	1	2	3	0	1	0	1
0	3.41	27.1	6.61	0.79	5.85	1.78	1	44	2	4	3	1	2	3	0	0	0	1
0	3.41	26.6	5.79	1.49	7.57	0.98	1	38	1	4	2	1	2	3	0	1	0	1
0	3.41	25.5	6.33	1.66	4.82	1.2	2	32	2	5	3	0	2	4	0	0	0	1
0	3.41	27	6.02	4.02	5.49	1.03	1	33	2	5	3	1	2	4	0	1	0	1
0	3.41	26.6	6.11	1.59	5.25	1.01	1	31	1	5	3	1	2	5	1	0	0	1
0	3.4	26.1	6.7	3.82	4.94	1.05	1	41	2	4	3	1	1	5	1	0	0	1
0	3.4	26.2	6	3.34	5.54	1.05	1	34	2	5	3	2	1	4	1	1	0	1
0	3.4	24.9	6.27	1.89	5.33	1.05	1	41	2	4	3	1	2	3	0	1	0	1
0	3.4	31.8	6.04	2.9	5.15	1.05	1	33	2	5	3	0	2	4	0	0	0	1
0	3.39	24	6.26	1.98	5.33	1.31	2	44	2	5	3	0	1	4	0	0	0	1
0	3.38	25.4	5.53	4.21	7.67	1	1	29	2	5	3	0	3	5	0	0	0	1
0	3.36	28.4	6.84	6.58	5.88	1.08	1	41	2	5	3	1	1	3	1	1	0	1
0	3.36	25.3	6.63	4.17	5.6	1.11	1	36	2	5	3	1	2	3	0	0	0	1
0	3.36	26	6.45	1.09	11.01	1.16	2	66	2	3	3	0	1	3	0	1	1	1
0	3.36	27.2	6.21	2.34	6.47	1.18	1	38	2	5	3	0	2	2	0	0	1	1
0	3.36	0	5.73	1.94	4.73	1.03	2	26	2	5	3	0	3	4	0	0	0	1
0	3.35	23.1	6.26	2.15	5.59	1.12	1	41	2	5	3	1	1	4	0	0	0	1
0	3.35	25.4	7.02	1.6	5.05	1.21	1	26	2	5	6	1	2	2	0	0	0	1
0	3.34	29.7	9.43	19.32	7.35	1.32	1	38	2	5	3	0	3	4	0	1	0	1
0	3.34	24.5	6.14	2.59	5.08	1.13	2	37	2	5	3	0	3	2	0	0	0	1
0	3.34	28.5	6.07	10.04	5.29	0.96	1	31	2	5	3	1	2	3	1	0	0	1
0	3.33	22.7	6	2.04	5.33	1.1	1	36	2	5	3	0	2	4	0	0	0	1
0	3.33	26	5.85	2.23	5.12	1.05	2	41	2	5	2	0	1	3	#NULL!	0	0	1
0	3.33	21.6	6.18	1.99	5.31	1.31	1	36	2	5	3	1	1	4	0	0	0	1
0	3.33	26.4	5.97	1.52	5.31	1.11	1	51	2	5	3	1	1	4	0	0	0	1
0	3.32	29.2	6.45	5.18	6.96	1.25	1	43	2	5	3	0	2	3	1	0	0	1
0	3.32	24.4	6.06	1.93	5.19	1.23	2	53	2	3	2	0	1	5	0	0	0	1
0	3.32	24	6.05	3.36	5.47	1.32	1	38	2	5	3	0	2	4	0	0	0	1
0	3.32	24	5.63	1.59	5.21	1.25	2	52	2	5	3	0	3	3	0	1	0	0
0	3.31	30.1	5.97	6.78	14.4	0.96	1	38	2	5	3	1	1	4	0	1	1	1
0	3.31	29.9	5.69	1.64	5.38	0.91	1	34	2	5	3	1	1	4	1	0	0	0
0	3.31	31.8	5.93	1.54	5.52	1.21	1	33	2	5	3	0	1	3	1	1	0	1
0	3.31	32	5.88	3.47	8.32	1.02	1	37	2	4	3	0	2	4	0	1	0	1
0	3.3	25.8	5.52	1.66	5.04	1.03	1	39	2	4	3	0	3	4	0	0	0	0
0	3.3	30.7	6.21	1.65	4.81	1.48	1	36	2	5	3	0	1	3	0	0	0	1
0	3.3	24.1	5.91	1.12	5.3	1.09	1	42	2	4	3	1	2	3	1	0	0	1
0	3.3	34.7	7.01	7.92	14.64	1.29	1	29	2	5	3	0	3	5	0	0	0	1
0	3.28	26.4	5.9	1.34	5.68	1.14	1	34	2	5	3	0	2	5	1	0	0	1
0	3.27	24.7	5.89	1.71	4.44	1.11	1	37	2	4	3	0	3	6	0	0	0	1
0	3.27	21	5.89	1.78	4.08	0.96	1	34	2	5	3	1	3	4	0	0	0	1
0	3.26	27.6	6.38	5.89	10.1	1.17	1	42	2	4	3	1	2	3	0	0	0	1
0	3.26	20.8	6.03	1.2	4.75	1.2	2	42	2	5	3	0	2	4	0	0	0	1
0	3.25	22.4	6.34	4.2	18.83	1.17	1	52	2	5	3	1	3	3	1	0	1	1
0	3.25	25.9	6.47	3.46	6.65	1.25	1	29	1	5	3	0	2	3	0	0	0	1
0	3.25	33.9	12.44	19.76	17.71	1.89	2	40	2	5	3	0	2	4	0	1	0	1
0	3.25	28	5.71	1.43	5.65	1.34	1	28	1	5	3	0	1	4	0	0	0	1
0	3.24	28.3	5.99	3.48	4.33	1.25	1	32	2	5	3	1	2	3	1	0	0	1
0	3.24	20.8	6.3	3.41	4.35	1.13	1	40	2	5	3	1	2	5	0	0	0	1
0	3.24	26.3	6.01	2.61	5.66	1.29	1	34	2	5	3	0	2	4	1	1	0	1
0	3.24	29.1	5.77	1.49	6.16	1.02	1	30	2	5	3	1	3	4	0	0	0	1
0	3.23	33.5	5.95	3.63	6.55	1.05	1	36	2	5	3	1	2	2	1	0	0	1
0	3.23	25.9	6.2	2.16	5.54	1.35	1	42	2	5	3	0	1	4	0	0	0	1
0	3.22	29.3	6.01	5.39	6.17	1.01	1	37	2	5	4	1	2	3	0	0	0	1
0	3.22	26.3	6.54	3.94	5.95	1.16	1	41	2	5	3	1	1	4	0	0	0	1
0	3.22	27.4	5.43	2.51	5.72	0.92	1	38	2	5	3	1	3	3	0	0	0	1
0	3.22	30.2	7.13	5.13	5.65	1.02	1	45	2	3	3	2	3	5	0	1	0	1
0	3.21	23	6	2.53	5.12	1.36	2	43	2	4	3	0	2	4	0	1	0	1
0	3.21	26.2	5.72	2.12	5.06	1.09	1	33	2	5	3	1	2	4	1	0	0	1
0	3.21	27.7	6.01	1.71	6.01	1.22	1	34	2	5	3	0	2	4	0	1	0	1
0	3.21	28.7	5.79	3.09	5.89	0.97	1	29	2	5	3	1	3	4	0	0	0	1
0	3.2	23.7	5.55	1.65	5.58	0.9	1	33	2	5	4	0	3	3	0	0	0	0
0	3.2	32.5	6.06	3.51	5.14	1.17	1	36	2	5	3	1	3	5	0	1	0	1
0	3.2	28.1	6.17	1.6	5.31	1.39	2	34	2	5	2	0	1	4	0	0	0	1
0	3.19	24.8	5.62	1.53	4.82	1.12	2	51	2	5	3	0	2	3	0	0	0	0
0	3.19	32.6	5.37	2.85	5.65	0.9	1	33	2	5	3	0	2	4	0	0	0	1
0	3.19	27.4	5.41	2.78	4.99	0.95	1	30	2	4	3	1	1	5	0	0	0	1
0	3.19	0	6.28	3.25	4.84	1.25	1	23	1	5	3	0	3	4	0	0	0	1
0	3.18	38.6	6.36	2.34	6.02	1.1	1	44	2	4	3	1	2	3	0	1	0	1
0	3.18	24.9	6.57	1.99	5.06	1.03	1	30	2	4	2	1	3	3	1	0	0	1
0	3.18	22.1	6.26	1.32	4.74	1.83	2	38	2	5	3	0	2	2	0	0	0	1
0	3.18	31.3	6	1.37	4.94	1.38	2	39	2	4	2	0	1	5	0	0	0	1
0	3.18	30.3	5.89	4.33	4.85	1.05	1	38	2	5	3	0	2	4	0	0	0	1
0	3.18	26.9	6.29	2.56	5.55	1.25	1	30	1	4	3	1	2	5	1	1	0	1
0	3.18	27.3	5.3	1.49	5.07	0.8	1	23	1	5	3	1	2	5	0	0	0	0
0	3.18	27.9	6.06	7.53	5.28	1.07	2	26	1	5	3	0	1	4	0	0	0	1
0	3.17	26.6	6.45	1.91	10.07	1.07	2	36	2	3	3	1	2	4	0	0	1	1
0	3.17	0	5.52	1.97	4.84	1.08	1	35	2	5	3	0	1	5	0	0	0	1
0	3.17	27.3	5.93	1.97	5.39	1.11	1	42	2	5	3	1	2	4	0	0	0	1
0	3.16	28.6	5.95	2.61	7.52	1.01	1	46	2	4	3	1	3	4	0	1	0	1
0	3.16	22.6	6.54	1.86	5.13	1.15	1	44	2	5	3	1	3	3	0	0	0	1
0	3.16	26.7	5.81	1.67	6.16	1.13	1	37	2	5	3	0	2	4	0	0	0	1
0	3.16	25.6	5.24	1.55	8.56	1	1	43	2	5	3	1	3	3	0	0	0	0
0	3.16	21.9	5.8	1.02	4.94	1.25	1	33	2	5	3	0	1	3	0	1	0	1
0	3.16	22.1	5.84	3.24	5.81	0.94	1	32	2	4	3	0	3	5	0	1	0	1
0	3.15	24.5	5.81	3.03	4.82	1.1	1	33	2	5	4	1	1	4	1	0	0	1
0	3.15	25.2	5.32	1.13	5.91	1.44	2	66	2	3	3	0	1	4	0	1	0	0
0	3.15	25.2	6.14	3.32	5.5	1.1	1	40	2	5	3	0	2	3	0	0	0	1
0	3.15	24.5	5.75	2.42	6.14	1.26	2	39	2	4	3	0	3	3	0	0	0	1
0	3.15	20.4	5.93	1.48	4.99	1.55	2	28	2	5	3	0	2	4	0	0	0	1
0	3.14	31.9	5.79	1.93	4.71	1.06	2	36	2	5	3	0	2	3	0	0	0	1
0	3.14	26.1	6.2	1.17	5.6	1.14	1	52	2	3	3	1	2	4	1	0	0	1
0	3.13	28.1	5.64	2.5	5.19	1.04	1	34	2	5	3	1	3	4	1	1	0	1
0	3.13	24.9	5.59	1.78	5.18	1.07	1	49	2	3	2	1	1	4	0	0	0	1
0	3.13	24.5	5.68	1.3	4.72	1.24	1	32	2	5	3	0	2	5	0	0	0	0
0	3.13	19	6.62	0.68	5.51	2.08	2	29	1	5	3	0	2	4	0	0	0	1
0	3.13	29	5.87	1.75	4.98	1.13	1	31	2	5	3	1	2	3	0	0	0	1
0	3.13	27.5	5.12	1.46	8.54	1.09	1	65	2	4	3	2	3	3	0	1	1	0
0	3.13	0	5.89	1.86	4.29	1.17	1	33	2	4	3	1	3	4	0	1	0	1
0	3.12	24.9	5.68	1.53	4.76	1.14	1	34	2	4	3	1	3	4	0	0	0	0
0	3.12	28.6	6.08	11.48	5.34	0.95	1	44	2	4	3	1	3	3	0	0	0	1
0	3.12	24.8	5.72	2.66	5.23	1.16	1	43	2	5	3	1	3	4	1	0	0	1
0	3.12	30.7	5.98	8.23	5.28	1.12	1	37	2	5	3	1	2	4	0	1	0	1
0	3.12	25	5.49	1.26	5.07	1.07	1	36	2	5	3	1	3	3	1	0	0	0
0	3.11	31.1	6.46	5.64	5.18	1.1	1	37	2	5	3	1	2	3	1	0	0	1
0	3.11	28.2	5.71	5.83	4.96	0.88	1	40	2	5	3	1	3	3	0	0	0	1
0	3.11	25.8	5.6	1	5.21	1.43	1	31	1	5	3	0	1	3	0	1	0	0
0	3.11	25.5	5.82	2.06	6.18	1.14	1	33	2	5	3	1	2	3	1	0	0	1
0	3.11	28.9	5.38	1.78	4.4	0.94	1	27	2	3	3	1	2	3	0	0	0	1
0	3.11	26.1	5.67	3.17	5.3	1.05	2	33	2	5	3	0	1	3	0	0	0	1
0	3.1	32.4	5.51	2.79	5.14	0.92	1	35	2	5	3	0	1	4	0	1	0	1
0	3.1	25.4	5.19	3.44	4.74	1.07	2	38	2	5	3	0	2	4	0	0	0	1
0	3.1	25.8	5.84	2.11	5.34	1.23	2	33	2	5	3	0	3	4	0	0	0	1
0	3.1	32.3	7.68	10.21	5	1.24	1	41	2	3	3	1	2	3	0	0	0	1
0	3.1	30.4	5.54	3.77	11.44	1	1	32	2	5	3	1	3	3	0	0	0	1
0	3.1	33.5	5.49	1.34	5.36	1.09	1	24	1	4	3	0	2	4	0	1	0	0
0	3.09	21.3	6.28	1.24	5.2	1.88	2	32	2	5	3	0	2	4	0	0	0	1
0	3.09	25.1	6.43	2.17	4.7	1.01	1	55	2	3	2	0	3	4	1	1	0	1
0	3.08	21.2	5.61	1.41	4.84	1.2	2	43	2	5	3	0	3	4	#NULL!	0	0	0
0	3.08	30.2	6.59	2.78	5.51	1.11	1	41	2	5	3	0	2	5	1	0	0	1
0	3.08	21.2	5.76	0.86	5.31	1.51	2	42	2	5	3	0	2	5	0	0	0	1
0	3.08	26.2	7.15	0.82	4.8	1.94	2	41	2	4	3	0	2	4	0	0	0	1
0	3.08	28	5.57	2.21	5.3	1.02	1	36	2	5	3	0	3	4	0	0	0	1
0	3.08	27.3	5.12	2.96	5.34	0.82	1	38	2	5	3	0	1	4	0	1	0	1
0	3.08	22.7	5.8	2.31	5.92	1.38	1	30	2	5	3	1	1	4	0	0	0	1
0	3.07	30.5	5.63	1.77	5.21	1.2	2	40	2	5	3	0	3	4	0	0	0	1
0	3.07	24.9	6.09	2.78	5.32	1.29	1	39	2	5	3	1	3	4	0	0	0	1
0	3.07	22.3	6.05	0.99	5.01	1.04	2	32	2	5	2	0	2	4	0	0	0	1
0	3.07	22.3	6.05	0.99	5.01	1.04	2	32	2	5	2	0	2	4	0	0	0	1
0	3.07	23.8	7.27	5.33	6.23	1.32	1	51	2	3	3	1	3	5	1	1	0	1
0	3.06	32.8	5.56	1.49	4.98	1.09	1	34	2	5	3	1	1	4	1	0	0	0
0	3.06	26.8	6.52	1.06	5	1.17	1	36	2	5	3	1	2	4	1	0	0	1
0	3.06	28	5.29	1.32	5.81	0.85	1	28	2	5	3	1	3	4	0	0	0	0
0	3.06	0	5.28	1.06	6.98	1	1	57	2	5	3	1	2	4	0	0	0	0
0	3.05	26.6	6.42	5.71	5.09	1.13	1	32	2	5	3	0	1	4	0	1	0	1
0	3.05	29.3	5.52	1.64	5.46	0.89	1	33	2	4	3	0	1	5	0	1	0	0
0	3.05	0	5.87	3.5	5.3	1.21	1	42	2	3	3	0	2	3	0	0	0	1
0	3.04	30.2	5.51	1.39	4.66	0.97	1	37	2	5	3	1	2	4	0	1	0	0
0	3.04	22.6	6.46	4.35	4.4	1.11	2	39	2	5	3	0	2	4	0	0	0	1
0	3.04	29.9	6.39	0.95	5.74	1.15	1	37	2	5	3	1	3	4	0	1	0	1
0	3.04	25.2	5.31	1.34	5.14	0.93	2	28	2	4	3	0	2	4	0	0	0	0
0	3.04	23.6	5.74	1.97	4.74	1.11	1	28	2	5	3	0	2	4	0	0	0	1
0	3.04	26.2	5.21	2.52	6.18	0.89	1	37	2	4	3	1	2	6	0	0	0	1
0	3.04	24	5.99	1.29	4.98	1.12	2	33	1	5	3	0	2	4	0	0	0	1
0	3.03	24.3	6.17	1.97	4.97	1.09	1	39	2	5	3	1	2	3	0	1	0	1
0	3.03	36.1	5.7	0.98	5.27	1.31	1	34	2	5	5	1	1	3	1	1	0	1
0	3.03	25.5	5.65	2.23	5.07	0.95	2	42	2	4	3	0	1	4	0	0	0	1
0	3.03	25.5	5.65	2.23	5.07	0.95	2	42	2	4	3	0	1	4	0	0	0	1
0	3.03	23	5.57	1.75	5.01	1.13	1	33	2	5	3	1	3	3	0	0	0	1
0	3.03	25.5	5.73	3.4	6.9	1.12	1	49	2	5	3	1	2	4	1	1	0	1
0	3.03	27.3	5.87	3.14	5.11	0.96	1	32	2	5	3	1	3	3	0	1	0	1
0	3.03	21.9	6.53	2.12	5.51	1.48	2	56	2	3	2	0	3	3	0	0	0	1
0	3.03	24.8	5.54	1.24	6.32	1.08	1	33	2	5	3	0	3	2	1	1	0	0
0	3.02	26.7	5.63	4.1	5.42	0.93	1	38	2	5	3	1	3	2	0	0	0	1
0	3.02	22.7	5.91	1.07	6.18	1.51	2	40	2	5	3	0	1	2	0	0	0	1
0	3.02	23.1	5.91	1.46	5.45	1.37	1	49	2	5	3	1	2	2	1	0	0	1
0	3.02	0	6.99	2.35	5.55	1.46	2	41	2	5	3	0	1	3	0	0	0	1
0	3.02	22.1	6.12	2.07	4.67	1.15	2	64	2	4	2	0	2	2	0	0	0	1
0	3.02	20.7	5.77	2.14	6.69	1.17	1	34	2	5	3	1	3	3	1	1	0	1
0	3.02	0	8.32	4.09	5.42	1.22	1	29	1	5	3	1	3	3	1	0	0	1
0	3.02	26.1	5.77	1.23	4.87	1.26	2	31	2	4	3	0	2	4	0	0	0	1
0	3.02	19.7	5.63	0.9	5	1.2	2	42	2	3	2	0	1	3	0	0	0	0
0	3.01	26.2	6.07	1.21	4.8	1.46	2	39	2	4	3	0	2	3	0	0	0	1
0	3.01	23.9	6.82	10.05	6.33	1.21	1	60	2	4	3	1	3	4	1	0	0	1
0	3.01	26.7	5.59	2.19	5.25	1.08	1	37	2	5	3	1	3	3	0	0	0	1
0	3.01	23.8	5.67	1.05	5.22	1.4	2	28	2	5	3	0	1	4	0	0	0	0
0	3.01	31	5.45	2.31	4.74	0.94	1	34	5	5	3	1	1	2	0	0	0	1
0	3.01	58.3	5.2	1.45	5.86	0.83	2	26	2	4	3	1	1	3	0	0	0	0
0	3	24.9	5.84	1.56	6	1.48	2	53	2	3	2	0	3	4	0	0	0	1
0	3	#NULL!	6.34	2.48	5.89	1.23	2	33	1	5	3	0	3	3	0	1	0	1
0	3	24.5	5.31	2.1	5.27	0.86	1	42	2	5	3	1	1	3	0	0	0	1
0	3	29.1	5.86	1.44	10.41	1.46	1	32	2	5	3	0	1	4	0	0	0	1
0	2.99	24.1	5.86	1.55	5.24	1.22	1	56	2	4	3	1	2	3	0	0	0	1
0	2.99	0	5.61	1.85	9	1.07	1	36	2	3	3	0	1	5	0	0	0	1
0	2.99	23.3	7.51	1.65	9.18	1.33	1	37	2	5	3	0	1	4	1	0	0	1
0	2.99	21.9	6.11	2.48	5.62	1.4	1	37	2	5	3	1	3	4	0	0	0	1
0	2.99	25.7	5.28	1.85	5.47	0.93	1	33	2	5	3	1	3	3	0	0	0	1
0	2.99	21.8	5.94	0.87	4.95	1.28	1	33	2	5	3	0	3	3	0	0	0	1
0	2.99	29.5	5.67	2.41	4.81	1.05	1	27	2	5	3	0	2	3	0	0	0	1
0	2.99	25.3	5.33	1.25	4.95	1.17	1	24	1	5	3	0	2	4	0	0	0	0
0	2.98	27.8	5.87	2.25	6.27	1.36	2	56	2	5	3	0	2	4	1	0	0	1
0	2.98	27.9	5.47	1.7	4.53	1.17	1	37	2	5	3	0	2	5	0	0	0	1
0	2.98	28.1	5.22	2.05	5.05	0.81	1	37	2	5	3	0	2	4	0	0	0	1
0	2.98	24.9	5.35	2.68	5.01	0.89	2	37	2	5	3	0	2	4	0	0	0	1
0	2.98	25.4	5.62	0.95	5.53	1.24	2	41	2	5	3	0	2	4	0	0	0	0
0	2.98	29.4	5.33	2.85	4.64	0.96	1	27	1	5	3	0	1	4	0	0	0	1
0	2.97	22.3	5.36	2.42	4.56	0.99	1	32	2	5	3	1	2	4	0	0	0	1
0	2.97	24	5.35	1.11	5.78	1.02	1	36	2	5	3	0	2	5	0	0	0	0
0	2.97	25.9	5.92	1.21	5.21	1.01	1	44	2	5	3	1	2	3	0	1	0	1
0	2.97	23.1	5.09	0.98	4.81	0.83	1	24	1	5	3	1	2	5	0	0	0	0
0	2.97	36.2	6.06	1.03	7.87	1.44	2	52	2	3	3	0	2	2	0	1	1	1
0	2.96	27.5	6.25	1.4	6.29	1.36	1	44	2	4	3	1	2	3	0	1	0	1
0	2.96	29.9	5.64	3.16	5	0.98	1	37	2	5	3	1	1	4	0	1	0	1
0	2.96	25.3	5.43	1.5	4.64	1.16	1	42	2	5	3	0	1	4	0	1	0	0
0	2.96	29.6	5.4	3.76	5.48	1.04	1	36	2	5	2	0	1	3	0	1	0	1
0	2.96	27.1	5.1	6.47	9.54	1.09	1	36	2	5	4	1	3	3	0	1	0	1
0	2.95	24.5	5.6	1.93	5.54	1.04	1	51	2	5	2	0	2	3	0	1	0	1
0	2.95	29.9	5.98	1.78	5.43	1.16	1	41	2	5	3	2	1	4	0	0	0	1
0	2.95	22.2	5.57	1.19	5.38	1.29	1	72	2	2	2	1	3	4	1	0	0	0
0	2.95	31.5	5.75	5.85	5.22	1.05	1	28	2	5	3	0	2	5	0	1	0	1
0	2.94	0	5.69	1.33	4.94	1.08	1	34	2	5	3	0	2	4	0	0	0	0
0	2.94	19.7	6.52	1.02	5.54	1.34	2	49	2	4	3	0	2	5	0	0	0	1
0	2.94	26.3	5.56	1.76	6.03	1.36	1	55	2	4	3	0	3	4	1	1	0	1
0	2.94	26.7	5.71	5.35	5.5	1.08	1	42	2	5	3	1	3	3	1	1	0	1
0	2.94	25.2	5.23	2.61	8.69	1	1	39	2	4	3	1	2	3	1	0	0	1
0	2.94	32	5.41	3.11	6.81	0.96	1	33	2	4	3	1	2	4	1	1	0	1
0	2.94	24.5	5.81	1.72	6.35	1.3	1	32	2	5	3	2	2	5	1	0	0	1
0	2.94	37.4	5.18	2.41	4.71	0.94	1	32	1	5	3	0	3	4	0	1	0	1
0	2.94	25.7	5.19	5.93	5.56	1	1	48	2	4	3	0	1	4	1	1	0	1
0	2.94	25.4	5.77	1.24	4.66	1.26	2	28	2	5	3	0	1	1	0	0	0	1
0	2.93	23.2	6.68	3.2	7.02	1.32	2	38	2	5	3	0	2	3	0	1	0	1
0	2.93	22.7	5.47	1.89	5.32	1.16	1	65	2	3	3	1	3	5	0	1	0	1
0	2.93	24.9	5.68	1.58	5.03	1.16	2	28	2	5	3	0	3	2	0	0	0	0
0	2.93	25	5.45	1.75	4.58	1.13	2	34	2	5	3	0	2	5	0	0	0	1
0	2.93	0	5.09	2.26	6.41	0.84	1	35	2	4	3	1	2	3	0	0	0	1
0	2.92	22	5.63	1.16	5.56	1.32	2	37	2	4	3	0	3	4	0	1	0	0
0	2.92	22.9	5.52	1.07	4.44	1.23	2	59	2	5	3	0	3	2	0	0	0	0
0	2.92	20.6	4.89	0.96	5.09	1.21	2	31	2	5	3	0	2	5	0	0	0	0
0	2.92	30.8	5.31	1.1	4.56	1.03	1	28	2	5	3	2	3	5	0	1	0	0
0	2.92	0	5.94	3.86	5.11	1.09	1	20	1	5	3	1	1	5	1	1	0	1
0	2.91	26.9	5.26	2.93	5.34	0.88	1	33	2	5	3	1	1	4	0	0	0	1
0	2.91	26.9	5.6	1.1	5.05	1.13	1	42	2	5	2	0	1	3	0	1	0	0
0	2.91	26.9	5.07	1	5.52	0.99	1	36	2	5	3	1	2	4	1	0	0	0
0	2.91	27.3	6.11	1.45	5.15	1.25	1	38	2	5	3	0	3	5	0	1	0	1
0	2.91	34.5	5.81	2.3	5.83	1.13	1	30	2	5	3	0	1	3	1	0	0	1
0	2.91	17.7	5.7	0.65	5.19	1.74	2	26	1	5	3	0	1	3	0	0	0	1
0	2.9	21.5	5.41	1.49	5.17	1.14	1	34	2	5	2	0	2	3	0	0	0	0
0	2.9	25.5	7.04	5.85	5.37	1.2	1	39	2	5	3	2	2	3	1	0	0	1
0	2.9	27.1	5.35	2.11	4.98	0.97	2	37	2	5	3	0	2	3	0	0	0	1
0	2.9	34.2	5.61	2.81	5.49	1.01	1	28	2	5	3	0	3	3	0	1	0	1
0	2.89	24.9	5.98	2.13	5.56	1.21	1	42	2	5	3	1	2	3	1	0	0	1
0	2.89	18.4	5.16	1.17	4.85	1.25	2	34	2	5	3	0	2	5	0	0	0	0
0	2.89	20.3	5.6	0.66	5.5	1.48	2	41	2	5	3	0	2	4	0	0	0	0
0	2.89	20.3	5.52	1.15	5.13	1.42	2	35	2	5	3	0	1	5	0	0	0	0
0	2.89	27.4	5.61	2.25	5.03	1.09	1	35	2	5	3	1	3	3	0	0	0	1
0	2.89	30.5	7.68	2.62	4.94	2.03	1	36	2	5	3	0	1	4	0	0	0	1
0	2.89	0	5.39	1.14	4.56	1.12	1	43	2	5	3	0	3	3	0	0	0	0
0	2.89	24.1	5.22	1.49	4.73	1.06	1	31	2	5	3	0	3	4	1	0	0	0
0	2.89	18.8	5.63	0.83	4.87	1.61	2	35	2	5	3	0	1	4	0	0	0	0
0	2.89	0	6.04	4.27	5.1	0.95	1	35	2	3	3	1	1	4	0	0	0	1
0	2.88	25	4.87	1.74	5.07	1.03	2	48	2	4	3	0	3	4	0	0	0	1
0	2.88	31.3	6.85	2.86	4.78	1.07	1	34	2	5	3	0	2	3	0	0	0	1
0	2.88	21.8	5.03	1.71	5.49	0.85	1	74	2	3	3	1	2	3	0	1	0	1
0	2.88	38.2	4.53	1.73	6.02	0.77	2	28	2	4	3	0	2	4	0	1	0	1
0	2.88	26	5.44	1.81	7.02	1.21	1	36	2	5	3	0	3	5	0	0	0	1
0	2.88	24.7	5.31	1.32	5.46	1.09	1	42	2	5	3	1	3	4	0	0	0	0
0	2.88	#NULL!	5.59	1.07	5.59	1.35	2	41	2	5	3	0	1	5	0	1	0	0
0	2.88	22.8	5.82	1.03	5.24	1.58	2	30	1	5	3	0	2	4	0	0	0	1
0	2.88	23	6.95	1.53	5.11	1.34	1	28	2	5	3	0	2	4	1	0	0	1
0	2.88	0	6.17	4.18	6.73	1.14	1	49	2	3	3	1	3	4	0	0	0	1
0	2.87	25.6	5.64	1.01	5.11	1.57	1	39	2	5	3	0	3	3	0	0	0	0
0	2.87	0	6.32	1.17	5.65	1.42	2	32	2	5	3	0	2	2	0	0	0	1
0	2.87	0	5.7	1.52	5.3	1.26	2	38	2	5	3	0	2	4	0	0	0	1
0	2.87	24.2	5.09	3.06	5.59	0.89	1	33	2	5	3	1	2	4	0	0	0	1
0	2.87	20.3	6.03	0.88	4.84	1.78	2	37	2	5	3	0	3	4	0	0	0	1
0	2.87	20.8	5.02	1.55	5.25	1.31	1	38	2	3	2	1	2	4	1	0	0	0
0	2.87	0	5.4	1.59	5.28	0.97	1	38	2	3	3	1	1	4	0	0	0	0
0	2.86	#NULL!	5.52	1.08	4.54	1.18	2	42	2	5	3	0	1	4	0	1	1	0
0	2.86	32.4	4.91	2.71	5.44	0.74	1	36	2	3	3	0	1	4	0	1	0	1
0	2.86	29.1	5.14	1.13	5.17	0.81	1	43	2	5	3	1	2	4	1	0	0	0
0	2.86	29.3	5.46	5.38	5.29	0.91	2	40	2	5	3	0	3	4	0	1	0	1
0	2.86	23	5.59	1.6	4.59	1.32	1	41	2	5	3	1	2	3	1	1	0	0
0	2.86	22.5	5.35	1.31	5.1	1.26	1	35	2	5	3	0	1	4	0	0	0	0
0	2.86	22.3	5.9	1.46	5.52	1.81	2	50	2	5	3	0	2	4	0	0	0	1
0	2.86	28.5	4.64	2.19	4.91	0.9	1	66	2	3	2	1	2	3	1	0	0	1
0	2.86	0	4.95	1.15	5.85	0.92	2	32	2	5	3	0	2	4	0	0	0	0
0	2.85	30.9	5.28	1.69	5.83	0.93	1	35	2	5	3	0	3	3	0	0	1	0
0	2.85	24.3	5.74	1.24	5.06	1.43	2	55	2	3	3	0	2	3	0	1	0	1
0	2.85	26.5	5.16	3.17	5.14	0.9	1	34	2	5	3	1	3	4	1	0	0	1
0	2.85	24.5	7.34	11.87	10.18	1.25	1	35	2	5	3	0	3	2	0	0	0	1
0	2.85	28	5.97	3.79	5.87	1.04	1	68	2	3	4	1	3	2	0	0	0	1
0	2.85	25.4	5.62	1.75	4.93	0.99	1	32	2	5	4	1	1	3	0	0	0	1
0	2.85	24.6	5.29	1.36	5.16	1.21	1	37	2	5	3	0	1	4	1	0	0	0
0	2.85	26.1	5.92	2.11	5.39	1.22	1	40	2	5	3	1	2	4	1	0	0	1
0	2.84	27.1	5.32	1.21	5.28	1.25	1	37	2	5	3	1	2	4	1	0	0	0
0	2.84	23.9	6.59	1.62	5.16	1.22	2	55	2	5	3	0	1	4	0	0	0	1
0	2.83	20.6	6.63	1.22	5.26	1.35	2	41	2	5	3	0	3	4	0	0	0	1
0	2.83	28.4	5.7	1.64	5.09	1.26	1	42	2	5	3	1	2	4	0	0	0	1
0	2.83	30.7	5.51	1.26	7.13	0.91	1	44	2	5	3	0	1	4	0	1	0	0
0	2.83	27.1	6.92	1.9	6.15	1.44	2	49	2	3	3	0	1	3	0	0	0	1
0	2.83	19	6.06	1.58	5.54	1.56	2	34	2	5	3	0	2	4	0	0	0	1
0	2.83	19	6.06	1.58	5.54	1.56	2	34	2	5	3	0	2	4	0	0	0	1
0	2.83	28.1	5.19	2.4	13.76	0.94	1	34	2	5	3	0	3	3	1	0	0	1
0	2.83	27.1	4.76	2.77	5.16	0.99	1	38	2	5	3	0	1	4	1	1	0	1
0	2.83	26.6	5.41	2.15	5.14	1.1	1	73	2	2	3	1	2	3	0	0	0	1
0	2.83	0	5.23	3.81	7.78	1.02	1	63	2	4	3	0	1	4	0	0	0	1
0	2.83	25.2	5.32	1.34	5.19	1.03	1	50	2	5	3	0	1	3	0	1	0	0
0	2.83	28.7	6.86	1.61	5.43	1.03	1	31	2	5	3	1	3	4	0	0	0	1
0	2.83	23.5	5.87	2	5.12	1.34	2	64	2	5	3	0	2	4	0	0	0	1
0	2.83	21.4	6.27	1.4	4.56	1.29	2	27	2	5	3	0	1	4	0	0	0	1
0	2.83	22.8	5.71	1.96	5.55	1.37	2	29	1	5	3	0	2	4	0	0	0	1
0	2.82	22.6	5.56	0.67	4.99	1.26	2	35	2	5	3	0	2	4	0	0	0	0
0	2.82	32.9	4.87	1.54	6	0.92	1	36	2	5	3	0	3	4	0	1	0	0
0	2.82	25	5.48	1.73	4.75	1.17	2	36	2	5	3	0	2	4	0	0	0	1
0	2.82	28	5.63	0.85	4.41	1.09	1	36	2	5	3	0	1	4	0	1	0	0
0	2.82	34.1	5.42	2.49	5.18	0.97	1	36	2	5	3	0	2	2	0	0	0	1
0	2.82	30.6	5.35	4.21	5.69	0.88	1	32	2	5	3	1	1	3	0	0	0	1
0	2.82	0	5.41	1.39	5.24	1.24	1	33	2	4	3	0	1	5	0	1	0	0
0	2.81	24.3	5.15	1.48	4.68	0.87	1	29	2	5	3	0	2	3	0	0	0	0
0	2.81	30.7	4.6	2.22	5.48	0.89	1	37	2	5	3	1	3	2	0	1	0	1
0	2.81	21.2	5.2	0.6	4.95	1.8	2	43	2	5	3	0	3	5	0	0	0	0
0	2.81	22.4	5.28	1.49	4.73	0.96	1	44	2	5	3	0	3	3	0	1	0	0
0	2.81	22.3	5.4	1.22	5.25	1.34	2	44	2	4	3	0	2	3	0	0	0	0
0	2.8	25.7	5.24	2.33	5	0.95	1	38	2	4	3	0	2	4	0	0	0	1
0	2.8	27.8	5.52	2.91	5.01	1.21	1	40	2	5	3	1	2	2	1	1	0	1
0	2.8	24.3	6.04	1.43	4.68	1.33	1	34	2	5	3	1	2	4	1	0	0	1
0	2.8	25.4	5.34	1.68	5.49	1.32	1	32	2	5	2	0	2	4	1	1	0	0
0	2.8	22.6	5.31	3.68	5.21	1.05	2	29	2	4	3	0	2	5	0	0	0	1
0	2.8	22.9	5.25	1.82	6.1	1.05	1	29	1	5	3	0	2	4	0	0	0	1
0	2.8	22.9	6.08	1.3	4.86	1.45	1	31	2	5	3	0	3	4	1	0	0	1
0	2.8	23.9	5.39	1.82	5.14	1.23	2	30	2	5	3	0	1	3	0	0	0	1
0	2.79	20.5	5.63	0.92	4.64	1.43	1	47	2	5	3	0	2	5	0	0	0	0
0	2.79	25.7	5.32	1.54	5.2	1	1	34	2	5	3	0	2	4	0	1	0	0
0	2.79	25.9	5.29	0.61	5.18	1.2	1	33	2	5	3	1	1	4	1	0	0	0
0	2.79	24.2	6.48	1.48	4.71	1.85	2	40	2	5	3	0	2	3	0	0	0	1
0	2.79	23.9	5.25	2.64	5.67	1	1	36	2	5	3	1	2	3	0	0	0	1
0	2.79	26.2	5.47	1.96	4.92	1.12	2	41	2	5	3	0	1	4	0	0	0	1
0	2.79	24.8	5.82	1.36	5.25	1.38	1	37	2	5	3	0	2	4	0	1	0	1
0	2.79	37.7	6.15	2.06	4.79	1.11	1	33	2	5	3	1	2	3	1	0	0	1
0	2.79	24	5.3	1.92	4.98	1.13	1	27	2	5	3	2	2	4	0	0	0	1
0	2.78	28.3	5.87	3.22	5.56	1.4	1	35	2	5	4	1	1	4	1	1	0	1
0	2.78	22.5	5.42	1.39	5.03	0.98	1	34	2	5	3	1	3	3	0	0	0	0
0	2.78	29.2	4.92	1.87	4.55	0.89	1	37	2	4	3	1	2	4	0	1	0	1
0	2.78	25.1	5.59	1.88	4.76	1.06	2	63	2	3	3	0	3	3	0	1	0	1
0	2.78	27.3	6.07	3.73	4.84	1.1	1	32	2	5	3	0	2	3	0	0	0	1
0	2.78	23.3	4.86	1.17	5.92	0.91	1	32	2	5	3	0	2	3	0	0	0	0
0	2.77	26.2	4.96	2.68	5.05	0.79	1	37	2	4	3	1	3	3	1	0	0	1
0	2.77	23.3	5.06	1.51	4.67	1.05	1	31	2	5	3	1	2	4	0	1	0	0
0	2.77	20.6	5.23	1.13	5.24	1.08	2	40	2	5	3	0	2	2	0	0	0	0
0	2.77	21.3	5.76	1.3	4.2	1.31	2	40	2	5	3	0	3	3	0	0	0	1
0	2.77	21.3	5.76	1.3	4.2	1.31	2	40	2	5	3	0	3	3	0	0	0	1
0	2.77	25.7	5.24	1.81	4.91	1.13	2	33	2	5	3	0	2	3	0	0	0	1
0	2.77	21.3	5.4	2.28	5.19	1.15	2	33	2	5	3	0	2	4	1	0	0	1
0	2.77	34.3	6.56	2.09	5.38	1.25	1	41	2	5	3	0	3	4	1	1	0	1
0	2.77	19.6	6.36	0.57	4.79	2.26	2	32	2	5	3	0	2	4	0	0	0	1
0	2.77	22.6	5.51	1.1	4.68	1.22	1	36	2	5	3	0	2	3	0	0	0	0
0	2.77	22.4	5.16	2.02	5.54	0.93	1	31	2	5	3	0	1	3	0	1	0	1
0	2.77	26.9	5.58	1.65	5.02	1.29	2	26	2	5	3	0	2	5	0	0	0	0
0	2.76	26.1	6.27	1.51	5.41	1.32	1	35	2	5	3	0	2	4	1	0	0	1
0	2.76	22.8	5.62	1.16	4.71	1.34	1	34	2	5	3	0	1	5	0	0	0	0
0	2.76	27.4	5.67	6.48	5.11	1.02	1	33	2	5	3	0	2	4	1	0	0	1
0	2.76	23.3	5.22	1.54	5.77	1.08	2	41	2	5	3	0	1	3	0	0	0	0
0	2.76	23.8	5.35	0.85	5.08	1.34	2	44	2	5	3	0	1	5	0	0	0	0
0	2.76	25.2	5.53	3.15	4.95	1.04	1	34	2	5	3	0	2	5	0	0	0	1
0	2.76	17.5	4.9	0.54	4.64	1.42	2	33	2	5	3	0	3	4	0	0	0	0
0	2.76	26.3	5.35	1.26	5.31	1.44	2	37	2	4	3	0	2	3	0	0	0	0
0	2.76	0	5.82	0.72	5.16	1.34	2	33	2	5	3	0	2	3	0	0	0	1
0	2.75	24.8	5.24	2.16	5.42	1.06	1	39	2	5	3	0	1	4	0	0	0	1
0	2.75	31.8	5.4	1.01	4.75	1.36	2	38	2	5	3	0	1	4	0	0	0	0
0	2.75	20.7	5.04	1.7	5.18	0.99	2	30	2	5	3	0	3	4	0	0	0	1
0	2.75	27.5	4.85	1.82	5.11	0.89	2	34	2	5	3	0	2	4	0	0	0	1
0	2.75	28	4.92	2.98	5.66	1.08	1	48	2	3	2	0	3	4	1	0	0	1
0	2.75	0	5.28	1.31	5.42	1.06	1	52	2	3	2	1	1	4	0	0	0	0
0	2.74	22.9	5.44	1.09	5.25	1.54	2	39	2	5	3	0	1	4	0	0	0	0
0	2.74	23.3	5.49	1.39	5.37	1.35	1	36	2	5	3	1	3	3	1	0	0	0
0	2.74	26.7	5.11	3.18	5.29	0.96	2	37	2	5	3	0	2	4	0	0	0	1
0	2.74	0	5.05	1.97	4.72	1	2	35	2	5	3	0	2	4	0	0	0	1
0	2.74	20.5	5	0.88	5.23	1.14	1	37	2	5	3	1	3	5	0	0	0	0
0	2.74	24.3	5.66	2.2	5.6	0.96	1	35	2	5	3	0	2	4	0	0	0	1
0	2.74	27.4	6.1	2.56	5.62	1.02	1	29	2	4	3	0	2	5	0	0	0	1
0	2.73	21.7	6.1	2.65	5.14	1.17	1	34	2	5	3	1	3	3	1	0	0	1
0	2.73	27.3	5.77	4.27	5.37	1.14	1	56	2	5	3	0	2	3	1	1	0	1
0	2.73	29.8	6.79	4.17	4.99	1.2	1	37	2	5	3	0	2	4	1	0	0	1
0	2.73	0	5.31	3.03	4.71	1.07	2	32	2	5	3	0	1	4	1	1	0	1
0	2.73	26.2	7.65	10.17	5.13	1.25	1	37	2	5	3	0	2	4	0	0	0	1
0	2.73	23.1	5.97	6.4	5.16	1.05	1	38	2	5	3	1	1	3	0	0	0	1
0	2.73	27.6	5.42	3.81	5.55	1.02	1	33	2	5	3	1	1	3	0	1	0	1
0	2.73	25.3	6.12	1.46	4.81	0.95	1	33	2	5	3	1	1	2	1	0	0	1
0	2.73	27.4	5	3.79	4.8	0.8	1	30	2	5	3	1	2	2	0	0	0	1
0	2.73	20.3	5.38	0.74	5.12	1.29	2	35	2	5	2	0	2	4	0	0	0	0
0	2.73	30.5	4.92	4.64	7.3	0.85	1	44	2	5	3	1	3	4	0	0	0	1
0	2.72	27	5.41	1.02	6.22	1.4	1	59	2	5	3	0	2	3	0	0	0	0
0	2.72	24	5.17	1.55	4.97	1.2	1	44	2	5	3	0	1	4	0	0	0	0
0	2.72	26.5	4.86	2.18	5.02	1	2	40	2	5	3	0	1	4	0	0	0	1
0	2.72	25.9	5.11	1.1	6.15	1	1	37	2	5	3	0	2	5	0	0	0	0
0	2.72	25.4	5.35	3.04	5.81	1.08	1	38	2	5	3	1	3	3	1	1	0	1
0	2.72	23.3	5.5	1.05	6.07	1.18	2	32	2	5	3	0	3	4	0	0	0	0
0	2.72	22.9	5.89	2.7	5.5	1.29	1	42	2	5	3	0	2	4	0	0	0	1
0	2.72	33.2	6.17	1.59	4.97	1.23	1	40	2	5	3	0	1	3	0	0	0	1
0	2.72	26.7	6.21	3.03	5.23	1.21	1	40	2	5	3	0	2	4	0	0	0	1
0	2.72	23.4	5.93	1.31	5.38	1.25	2	36	2	5	3	0	2	4	0	0	0	1
0	2.72	20.8	5.58	1.5	5.74	1.51	2	28	1	5	3	0	2	4	0	0	0	0
0	2.71	21.5	6.18	0.86	4.88	1.85	2	35	2	5	3	0	2	3	0	0	0	1
0	2.71	23.1	5.28	1.88	4.78	1.26	2	44	2	5	3	0	3	3	0	0	0	1
0	2.71	25.5	4.75	1.04	4.95	1.31	2	40	2	5	3	0	3	4	0	0	0	0
0	2.71	24.3	5.63	1.48	5.69	1.12	1	65	2	3	2	1	2	3	0	0	0	0
0	2.71	30.2	5.2	1.19	4.96	1.1	2	34	2	5	3	0	2	4	0	1	0	0
0	2.71	20.8	7.18	1.71	4.84	1.52	1	30	2	5	3	1	1	2	0	0	0	1
0	2.71	0	4.91	3.8	5.98	1.06	1	28	2	4	3	1	3	4	1	0	0	1
0	2.71	23.6	5.27	1.97	5.3	1.16	1	26	2	5	3	1	2	4	0	0	0	1
0	2.7	26.5	5.13	2.87	5.39	0.89	1	40	2	4	3	1	3	4	1	1	0	1
0	2.7	24.3	4.77	1.49	5.6	1.16	1	38	2	5	3	0	3	5	0	0	0	0
0	2.7	#NULL!	5.86	2.51	4.79	1.36	1	32	2	5	3	1	3	3	0	1	0	1
0	2.7	28.8	5.1	3.52	5.27	0.94	2	31	2	5	3	0	2	4	0	0	0	1
0	2.69	31.8	6.6	15.39	15.79	1.18	2	44	2	5	3	0	2	3	0	0	1	1
0	2.69	29.7	5.27	1.71	5.05	1.32	2	42	2	5	2	0	2	5	0	1	0	1
0	2.69	20.1	5.06	1.29	4.46	1.07	2	37	2	5	3	0	2	4	0	0	0	0
0	2.69	25.7	5.63	3.9	5.07	0.95	1	34	2	3	3	1	1	5	0	0	0	1
0	2.69	29.9	4.91	1.42	4.45	1.02	1	33	2	5	3	0	2	3	0	1	0	0
0	2.69	17.3	5.26	0.89	5.04	1.23	2	38	2	5	3	0	2	4	0	0	0	0
0	2.69	34	5.01	2.17	6.37	1.01	1	36	2	5	3	1	2	3	0	1	0	1
0	2.69	28.5	5.28	2.54	5.49	0.99	1	38	2	4	3	1	2	3	1	0	0	1
0	2.69	28.5	4.65	1.96	4.98	0.71	1	38	2	5	3	1	2	5	0	0	0	1
0	2.69	23.5	4.71	7.69	5.68	0.95	2	37	2	5	3	0	2	5	0	0	0	1
0	2.69	21.2	5.49	4.43	5.25	1.07	1	41	3	5	3	0	2	2	1	0	0	1
0	2.69	26.3	5.07	1.58	4.72	1.09	2	41	2	4	3	0	2	4	0	0	0	0
0	2.69	29.6	5.24	3.21	4.39	0.99	1	26	1	5	3	0	1	4	0	1	0	1
0	2.69	28	5.33	1.07	5.12	1.29	1	32	2	5	3	0	2	4	0	0	0	0
0	2.68	28.3	5.53	2.06	4.84	1.08	1	37	2	5	3	1	2	#NULL!	1	0	0	1
0	2.68	0	5.2	1.71	4.92	1.41	2	36	2	5	3	0	2	5	0	0	0	1
0	2.68	0	5.05	1.29	4.5	1.1	1	36	1	5	3	2	3	3	0	0	0	0
0	2.68	24.8	6.9	1.9	5.65	1.27	1	38	2	5	3	0	2	3	0	1	0	1
0	2.68	22.8	5.57	0.73	4.81	1.59	1	38	2	5	3	1	1	4	0	0	0	0
0	2.68	26.9	5.48	3.26	5.58	1.04	1	40	2	3	3	1	1	4	0	0	0	1
0	2.68	25.9	4.95	0.91	4.81	1.12	1	27	1	5	3	0	3	4	0	0	0	0
0	2.67	0	6.79	0.6	4.45	1.84	2	35	2	5	4	0	1	3	0	0	0	1
0	2.67	33.3	4.94	2.31	6.05	0.94	1	35	2	5	3	0	2	3	0	0	0	1
0	2.67	26	5.28	1.36	4.93	1.11	1	33	2	5	3	1	2	3	0	0	0	0
0	2.67	24	5.27	4.83	5.77	0.9	1	37	2	5	3	1	2	4	0	0	0	1
0	2.67	24	5.36	1.58	5.12	0.99	1	36	2	5	3	0	1	5	0	0	0	0
0	2.67	24.6	5.47	2.61	5.01	1.47	2	33	2	5	3	0	1	4	0	0	0	1
0	2.67	27.7	5.71	2.29	5.43	1.44	1	29	2	5	3	1	2	3	1	0	0	1
0	2.67	24.1	7.6	2.81	5.28	1.51	1	32	2	5	3	0	3	4	0	1	0	1
0	2.67	18.4	5.77	0.85	4.56	1.84	2	32	2	5	3	0	1	4	0	0	0	1
0	2.67	21.6	4.85	1.83	5.26	0.9	1	31	2	5	3	0	2	5	0	0	0	1
0	2.66	24.6	5.87	1.87	4.96	1.06	1	36	2	5	3	0	2	4	0	1	0	1
0	2.66	26.3	5.01	5.02	10.62	0.97	1	38	2	4	3	1	1	4	1	1	0	1
0	2.66	26.8	5.21	2.4	4.96	1	1	56	2	5	3	2	2	4	1	1	0	1
0	2.66	28.3	4.92	1.42	5	0.96	1	36	2	5	3	0	2	3	0	0	0	0
0	2.66	28.2	5.97	2.05	5.69	1.09	1	41	2	5	3	1	2	4	1	0	0	1
0	2.66	25.3	5.23	2.12	5.62	1.1	1	40	2	5	3	1	3	4	1	1	0	1
0	2.66	24.4	4.9	0.97	5.17	0.96	1	37	2	5	3	1	2	4	0	0	0	0
0	2.66	22.3	5.15	1.41	5.52	1.03	2	41	2	5	3	0	2	4	0	0	0	0
0	2.66	0	4.92	0.73	4.44	0.94	2	27	2	5	3	0	2	4	0	0	0	0
0	2.65	24.9	5.26	1.19	5.52	1.41	2	41	2	5	3	0	1	4	0	0	0	0
0	2.65	23.8	5.13	0.78	5	1.28	2	34	2	5	3	0	2	5	0	0	0	0
0	2.65	25	5.53	1.97	4.88	1.1	2	49	2	5	3	0	2	4	0	0	0	1
0	2.65	27.9	5.14	1.84	5.09	0.87	2	41	2	3	3	0	3	5	0	0	0	1
0	2.65	29.5	4.67	2.46	5.35	0.85	1	37	2	5	3	0	1	4	0	0	0	1
0	2.65	25.5	6.73	3.25	5.37	1.53	1	44	2	5	3	0	1	4	0	1	0	1
0	2.65	31.1	4.89	2.5	5	1.01	2	33	2	5	3	0	1	4	0	0	0	1
0	2.65	24.6	5.39	3.82	4.46	0.86	1	30	2	5	3	0	3	4	1	0	0	1
0	2.65	24.6	5.39	3.82	4.46	0.86	1	30	2	5	3	0	3	4	1	0	0	1
0	2.65	0	5.04	2.29	5.39	1	1	32	2	5	3	0	1	4	0	0	0	1
0	2.65	21.5	5.31	2.9	6.06	0.86	1	52	2	3	2	1	2	2	0	0	0	1
0	2.64	23.7	5.28	1.04	5.16	1.48	2	41	2	5	3	0	2	3	0	0	0	0
0	2.64	25.2	5.55	1.21	4.84	1.19	1	36	2	5	4	0	2	4	0	0	0	0
0	2.64	26.3	5.14	3.3	4.86	0.95	1	40	2	5	3	1	3	5	0	0	0	1
0	2.64	25.9	5.41	0.77	5.68	1.23	2	42	2	5	3	0	1	4	0	0	0	0
0	2.64	#NULL!	5	1.58	4.96	1.04	2	35	2	5	3	0	2	2	0	1	0	0
0	2.64	29.6	5.01	1.93	5.41	1.07	1	42	2	5	3	1	2	4	1	1	0	1
0	2.64	0	5.86	4.13	5.09	1.02	1	40	2	4	3	2	3	2	0	1	0	1
0	2.64	24.1	5.17	1	5.96	1.23	1	36	2	5	3	0	1	4	0	0	0	0
0	2.64	21.4	4.82	1.04	6.01	1.02	1	42	2	4	3	1	2	4	0	0	0	0
0	2.64	24.2	4.75	2.22	5.7	0.78	1	33	2	5	3	1	2	4	0	0	0	1
0	2.64	17.1	4.88	1.8	5.31	1.16	2	33	2	5	3	0	1	4	0	0	0	1
0	2.64	28.9	5.04	2.07	5.39	0.99	2	40	2	5	3	0	2	3	0	1	0	1
0	2.64	23.9	4.93	2.4	4.43	1.07	1	28	2	5	3	1	1	4	0	0	0	1
0	2.64	18.8	5.2	0.88	4.63	1.32	2	31	2	5	3	1	2	4	1	0	0	0
0	2.64	21	5.14	1.78	6.11	1.13	1	29	2	5	3	0	1	4	0	0	0	1
0	2.64	34.6	4.98	2.48	5.58	0.94	1	32	2	5	3	1	2	3	0	0	0	1
0	2.64	25.8	5.04	1.56	5.62	1.03	1	28	2	5	3	0	3	5	0	0	0	0
0	2.64	23	5.58	1.93	4.36	1.3	2	32	2	5	3	0	2	5	0	0	0	1
0	2.63	30.5	4.93	1.83	4.82	0.82	1	33	2	5	3	1	2	2	0	0	0	1
0	2.63	28.2	5.42	3.12	4.54	0.83	1	33	2	5	3	1	1	4	0	0	0	1
0	2.63	26.1	4.91	1.77	4.99	0.91	1	37	2	5	3	0	2	3	0	0	0	1
0	2.63	27.8	5.16	2.18	4.63	0.9	1	35	2	5	3	0	2	3	0	1	0	1
0	2.63	26.8	4.96	1.11	5.99	0.94	1	46	2	4	3	1	3	3	0	1	0	0
0	2.63	17.4	6.75	0.68	4.71	1.84	2	31	2	5	3	0	2	3	0	0	0	1
0	2.63	23	4.95	1.34	4.97	1.01	2	42	2	5	3	0	1	4	0	0	0	0
0	2.63	26.5	5.53	3.94	6.02	1.3	1	29	2	4	3	0	2	4	0	1	0	1
0	2.63	24.4	6.13	0.9	5.15	1.35	1	64	2	4	3	2	2	3	1	1	0	1
0	2.63	20.6	6.28	0.9	6.01	1.54	1	69	2	3	2	0	3	2	1	0	0	1
0	2.62	29.5	5.15	1.23	5.41	1.04	1	43	2	5	3	0	3	4	0	1	0	0
0	2.62	21.8	4.96	0.86	5.02	1.14	2	42	2	5	3	0	3	3	0	0	0	0
0	2.62	25.4	6.48	1.03	4.5	1.42	2	38	2	5	3	0	3	3	0	0	0	1
0	2.62	29.4	4.97	1.38	5.44	1.12	1	42	2	4	3	1	3	3	1	0	0	0
0	2.62	28.2	4.81	1.46	5.22	0.9	1	43	2	5	3	0	2	4	0	1	0	0
0	2.62	23.9	4.97	2.06	5.36	1.1	1	36	2	5	3	0	1	4	0	0	0	1
0	2.62	29.4	5.06	1.88	5.21	1.15	1	34	2	5	3	1	2	5	0	0	0	1
0	2.62	25.2	5.05	3.47	5	1.06	2	35	2	5	3	0	2	5	0	0	0	1
0	2.62	19.5	5.01	0.99	4.53	1.19	2	34	2	5	3	0	2	4	0	0	0	0
0	2.62	21.6	4.52	2.28	4.85	0.97	2	33	2	5	3	0	2	3	0	0	0	1
0	2.62	30.3	5.01	1.26	5.05	1.07	2	30	2	5	3	0	1	4	0	0	0	0
0	2.62	0	4.86	1.41	4.84	0.86	1	41	2	5	3	1	2	3	0	0	0	0
0	2.61	24.9	5.09	1.47	5.11	1.13	1	42	2	5	3	0	3	3	0	0	0	0
0	2.61	24.2	6.12	1.54	5.64	1.22	2	41	2	3	3	0	2	5	0	0	0	1
0	2.61	24.1	5.42	1.42	6.14	1.01	1	56	2	4	3	1	2	5	0	1	0	0
0	2.61	24.1	5.12	1.6	5.7	1.24	1	38	2	4	3	1	2	3	1	0	0	0
0	2.61	20.2	5.06	1.28	5.67	1.28	1	40	2	3	3	0	1	4	0	0	0	0
0	2.61	28.1	5.27	1.71	5.5	0.93	2	38	2	5	3	0	2	4	0	0	0	1
0	2.61	25.9	4.81	1.74	5.5	0.91	1	40	2	5	3	1	2	3	1	0	0	1
0	2.61	29.2	5.67	3.15	5.31	1.25	1	38	2	5	3	1	2	4	1	0	0	1
0	2.61	21.6	5.59	0.76	4.59	1.61	2	29	3	5	3	0	2	3	0	0	0	0
0	2.61	22	5.36	2.14	4.89	1.23	2	37	2	4	2	0	2	4	0	0	0	1
0	2.61	23.3	5.6	0.97	5.55	1.22	1	31	2	4	3	0	2	4	0	0	0	0
0	2.61	23.8	5.38	0.86	4.54	1.37	2	33	2	5	3	0	2	4	0	0	0	0
0	2.61	21.3	5.06	2.21	5.11	0.98	1	32	2	4	3	1	2	4	0	0	0	1
0	2.61	27.1	5.28	2.18	4.6	1.02	1	28	2	5	3	0	3	4	0	0	0	1
0	2.61	0	4.94	2.28	6.42	0.96	1	49	2	4	3	1	3	5	1	0	0	1
0	2.6	24.5	4.67	2.17	5.43	0.86	1	39	2	5	3	0	2	3	0	0	0	1
0	2.6	28.9	4.7	1.2	6.02	0.91	1	36	2	5	3	1	2	4	0	1	0	0
0	2.6	25.4	5.79	0.79	4.93	1.75	2	40	2	5	3	0	2	4	0	0	0	1
0	2.6	24.6	5.11	2.38	4.88	1.03	1	40	2	5	3	0	2	3	0	1	0	1
0	2.6	23.9	4.85	2.41	4.96	0.86	1	35	2	4	3	1	2	4	1	0	0	1
0	2.6	27.7	5.32	8.46	5.09	0.98	1	40	2	5	3	1	2	5	0	1	0	1
0	2.6	26	4.89	1.18	5.47	0.94	1	36	2	5	3	0	2	4	0	1	0	0
0	2.6	23.7	5.01	1.55	5.17	0.99	1	37	2	5	3	0	2	4	0	0	0	0
0	2.6	25	5.53	3.13	5.07	1.13	1	44	2	5	3	0	3	3	0	0	0	1
0	2.6	31.2	7.45	6.14	6.59	1.37	1	39	2	5	3	0	2	3	1	1	0	1
0	2.6	27.2	5.84	2.08	6.05	0.95	1	42	2	5	3	0	2	4	0	1	0	1
0	2.6	24.4	4.99	2.66	5.03	1.13	1	31	1	5	3	1	3	3	1	0	0	1
0	2.6	23.1	5.23	1.19	4.3	1.1	1	31	1	5	3	0	2	4	0	0	0	0
0	2.59	22.9	4.75	0.89	6.37	0.95	1	38	2	5	3	1	1	2	1	0	0	0
0	2.59	0	4.51	1.7	5.29	0.81	1	35	2	5	3	0	3	3	0	0	0	1
0	2.59	20.1	5.05	1.3	5.23	1.22	2	41	2	5	3	0	2	4	0	0	0	0
0	2.59	26.5	5.03	1.12	5.39	1.25	1	41	2	4	3	1	3	4	1	1	0	0
0	2.59	22.3	5.32	1.21	4.86	1.43	2	33	2	5	3	0	1	4	0	0	0	0
0	2.59	19.8	4.91	0.8	5.03	1	2	31	2	5	3	0	2	5	0	0	0	0
0	2.59	0	4.9	1.31	4.81	1	1	24	2	3	2	1	2	3	0	0	0	0
0	2.58	33.6	5.17	4.1	4.83	0.97	1	38	2	4	3	0	2	4	1	1	0	1
0	2.58	22.8	5.34	3.9	5.09	1.16	1	39	2	5	3	1	1	4	0	0	0	1
0	2.58	24.9	5.05	2.49	4.79	1.02	1	32	2	5	3	0	3	5	0	0	0	1
0	2.58	32	4.53	1.49	5.52	0.8	1	30	1	5	3	1	1	4	0	0	0	0
0	2.58	26.1	6.52	4.57	6.65	1.2	1	38	2	5	3	1	2	4	0	0	0	1
0	2.58	24.2	6.44	1.21	4.69	1.55	1	30	2	5	3	1	2	3	1	0	0	1
0	2.58	29	5.59	2.49	5.92	1.12	1	37	2	5	3	0	2	3	1	1	0	1
0	2.58	22.8	4.7	1.95	5.9	0.88	1	37	2	4	3	0	2	4	0	0	0	1
0	2.58	21.1	5.87	1.14	5.43	1.22	2	30	2	5	3	0	1	4	0	0	0	1
0	2.58	23.7	5.24	1.59	6.09	1.11	1	31	2	5	3	0	1	4	1	1	0	0
0	2.58	29.1	5.73	1.55	5.45	1.2	1	29	2	4	3	1	3	3	1	1	0	1
0	2.58	24.8	5.02	0.87	4.82	1.33	2	52	2	5	3	0	2	3	0	0	0	0
0	2.58	45.2	5.5	4.07	5.82	0.92	1	22	1	5	3	0	3	2	0	1	0	1
0	2.57	24	4.68	1.44	5.12	0.92	1	37	2	5	3	0	1	5	1	1	0	0
0	2.57	21.9	6.18	1.65	4.66	1.13	2	36	2	4	3	0	2	4	0	0	0	1
0	2.57	25.5	6.94	3.55	14.07	1.19	1	41	2	5	3	1	2	4	0	1	0	1
0	2.57	24.5	4.98	1.53	5.12	1.16	2	31	2	5	3	0	2	4	0	0	0	0
0	2.57	28.8	4.81	1.39	5.65	1.1	1	29	2	5	3	0	2	5	1	0	0	0
0	2.57	22.4	5.19	1.08	4.75	1.25	2	32	2	5	2	0	2	5	0	0	0	0
0	2.56	28.4	5.28	5.6	5.87	0.98	2	39	2	5	3	0	2	4	0	0	0	1
0	2.56	22.2	5.34	2.22	4.99	1.08	1	32	2	5	2	0	2	2	0	0	0	1
0	2.56	19.5	5.02	0.74	5.03	1.39	2	34	2	5	3	0	2	4	0	0	0	0
0	2.56	22	6.19	2.47	4.77	1.06	1	33	2	5	3	0	1	4	0	0	0	1
0	2.56	32.5	4.59	3.3	5.24	0.84	1	32	2	5	3	1	2	4	0	1	0	1
0	2.56	24	5.35	1.31	4.87	1.45	2	45	2	4	3	0	2	3	0	0	0	0
0	2.56	26.8	4.95	1.65	5.98	1.06	1	51	2	3	3	0	2	3	0	1	0	0
0	2.56	27.1	5.36	3.44	5.06	1.04	1	34	2	5	3	1	3	4	1	0	0	1
0	2.56	24.4	4.74	3.64	4.51	0.88	1	30	2	5	3	0	1	3	0	0	0	1
0	2.56	#NULL!	5.29	1.56	5.35	1.58	2	32	2	5	3	0	2	4	0	0	0	0
0	2.56	23.9	4.69	0.81	4.74	1.47	2	24	1	5	4	0	2	3	0	0	0	0
0	2.55	28.8	6.4	2.43	5.23	1.09	1	50	2	4	3	0	1	4	0	0	0	1
0	2.55	25.5	5.29	0.58	5.35	1.57	2	42	2	5	3	0	1	5	0	1	0	0
0	2.55	25.9	5.21	0.88	5.68	1.25	1	37	2	5	3	0	3	3	0	1	0	0
0	2.55	24.9	4.64	1.31	4.56	0.82	1	33	2	5	3	0	2	4	0	0	0	0
0	2.55	0	6.24	4.57	5.39	1.07	2	35	2	4	3	0	2	5	0	0	0	1
0	2.55	26	5.97	1.08	5.69	1.52	1	43	2	5	3	0	2	4	1	0	0	1
0	2.55	22.6	6.35	3.83	5.42	1.09	1	52	2	3	3	1	3	3	1	0	0	1
0	2.55	24.5	5.19	1.53	5.32	1.13	2	42	2	5	3	0	1	4	0	0	0	0
0	2.55	22.1	5.06	2.31	4.52	1.14	2	34	2	5	3	0	2	4	0	0	0	1
0	2.55	26.9	4.57	6.35	7.02	0.94	1	50	2	3	3	1	3	3	0	0	0	1
0	2.55	30.2	4.91	2.58	10.88	1.05	2	33	2	3	3	0	2	5	0	1	0	1
0	2.54	24.8	4.82	1.53	5.01	1.08	1	40	2	5	3	0	2	3	0	0	0	0
0	2.54	37.1	5.24	1.25	4.74	1.05	1	39	2	5	3	0	2	3	0	0	0	0
0	2.54	23.1	4.93	1.14	5.74	1.07	1	43	2	5	3	0	3	4	0	0	0	0
0	2.54	23	4.91	3.27	5.08	0.92	1	35	2	5	3	0	1	4	0	1	0	1
0	2.54	24.5	5.01	1.31	6.27	1.15	1	38	2	5	4	0	2	4	0	1	0	0
0	2.54	28.8	4.66	1.06	5.67	0.99	2	73	2	2	3	0	2	1	0	0	0	0
0	2.54	27.2	5.33	2.45	5.53	0.82	1	37	2	5	3	0	3	3	0	0	0	1
0	2.54	30.2	5.06	4.9	4.77	0.88	1	32	2	5	3	1	2	4	1	1	0	1
0	2.54	30.2	5.59	2.27	5.89	1.08	1	43	2	5	3	0	3	3	1	1	0	1
0	2.53	22.8	4.65	1.18	5.46	1.1	1	49	2	5	3	1	1	5	1	0	0	0
0	2.53	23.7	4.73	1.77	4.73	0.89	1	34	2	5	3	1	2	4	1	0	0	1
0	2.53	22.3	4.91	1.59	6.23	0.99	1	32	2	5	3	0	2	5	0	0	0	0
0	2.53	23.6	5.72	0.59	4.86	1.69	2	44	2	5	3	0	1	3	0	0	0	1
0	2.53	25.4	5.65	1.2	5.91	0.98	1	39	2	5	4	0	1	4	0	0	0	0
0	2.53	23.4	6.92	14.77	12.87	1.23	1	37	2	5	3	1	2	4	0	1	0	1
0	2.53	0	5.07	1.94	4.76	1.26	2	34	2	5	3	0	1	4	0	0	0	1
0	2.53	21.1	4.97	1.44	4.95	1.17	1	34	2	5	3	0	2	4	0	0	0	0
0	2.53	23	4.95	2.34	5.07	0.99	1	33	2	4	3	0	2	4	0	0	0	1
0	2.53	21.9	5.6	0.93	5.38	1.35	1	76	2	3	3	0	1	3	0	0	0	0
0	2.53	22.8	4.58	1.1	4.78	1.01	1	32	2	5	3	0	2	4	0	0	0	0
0	2.53	27	4.82	1.68	4.59	1.03	2	34	2	5	3	0	1	4	0	0	0	0
0	2.53	26.6	5.22	1.16	4.45	1.2	1	33	2	5	3	0	3	4	0	0	0	0
0	2.53	22.2	4.69	0.8	5.32	1.22	2	29	2	5	3	0	1	4	0	0	0	0
0	2.53	21.7	5.37	2.69	5.42	1.02	1	31	2	5	3	0	2	4	0	0	0	1
0	2.53	25.3	4.61	2	5.14	0.95	1	24	1	5	2	1	3	3	0	0	0	1
0	2.52	23.9	5.25	1.18	4.44	1.36	2	44	2	5	3	0	2	4	0	0	0	0
0	2.52	37.8	5.88	1.75	6.6	1.06	1	31	2	5	3	0	2	4	1	1	0	1
0	2.52	23.9	4.82	0.93	4.7	1.12	1	49	2	5	3	0	1	4	0	0	0	0
0	2.52	23	4.49	1	4.74	1.3	2	37	2	5	3	0	1	3	0	0	0	0
0	2.52	22.4	5.83	2.22	7.9	1.68	1	33	2	5	3	1	2	4	1	1	0	1
0	2.52	27.4	5.14	0.57	5.07	1.11	2	40	2	4	3	0	3	4	0	0	0	0
0	2.52	27.5	5.51	2.1	4.61	1.27	1	40	2	5	3	0	1	4	0	1	0	1
0	2.52	23	4.88	1.33	5.43	1.02	1	29	2	5	3	0	3	4	0	0	0	0
0	2.52	25.2	5.07	2.34	4.75	1.08	1	29	2	5	3	1	2	3	1	0	0	1
0	2.52	#NULL!	4.85	0.58	4.94	1.28	2	30	2	5	3	0	1	3	0	0	0	0
0	2.51	25.1	4.75	1.74	4.77	0.95	2	34	2	5	3	0	1	5	0	0	0	1
0	2.51	21.5	4.57	2.63	5.8	0.86	1	32	2	5	3	0	1	4	0	0	0	1
0	2.51	29.5	5	2.67	5	0.79	1	52	2	3	3	0	2	3	0	1	0	1
0	2.51	28.1	5.78	1.3	4.63	1.35	1	32	2	5	3	0	2	4	1	0	0	1
0	2.51	18.9	6.1	0.69	4.44	2.04	2	40	2	5	3	0	3	3	0	0	0	1
0	2.51	26.9	5.2	1.55	5.83	1.25	1	37	2	5	3	2	3	5	1	0	0	0
0	2.51	27.3	4.8	3.17	5.24	0.8	1	36	2	5	3	0	2	4	0	1	0	1
0	2.51	25	4.67	2.12	5.4	0.86	1	32	2	5	3	1	3	3	0	0	0	1
0	2.51	24.4	4.92	2.56	4.54	0.97	1	31	2	5	4	0	1	3	1	0	0	1
0	2.51	27.4	5.2	1.36	5.3	0.92	2	30	2	3	2	0	2	5	0	0	0	0
0	2.51	25.1	4.56	1.07	5.09	1.03	2	30	2	5	3	0	2	6	0	0	0	0
0	2.51	20.3	6.93	0.98	5.34	1.67	2	34	2	5	3	0	2	3	0	0	0	1
0	2.51	25.6	4.22	1.03	4.83	1.06	1	52	2	4	3	0	2	4	0	1	0	0
0	2.5	26.9	7.09	1.77	5.31	1.45	1	37	2	5	3	0	2	4	1	0	0	1
0	2.5	25.2	6.12	0.68	5.28	1.48	1	43	2	5	3	0	1	3	1	0	0	1
0	2.5	24.7	4.33	1.9	5.34	0.82	1	44	2	5	3	1	2	3	0	0	0	1
0	2.5	22.1	4.66	1.31	5.76	0.98	1	45	2	5	3	1	1	4	1	0	0	0
0	2.5	30.3	7.47	8.9	16.66	1.24	1	39	2	5	3	1	1	4	0	0	1	1
0	2.5	30.3	7.47	8.9	16.66	1.24	1	39	2	5	3	1	1	4	0	0	1	1
0	2.5	26.5	5.98	2.21	5.57	1.22	1	69	2	5	5	2	2	4	0	1	0	1
0	2.5	23.6	6.22	3.93	4.99	1.05	1	33	2	5	3	0	1	4	0	0	0	1
0	2.5	27.6	4.8	1.87	5	1.08	2	33	2	5	3	0	2	3	0	0	0	1
0	2.5	24.2	4.84	1.37	5.27	0.91	1	39	2	4	3	0	2	4	0	0	0	0
0	2.5	29.1	4.88	3.03	4.62	0.93	1	37	2	5	3	0	2	3	0	0	0	1
0	2.5	27.4	4.77	3.34	5.37	0.91	1	40	2	5	3	0	1	4	0	0	0	1
0	2.5	24.4	4.81	0.69	4.9	1.14	2	29	1	5	3	0	2	4	0	0	0	0
0	2.5	0	4.58	0.83	4.96	1.11	1	29	2	5	3	1	2	5	0	0	0	0
0	2.49	32.4	4.77	2.89	5.63	0.81	1	42	2	5	4	1	2	3	1	1	1	1
0	2.49	25.8	4.72	2.42	4.83	0.89	1	37	2	5	3	0	3	3	0	0	0	1
0	2.49	24.9	5.61	3.1	5.13	1.06	2	37	2	5	3	0	2	4	0	0	0	1
0	2.49	22.9	4.93	1.4	5.66	1.02	1	54	2	5	3	0	2	4	0	0	0	0
0	2.49	24.8	5.45	1.9	5.53	1.31	2	43	2	5	3	0	1	3	0	0	0	1
0	2.49	26.8	4.69	0.99	4.58	0.98	1	33	2	5	3	0	2	4	0	0	0	0
0	2.49	22.9	4.98	1.25	4.83	1.25	2	33	2	5	3	0	2	4	0	0	0	0
0	2.49	23.5	4.85	1.2	5.01	1.19	1	31	2	5	3	1	1	3	1	0	0	0
0	2.48	28	5.08	1.26	5.51	1.27	2	36	2	5	3	0	2	4	0	1	0	0
0	2.48	21.7	4.7	0.89	12.19	1.12	1	36	2	5	3	1	3	#NULL!	0	0	1	0
0	2.48	23.2	8.4	11.1	6.88	1.43	1	37	2	5	3	0	3	4	0	0	0	1
0	2.48	25.3	4.63	2.22	5.29	0.8	1	33	2	5	3	1	2	4	0	0	0	1
0	2.48	23.4	5.74	3.29	9.67	0.89	1	46	2	5	3	1	2	2	1	0	1	1
0	2.48	25.6	5.24	1.95	5.2	0.98	1	51	2	5	3	1	1	4	1	0	0	1
0	2.48	29.5	4.67	1.07	4.79	0.92	1	34	2	5	3	0	1	3	0	0	0	0
0	2.48	26.5	5.25	0.7	4.78	1.56	2	34	2	5	3	0	2	4	0	0	0	0
0	2.48	26.5	5.33	1.29	5.27	1.31	2	33	2	5	3	0	3	2	0	0	0	0
0	2.48	33.8	4.65	3.57	4.95	0.78	1	30	2	5	4	0	3	3	0	1	0	1
0	2.48	20.1	5.71	0.7	6.16	1.64	2	56	3	4	3	0	2	4	0	1	1	1
0	2.48	24.8	5.81	8.92	5.62	1.29	1	43	2	3	3	1	2	2	0	1	0	1
0	2.47	21.6	4.98	1.46	5.2	1.15	1	39	2	5	2	1	2	3	0	0	0	0
0	2.47	25.9	5.65	2.54	5.74	1.02	1	38	2	5	3	0	2	3	1	0	0	1
0	2.47	24.6	5.14	1.47	5.43	1.26	1	41	2	5	3	0	1	4	0	0	0	0
0	2.47	28.5	4.99	4.51	5.25	1.05	1	34	2	5	4	0	1	4	1	0	0	1
0	2.47	26.6	6	2.05	11.64	1.1	1	41	2	5	3	1	2	2	0	0	0	1
0	2.47	30.5	5.81	4.01	4.52	1.08	1	33	2	5	3	0	1	4	0	1	0	1
0	2.47	25.5	4.99	2.76	5.27	0.88	1	34	2	5	3	1	3	4	0	0	0	1
0	2.47	0	5.19	0.73	4.89	1.79	2	32	2	5	3	0	1	5	0	0	0	0
0	2.47	22.7	6.02	3.36	5.61	1.27	2	30	2	5	3	0	2	4	0	0	0	1
0	2.46	26.5	6.5	0.79	5.45	1.92	2	43	2	4	3	0	2	3	0	0	0	1
0	2.46	23.7	4.97	7.66	5.28	0.93	2	44	2	5	2	0	2	3	0	1	0	1
0	2.46	28.7	4.82	2.62	5	1.01	2	32	2	5	3	0	1	4	0	0	0	1
0	2.46	25.9	6.03	4.8	5.44	1.07	1	35	3	5	3	0	2	3	1	1	0	1
0	2.46	26.9	4.82	0.73	5.15	1.02	1	32	2	5	3	1	2	3	0	0	0	0
0	2.46	25.9	5.15	0.97	5.16	1.38	2	34	2	4	3	0	2	4	0	0	0	0
0	2.46	35.3	4.95	2.54	6.71	0.99	1	38	2	4	3	1	3	2	1	1	1	1
0	2.46	26.4	5.17	1.96	5.99	0.9	2	41	2	5	3	0	2	5	0	1	0	1
0	2.46	22.7	6.08	1.54	5.57	1.26	1	62	2	4	3	0	1	2	1	1	0	1
0	2.46	23.6	5.26	2.58	5	1.06	1	43	2	5	2	1	1	4	1	1	0	1
0	2.46	22	6.05	3.05	5.02	1.01	2	44	2	3	3	0	2	5	0	0	0	1
0	2.46	21.1	5.24	0.66	4.62	1.53	2	34	2	5	3	0	3	4	#NULL!	0	0	0
0	2.46	26.3	5.88	0.87	4.85	1.55	1	33	2	5	2	0	1	3	1	0	0	1
0	2.46	33.8	5.18	0.88	5.52	1.82	2	32	2	5	3	0	2	4	0	0	0	0
0	2.46	33.8	5.18	0.88	5.52	1.82	2	32	2	5	3	0	2	4	0	0	0	0
0	2.46	24.7	5.09	0.95	5.99	1.34	1	35	2	5	3	0	2	5	0	0	0	0
0	2.45	27.9	5.27	4.68	6.48	0.99	1	40	3	4	3	0	1	2	0	1	0	1
0	2.45	28.3	4.99	2.47	5.12	1	1	37	2	5	3	1	3	4	0	0	0	1
0	2.45	22.7	7.15	4.9	5.43	1.8	1	37	2	5	3	1	3	3	1	1	1	1
0	2.45	24.7	4.31	0.56	4.91	0.92	2	41	2	5	3	0	2	4	0	0	0	0
0	2.45	25.8	4.51	2.22	4.98	0.88	1	35	2	5	3	0	2	4	0	0	0	1
0	2.45	21.2	4.92	1.34	4.41	1.13	2	34	2	5	3	0	2	5	0	0	0	0
0	2.45	35.6	5.75	1.79	9.11	0.96	1	40	2	5	3	0	1	4	1	0	0	1
0	2.45	0	4.68	3.1	5.15	0.89	1	34	2	5	3	1	2	4	1	0	0	1
0	2.45	21.7	4.99	1.3	4.7	1.23	2	41	2	5	3	0	2	3	0	0	0	0
0	2.45	0	6.85	9.07	5.74	1.11	1	34	2	5	3	1	1	3	0	0	0	1
0	2.45	20.6	4.9	1.11	5.04	1.18	2	31	2	5	3	0	1	4	0	0	0	0
0	2.45	0	5.89	1.09	5.76	1.28	2	30	1	5	3	0	2	5	0	0	0	1
0	2.45	0	4.67	2.83	5.77	0.9	2	32	2	5	3	0	1	4	0	0	0	1
0	2.45	24.6	4.57	1.24	5.09	1.08	2	33	2	3	3	0	2	3	0	0	0	0
0	2.44	28	4.91	3.33	5.17	0.94	1	37	2	5	3	0	3	3	0	1	0	1
0	2.44	31.6	4.83	3.6	5.36	0.87	1	34	2	5	3	1	2	5	0	0	0	1
0	2.44	22.5	4.4	1.18	4.99	1.01	2	37	2	5	3	0	2	4	0	0	0	0
0	2.44	22.3	5.2	2.02	4.69	1.4	1	42	2	5	3	0	2	4	0	0	0	1
0	2.44	29.3	4.87	2.74	4.46	0.95	1	33	2	5	3	1	2	5	0	0	0	1
0	2.44	0	4.75	1.18	5.2	1.11	2	32	2	5	3	0	2	4	0	0	0	0
0	2.44	24.6	5.6	3.7	4.89	1.02	1	37	2	5	3	1	1	4	0	0	0	1
0	2.44	25.3	4.89	1.85	4.19	1.1	1	35	2	5	3	1	3	3	0	0	0	1
0	2.44	40.7	4.68	3.04	3.97	0.85	1	34	2	5	3	0	2	3	0	0	0	1
0	2.44	25.9	4.73	1.13	5.76	1.06	2	54	2	5	5	0	3	5	0	0	0	0
0	2.44	23.1	5.21	0.88	7.75	1.3	1	57	2	4	3	0	2	3	0	0	0	0
0	2.44	23.1	5.21	0.88	7.75	1.3	2	63	2	4	1	0	3	4	0	0	0	0
0	2.44	25.3	4.91	1.58	4.68	1.34	2	37	2	5	3	0	2	5	0	0	0	0
0	2.44	26.1	5.31	1.93	5.57	0.92	1	35	2	5	3	1	2	3	1	0	0	1
0	2.44	33	4.8	1.63	5.05	1.15	2	27	2	5	3	0	1	4	0	0	0	0
0	2.44	18.8	4.85	0.65	4.88	1.45	2	28	1	5	3	0	1	3	0	0	0	0
0	2.44	28.1	5.42	2.17	6.22	0.88	1	50	2	2	2	1	3	4	0	0	0	1
0	2.43	26.9	5.47	1.92	5.71	1.16	1	41	2	5	3	0	1	3	0	0	0	1
0	2.43	30.6	5.9	5.72	8.18	1.13	1	43	2	5	3	1	2	4	1	1	0	1
0	2.43	23.5	5.2	1.08	4.89	1.58	1	38	2	5	3	1	1	5	0	0	0	0
0	2.43	23.7	5.26	2.91	5.1	1.37	1	34	2	5	3	0	1	3	0	0	0	1
0	2.43	24.4	4.52	1.35	4.43	0.95	1	37	2	5	3	0	3	4	0	1	0	0
0	2.43	27.8	5.37	3.27	5.47	0.97	2	34	2	5	2	0	1	5	0	0	0	1
0	2.43	17.5	5.06	1.41	4.91	1.38	2	35	2	5	3	0	2	2	0	0	0	0
0	2.43	21.7	4.95	1.31	5.07	1.28	1	38	2	5	3	0	2	4	1	0	0	0
0	2.43	21.1	5.08	0.98	4.96	1.35	2	36	2	5	3	0	1	4	0	0	0	0
0	2.43	25.2	4.61	2.54	5.26	0.87	1	31	2	5	3	0	2	4	0	1	0	1
0	2.43	25.8	4.94	1.17	5.5	1.21	1	25	1	5	3	0	2	4	0	0	0	0
0	2.43	18	5.3	0.85	4.96	1.87	2	26	2	5	3	0	1	4	0	0	0	0
0	2.42	20.1	4.95	1.53	5.24	1.28	2	38	2	5	3	0	2	4	0	0	0	0
0	2.42	25.3	4.74	2.52	5.02	1.01	2	52	2	4	3	0	2	5	0	0	0	1
0	2.42	29	5.04	2.72	4.84	1.09	1	38	2	5	3	0	1	4	0	1	0	1
0	2.42	23.3	5.05	2.76	4.77	1.14	1	33	2	5	3	0	1	4	0	1	0	1
0	2.42	27.9	4.45	0.97	5.46	0.91	1	36	2	5	3	0	2	3	0	0	0	0
0	2.42	22.7	5.42	0.81	5.19	1.42	2	64	2	3	3	0	3	3	0	1	0	0
0	2.42	24.3	4.5	1.75	5.31	0.9	2	31	2	4	3	0	3	5	0	0	0	1
0	2.42	23.6	4.48	1.53	4.61	0.87	2	32	2	5	4	0	1	4	0	0	0	0
0	2.42	26.4	4.98	1.63	4.35	0.92	1	41	2	4	3	1	2	3	0	0	0	0
0	2.42	23	4.72	1.46	4.2	1.06	2	42	2	5	3	0	1	4	0	0	0	0
0	2.42	20.6	5.22	1.05	4.71	1.3	2	28	1	5	3	0	1	4	0	0	0	0
0	2.42	19	4.7	1.12	4.59	1.19	2	43	2	5	3	0	2	3	0	0	0	0
0	2.42	#NULL!	5.04	0.85	5.26	1.66	2	29	2	5	3	0	1	5	0	0	0	0
0	2.42	27.6	4.88	1.45	4.8	1.15	1	27	1	5	3	1	2	3	0	0	0	0
0	2.41	22.8	4.84	1.11	5.3	1.27	2	44	2	4	3	0	3	3	0	0	0	0
0	2.41	26.2	4.53	1.62	4.75	0.85	1	32	2	5	3	1	2	4	0	0	0	0
0	2.41	32	6.74	1.9	5.46	0.97	1	37	2	5	3	0	2	3	0	0	0	1
0	2.41	22.7	5.67	1.42	5.49	1.29	1	41	2	4	3	1	3	4	1	0	0	0
0	2.41	22.9	4.81	0.96	5.43	1.16	1	40	2	5	2	0	2	4	1	0	0	0
0	2.41	22.9	4.84	2.03	5.05	1.02	2	39	2	5	3	0	2	3	0	0	0	1
0	2.41	28.7	4.07	5.89	5.52	0.81	2	44	2	3	3	0	3	3	0	0	0	1
0	2.41	32.3	4.69	1.98	5.31	0.96	1	42	2	4	3	0	2	5	0	1	0	1
0	2.41	30.7	4.99	2.06	5.25	1.17	1	34	1	5	3	0	2	4	0	0	0	1
0	2.41	23.6	4.22	0.97	4.89	1.15	1	37	2	5	3	0	3	4	0	0	0	0
0	2.41	32.5	4.19	2.37	4.79	0.83	1	27	2	5	3	1	2	5	0	0	0	1
0	2.41	21.1	5.2	0.8	4.96	1.53	2	35	2	5	3	0	2	5	0	0	0	0
0	2.41	0	4.47	1.49	4.68	0.91	1	87	2	5	3	2	1	4	0	0	0	0
0	2.41	21.1	6.22	1.53	5.13	1.63	2	26	2	5	3	0	1	4	0	0	0	1
0	2.41	0	5.72	3.12	12.91	0.97	1	36	2	3	3	1	3	4	0	0	1	1
0	2.41	0	4.63	1.5	5.55	0.97	1	55	2	5	3	1	2	3	1	0	0	1
0	2.4	27.8	5.27	2.16	5.73	0.96	1	51	2	5	3	0	2	3	0	0	0	1
0	2.4	27	4.92	1.51	5.27	0.95	1	39	2	5	2	0	3	3	1	0	0	0
0	2.4	27.9	4.76	1.13	6.58	1.15	2	41	2	5	3	0	2	4	0	0	0	0
0	2.4	33.3	4.4	3.8	4.51	0.84	1	34	2	5	2	1	2	3	0	1	0	1
0	2.4	26.1	4.88	1.68	4.88	1.2	1	33	2	5	3	0	1	4	0	0	0	0
0	2.4	24.5	6.16	0.95	5	2.07	2	34	2	5	3	0	2	3	0	0	0	1
0	2.4	24.5	5.1	0.94	5.09	1.02	1	36	2	5	3	0	2	4	0	0	0	0
0	2.4	21	4.86	1.77	4.9	1.46	2	47	2	5	3	0	2	2	0	0	0	1
0	2.4	27.6	5.59	1.58	4.78	1.32	2	44	99	5	3	0	2	3	0	1	0	0
0	2.4	27.6	5.59	1.58	4.78	1.32	2	44	99	5	3	0	2	3	0	1	0	0
0	2.4	25.8	5.77	1.02	5.48	1.38	1	51	2	5	3	1	2	4	0	0	0	1
0	2.4	21.2	4.79	1.05	4.33	1.42	2	34	2	5	3	0	2	5	0	0	0	0
0	2.4	0	4.91	0.67	4.28	1.52	2	32	2	4	3	0	1	5	0	0	0	0
0	2.39	18.2	5.09	1.08	4.46	1.51	2	35	2	5	3	0	1	2	0	0	0	0
0	2.39	22.5	5.12	1.26	5.38	1.29	1	65	2	5	3	0	2	3	0	0	0	0
0	2.39	18.3	4.49	0.66	4.21	1.08	2	34	2	5	3	0	3	4	0	0	0	0
0	2.39	22.6	4.97	1.09	4.53	1.09	2	32	2	5	3	0	2	3	0	0	0	0
0	2.39	20	5.27	1	4.53	1.36	2	37	2	5	3	0	1	4	0	0	0	0
0	2.39	27.7	4.88	2.34	5.26	0.85	1	34	2	5	3	1	2	3	0	1	0	1
0	2.39	22.8	5.3	0.99	5.4	1.38	2	41	2	5	3	0	3	4	0	0	0	0
0	2.39	0	5.11	2.37	5.79	1.15	2	48	2	3	3	0	1	3	0	0	0	1
0	2.39	28.6	5.62	6.48	10.69	1.03	2	39	2	4	3	0	3	5	0	1	1	1
0	2.39	27.2	5.23	1.86	4.76	1.08	2	35	2	5	3	0	1	4	0	1	0	1
0	2.39	23.1	4.63	2.17	4.93	1.03	1	34	2	5	3	0	1	4	0	1	0	1
0	2.39	27.9	4.96	1.86	4.9	0.97	2	34	2	5	3	0	2	4	0	0	0	1
0	2.39	17.4	6	1.39	4.57	0.94	2	31	2	5	3	0	2	4	0	0	0	1
0	2.39	#NULL!	5.19	2.76	5.34	0.78	2	27	1	5	3	0	1	3	0	0	0	1
0	2.39	19.6	5.08	1.14	4.49	1.54	2	32	2	5	3	0	2	4	0	0	0	0
0	2.38	24.6	4.79	1.29	5.19	1.02	2	42	2	5	3	0	2	2	0	0	0	0
0	2.38	21.6	5.94	1.63	6.14	1.45	1	38	2	5	3	0	1	3	1	0	0	1
0	2.38	37.8	5.47	6.93	5.38	1.11	1	44	2	4	3	0	3	4	1	1	0	1
0	2.38	24.4	4.64	6.74	4.63	0.76	1	39	2	5	3	1	2	3	0	0	0	1
0	2.38	27.7	4.47	0.84	5.58	1.01	1	34	2	5	3	1	2	4	1	0	0	0
0	2.38	#NULL!	4.89	1.29	7.46	0.89	2	42	2	5	3	0	2	4	0	1	0	0
0	2.38	23.4	4.75	1.87	4.58	0.99	1	33	2	5	3	2	1	4	0	0	0	1
0	2.38	23.7	5.04	0.77	4.58	1.43	1	33	2	5	3	1	3	4	0	0	0	0
0	2.38	26.7	4.64	1.57	6.72	0.99	1	40	2	5	3	2	1	4	0	0	1	0
0	2.38	25.4	6.22	4.37	5.36	1.2	1	33	2	5	3	1	2	2	1	0	0	1
0	2.38	33	5.21	1.28	5.64	1.11	1	31	2	5	3	1	3	4	0	0	0	1
0	2.38	22.5	4.84	1.58	4.79	0.96	2	32	2	5	3	0	1	4	0	0	0	0
0	2.38	21.2	5.23	1.75	4.65	1.36	2	32	2	5	3	0	1	4	0	0	0	1
0	2.38	29.9	5.11	1.52	4.29	0.98	1	24	1	99	2	0	2	4	0	0	0	0
0	2.38	20.9	4.89	0.9	5.07	1.19	2	26	2	4	3	0	3	4	0	0	0	0
0	2.37	23.5	4.22	1.78	5.7	0.79	1	38	2	5	3	1	2	4	0	0	0	1
0	2.37	30.8	4.52	4.29	4.79	0.79	1	35	2	5	3	0	3	3	0	0	1	1
0	2.37	23.1	4.74	1.31	5.59	1.06	2	42	2	5	3	0	2	5	0	0	0	0
0	2.37	25.4	5.04	0.96	4.76	1.31	1	35	2	5	4	1	2	4	1	0	0	0
0	2.37	23.6	5.56	1.67	5.62	1.25	2	35	2	5	3	0	1	4	0	0	0	0
0	2.37	22.2	4.81	1.44	4.83	1.2	2	58	2	5	3	0	2	4	0	0	0	0
0	2.37	28.1	4.3	2.2	5.47	0.96	1	44	2	4	3	1	2	3	1	0	0	1
0	2.37	23.3	6.86	3.27	5.36	1.32	1	31	2	5	3	0	1	4	0	0	0	1
0	2.37	26	4.98	1.38	5.21	0.94	1	27	2	5	3	1	2	4	0	0	0	0
0	2.37	23	4.54	0.7	5	1.22	2	29	2	5	3	0	1	4	0	0	0	0
0	2.37	27.3	5.83	1.83	6.29	1.38	1	45	2	2	3	0	2	4	0	1	0	1
0	2.36	22.1	8.23	5.25	6.55	1.34	2	54	2	5	3	0	2	4	0	0	0	1
0	2.36	22.8	4.71	1.3	5.02	1.26	1	61	2	5	3	1	2	1	1	1	0	0
0	2.36	23.4	4.77	1.09	4.95	1.12	1	34	2	5	3	0	1	5	0	0	0	0
0	2.36	25.2	5.68	4.7	10.26	1.16	1	35	2	5	3	1	1	4	0	0	0	1
0	2.36	21.7	5.16	0.68	4.77	1.68	2	35	2	5	3	0	2	3	0	0	0	0
0	2.36	26.3	4.57	1.48	5.11	1	1	36	2	5	3	1	1	4	1	1	0	0
0	2.36	18	4.68	0.77	4.97	1.39	2	35	2	5	3	0	2	5	0	0	0	0
0	2.36	29.3	4.6	1.43	5.15	0.95	1	34	2	5	3	0	3	3	0	1	0	0
0	2.36	24.8	4.94	1.48	4.92	1.32	1	38	2	5	3	0	2	3	1	0	0	0
0	2.36	22.8	5.08	0.92	4.58	1.37	2	37	2	5	3	0	2	3	0	0	0	0
0	2.36	23.6	5.17	6.78	7.06	1.06	1	37	2	4	3	0	2	4	1	0	0	1
0	2.36	24.1	5.45	1.62	5.86	1.44	1	35	2	5	3	0	3	4	0	0	0	0
0	2.36	23.4	4.65	0.73	5.77	1.08	2	38	2	5	3	0	1	4	0	0	0	0
0	2.36	26.9	4.92	1.29	4.76	1.21	2	41	2	3	2	0	1	3	0	0	0	0
0	2.36	20.9	4.46	1.28	4.77	0.82	2	23	2	5	3	0	1	4	0	0	0	0
0	2.36	26.5	4.7	1.62	5.68	1.2	1	28	2	5	3	0	2	4	0	0	0	0
0	2.35	33.9	5.13	2.38	5.15	0.9	1	36	2	5	3	0	1	3	0	0	0	1
0	2.35	28.5	5.26	3.56	5.39	0.97	1	37	2	5	3	1	1	4	1	0	0	1
0	2.35	25	4.56	1.71	4.96	0.87	2	40	2	5	3	0	3	4	0	0	0	1
0	2.35	26.3	4.8	0.89	5.01	1.29	1	34	2	5	3	0	1	3	0	0	0	0
0	2.35	22.2	5.07	1.01	5.4	1.49	1	33	2	5	3	0	2	4	0	0	0	0
0	2.35	21	5.03	1.04	4.71	1.45	2	39	2	5	3	0	1	4	0	0	0	0
0	2.35	31.4	4.96	3.13	4.9	1.13	1	36	3	5	3	1	2	3	0	0	0	1
0	2.35	22.6	4.5	1.33	5.16	0.94	1	34	2	4	3	1	3	3	0	0	0	0
0	2.35	30	5.11	5.1	11.25	1.08	1	40	2	5	3	1	3	5	1	0	0	1
0	2.35	25.8	4.84	1.79	5.3	1.06	2	37	2	5	3	0	2	4	0	0	0	1
0	2.35	28.9	4.57	2.31	4.72	0.87	1	43	2	5	3	0	2	4	1	0	0	1
0	2.35	30	4	2.22	5.96	0.88	1	36	2	5	3	1	2	3	0	1	0	1
0	2.35	24.6	4.39	0.99	4.7	0.85	1	32	2	5	3	0	2	3	0	0	0	0
0	2.35	0	5.01	2.44	6.07	1.05	2	33	2	4	2	0	3	4	0	0	0	1
0	2.35	22.8	5.1	1.13	5.72	1.25	1	25	1	5	3	0	2	3	1	1	0	0
0	2.35	23	4.89	0.98	5.31	0.97	1	26	2	4	3	1	3	4	0	0	0	0
0	2.35	20.8	4.83	0.92	5.24	1.5	2	29	2	5	3	0	1	3	0	0	0	0
0	2.35	23.6	4.45	1.06	5.12	0.97	2	27	2	5	3	0	3	3	0	0	0	0
0	2.35	0	5.04	0.53	5.17	1.16	2	29	2	4	3	0	2	4	0	0	0	0
0	2.34	29.1	5.05	1.93	5.24	1.18	1	38	2	5	3	0	3	4	0	0	0	1
0	2.34	29.7	4.53	1.56	4.6	0.96	2	41	2	4	3	0	1	5	0	0	0	0
0	2.34	26.5	4.89	2.68	5.19	0.94	1	34	2	5	3	0	2	4	0	0	0	1
0	2.34	21.8	5.21	1.87	4.87	1.2	2	38	2	5	3	0	2	5	0	0	0	1
0	2.34	21.6	4.65	3.09	5.92	1	2	39	2	5	3	0	2	4	0	0	0	1
0	2.34	20.2	5.21	1.6	4.51	1.33	2	34	2	5	3	0	1	4	0	0	0	0
0	2.34	20.6	6.6	0.58	6	2.15	1	42	2	5	3	0	2	4	1	0	0	1
0	2.34	22.5	5.87	3.93	5.02	1.01	2	56	2	5	3	0	2	4	0	0	0	1
0	2.34	0	4.59	2.02	4.82	0.94	2	31	2	5	3	0	2	4	0	0	0	1
0	2.34	0	5.63	2	5.44	1.28	2	33	2	5	3	0	2	4	0	0	0	1
0	2.34	27	5.28	1.81	4.81	1.21	1	28	2	5	3	0	2	4	0	1	0	1
0	2.34	27	5.28	1.81	4.81	1.21	1	28	2	5	3	0	2	4	0	1	0	1
0	2.34	21.7	5.06	0.75	4.59	1.41	1	31	2	5	3	1	3	4	0	0	0	0
0	2.34	23.6	5.66	1.01	5.52	1.5	1	74	2	4	3	0	2	4	0	1	0	0
0	2.34	28.1	4.77	4.11	4.95	0.94	2	34	2	4	2	0	2	4	0	0	0	1
0	2.33	26.4	5.17	1.26	4.62	1.24	2	44	2	5	3	0	2	4	0	0	0	0
0	2.33	23.9	4.47	2.35	5.63	1	2	38	2	3	3	0	2	3	0	0	0	1
0	2.33	26.2	4.52	2.52	5.94	0.9	1	33	2	5	3	1	2	4	0	0	0	1
0	2.33	26.7	4.96	1.14	4.84	1.32	2	38	2	5	2	0	1	3	0	0	0	0
0	2.33	30.3	4.72	1.14	5.22	1.18	1	41	2	5	3	1	3	3	1	1	0	0
0	2.33	27.7	4.65	0.86	4.45	1.18	2	37	2	5	3	0	2	4	0	0	0	0
0	2.33	25.7	4.9	1.47	5.84	1.48	1	37	2	5	3	0	3	4	0	1	0	0
0	2.33	30	5.25	2.88	6.15	0.93	1	38	2	5	3	1	1	4	1	0	0	1
0	2.33	24.2	5.38	1.8	5.39	1.16	1	52	2	5	3	0	2	2	1	0	0	1
0	2.33	28.8	4.57	1.04	4.82	1.02	2	31	2	5	3	0	2	3	0	0	0	0
0	2.33	25.9	4.32	2.03	14.25	0.88	1	43	2	5	3	1	3	4	1	0	1	1
0	2.33	23	4.48	1.47	4.78	1.01	1	34	2	5	3	0	1	4	0	0	0	0
0	2.33	27.6	5.73	3.59	6.33	1.31	1	41	2	5	3	1	1	3	1	1	0	1
0	2.33	26.8	5.07	1.14	5.41	1	1	41	3	3	3	0	1	5	0	1	0	0
0	2.33	23.9	4.69	1.74	4.79	1.36	2	31	2	5	3	0	1	5	0	0	0	1
0	2.32	25.2	4.98	2.78	4.96	1.25	2	40	3	5	3	0	2	5	0	0	0	1
0	2.32	21.8	5.17	0.79	5.54	1.29	1	41	2	5	3	0	2	3	0	0	0	0
0	2.32	31.3	4.46	1.25	6.19	1.06	2	32	2	5	3	0	2	5	0	0	0	0
0	2.32	35.5	5.15	0.8	5.24	1.1	1	33	2	5	3	0	3	4	1	0	0	0
0	2.32	20.1	4.9	0.77	4.34	1.43	2	33	2	5	3	0	3	3	0	0	0	0
0	2.32	25.3	4.7	0.91	4.86	1.18	2	36	2	5	3	0	1	4	0	0	0	0
0	2.32	34.2	4.45	2.78	4.8	0.9	2	55	2	3	3	0	2	1	0	1	0	1
0	2.32	23.8	6.06	2.08	4.97	1.6	1	35	2	5	3	1	3	3	1	0	0	1
0	2.32	29.6	5.71	12.62	6.2	0.84	1	34	2	5	3	1	3	4	0	0	0	1
0	2.32	17.1	4.56	0.58	4.68	1.33	1	30	2	5	3	1	1	5	0	0	0	0
0	2.32	26	4.47	1.85	5.06	1.04	2	34	2	4	3	0	2	4	0	0	0	1
0	2.32	26.9	4.94	1.51	5.31	1.21	2	37	2	5	3	0	2	5	0	0	0	0
0	2.32	19.9	5.37	1.88	4.94	1.13	2	33	2	5	3	0	1	5	0	0	0	1
0	2.32	34.6	5.02	1.84	6.67	0.94	1	30	2	5	3	0	3	4	0	0	0	1
0	2.32	25.4	4.42	5.41	6.02	0.88	2	24	2	4	3	0	2	4	0	0	0	1
0	2.32	25.1	4.82	1.49	5.5	1.04	1	38	2	4	4	0	2	4	1	1	0	0
0	2.32	21.7	4.79	1.17	5.27	1.14	1	44	2	3	3	0	1	2	0	1	0	0
0	2.32	28.1	5.08	1.97	4.59	0.97	1	26	1	5	3	1	1	3	0	0	0	1
0	2.32	17.9	4.77	0.89	4.6	1.35	2	37	2	5	3	0	1	4	0	0	0	0
0	2.32	30.8	6.4	11.48	12.84	1.11	1	34	2	3	3	1	3	5	0	1	0	1
0	2.32	17.8	6.39	0.61	5.07	1.69	2	23	2	5	2	0	2	3	0	0	0	1
0	2.32	0	4.65	5.34	5.45	0.9	1	56	2	3	2	1	3	3	0	0	0	1
0	2.31	27.2	5.21	2.1	6.38	0.92	1	39	2	5	3	0	3	4	0	0	0	1
0	2.31	23.7	5.21	1.83	5.1	0.96	1	39	2	5	3	0	3	5	0	0	0	1
0	2.31	20.1	4.92	0.61	4.58	1.36	2	42	2	3	3	0	1	5	0	0	0	0
0	2.31	20.6	4.65	2.29	4.77	1.08	2	36	2	5	3	0	2	4	0	0	0	1
0	2.31	20	5.04	0.67	5.81	1.58	2	34	2	5	3	0	2	4	0	0	0	0
0	2.31	26.3	4.31	1.53	5.67	0.92	1	47	2	4	3	1	1	3	0	0	0	1
0	2.31	25.2	5.04	1.25	4.57	1.16	1	34	2	5	3	1	3	3	1	0	0	0
0	2.31	27.2	4.52	0.79	4.94	1.03	1	33	2	5	3	0	2	4	0	0	0	0
0	2.31	24	4.47	0.88	4.94	0.91	1	35	2	5	3	2	2	4	0	0	0	0
0	2.31	24	4.09	1.43	5.32	1.11	2	37	2	5	3	0	2	5	0	0	0	0
0	2.31	24.4	4.78	0.91	5.27	1.21	1	37	2	5	3	1	3	3	1	0	0	0
0	2.31	23.4	4.36	1	5.2	1.02	2	35	2	5	3	0	2	4	0	0	0	0
0	2.31	21	5.03	0.84	5.12	1.58	2	46	2	5	3	0	3	3	0	0	0	0
0	2.31	17.8	5.42	0.76	4.76	1.87	2	33	2	5	3	0	1	4	0	0	0	0
0	2.31	24.7	5.01	0.73	4.76	1.47	2	40	2	3	3	0	2	3	0	0	0	0
0	2.31	35.9	4.35	2.59	4.87	0.91	1	32	2	5	3	1	3	3	0	0	0	1
0	2.31	0	6.78	0.74	4.83	1.79	2	36	2	5	3	0	3	4	0	0	0	1
0	2.31	#NULL!	5.7	1.01	4.47	1.36	2	30	2	5	3	0	2	5	0	0	0	1
0	2.31	18.6	4.57	0.76	4.43	1.06	2	33	2	5	3	0	3	4	0	0	0	0
0	2.31	19.4	5.06	1.44	4.57	1.36	2	35	2	5	3	0	1	4	0	0	0	0
0	2.31	28.9	4.45	1.84	5.57	0.9	1	27	2	5	3	1	1	4	0	0	0	1
0	2.31	32.4	4.83	2.27	4.82	0.79	1	29	2	5	3	1	2	3	0	0	0	1
0	2.31	25.4	5.33	1.42	5.91	1.2	2	33	2	5	3	0	1	4	0	0	0	0
0	2.31	28.7	4.95	5.54	4.86	0.94	1	30	1	5	3	0	3	4	0	0	0	1
0	2.3	27.4	5.89	2.18	5.77	1.27	1	33	2	5	3	0	3	4	1	1	0	1
0	2.3	23.6	4.82	2.18	7.2	0.92	1	48	2	5	3	0	1	3	0	0	0	1
0	2.3	21.6	4.54	0.87	6.89	1.12	1	35	2	5	3	0	3	4	0	0	0	0
0	2.3	28.2	4.66	2.4	5.07	1.12	1	41	2	5	3	0	1	3	0	1	0	1
0	2.3	25.8	4.77	1	4.7	1.19	2	41	2	5	3	0	2	3	0	0	0	0
0	2.3	29.9	4.35	2	5.99	0.81	1	40	2	5	3	1	3	4	0	0	0	1
0	2.3	23.8	4.52	1.99	4.72	0.96	1	35	2	5	3	1	3	4	0	0	0	1
0	2.3	#NULL!	4.54	1.94	4.94	0.89	1	36	2	5	3	0	2	3	0	1	0	1
0	2.3	29.5	4.97	2.32	5.84	1.09	1	43	2	5	3	0	2	4	1	1	0	1
0	2.3	26.6	4.7	4.55	5.3	0.87	1	38	2	5	3	1	3	3	0	1	0	1
0	2.3	31.2	4.92	0.99	5.03	1.25	2	33	2	5	3	0	3	3	0	0	0	0
0	2.3	30.4	5.32	2.57	5.59	1.05	2	41	2	4	2	0	3	4	0	1	0	1
0	2.3	23.9	5.52	1	5.66	1.32	1	39	2	5	3	0	2	4	1	1	0	0
0	2.3	31.8	4.87	4.77	4.99	0.93	1	30	2	5	3	0	3	4	0	1	0	1
0	2.3	22.9	4.95	0.86	4.44	1.39	1	30	2	5	3	0	3	3	0	0	0	0
0	2.3	21.6	4.58	0.94	5.88	1.24	2	31	2	5	3	0	2	4	0	0	0	0
0	2.3	22.7	5.06	1.48	5.03	1.16	1	26	1	5	3	0	1	5	0	0	0	0
0	2.3	26.2	4.61	2.84	5.78	1.04	1	34	2	3	4	1	2	2	1	1	0	1
0	2.3	18.4	5.18	0.6	4.62	1.57	2	27	1	5	3	0	1	3	0	0	0	0
0	2.3	25.7	4.58	3.58	5.21	0.92	1	33	2	5	5	0	3	5	0	0	0	1
0	2.3	30.7	5.28	1.86	4.45	0.91	1	21	1	5	3	0	1	4	0	0	0	1
0	2.3	0	4.57	1.37	4.46	1.02	1	20	1	5	3	1	2	4	1	0	0	0
0	2.29	21.1	5.07	1.21	5.22	1.37	2	41	2	5	3	0	3	3	0	0	0	0
0	2.29	33.9	4.93	1.86	5.32	1.04	1	38	2	5	3	0	3	2	1	0	0	1
0	2.29	25.7	4.57	2.52	4.71	0.91	2	32	2	5	3	0	1	3	0	0	0	1
0	2.29	26.2	4.48	1.95	4.97	0.99	1	38	2	5	3	1	2	2	1	0	0	1
0	2.29	20.8	4.91	1	4.7	1.39	2	37	2	5	3	0	2	4	0	0	0	0
0	2.29	24.9	5.32	1.09	4.94	1.37	1	38	2	5	3	0	1	3	1	0	0	0
0	2.29	26	4.98	1.02	4.78	1.11	1	39	2	5	5	0	1	4	1	0	0	0
0	2.29	21.7	4.63	1.94	4.89	1.01	1	35	2	5	3	1	2	3	0	0	0	1
0	2.29	24.3	5.56	3.73	5.54	1.23	1	34	2	5	3	0	3	5	1	0	0	1
0	2.29	30.8	5.62	4.75	5.49	0.9	1	44	2	5	3	1	3	5	0	0	0	1
0	2.29	30.4	5	3.67	5.58	0.9	1	33	2	5	3	0	2	4	0	1	0	1
0	2.29	22.3	5.98	7.58	5.07	0.99	1	30	2	5	4	0	3	3	0	0	0	1
0	2.29	22.4	5.11	1.01	5.81	1.28	2	32	2	99	3	0	1	5	0	0	0	0
0	2.29	32.1	4.65	2.63	5.29	1.05	2	33	2	5	3	0	1	5	0	0	0	1
0	2.29	26.5	4.6	3.93	4.65	0.93	1	37	2	5	3	1	1	2	1	0	0	1
0	2.28	22.7	4.47	0.87	4.61	1.15	2	35	2	5	3	0	2	4	0	0	0	0
0	2.28	21.5	5.35	0.74	4.74	1.62	2	38	2	3	3	0	1	2	0	0	0	0
0	2.28	18.2	4.86	1.1	5.1	1.35	2	48	2	5	3	0	1	3	0	0	0	0
0	2.28	24.1	5.84	10.52	5.36	0.93	1	34	2	5	3	1	2	4	0	1	0	1
0	2.28	19.1	4.74	1.26	5	1.13	1	37	2	5	3	0	1	4	0	0	0	0
0	2.28	26.8	4.63	1.55	5.01	0.98	1	40	2	5	3	0	2	4	1	1	0	1
0	2.28	26.4	4.91	2.24	5.47	0.99	1	37	2	5	3	0	2	3	0	0	0	1
0	2.28	26.9	4.45	2.4	5.15	0.9	1	44	2	5	5	1	2	2	1	1	0	1
0	2.28	0	5.16	1.48	5.5	1.17	2	32	2	5	3	0	1	4	0	0	0	0
0	2.28	25.2	4.2	5.1	5.32	0.82	1	34	2	5	3	0	1	4	1	0	0	1
0	2.28	22	5.64	0.93	5.1	1.33	2	29	2	5	3	0	1	4	0	0	0	0
0	2.28	21.5	5.39	0.93	5.3	1.35	2	30	2	5	3	0	2	5	0	0	0	0
0	2.28	0	5.73	0.83	5.45	1.9	1	55	2	2	2	1	2	3	1	0	0	1
0	2.27	30	5.2	1.74	5.57	1.06	1	37	2	5	3	0	3	4	0	1	0	1
0	2.27	26.3	5.21	1.5	6.62	1.19	1	36	2	5	3	1	2	4	1	0	0	0
0	2.27	26.7	4.57	5.14	5.7	0.89	2	36	2	5	3	0	2	5	0	0	0	1
0	2.27	19.1	4.33	1.56	5.2	1	1	41	2	5	3	1	2	4	1	0	0	0
0	2.27	24	4.57	1.7	4.97	1.15	2	42	2	5	3	0	2	3	0	0	0	1
0	2.27	29.2	4.45	1	5.04	1.11	1	41	2	5	3	1	2	4	0	0	0	0
0	2.27	30	6.07	7.37	17.1	1.14	2	41	2	5	3	0	2	2	0	1	0	1
0	2.27	21.2	6.37	2.04	5.14	1.37	2	41	2	5	3	0	1	3	0	0	0	1
0	2.27	20.6	5.1	1.11	4.82	1.57	2	50	2	5	3	0	1	4	0	0	0	0
0	2.27	27	4.58	1.68	4.98	0.98	2	40	2	5	3	0	2	4	0	0	0	0
0	2.27	#NULL!	4.44	4.38	4.84	0.81	1	34	2	5	3	1	2	4	0	1	0	1
0	2.27	22.6	5.24	0.94	4.67	1.37	2	35	2	5	3	0	2	4	0	0	0	0
0	2.27	24	5.23	0.9	5.08	1.14	1	52	2	5	2	0	2	4	0	0	0	0
0	2.27	18.6	5.75	0.95	5.03	1.65	2	63	2	4	2	0	1	4	0	0	0	1
0	2.27	19.4	6.28	1.01	5.84	1.83	2	40	2	5	3	0	2	2	0	0	0	1
0	2.27	23.1	4.46	1.95	5.03	1.05	1	35	2	5	3	2	1	4	0	0	0	1
0	2.27	19	5.17	0.65	4.5	1.59	2	28	1	4	2	0	2	2	0	0	0	0
0	2.27	19.9	4.56	1.2	4.88	1.17	1	29	2	5	3	1	3	4	0	0	0	0
0	2.27	20.8	4.72	0.94	5.12	1.11	2	38	2	3	3	0	2	4	0	0	0	0
0	2.27	29.4	4.91	1.69	4.9	1.1	1	27	1	5	3	1	2	3	0	1	0	0
0	2.26	24.6	5.13	2.11	5.14	1.18	1	38	2	5	3	1	1	3	0	0	0	1
0	2.26	22.1	5.22	2.83	5.35	1	1	36	2	5	3	0	3	3	0	0	0	1
0	2.26	21.5	5.02	0.8	4.93	1.44	2	31	2	5	3	0	2	4	0	0	0	0
0	2.26	28.8	4.48	2.37	4.74	0.88	1	33	2	5	3	1	2	3	0	0	0	1
0	2.26	26.7	4.88	1.3	4.82	1.05	1	34	2	5	3	0	1	4	1	0	0	0
0	2.26	21.9	5.03	1.47	5.77	1.02	1	36	2	5	3	1	3	2	1	0	0	0
0	2.26	27.2	4.72	0.99	5.4	1.21	2	65	2	3	3	0	1	2	0	0	0	0
0	2.26	27.5	5.01	1.41	5.62	0.79	1	35	2	5	3	0	2	5	0	0	0	0
0	2.26	30.1	4.38	1.36	5.42	1.1	2	29	2	5	3	0	3	4	0	1	0	0
0	2.26	25.9	4.48	1.58	4.55	0.92	1	31	2	5	3	2	2	4	1	0	0	0
0	2.25	24.6	5.09	1.98	4.97	1.36	2	43	2	4	3	0	2	2	0	0	0	1
0	2.25	23.4	5.16	2.1	5.21	1.03	1	35	2	5	3	0	2	5	0	0	0	1
0	2.25	22.5	4.8	1.66	5.66	0.97	2	34	2	4	3	0	2	4	0	0	0	0
0	2.25	25.9	4.74	1.6	5.09	0.88	1	37	2	5	3	1	2	3	1	0	0	0
0	2.25	27.8	5.77	3.05	5.42	1.09	1	33	2	5	3	1	3	2	1	0	0	1
0	2.25	27.8	5.77	3.05	5.42	1.09	1	33	2	5	3	1	3	2	1	0	0	1
0	2.25	23.6	4.37	1.16	5	0.97	2	42	2	5	3	0	2	4	0	0	0	0
0	2.25	27.1	4.36	1.97	5.93	0.81	1	34	2	5	3	0	2	4	1	0	0	1
0	2.25	30.4	4.41	1.9	4.09	1.04	1	33	2	5	3	0	1	3	0	1	0	1
0	2.25	24.3	4.33	0.81	4.51	0.85	1	34	2	5	3	0	2	4	0	0	0	0
0	2.25	24.4	6.48	1.54	5.31	1.31	1	32	2	5	3	0	2	4	0	0	0	1
0	2.25	23.6	4.36	1.03	5.26	1.02	1	34	2	5	3	1	2	3	0	0	0	0
0	2.25	23.6	4.36	1.03	5.26	1.02	1	34	2	5	3	1	2	3	0	0	0	0
0	2.25	24.2	4.96	1.12	4.66	1.25	2	40	2	5	3	0	2	4	0	0	0	0
0	2.25	22.1	4.34	3.48	4.28	0.85	1	39	2	4	3	1	3	3	1	0	0	1
0	2.25	23.3	4.92	1.12	4.81	1.45	2	30	2	5	3	0	2	3	0	0	0	0
0	2.25	0	4.96	1.23	4.77	0.98	2	28	2	5	3	0	2	4	0	0	0	0
0	2.25	22	4.95	1.12	5.22	1.55	2	28	2	5	3	0	2	4	0	0	0	0
0	2.24	20.2	4.17	1.06	4.44	0.84	1	36	2	5	3	0	1	5	0	0	0	0
0	2.24	28.9	5.29	5.52	6.4	1.08	1	34	2	5	3	0	3	3	0	0	0	1
0	2.24	23	4.29	0.67	4.97	0.95	2	35	2	5	3	0	1	5	0	0	0	0
0	2.24	23.6	4.54	0.7	5.02	1.12	2	39	2	5	4	0	2	4	0	1	0	0
0	2.24	19	4.9	0.48	4.52	1.42	2	36	2	5	4	0	2	3	0	0	0	0
0	2.24	26.8	5.07	1.59	5.41	1.07	1	33	2	5	4	0	2	3	0	0	0	0
0	2.24	20.6	4.29	1.61	5.36	0.87	2	56	2	4	3	0	2	4	0	0	0	0
0	2.24	27.6	4.87	3.47	5.9	1.03	1	36	2	4	3	1	1	3	0	1	0	1
0	2.24	23.9	4.62	1.19	5.43	1.27	1	32	2	5	3	0	2	3	0	0	0	0
0	2.24	25.9	5.44	6.59	6.21	1.1	1	36	2	5	3	0	3	3	1	1	0	1
0	2.24	28.2	4.53	2.1	5.75	0.82	1	33	2	5	3	1	3	4	0	1	0	1
0	2.24	21.9	4.79	1.13	5.54	1.11	2	43	2	5	3	0	3	2	0	0	0	0
0	2.24	#NULL!	4.64	1.75	5.08	0.96	2	29	1	5	3	0	2	2	0	0	0	1
0	2.24	23.8	4.95	1.77	4.99	0.97	1	42	2	4	3	1	2	4	0	0	0	1
0	2.24	19.5	5.73	1.3	6.17	1.63	2	38	2	5	2	0	2	3	0	0	0	1
0	2.24	24.4	5.23	1.78	5.83	1.12	1	46	2	3	2	1	3	4	1	0	0	1
0	2.24	21.2	4.48	0.86	5.66	1.15	2	24	1	5	3	0	3	4	0	0	0	0
0	2.24	0	4.4	1.77	4.43	1.01	1	51	2	4	3	0	3	3	0	1	0	1
0	2.23	27.8	4.93	1.99	4.69	1.22	1	37	2	5	3	0	2	3	0	0	0	1
0	2.23	22.9	4.3	1.99	4.56	0.93	1	35	2	5	3	0	2	5	1	0	0	1
0	2.23	21.4	4.51	0.5	5.32	1.26	2	41	2	5	3	0	2	5	0	0	0	0
0	2.23	20.8	4.68	1.1	5.3	1.15	1	32	2	5	3	0	3	3	0	0	0	0
0	2.23	26.3	4.16	1.4	5.25	0.84	1	34	2	5	3	1	1	3	0	0	0	0
0	2.23	22.4	4.49	1.13	4.76	1.04	1	34	2	5	3	0	3	4	0	0	0	0
0	2.23	25.3	5.94	1.27	4.87	1.44	2	43	2	5	3	0	2	3	0	0	0	1
0	2.23	23.4	4.97	0.77	5.2	1.17	1	51	2	4	3	1	2	3	0	0	0	0
0	2.23	28.1	5.56	3.85	5.32	1.16	1	37	2	5	3	1	2	4	0	0	0	1
0	2.23	25.3	4.9	1.94	5	1.1	1	30	2	4	3	0	2	4	0	0	0	1
0	2.23	22.8	4.92	1.5	5.11	1.13	2	37	2	5	3	0	2	4	0	0	0	0
0	2.23	25.4	4.43	0.77	5.55	0.87	1	59	2	5	3	2	2	3	1	1	0	0
0	2.23	21.2	5.03	1.02	5.46	1.61	2	35	2	5	3	0	2	4	0	0	0	0
0	2.23	31.6	4.33	2.06	5.32	0.86	1	44	2	4	3	1	1	2	0	1	0	1
0	2.23	21.2	5.02	1.38	4.94	1.2	2	31	2	4	3	0	1	3	0	0	0	0
0	2.23	23.3	4.51	1.56	4.75	0.94	2	29	2	5	3	0	2	5	0	0	0	0
0	2.23	21.3	4.84	0.75	4.72	1.34	2	30	2	5	3	0	2	3	0	0	0	0
0	2.23	28.3	4.46	0.95	4.71	1.13	2	29	2	4	3	0	3	5	0	0	0	0
0	2.23	21.9	6.13	1.36	4.65	1.18	2	33	2	5	3	0	2	4	0	0	0	1
0	2.22	29.1	4.87	1.15	5.32	1.07	1	39	2	5	3	0	2	4	0	0	0	0
0	2.22	25.3	4.97	2.55	4.95	0.81	1	56	2	4	3	1	2	3	0	0	0	1
0	2.22	25.9	5.78	1.01	4.97	1.55	2	39	2	5	3	0	2	3	0	0	0	1
0	2.22	0	5.06	1	5.3	0.9	2	39	2	5	3	0	3	3	0	0	0	0
0	2.22	25.6	5.35	3.31	5.4	1.42	1	32	2	5	3	0	2	5	1	0	0	1
0	2.22	25	4.5	0.92	5.14	1.15	2	37	2	5	3	0	2	4	0	0	0	0
0	2.22	22.9	5.12	0.95	5.66	1.72	2	36	2	5	3	0	1	3	0	0	0	0
0	2.22	31.9	5.01	2.04	5.16	0.97	1	30	2	5	3	1	2	5	0	0	0	1
0	2.22	22.9	4.63	0.81	5.17	0.95	2	32	2	5	3	0	2	2	0	0	0	0
0	2.22	22.7	6.41	1.11	4.57	1.37	2	31	2	5	3	0	3	5	0	0	0	1
0	2.22	25.3	5.26	1.42	5.07	1.01	1	41	2	5	3	2	3	4	1	0	0	0
0	2.21	0	5.75	1.02	6.17	1.67	2	33	2	4	3	0	2	3	0	0	0	1
0	2.21	21.7	4.5	1.22	5.24	1.19	2	42	2	5	3	0	1	4	0	0	0	0
0	2.21	21.3	4.6	0.77	5.14	1.3	1	36	2	5	3	0	2	4	0	0	0	0
0	2.21	23.1	5.01	2.65	4.92	0.91	1	35	2	5	3	0	2	4	0	0	0	1
0	2.21	25.7	4.16	1.98	5.14	0.88	1	34	2	5	3	1	2	4	0	0	0	1
0	2.21	24.3	4.84	0.74	5.12	1.25	1	33	2	5	3	0	1	4	0	0	0	0
0	2.21	25.3	5.21	0.55	5.5	1.94	2	35	2	5	3	0	2	4	0	0	0	0
0	2.21	25.2	4.7	0.87	5.73	1.15	2	39	2	5	2	0	1	3	0	0	0	0
0	2.21	25.7	4.24	0.93	5.53	1.09	1	35	2	3	3	0	2	5	1	1	0	0
0	2.21	27	4.5	0.97	5.58	1.1	1	36	2	5	3	1	2	3	0	1	0	0
0	2.21	34.1	4.36	2.23	4.85	0.99	2	43	2	5	3	0	2	4	0	0	0	1
0	2.21	25	5.42	1.83	6.26	1.42	1	31	2	5	3	1	2	4	0	0	0	1
0	2.21	20.9	4.9	1.97	4.51	1.39	1	34	2	5	3	1	3	2	1	0	0	1
0	2.21	31.5	4.35	1.24	4.79	0.94	2	35	2	5	3	0	2	5	0	0	0	0
0	2.21	22	4.8	1.2	5.92	1.31	1	35	2	5	3	1	1	4	0	0	0	0
0	2.21	19.4	5.33	1.11	4.87	1.81	2	35	2	5	3	0	2	5	0	0	0	0
0	2.21	39.8	5.43	1.83	5.48	0.9	1	27	2	5	3	1	3	5	1	0	0	1
0	2.21	24.5	4.75	0.57	4.78	1.27	1	26	2	5	3	0	3	5	1	1	0	0
0	2.2	27.6	6.91	1.42	5.72	1.22	2	41	2	3	3	0	1	4	0	0	0	1
0	2.2	25.4	4.91	1.27	4.79	1.4	2	41	2	5	3	0	2	4	0	0	0	0
0	2.2	24.7	5.46	1.68	5.22	1.26	2	44	2	5	3	0	1	4	0	0	0	0
0	2.2	22.7	4.7	0.64	4.7	1.34	2	38	2	4	3	0	2	4	0	0	0	0
0	2.2	21.4	4.61	0.61	6.22	1.35	2	35	2	5	3	0	3	3	0	0	0	0
0	2.2	25.8	5.75	2.55	5.61	1.04	1	40	1	5	3	0	2	4	0	0	0	1
0	2.2	32.1	4.57	3.62	6.23	0.92	1	32	2	5	3	1	1	4	0	0	0	1
0	2.2	25.2	5.86	1.92	4.98	0.96	1	33	2	5	3	1	1	3	0	1	0	1
0	2.2	30.7	4.6	1.83	4.65	0.9	1	40	2	5	4	1	2	3	0	1	0	1
0	2.2	21.8	5.57	1.34	6.25	1.05	2	40	2	5	3	0	3	4	0	0	0	0
0	2.2	29.3	4.36	2.05	5.13	1.05	1	29	2	5	3	1	2	3	0	0	0	1
0	2.2	22.6	4.64	0.61	5.05	1.35	1	34	2	5	3	0	2	3	0	0	0	0
0	2.2	23.9	5.48	1.59	5.24	1.24	2	44	2	5	3	0	2	4	0	0	0	0
0	2.2	0	4.69	0.8	5.39	1.32	2	30	2	5	3	0	2	3	0	0	0	0
0	2.2	25	6.01	1.88	5.64	1.43	1	47	2	3	3	1	3	3	1	0	0	1
0	2.2	25.5	5.42	0.83	4.91	1.14	1	54	2	3	3	0	2	4	1	0	0	0
0	2.19	0	4.39	1.07	5.19	0.99	1	46	2	4	3	0	2	3	0	0	0	0
0	2.19	17.9	4.91	1.24	4.64	1.28	2	37	2	5	3	0	2	3	0	0	0	0
0	2.19	24.6	4.48	1.84	5.12	1.18	2	39	2	5	3	0	3	4	0	0	0	1
0	2.19	28.5	5.13	4.63	4.24	1.39	2	34	2	5	3	0	2	5	0	0	0	1
0	2.19	20.3	4.79	2.67	4.87	1.17	2	41	2	5	3	0	2	3	0	0	0	1
0	2.19	23	4.6	1.09	4.9	1.18	1	43	2	5	3	0	2	4	0	0	0	0
0	2.19	25.4	4.88	1.98	6.01	1.36	1	34	2	5	3	1	1	4	0	0	0	1
0	2.19	0	5.07	1.92	4.9	1.06	1	40	2	5	3	0	2	5	0	0	0	1
0	2.19	24.6	4.66	2.22	5.34	1.1	2	43	2	5	3	0	3	3	0	0	0	1
0	2.19	22.4	5.06	1.31	4.9	1.38	2	39	2	5	3	0	1	4	0	1	0	0
0	2.19	28.1	4.12	2.57	5.64	0.86	1	36	2	5	3	0	2	5	0	0	0	1
0	2.19	26.4	4.71	1.52	5.08	1.03	1	34	2	5	3	0	3	4	1	0	0	0
0	2.19	18.5	4.7	1.07	4.16	1.29	2	29	2	5	2	0	1	3	#NULL!	0	0	0
0	2.19	16.8	3.9	0.68	4.47	1.06	1	28	1	5	3	1	3	4	0	0	0	0
0	2.19	23.7	5.85	0.92	4.84	1.55	1	27	1	5	3	0	2	4	1	0	0	1
0	2.19	25.3	4.39	0.78	4.36	1.15	1	27	2	5	3	1	2	3	1	0	0	0
0	2.19	21.2	4.38	0.5	4.81	1.16	1	38	2	3	3	1	2	4	0	1	0	0
0	2.19	22.3	6.41	0.64	5.55	1.51	2	41	2	4	3	0	2	4	0	0	0	1
0	2.19	0	4.42	1.94	4.44	0.89	1	22	1	5	2	1	2	3	0	0	0	1
0	2.19	0	4.38	2.03	5.07	0.99	1	52	2	3	2	0	2	4	0	0	0	1
0	2.18	26.2	4.86	0.69	5.33	1.69	2	38	2	5	3	0	1	4	0	0	0	0
0	2.18	24.8	4.37	1.34	4.89	0.93	2	33	2	5	3	0	1	4	0	0	0	0
0	2.18	28.1	4.42	3.09	5.11	0.85	1	43	2	5	3	1	2	4	1	0	0	1
0	2.18	19.9	4.73	1.34	4.51	1.25	2	33	2	5	4	0	1	4	0	0	0	0
0	2.18	26	4.86	0.85	5.71	1.25	1	34	2	5	3	0	2	4	0	0	0	0
0	2.18	23.5	4.64	2.26	5.04	1.09	2	32	2	5	3	0	2	3	0	0	0	1
0	2.18	23.7	4.6	0.9	5.34	1.14	2	34	2	5	3	0	1	4	0	0	0	0
0	2.18	27.9	5.17	2.22	5.06	1.03	1	39	2	5	3	1	2	4	1	0	0	1
0	2.18	19.6	4.89	0.83	5.14	1.54	2	37	2	5	3	0	3	3	0	0	0	0
0	2.18	24.5	4.52	1.07	5.19	1.05	2	35	2	5	3	0	1	3	0	0	0	0
0	2.18	19	4.41	1	4.87	1.13	2	32	2	5	3	0	2	4	0	0	0	0
0	2.18	36.8	4.22	2.59	5.43	0.9	1	70	2	3	3	2	1	2	0	1	0	1
0	2.18	30.8	4.5	1.3	4.27	1.16	2	39	2	5	3	0	2	4	0	0	0	0
0	2.18	30.5	4.65	0.9	5.3	0.96	1	32	2	5	3	0	3	4	0	1	0	0
0	2.18	24.3	5.56	2.05	5.3	1.31	2	32	2	5	3	0	1	4	0	0	0	1
0	2.18	20.9	4.65	0.91	5.12	1.39	2	35	2	5	3	0	2	4	0	0	0	0
0	2.17	19.5	4.77	0.95	4.74	1.25	2	37	2	5	3	0	2	4	0	0	0	0
0	2.17	23.9	5.45	1.54	4.74	1.01	1	38	2	5	3	0	2	4	0	0	0	0
0	2.17	28.1	5.59	1.57	5.78	1.12	1	35	2	5	3	1	2	4	1	0	0	0
0	2.17	24.6	4.72	0.8	4.96	1.28	2	42	2	5	3	0	2	3	0	0	0	0
0	2.17	25.7	6.15	1.63	5.62	1.23	1	35	2	5	3	1	3	4	0	0	0	1
0	2.17	22.3	4.82	3.8	5.1	1.13	2	39	2	5	3	0	1	3	0	0	0	1
0	2.17	23.9	4.44	0.73	5.65	1.06	2	38	2	5	3	0	1	3	0	0	0	0
0	2.17	22	4.49	0.97	4.81	1.23	2	44	2	5	4	0	3	4	0	0	0	0
0	2.17	17.8	4.5	1.28	4.4	1.1	2	35	2	5	3	0	2	5	0	1	0	0
0	2.17	22.9	4.59	0.73	5.4	1.29	2	30	2	4	3	0	2	4	0	0	0	0
0	2.17	23.7	5.34	1.24	4.53	1.46	2	36	2	5	3	0	2	2	0	0	0	0
0	2.17	24.4	4.34	1.01	5.2	0.93	1	32	2	5	3	0	2	#NULL!	0	0	0	0
0	2.17	26.3	4.2	3.59	5.29	0.83	2	35	2	5	3	0	2	4	0	0	0	1
0	2.17	24.7	4.89	1.25	5.18	1.36	1	30	2	5	3	0	2	4	0	0	0	0
0	2.17	19.9	4.52	0.58	5.19	1.18	2	34	2	5	3	0	2	4	0	0	0	0
0	2.17	24.7	4.53	1.24	4.78	0.98	2	30	2	5	3	0	2	5	0	0	0	0
0	2.16	28.4	5.84	1.54	5.03	1.54	1	36	2	5	3	1	2	3	1	0	0	1
0	2.16	25.7	5.06	2.09	6.57	0.95	1	37	2	5	3	1	2	4	0	1	0	1
0	2.16	26.2	5.03	0.58	5.15	1.07	1	38	2	5	3	0	1	4	0	0	0	0
0	2.16	25.3	4.86	0.96	4.98	0.98	2	38	2	5	3	0	2	4	0	0	0	0
0	2.16	24	6.42	2.05	4.73	1.69	2	48	2	5	3	0	2	3	0	0	0	1
0	2.16	20.7	4.57	1.42	4.44	1.2	2	39	2	5	2	0	2	4	0	0	0	0
0	2.16	22.4	4.89	0.96	5.18	1.08	2	36	2	5	3	0	2	4	0	0	0	0
0	2.16	19.3	5.52	1.54	4.99	2.07	2	36	2	4	3	0	3	3	0	0	0	0
0	2.16	24.8	4.72	2.12	4.46	1.13	1	36	2	5	3	1	3	3	1	0	0	1
0	2.16	22.5	4.29	0.62	5.34	1.03	2	38	2	5	3	0	2	5	0	0	0	0
0	2.16	21.2	4.75	1.4	4.88	1.33	2	42	2	5	3	0	2	4	0	0	0	0
0	2.16	29.4	4.46	1.82	5.47	1.04	1	32	2	5	3	0	3	4	1	0	0	1
0	2.16	17.8	4.75	1.11	4.72	1.2	2	33	2	5	3	0	1	4	0	0	0	0
0	2.15	22	4.68	1.04	5.2	1.21	2	38	2	5	3	0	2	5	0	0	0	0
0	2.15	27	4.4	2.73	5.37	1.04	1	40	2	5	3	1	1	3	0	0	0	1
0	2.15	25.1	4.66	2.64	7.19	0.96	1	39	2	5	3	0	3	4	0	0	1	1
0	2.15	18.2	4.87	1.22	4.9	1.46	2	33	2	5	3	0	1	4	0	0	0	0
0	2.15	21.3	4.86	0.44	5.23	1.72	1	32	2	5	3	0	2	3	0	0	0	0
0	2.15	27.1	4.31	1.99	6.52	0.94	1	38	2	4	3	0	3	4	0	1	0	1
0	2.15	24.3	4.22	0.75	5.02	0.96	1	33	2	5	3	1	2	3	0	0	0	0
0	2.15	24.6	6.89	1.81	5.62	1.34	1	41	2	5	3	0	1	4	0	0	0	1
0	2.15	19.5	4.47	0.92	4.84	1.13	2	41	2	4	3	0	1	3	0	0	0	0
0	2.15	28.5	4.12	1.11	5.39	1	1	33	2	5	3	1	3	3	0	0	0	0
0	2.15	25.4	5.25	5.07	7.13	1	1	73	2	2	2	1	3	3	0	1	0	1
0	2.15	24.6	4.08	1.5	5.35	0.84	2	34	2	5	3	0	2	3	0	0	0	0
0	2.15	21.8	4.07	1.62	5.07	0.75	1	38	2	3	3	1	2	4	1	1	0	0
0	2.15	23.6	4.59	1.82	6	1.16	1	32	2	5	3	0	1	4	0	0	0	1
0	2.15	26.1	5.31	3.66	4.97	0.9	1	30	1	5	3	1	1	3	0	0	0	1
0	2.15	20.1	5.68	1.14	5.33	1.46	2	35	2	5	3	0	2	4	0	0	0	0
0	2.15	21.4	4.5	1.2	4.84	1.19	2	32	2	5	3	0	2	3	0	0	0	0
0	2.14	24.8	4.2	1.17	4.62	1.17	2	40	2	5	3	0	2	4	0	0	0	0
0	2.14	16.9	4.68	1.35	4.46	1.16	2	38	2	5	3	0	2	4	0	0	0	0
0	2.14	18.3	4.87	1.08	5.05	1.72	2	42	2	5	3	0	1	4	0	0	0	0
0	2.14	19.9	4.89	1.08	6.16	1.57	2	30	2	3	3	0	2	5	0	0	0	0
0	2.14	20.9	4.99	1.09	4.98	1.57	2	41	2	5	3	0	1	4	0	0	0	0
0	2.14	27.2	6.52	1.8	5.85	1.21	1	34	2	5	3	1	2	3	0	0	0	1
0	2.14	27.2	4.66	0.64	5	1.25	2	37	2	5	3	0	2	5	0	0	0	0
0	2.14	23.2	5.05	1.01	4.93	1.41	1	36	2	5	3	0	1	3	1	0	0	0
0	2.14	30	4.13	2.43	4.77	0.83	1	35	2	4	3	1	2	4	0	0	0	1
0	2.14	17.4	5.3	1.25	5.1	1.29	2	40	2	5	3	0	1	5	0	0	0	0
0	2.14	31.7	6.33	7.33	5.7	1.1	1	41	2	5	3	0	1	4	1	1	0	1
0	2.14	24.7	4.2	2	4.99	0.91	2	34	2	5	3	0	3	4	0	0	0	1
0	2.14	23.1	4.95	0.73	4.38	1.54	2	33	2	5	3	0	1	4	0	0	0	0
0	2.14	0	5.67	1.72	5.44	0.97	2	30	2	5	3	0	2	4	0	0	0	1
0	2.14	21	4.41	1.65	4.7	1.05	2	32	2	5	3	0	2	5	0	0	0	0
0	2.14	24.4	5.37	2.36	5.15	1.14	1	36	2	5	3	0	2	3	0	0	0	1
0	2.14	30.2	4.81	2.09	5.48	0.89	1	27	1	5	3	1	2	4	0	0	0	1
0	2.14	24.5	5.35	1.47	8.16	1.26	1	55	2	3	3	1	2	5	0	0	1	1
0	2.14	0	4.34	2.01	5.12	0.87	1	37	2	3	3	0	1	4	1	0	0	1
0	2.13	21	4.76	1.13	4.91	1.18	2	39	2	5	3	0	2	4	0	0	0	0
0	2.13	23.6	4.57	0.83	5.03	1.26	1	35	2	5	3	0	1	4	0	0	0	0
0	2.13	26.4	4.04	1.11	5.75	0.83	1	35	2	5	3	1	2	4	0	0	0	0
0	2.13	32.3	4.87	2.81	5.62	0.83	1	35	2	5	3	1	2	4	0	1	0	1
0	2.13	21.6	4.58	0.65	4.55	1.27	2	33	2	5	3	0	1	5	0	0	0	0
0	2.13	22.9	4.22	0.97	5.78	1.11	2	44	2	5	3	0	1	3	0	0	0	0
0	2.13	29.2	6.01	3.46	4.88	1.05	1	41	3	5	3	1	2	6	1	0	0	1
0	2.13	26.4	5.09	2.17	5.64	1.11	1	41	2	5	3	1	2	3	1	1	0	1
0	2.13	31.9	4.05	1.27	5.38	0.76	1	38	2	5	3	0	1	4	1	0	0	0
0	2.13	23	5.88	3.67	4.92	1.06	1	33	2	3	3	1	1	4	0	0	0	1
0	2.13	19.3	4.57	0.4	4.43	1.3	2	31	2	5	3	0	1	5	0	0	0	0
0	2.13	21.9	4.76	0.88	5.27	0.98	1	28	2	5	2	1	2	5	0	0	0	0
0	2.13	28.9	5.34	2.5	4.7	1.02	1	26	2	5	3	1	2	5	1	0	0	1
0	2.13	20.2	5.2	0.99	5.37	1.62	2	34	2	5	3	0	1	3	0	0	0	0
0	2.13	25.2	4.72	2.92	5.85	0.97	1	31	2	4	3	1	1	5	1	0	0	1
0	2.13	18.1	5.33	0.65	4.72	1.51	1	30	2	5	3	1	3	4	1	0	0	0
0	2.12	27.4	4.57	0.87	5.78	1.18	1	40	2	5	3	0	3	5	0	1	0	0
0	2.12	23.4	4.36	1.69	4.68	0.95	2	36	2	5	4	0	1	4	0	0	0	0
0	2.12	24	4.15	1.23	5.49	0.86	1	38	2	4	3	1	2	3	0	0	0	0
0	2.12	27.2	6.5	3.17	5.4	1.14	1	34	2	5	3	1	3	4	0	1	0	1
0	2.12	25.8	4.54	2.54	5.1	1	1	38	2	5	3	0	2	4	0	0	0	1
0	2.12	22.1	4.47	1.62	4.87	1.18	2	40	2	4	3	0	2	4	0	0	0	0
0	2.12	24.8	4.36	2.05	5.11	1.02	1	35	2	5	3	1	3	4	0	0	0	1
0	2.12	22	6.68	0.6	5.05	2.25	2	36	2	5	3	0	1	4	0	0	0	1
0	2.12	26.9	4.19	3.32	6.8	0.89	1	37	2	5	3	0	2	4	0	0	0	1
0	2.12	24.4	4.35	1.01	5.25	0.99	1	32	2	5	3	0	1	4	0	0	0	0
0	2.12	21.6	4.12	0.49	4.67	1.13	2	33	2	5	3	0	2	5	0	0	0	0
0	2.12	21.5	4.61	1.89	5.34	1.12	2	32	2	5	3	0	1	4	0	0	0	1
0	2.12	27.6	5.44	3.09	6.32	0.9	1	33	2	5	3	1	3	2	0	0	0	1
0	2.12	18.4	4.36	0.56	4.47	1.18	2	34	2	4	3	0	2	3	0	0	0	0
0	2.12	21.6	4.23	0.65	5.44	0.99	2	29	2	5	3	0	2	4	0	0	0	0
0	2.12	25	5.48	1.45	5.47	1.15	1	30	2	5	3	1	3	3	1	0	0	0
0	2.12	26	4.55	1.36	5.11	1.17	1	29	2	5	3	0	1	4	1	0	0	0
0	2.12	18.2	5.13	0.74	5.86	1.17	1	51	2	3	3	0	3	4	0	1	0	0
0	2.12	31.5	5.05	1.5	5.44	1.2	1	35	2	5	3	0	1	5	0	0	0	0
0	2.12	0	6.18	9.76	5.04	1.19	1	29	2	5	3	1	1	4	0	0	0	1
0	2.11	27.7	4.21	3.11	5.95	0.97	1	30	2	5	3	1	3	4	0	0	0	1
0	2.11	26.1	4.12	1.24	5.11	0.94	1	38	2	5	3	1	2	4	0	0	0	0
0	2.11	25.6	4.7	1.1	4.63	1.27	1	36	2	5	3	1	2	4	0	1	0	0
0	2.11	28.8	4.12	2.76	6.03	0.86	1	43	2	5	3	1	1	4	1	1	0	1
0	2.11	20.6	4.16	0.92	4.58	1.08	1	33	2	5	3	0	2	3	0	0	0	0
0	2.11	25.5	4.35	1.87	4.98	0.94	1	36	2	5	3	0	3	4	0	0	0	1
0	2.11	26.1	4.2	0.77	5.72	0.99	1	38	2	5	3	1	2	4	1	0	0	0
0	2.11	27.8	4.48	2.15	4.89	0.9	1	34	3	5	3	1	2	4	0	0	0	1
0	2.11	27.5	4.17	1.3	5.11	1	2	39	2	5	3	0	2	2	0	0	0	0
0	2.11	23.6	4.44	1.9	4.77	1.03	1	41	3	5	3	2	2	3	0	0	0	1
0	2.11	26	4.97	1.53	4.91	1.36	2	37	2	5	3	0	3	3	0	0	0	0
0	2.11	21.2	4.75	1.43	5.46	1.09	1	33	2	5	3	0	1	4	1	1	0	0
0	2.11	24.2	5.32	0.53	4.49	1.6	2	39	2	5	3	0	1	3	0	0	0	0
0	2.11	20.1	4.53	0.88	4.89	1.24	1	30	2	5	3	0	2	4	1	0	0	0
0	2.11	17.9	4.94	0.45	4.97	1.78	2	33	2	5	3	0	1	5	0	0	0	0
0	2.11	23.6	4.41	1.74	4.66	1.04	1	33	2	5	3	0	2	3	0	0	0	1
0	2.11	24.8	4.62	0.83	4.5	1.28	2	34	2	5	3	0	2	4	0	1	0	0
0	2.11	24.9	4.71	1.84	6.72	0.91	1	34	2	5	3	0	2	3	1	0	0	1
0	2.11	20.1	4.68	1.17	4.97	1.4	2	28	2	5	3	0	2	5	0	0	0	0
0	2.11	19.7	4.74	1.48	4.69	1.15	2	32	1	5	3	0	3	4	0	0	0	0
0	2.11	18.1	4.54	0.92	4.98	1.5	2	31	2	5	3	0	2	3	0	0	0	0
0	2.1	25.4	6.89	2.42	6.58	1.16	1	35	2	5	3	0	2	3	0	0	0	1
0	2.1	22.4	4.57	1.43	5.21	1.32	2	36	2	5	3	0	1	4	0	0	0	0
0	2.1	27	4.07	2	5.01	0.85	1	57	2	5	3	1	2	2	1	0	0	1
0	2.1	21.3	4.32	1.15	4.65	1.04	1	33	2	5	3	0	2	4	0	0	0	0
0	2.1	22.3	4.99	0.7	5.22	1.57	2	39	2	5	3	0	2	3	0	0	0	0
0	2.1	23.4	4.61	0.7	5.38	1.43	2	37	2	5	3	0	2	4	0	0	0	0
0	2.1	21.9	4.69	0.42	4.26	1.45	2	38	2	5	3	0	2	4	0	0	0	0
0	2.1	21	5.09	0.68	4.72	2.02	2	39	2	4	3	0	2	3	0	0	0	0
0	2.1	23	4.87	1.12	4.99	0.98	2	33	2	5	3	0	3	3	0	0	0	0
0	2.1	24	3.93	1.68	5.74	0.81	1	35	2	5	3	0	1	4	0	0	0	0
0	2.1	26.9	5.74	1.76	5.05	1.48	1	42	2	5	3	0	2	3	0	0	0	1
0	2.1	16.4	4.65	0.66	5.15	1.67	2	35	2	5	3	0	2	4	0	0	0	0
0	2.1	22.7	5.35	1.47	5	1.27	1	31	2	5	3	1	2	5	1	0	0	0
0	2.1	22.8	4.6	0.64	5.72	1.31	2	34	2	5	3	0	2	5	0	0	0	0
0	2.1	25	5	1.11	5.54	1.47	2	40	2	5	3	0	2	3	0	0	0	0
0	2.1	28	4.43	5.34	5.5	0.91	1	28	2	3	4	1	2	6	0	1	0	1
0	2.09	0	4.61	0.9	5.04	1.31	2	40	2	5	3	1	2	3	1	0	0	0
0	2.09	24.9	5.54	3.05	5.31	1.05	1	36	2	5	3	1	2	4	1	0	0	1
0	2.09	26.5	4.71	3.33	5.06	0.95	1	37	2	5	3	1	2	3	1	0	0	1
0	2.09	21	4.63	1.01	5.3	1.17	1	41	2	5	3	0	2	3	0	0	0	0
0	2.09	25.6	5.03	0.83	4.89	1.22	2	40	2	5	3	0	1	3	0	0	0	0
0	2.09	29.8	4.48	4.02	5.54	0.85	1	33	2	5	3	1	1	4	0	1	0	1
0	2.09	26.5	5.35	2.84	6.66	1.01	1	44	2	5	3	1	2	3	0	0	0	1
0	2.09	25.4	3.88	0.76	5.26	0.86	2	34	2	5	3	0	1	3	0	0	0	0
0	2.09	0	6.23	1.59	5.17	1.24	2	39	2	5	3	0	1	4	0	0	0	1
0	2.09	23.5	4.39	0.76	5.63	0.95	1	37	2	5	4	0	3	2	1	1	0	0
0	2.09	23.7	5.03	1.5	4.94	1.38	2	34	2	4	3	0	1	3	0	0	0	0
0	2.09	0	4.7	1.58	5.17	1.03	2	34	2	5	3	0	1	4	0	0	0	0
0	2.09	23	4.64	0.77	4.47	1.33	2	33	1	5	3	0	2	4	0	0	0	0
0	2.09	21.4	4.63	0.5	5.35	1.42	2	29	2	5	3	0	1	5	0	0	0	0
0	2.09	25.6	5.17	2	5.33	1.16	2	34	2	5	3	0	1	4	0	0	0	1
0	2.09	19.3	4.9	2.01	5.4	1.08	1	25	1	5	3	1	3	4	1	0	0	1
0	2.09	27.1	5.22	2.28	5.8	1.04	1	53	2	3	3	2	1	2	0	1	0	1
0	2.08	23	4.36	1.17	4.65	1.13	2	39	2	5	3	0	2	3	0	0	0	0
0	2.08	20.9	4.23	1.37	4.5	1.01	1	34	2	5	3	0	1	2	1	0	0	0
0	2.08	25.6	4.21	2.29	4.64	0.95	1	36	2	5	3	1	2	3	0	0	0	1
0	2.08	19.5	4.28	1.62	4.77	1.05	1	32	2	5	3	1	2	4	0	0	0	0
0	2.08	22.4	6.06	2.51	5.12	1.1	1	35	2	5	3	0	2	3	0	1	0	1
0	2.08	24.8	5.51	5.34	4.94	0.93	1	33	2	5	3	0	3	5	0	0	0	1
0	2.08	21	4.62	1.02	5.07	1.08	1	35	2	5	3	1	3	5	0	0	0	0
0	2.08	26.5	5.25	0.89	5.43	1.31	1	38	2	5	3	0	1	4	1	0	0	0
0	2.08	32	4.38	1.45	5.31	0.99	1	35	2	5	3	0	2	2	0	0	0	0
0	2.08	24.1	4.11	1.53	5.18	0.86	1	37	2	5	3	0	2	4	1	0	0	0
0	2.08	23.2	4.33	0.86	4.51	1.15	2	34	2	5	3	0	1	4	0	0	0	0
0	2.08	22.7	4.3	0.69	4.76	1.1	2	34	2	4	3	0	3	5	0	0	0	0
0	2.08	20.5	5.01	1.36	4.92	1.02	2	32	2	5	3	0	1	5	0	1	0	0
0	2.08	25.1	4.37	3.52	5.21	1.03	1	35	2	5	3	0	3	5	0	0	0	1
[truncated: 2,889 more rows]
